# Supplementary material for: What will the cardiovascular disease slowdown cost? Modelling the impact of CVD trends on dementia, disability, and economic costs in England and Wales from 2020–2029
Source: PLoS One. 2022 Jun 29;17(6):e0268766. doi: 10.1371/journal.pone.0268766 (PMC9242440; doi:10.1371/journal.pone.0268766)
Supplement: S4 Data — (CSV) [file pone.0268766.s006.csv]

Model	Iter	Sex	Year	Age	P1_1	P1_2	P1_3	P1_4	P1_8	P1_9	P1_10	P2_2	P2_3	P2_5	P2_9	P2_10	P3_3	P3_6	P3_9	P3_10	P4_3	P4_4	P4_7	P4_9	P4_10	P5_2	P5_5	P5_9	P5_10	P6_3	P6_6	P6_9	P6_10	P7_4	P7_7	P7_9	P7_10	P8_1	P8_5	P8_6	P8_7	P8_8	P8_9	P8_10
2. CVD Fall	1	Men	2006	35	0.991131787	0.002406546	0	0	0.003113834	0.000187632	0.003160201	0.98094337	0	0.012863246	0.002036632	0.004156752	0.965792697	0.020003687	0.004967368	0.009236248	0	0.989839486	0	0.001008395	0.009152119	0.040154371	0.940736597	0.004653954	0.014455078	0	0.968621088	0.008305566	0.023073346	0	0.972452498	0.001901001	0.025646501	0.067008055	0.004374052	0	0	0.91582192	0.000951864	0.011844108
2. CVD Fall	1	Men	2006	36	0.991763589	0.002046678	0	0	0.002926807	0.000179839	0.003083087	0.970349142	0	0.02364401	0.001951658	0.00405519	0.963797275	0.022435001	0.004758636	0.009009088	0	0.990106521	0	0.000966427	0.008927053	0.060724474	0.920719818	0.004458541	0.014097167	0	0.969550522	0.007953748	0.02249573	0	0.973175914	0.001821712	0.025002374	0.080636751	0.005030124	0	0	0.901869041	0.000912255	0.011551828
2. CVD Fall	1	Men	2006	37	0.990302583	0.0033336	0	0	0.003183582	0.00017237	0.003007865	0.974150009	0	0.020023671	0.001870208	0.003956112	0.982156308	0.004497761	0.004558522	0.008787408	0	0.990366381	0	0.000926203	0.008707416	0.094389678	0.887591351	0.004271199	0.013747772	0	0.970452062	0.007616382	0.021931556	0	0.973881149	0.001745712	0.024373139	0.072223124	0.003993127	0	0	0.911642908	0.000874291	0.01126655
2. CVD Fall	1	Men	2006	38	0.990307329	0.003454244	0	0	0.003138726	0.000165212	0.002934489	0.968008194	0	0.026340212	0.001792137	0.003859457	0.951748374	0.035313887	0.004366666	0.008571073	0	0.990619272	0	0.00088765	0.008493077	0.09135525	0.891146481	0.004091592	0.013406678	0	0.971326665	0.007292864	0.02138047	0	0.974568734	0.001672866	0.0237584	0.07896948	0.006908257	0	0	0.902296258	0.000837905	0.010988099
2. CVD Fall	1	Men	2006	39	0.989373176	0.003433275	0	0	0.004172284	0.000158351	0.002862914	0.981246114	0	0.013271415	0.001717303	0.003765169	0.964819752	0.022637573	0.004182725	0.008359951	0	0.990865396	0	0.000850699	0.008283905	0.079816579	0.903190348	0.003919398	0.013073675	0	0.972175256	0.006982617	0.020842127	0	0.975239189	0.001603041	0.023157771	0.06159259	0.007768924	0	0	0.919119149	0.000803031	0.010716306
2. CVD Fall	1	Men	2006	40	0.990113706	0.003063906	0	0	0.002755016	0.000288281	0.003779091	0.976053963	0	0.015850613	0.00312556	0.004969865	0.963886106	0.017471967	0.007609596	0.01103233	0	0.987519453	0	0.001548531	0.010932016	0.077374033	0.898246194	0.007130841	0.017248932	0	0.959814495	0.012697489	0.027488015	0	0.966543722	0.002917654	0.030538624	0.076017466	0.009211751	0	0	0.899168694	0.001461771	0.014140317
2. CVD Fall	1	Men	2006	41	0.986983264	0.003674989	0	0	0.00537848	0.000276313	0.003686954	0.978964647	0	0.013191919	0.002994967	0.004848468	0.966685741	0.015265552	0.007288435	0.010760272	0	0.987853467	0	0.00148406	0.010662473	0.095910557	0.880439793	0.006830207	0.016819444	0	0.961051733	0.012155514	0.026792753	0	0.967441575	0.002795804	0.029762621	0.080338773	0.005761864	0	0	0.898708515	0.001400924	0.013789924
2. CVD Fall	1	Men	2006	42	0.987519296	0.004297875	0	0	0.004320899	0.000264844	0.003597086	0.974145616	0	0.018254546	0.002869789	0.004730049	0.943394727	0.039130007	0.006980505	0.01049476	0	0.988178313	0	0.001422269	0.010399419	0.065269534	0.911788408	0.006541967	0.01640009	0	0.962250888	0.011635719	0.026113393	0	0.968316786	0.00267901	0.029004205	0.070878336	0.008548918	0	0	0.90578226	0.001342607	0.013447879
2. CVD Fall	1	Men	2006	43	0.986732944	0.003982635	0	0	0.005521134	0.000253852	0.003509435	0.97465387	0	0.017981789	0.002749802	0.004614539	0.956269501	0.026809608	0.006685257	0.010235634	0	0.98849426	0	0.001363046	0.010142694	0.09816903	0.87957475	0.006265606	0.015990614	0	0.963413313	0.011137179	0.025449508	0	0.969170041	0.002567059	0.028262899	0.089442116	0.007440545	0	0	0.888716649	0.001286714	0.013113975
2. CVD Fall	1	Men	2006	44	0.986260042	0.004430232	0	0	0.005642459	0.000243318	0.003423949	0.958252619	0	0.034610721	0.00263479	0.00450187	0.973988134	0.009626967	0.006402161	0.009982738	0	0.98880157	0	0.001306287	0.009892143	0.077160349	0.901248258	0.006000629	0.015590763	0	0.964540308	0.010659009	0.024800683	0	0.970002009	0.002459753	0.027538238	0.078773884	0.009353688	0	0	0.897851273	0.001233146	0.012788008
2. CVD Fall	1	Men	2006	45	0.983538872	0.005143414	0	0	0.00597864	0.000443835	0.00489524	0.9656838	0	0.023075936	0.004804321	0.006435943	0.968038407	0.006027691	0.011667008	0.014266894	0	0.983480111	0	0.002382395	0.014137494	0.060398332	0.906391398	0.010935953	0.022274318	0	0.945174987	0.019411713	0.035413299	0	0.956198727	0.004485277	0.039315996	0.066748909	0.011134003	0	0	0.901595001	0.002249028	0.018273059
2. CVD Fall	1	Men	2006	46	0.982158567	0.005570275	0	0	0.007069635	0.000425426	0.004776097	0.968635462	0	0.020482438	0.004603225	0.006278874	0.940509071	0.034405353	0.011171677	0.013913899	0	0.983929042	0	0.002283178	0.01378778	0.064604032	0.903208087	0.010472356	0.021715525	0	0.946920632	0.018574483	0.034504885	0	0.957401462	0.00429766	0.038300878	0.064530304	0.009852441	0	0	0.905644072	0.002155391	0.017817792
2. CVD Fall	1	Men	2006	47	0.983591404	0.00523766	0	0	0.006103237	0.000407786	0.004659913	0.972141204	0	0.017322642	0.004410469	0.006125685	0.960546671	0.015187239	0.010696707	0.013569383	0	0.984365441	0	0.002188089	0.013446469	0.073689086	0.895113292	0.010027832	0.021169789	0	0.948611833	0.01777137	0.033616797	0	0.958573977	0.004117828	0.037308195	0.077798879	0.012780951	0	0	0.889981209	0.002065651	0.017373309
2. CVD Fall	1	Men	2006	48	0.983018264	0.00539267	0	0	0.006651564	0.000390882	0.004546621	0.96379854	0	0.025999468	0.004225707	0.005976285	0.948732887	0.027792721	0.010241252	0.01323314	0	0.984789682	0	0.002096959	0.013113359	0.077686944	0.892074688	0.009601591	0.020636777	0	0.950250561	0.017000957	0.032748482	0	0.959717216	0.003945458	0.036337326	0.081800353	0.012708319	0	0	0.886572339	0.001979648	0.016939341
2. CVD Fall	1	Men	2006	49	0.981683962	0.006387577	0	0	0.007117621	0.000374684	0.004436156	0.96532024	0	0.024800559	0.00404861	0.005830591	0.944399136	0.03289139	0.009804503	0.012904971	0	0.985202125	0	0.002009624	0.012788251	0.064940978	0.905749985	0.009192872	0.020116165	0	0.951838713	0.016261884	0.031899402	0	0.960832091	0.003780241	0.035387668	0.08448648	0.010994981	0	0	0.886105683	0.001897227	0.016515629
2. CVD Fall	1	Men	2006	50	0.967673596	0.006758674	7.04E-05	0.010237276	0.00783585	0.000614119	0.006810093	0.939499826	0.025755082	0.019162859	0.006632314	0.008949919	0.930267751	0.033884163	0.016048218	0.019799867	0.008379725	0.954559913	0.014146358	0.003293068	0.019620936	0.067011028	0.887091265	0.015048405	0.030849301	0.074899961	0.849624951	0.026593223	0.048881865	0.076981159	0.862611097	0.006192918	0.054214826	0.076301482	0.012031818	0.000287401	0.023042067	0.85989465	0.00310894	0.025333643
2. CVD Fall	1	Men	2006	51	0.9718511	0.007700651	3.99E-05	0.005120448	0.008054266	0.000588691	0.006644899	0.954741646	0.00656708	0.023605204	0.00635411	0.00873196	0.961000694	0.004329777	0.01536148	0.019308048	0.009991926	0.956392073	0.011326359	0.003155923	0.019133719	0.074482182	0.881044262	0.014405801	0.030067755	0.03464342	0.892322415	0.025430109	0.047604056	0.120260775	0.821021143	0.005933389	0.052784693	0.077642058	0.012147048	1.10E-05	0.000889827	0.881632512	0.002979515	0.024698088
2. CVD Fall	1	Men	2006	52	0.977030598	0.006800756	7.94E-06	0.001157507	0.007955008	0.000564328	0.006483868	0.944111378	0.0160749	0.02520682	0.006087454	0.008519449	0.934542864	0.031926181	0.014702911	0.018828044	0.008507634	0.959327233	0.010482422	0.003024498	0.018658213	0.06051893	0.896387209	0.013789586	0.029304275	0.076278936	0.853052768	0.024314194	0.046354102	0.095224008	0.847706121	0.00568464	0.051385231	0.084015622	0.015153225	0.000121884	0.007857384	0.86591889	0.002855489	0.024077506
2. CVD Fall	1	Men	2006	53	0.971831138	0.008281118	3.06E-05	0.00364787	0.009341404	0.000540986	0.00632691	0.953046531	0.008012575	0.024796757	0.00583187	0.008312268	0.9478808	0.019688277	0.014071346	0.018359577	0.009890781	0.959305849	0.009710668	0.002898558	0.018194144	0.082090888	0.876152037	0.013198669	0.028558406	0.066870504	0.864754723	0.023243527	0.045131245	0.084208572	0.860329609	0.005446227	0.050015593	0.085350369	0.016593313	0.000258214	0.015064657	0.856525276	0.00273664	0.023471531
2. CVD Fall	1	Men	2006	54	0.97247991	0.008607008	2.38E-05	0.002728355	0.009468411	0.000518623	0.00617394	0.961651963	0.001965391	0.022685441	0.005586903	0.008110301	0.93744378	0.031188174	0.01346567	0.017902376	0.012346123	0.953026775	0.014107981	0.002777877	0.017741245	0.085810581	0.873727706	0.012632006	0.027829707	0.061302697	0.872546306	0.022216245	0.043934751	0.076193998	0.869913322	0.005217724	0.048674956	0.080562549	0.015268669	0	0	0.878666216	0.002622757	0.02287981
2. CVD Fall	1	Men	2006	55	0.961217327	0.008867781	8.72E-05	0.009651973	0.010038185	0.000788831	0.009348688	0.949462507	0.001668368	0.028098592	0.008491393	0.01227914	0.910246267	0.042224911	0.020442384	0.027086439	0.011505431	0.945001604	0.01242625	0.004223775	0.02684294	0.07607517	0.862667567	0.019179145	0.042078118	0.067861084	0.832099621	0.033683318	0.066355976	0.083617192	0.834960525	0.007930719	0.073491564	0.089982959	0.017811898	0	0	0.853611534	0.003988005	0.034605604
2. CVD Fall	1	Men	2006	56	0.960847781	0.009192639	7.71E-05	0.008236288	0.011766633	0.000756272	0.009123324	0.95220422	0.004588534	0.02309143	0.008134385	0.011981432	0.911539508	0.042491128	0.01955859	0.026410774	0.012558313	0.942958729	0.01426131	0.00404799	0.026173658	0.07343876	0.867210141	0.018352375	0.040998724	0.109257196	0.793982081	0.032182788	0.064577935	0.084602527	0.836302085	0.007597726	0.071497661	0.08866456	0.016414668	0.000720467	0.041325717	0.815322368	0.003822127	0.033730093
2. CVD Fall	1	Men	2006	57	0.956898176	0.008873951	0.000114253	0.012597134	0.011887621	0.000725085	0.00890378	0.944579152	0.013023822	0.02291347	0.007792233	0.011691323	0.91751362	0.038023954	0.018711007	0.025751419	0.010583053	0.940804807	0.019212025	0.003879569	0.025520546	0.05769838	0.884798045	0.017559528	0.039944046	0.072387231	0.834032199	0.030742974	0.062837596	0.07822986	0.844946354	0.007278603	0.069545184	0.074915373	0.018406321	0.000581033	0.030020003	0.839538917	0.003663199	0.032875154
2. CVD Fall	1	Men	2006	58	0.956272062	0.009398643	0.000112956	0.011762602	0.013068581	0.000695214	0.008689943	0.924095946	0.029683211	0.027347847	0.007464332	0.011408663	0.893977361	0.063016479	0.017898151	0.02510801	0.015587989	0.937507264	0.018303292	0.003718212	0.024883244	0.067510983	0.87677632	0.016799214	0.038913483	0.064807978	0.844696646	0.029361407	0.06113397	0.099134665	0.826259523	0.006972783	0.067633029	0.093217965	0.020660058	1.11E-05	0.000527961	0.850031627	0.003510941	0.032040305
2. CVD Fall	1	Men	2006	59	0.95630839	0.010146775	0.000111428	0.010750862	0.013534233	0.000666606	0.008481706	0.931158413	0.021025249	0.029532929	0.007150102	0.011133308	0.922993898	0.035407303	0.017118603	0.024480196	0.014516462	0.942201677	0.015456823	0.003563633	0.024261405	0.065073151	0.880950287	0.016070105	0.037906457	0.045577379	0.866920789	0.028035729	0.059466102	0.075884585	0.85167555	0.006679725	0.06576014	0.085994121	0.017922902	8.00E-05	0.004366133	0.857046635	0.003365081	0.031225084
2. CVD Fall	1	Men	2006	60	0.959677233	0.010076865	3.33E-05	0.003263582	0.012548216	0.001067456	0.013333316	0.919107108	0.023349529	0.028607492	0.011437543	0.017498327	0.883985816	0.050236284	0.027338953	0.038438948	0.010929933	0.924818447	0.020451771	0.005703851	0.038095998	0.076605461	0.838261967	0.025668859	0.059463713	0.052715031	0.809450194	0.044694334	0.093140441	0.08668201	0.799679735	0.010685934	0.102952321	0.095544039	0.018960853	0.000422158	0.02135764	0.809322964	0.005386229	0.049006116
2. CVD Fall	1	Men	2006	61	0.949854517	0.010959558	0.000113706	0.010154778	0.014878289	0.00102365	0.013015504	0.938660237	0.003362263	0.029944048	0.010955708	0.017077743	0.898935328	0.037446494	0.026141693	0.037476485	0.014396003	0.922317258	0.020676996	0.005466996	0.037142747	0.064020549	0.853515176	0.024549222	0.057915053	0.060817321	0.805961435	0.042656071	0.090565173	0.094669331	0.795036359	0.010236605	0.100057705	0.085277626	0.019149207	0	0	0.842656127	0.005162742	0.047754297
2. CVD Fall	1	Men	2006	62	0.950617868	0.01066174	9.63E-05	0.008856917	0.016079201	0.000981709	0.012706244	0.931196241	0.010316453	0.031324973	0.010494041	0.016668292	0.875595047	0.062873809	0.024993562	0.036537582	0.01545285	0.918960083	0.02413406	0.005240146	0.036212859	0.07430441	0.845818266	0.023475606	0.056401718	0.044478914	0.826777413	0.040700379	0.088043293	0.094383706	0.798588493	0.009806105	0.097221696	0.088790747	0.02419201	0.000461548	0.018259816	0.816815153	0.004948702	0.046532023
2. CVD Fall	1	Men	2006	63	0.945337498	0.012579954	0.000145676	0.011301802	0.017288108	0.00094156	0.0124054	0.924428384	0.015776849	0.033473247	0.010051732	0.016269788	0.89771226	0.042773388	0.023892584	0.035621768	0.015932218	0.917608458	0.026130553	0.005022903	0.035305868	0.068520482	0.854110437	0.022446161	0.054922921	0.042567388	0.833035071	0.038824001	0.08557354	0.077265333	0.81889807	0.009393678	0.094442919	0.088004627	0.024103717	0.000490811	0.019465289	0.817853162	0.004743731	0.045338664
2. CVD Fall	1	Men	2006	64	0.947512793	0.012672918	0.000133147	0.010264022	0.016401147	0.000903133	0.012112841	0.912787808	0.022829695	0.038872438	0.009628007	0.015882052	0.888960086	0.05347445	0.022836873	0.034728591	0.016907472	0.922103297	0.02175302	0.004814883	0.034421328	0.068741393	0.856321577	0.021459117	0.053477913	0.085564864	0.794256576	0.037023832	0.083154728	0.093854389	0.805426923	0.008998602	0.091720086	0.100037721	0.025311123	0.000473492	0.017889849	0.807566725	0.004547468	0.044173621
2. CVD Fall	1	Men	2006	65	0.938373482	0.013169508	0.000143964	0.010669477	0.017071523	0.001456793	0.019115253	0.908228973	0.015946771	0.035260556	0.015507118	0.025056582	0.841516336	0.067069986	0.036698378	0.0547153	0.016506704	0.89847301	0.023026482	0.007761394	0.05423241	0.070129421	0.811237337	0.034492499	0.084140743	0.067465214	0.742629544	0.059352188	0.130553054	0.08367636	0.757917034	0.01449495	0.143911657	0.093642148	0.025187207	0.000794243	0.029775364	0.773721923	0.007330669	0.069548448
2. CVD Fall	1	Men	2006	66	0.934338446	0.013486473	0.000166326	0.01201625	0.019926195	0.001397629	0.018668681	0.90727105	0.017943786	0.035467706	0.014853445	0.024464013	0.845409163	0.066181319	0.035066486	0.053343032	0.018613848	0.889040413	0.032031409	0.007440815	0.052873514	0.078080879	0.807040757	0.03296699	0.081911374	0.065420662	0.751208974	0.056566805	0.126803559	0.079282127	0.767145688	0.01388555	0.139686635	0.099190003	0.025581527	0	0	0.800445744	0.007028228	0.067754498
2. CVD Fall	1	Men	2006	67	0.931303961	0.015362863	0.000208169	0.013160831	0.020388177	0.001341035	0.018234964	0.911662536	0.013648938	0.036572959	0.01422746	0.023888107	0.862835704	0.051656851	0.033502048	0.052005397	0.019189008	0.889791559	0.032336471	0.007133991	0.051548971	0.065107949	0.823654044	0.031504654	0.079733353	0.053048239	0.769924985	0.053895372	0.123131404	0.086469979	0.764681311	0.013302002	0.135546708	0.093854444	0.02566805	0.00065745	0.024316444	0.782761142	0.006738772	0.066003697
2. CVD Fall	1	Men	2006	68	0.929019231	0.015393023	0.00022189	0.013988266	0.022276721	0.001286911	0.017813957	0.895985743	0.026403632	0.040653887	0.01362808	0.023328657	0.853396532	0.063899199	0.032002441	0.050701828	0.021538076	0.887902527	0.033460792	0.006840387	0.050258218	0.067539518	0.824751725	0.03010303	0.077605727	0.064309814	0.764821373	0.051333616	0.119535198	0.081463732	0.774302543	0.012743297	0.131490427	0.093825743	0.026170253	0.000563625	0.020519172	0.788164129	0.006461799	0.06429528
2. CVD Fall	1	Men	2006	69	0.929930762	0.014540897	0.000230525	0.015375593	0.021281529	0.001235164	0.017405529	0.89984596	0.020145285	0.044169003	0.013054276	0.022785477	0.85087562	0.069127419	0.030565168	0.049431792	0.021548211	0.884943937	0.037947626	0.006559497	0.04900073	0.079321016	0.816391601	0.028759773	0.075527609	0.061737763	0.773371073	0.048877476	0.116013689	0.054378197	0.805896813	0.012208474	0.127516517	0.105819145	0.030033384	0	0	0.795322111	0.006196831	0.06262853
2. CVD Fall	1	Men	2006	70	0.913003755	0.015964233	0.000281825	0.017065483	0.024070652	0.0020607	0.027553352	0.877179839	0.021762892	0.043268258	0.021733211	0.036055799	0.795009241	0.076194154	0.050727103	0.078069501	0.024910683	0.847223011	0.039541998	0.010933176	0.077391132	0.069114063	0.764081985	0.047746168	0.119057783	0.038183389	0.698619316	0.080854945	0.18234235	0.084444811	0.694971946	0.020328165	0.200255079	0.096731028	0.028916156	0.000638764	0.020974015	0.74359385	0.010329366	0.098816821
2. CVD Fall	1	Men	2006	71	0.907596293	0.016752237	0.000353915	0.020335449	0.026051556	0.001978571	0.026931979	0.877395072	0.02737739	0.039179859	0.020819824	0.035227854	0.81413602	0.06131178	0.048433657	0.076118542	0.017284531	0.8590765	0.037692604	0.010486712	0.075459654	0.068416113	0.770132775	0.045603079	0.115848033	0.047543495	0.69864803	0.076933656	0.17687482	0.071093934	0.715349456	0.019476976	0.194079634	0.091838396	0.031369701	0	0	0.770634884	0.009908248	0.096248772
2. CVD Fall	1	Men	2006	72	0.90819019	0.017925003	0.0003655	0.019617573	0.025671086	0.001900132	0.026330515	0.875152567	0.027202897	0.043272967	0.019946006	0.034425563	0.820153948	0.059389577	0.04623674	0.074219735	0.024537258	0.850109886	0.041712996	0.010059942	0.073579917	0.0651247	0.778610098	0.043550346	0.112714856	0.062422423	0.692877089	0.073176844	0.171523643	0.067503389	0.725800739	0.018662739	0.188033133	0.108793129	0.034432939	0	0	0.753522925	0.009505727	0.093745279
2. CVD Fall	1	Men	2006	73	0.8982035	0.01856903	0.000515994	0.026520589	0.028616774	0.001825249	0.025748864	0.866463792	0.038493264	0.042283894	0.019110284	0.033648766	0.802921448	0.080573259	0.044132797	0.072372496	0.023382573	0.851072862	0.044141074	0.009652145	0.071751345	0.071378192	0.777379901	0.04158463	0.109657277	0.055079124	0.709054317	0.069578797	0.166287762	0.076059375	0.723941878	0.017884082	0.182114665	0.098896602	0.036674679	0.001124513	0.028625152	0.734252388	0.009121123	0.091305542
2. CVD Fall	1	Men	2006	74	0.902264824	0.019826003	0.000411411	0.019917834	0.030639171	0.001753797	0.025186959	0.865551488	0.038050837	0.045189076	0.01831126	0.03289734	0.827187081	0.060118156	0.042118453	0.070576309	0.031229236	0.850884177	0.038650523	0.009262633	0.06997343	0.074732975	0.778889825	0.039702759	0.106674441	0.059094016	0.71360552	0.066134097	0.161166367	0.074783921	0.731752762	0.017139699	0.176323618	0.100149442	0.033331017	0.003299289	0.086770646	0.678766965	0.008753788	0.088928852
2. CVD Fall	1	Men	2006	75	0.870868824	0.020030243	0.000623856	0.029581094	0.034130325	0.003041117	0.041724541	0.847681163	0.023178391	0.043015494	0.031657867	0.054467084	0.727951972	0.083006703	0.072508227	0.116533098	0.031358184	0.783951425	0.053107782	0.016039934	0.115542675	0.065210759	0.690731026	0.068379004	0.175679211	0.03781524	0.58443552	0.113366172	0.264383067	0.072001092	0.609426859	0.029638607	0.288933443	0.107110136	0.038193824	0.000770767	0.019010452	0.673112791	0.01516016	0.146641869
2. CVD Fall	1	Men	2006	76	0.875362635	0.023728331	0.000584976	0.023474951	0.033085201	0.002923958	0.040839947	0.821872212	0.045620967	0.048884715	0.030341681	0.053280425	0.748712546	0.06844427	0.069180367	0.113662817	0.031377332	0.789500858	0.05102006	0.015399732	0.112702017	0.062292596	0.701558285	0.065270405	0.170878713	0.05168485	0.584540041	0.107677541	0.256097569	0.080502945	0.611525034	0.028412732	0.279559289	0.102909089	0.044801229	0.000154816	0.003288904	0.691460911	0.014556495	0.142828557
2. CVD Fall	1	Men	2006	77	0.862537548	0.023558851	0.000802336	0.032132664	0.038167452	0.002812381	0.039988768	0.817392366	0.052518913	0.048867367	0.029084871	0.052136483	0.746538693	0.076586552	0.065997681	0.110877074	0.023827548	0.796126862	0.055311152	0.014789184	0.109945254	0.076006516	0.695494259	0.062297589	0.166201637	0.059908027	0.589848507	0.10223918	0.248004286	0.074995386	0.627361613	0.027242324	0.270400677	0.1004845	0.043907308	0	0	0.702508024	0.013980839	0.139119329
2. CVD Fall	1	Men	2006	78	0.869355964	0.023280343	0.000714328	0.029055952	0.035716094	0.002706208	0.039171111	0.841084717	0.029455294	0.050539281	0.027885395	0.051035313	0.75102491	0.077844382	0.062955233	0.108175475	0.034497623	0.7793514	0.064671681	0.014207296	0.107272	0.066846439	0.712050305	0.059455915	0.161647341	0.062731836	0.600121505	0.097043175	0.240103484	0.073479692	0.638936361	0.026125478	0.26145847	0.113912735	0.050571182	0	0	0.686570215	0.013432257	0.135513611
2. CVD Fall	1	Men	2006	79	0.857041812	0.025568843	0.000956645	0.035108493	0.040331793	0.00260527	0.038387143	0.820752721	0.05207441	0.050454508	0.026741318	0.049977043	0.742835023	0.091558896	0.06004834	0.105557742	0.035378742	0.79204411	0.054242033	0.013653132	0.104681983	0.075666332	0.710377301	0.056740982	0.157215384	0.063066834	0.612455367	0.092081999	0.2323958	0.048242027	0.67396363	0.025060392	0.25273395	0.107333126	0.044607976	0.004345807	0.08442786	0.614364388	0.012909867	0.132010977
2. CVD Fall	1	Men	2006	80	0.821548998	0.030036606	0.001376933	0.042455532	0.036847104	0.004429576	0.06330525	0.772012626	0.053687102	0.046668398	0.045278448	0.082353426	0.636292102	0.089326225	0.101096709	0.173284963	0.036715734	0.717197524	0.051059733	0.023169494	0.171857515	0.075341314	0.571890617	0.095582365	0.257185703	0.046391503	0.421172313	0.154186298	0.378249886	0.063631099	0.483133731	0.042444532	0.410790638	0.112015386	0.059449123	0	0	0.590301723	0.021910963	0.216322805
2. CVD Fall	1	Men	2006	81	0.816641297	0.032340883	0.001485307	0.042424658	0.040737584	0.004269074	0.062101198	0.757469499	0.060573918	0.057792721	0.043445018	0.080718844	0.640858954	0.093556649	0.09642095	0.169163446	0.047640917	0.692213595	0.070080366	0.022284595	0.167780527	0.080172	0.578470524	0.091215723	0.250141753	0.047395271	0.44044339	0.146220553	0.365940786	0.060936075	0.501468223	0.04073834	0.396857362	0.10516946	0.047153953	0.001567838	0.030611564	0.583643164	0.021077007	0.210777014
2. CVD Fall	1	Men	2006	82	0.804277481	0.028669589	0.001551615	0.049790323	0.050638689	0.004117039	0.060955264	0.779635354	0.044125464	0.055381195	0.041700222	0.079157764	0.654087059	0.088768092	0.091962133	0.165182716	0.038801062	0.700476064	0.075435337	0.021444247	0.163843291	0.070521739	0.59912327	0.087051813	0.243303178	0.043138985	0.46426496	0.138633033	0.353963022	0.055814293	0.521770429	0.039114992	0.383300286	0.114635557	0.060877563	0.003058677	0.044780808	0.550958334	0.020285153	0.205403907
2. CVD Fall	1	Men	2006	83	0.817557676	0.032655836	0.001345468	0.038225615	0.046374009	0.003973252	0.059868142	0.746292983	0.073614162	0.062380638	0.040041348	0.07767087	0.638327009	0.112616421	0.087713545	0.161343025	0.045238521	0.695403747	0.078664499	0.020647169	0.160046064	0.074068978	0.606176288	0.083084334	0.2366704	0.052507318	0.47376039	0.13141264	0.342319652	0.066769666	0.5255347	0.037571965	0.370123669	0.120488283	0.047414084	0.00982679	0.16184756	0.440685403	0.019534198	0.200203684
2. CVD Fall	1	Men	2006	84	0.81538329	0.037203819	0.001100856	0.027638606	0.055995284	0.00383751	0.058840635	0.753852535	0.07404816	0.057374504	0.038465837	0.076258963	0.651214159	0.107472267	0.083668796	0.157644779	0.0435549	0.682487081	0.097676596	0.019892164	0.156389259	0.077798364	0.612650274	0.079307293	0.230244069	0.046874257	0.49756302	0.124548675	0.331014048	0.061594706	0.544966364	0.036106884	0.357332047	0.108900862	0.051450368	0.007526695	0.12009402	0.498028305	0.018823018	0.195176732
2. CVD Fall	1	Men	2006	85	0.810340603	0.039344417	0.001081508	0.02567133	0.052770351	0.004363346	0.066428445	0.742707468	0.084801183	0.043006985	0.043486402	0.085997961	0.625415733	0.103830535	0.09388808	0.176865652	0.041906772	0.671598812	0.088465765	0.022557714	0.175470938	0.080453091	0.573349266	0.089057562	0.25714008	0.045118937	0.448691679	0.13883031	0.367359074	0.077787153	0.485460207	0.040835474	0.395917167	0.121497121	0.053042963	0.013128498	0.185272715	0.387252663	0.021349084	0.218456955
2. CVD Fall	1	Men	2006	86	0.724698756	0.044044132	0.005181198	0.100073508	0.056391268	0.004221984	0.065389155	0.695172407	0.11801687	0.060436917	0.041821027	0.084552778	0.617036789	0.120426873	0.089588892	0.172947445	0.061178845	0.6467259	0.098732486	0.021764812	0.171597957	0.096424255	0.568291801	0.085043081	0.250240863	0.036861115	0.476409656	0.131559061	0.355170168	0.068234144	0.510343285	0.039287849	0.382134723	0.109044052	0.077579165	0.007197937	0.077706325	0.494783202	0.020602559	0.21308676
2. CVD Fall	1	Men	2006	87	0.74353242	0.028170077	0.003062416	0.09498984	0.061733963	0.0040895	0.064421783	0.719398304	0.098905136	0.058253663	0.040245695	0.083197202	0.631366021	0.113931267	0.085508876	0.169193836	0.027422965	0.678677653	0.104993213	0.021017759	0.16788841	0.078921183	0.596263438	0.081233333	0.243582045	0.034910442	0.497036495	0.124671483	0.34338158	0.052473616	0.540891602	0.037824483	0.368810299	0.113377276	0.024502505	0.030584004	0.524615525	0.079103495	0.019899406	0.207917789
2. CVD Fall	1	Men	2006	88	0.752968746	0.039571942	0.003752919	0.08286985	0.053343067	0.003965744	0.063527732	0.738865046	0.069955991	0.070488274	0.03875804	0.081932649	0.613933784	0.138818735	0.08164171	0.16560577	0.047058747	0.639020009	0.129262476	0.020315521	0.164343246	0.060789139	0.624423431	0.077622426	0.237165004	0.050202104	0.499644226	0.118156231	0.331997439	0.068734394	0.538873505	0.036443193	0.355948908	0.107641186	0.059126319	0.021519728	0.245321969	0.3442011	0.019238663	0.202951036
2. CVD Fall	1	Men	2006	89	0.771495784	0.039440779	0.002469413	0.056452127	0.063582793	0.003850583	0.062708522	0.680277057	0.128465297	0.073141169	0.037355834	0.080760642	0.629909563	0.129924905	0.077981291	0.162184241	0.053121245	0.658670716	0.107587423	0.019657154	0.160963463	0.068096165	0.626708023	0.074204678	0.230991134	0.051892325	0.515083954	0.112002119	0.321021601	0.066340555	0.55496241	0.035141927	0.343555109	0.122278356	0.062631092	0.014542479	0.173896109	0.409844987	0.018619447	0.198187529
2. CVD Fall	1	Men	2006	90	0.662806182	0.039771339	0.00432326	0.093721848	0.076778299	0.006580407	0.116018665	0.610010467	0.099589782	0.077869773	0.063339699	0.149190279	0.426743022	0.144709886	0.130981632	0.29756546	0.063667173	0.501427334	0.106081249	0.033468442	0.295355802	0.065891004	0.387978189	0.124747128	0.421383679	0.051031631	0.181041067	0.186657005	0.581270297	0.070304494	0.249161949	0.059616647	0.62091691	0.054311201	0.006728636	0.003846988	0.507047837	1.11E-16	0.003250014	0.424815324
2. CVD Fall	1	Men	2006	91	0.675209197	0.041200024	0.003843992	0.081494586	0.0770701	0.00640767	0.114774431	0.582566688	0.147802227	0.061114747	0.061164628	0.147351711	0.471897039	0.111070685	0.125243767	0.29178851	0.051208004	0.4770756	0.149602612	0.032461068	0.289652717	0.077597882	0.392269592	0.119390255	0.410742271	0.048763332	0.211917648	0.17705153	0.562267491	0.055330808	0.287584774	0.057600813	0.599483604	0.147540297	0.076151359	0.011520708	0.119886115	0.259760068	0.030762873	0.354378582
2. CVD Fall	1	Men	2006	92	0.623798599	0.043370668	0.007042943	0.132660256	0.073197944	0.006249575	0.113680015	0.560944967	0.16002126	0.074208609	0.059129238	0.145695926	0.471500882	0.122331584	0.119838788	0.286328746	0.065044075	0.480420732	0.138743851	0.031526649	0.284264692	0.06404084	0.421051588	0.114344621	0.40056295	0.049639816	0.238292384	0.168022615	0.544045185	0.05303216	0.312308565	0.055716008	0.578943267	0.128674167	0.082090216	0	0	0.412737814	0.029885552	0.346612252
2. CVD Fall	1	Men	2006	93	0.654579642	0.052150041	0.006318576	0.101749246	0.066357468	0.006106041	0.112738986	0.587636988	0.137719499	0.073186824	0.057230373	0.144226316	0.432782036	0.17127343	0.114756905	0.281187629	0.060906987	0.503049226	0.126186524	0.030664056	0.279193207	0.070555599	0.428996015	0.109601198	0.390847189	0.046021256	0.267821853	0.159550884	0.526606008	0.068128983	0.318613565	0.053959361	0.55929809	0.13317999	0.069816119	0.015219894	0.163761854	0.249712919	0.02907635	0.339232873
2. CVD Fall	1	Men	2006	94	0.611349222	0.061964299	0.008087959	0.107368123	0.093298328	0.005977026	0.111955041	0.512810696	0.210789392	0.077988582	0.055465014	0.142946317	0.501850746	0.111794525	0.109988428	0.276366301	0.080898299	0.469184643	0.145605355	0.029872276	0.274439427	0.060772317	0.452480786	0.105151062	0.381595834	0.037444932	0.30098734	0.151616884	0.509950845	0.05735881	0.349765007	0.052328138	0.540548046	0.121125498	0.063893021	0.009971428	0.125024878	0.319409635	0.028334347	0.332241194
2. CVD Fall	1	Men	2006	95	0.637250651	0.049937201	0.006088097	0.102578825	0.086950719	0.005862528	0.111331979	0.61827177	0.114187788	0.071850821	0.053830253	0.141859368	0.471574889	0.151035895	0.105523719	0.271865497	0.087287354	0.44223366	0.171324467	0.029150403	0.270004116	0.060490585	0.465715081	0.100985359	0.372808975	0.04680292	0.314917382	0.144201048	0.49407865	0.039927558	0.386562036	0.050819717	0.522690689	0.126361721	0.067625759	0.029305277	0.273025927	0.150385189	0.027658729	0.325637397
2. CVD Fall	1	Men	2006	96	0.574458395	0.050886477	0.009381123	0.146276689	0.102361065	0.005762584	0.110873667	0.494210704	0.23142298	0.081074185	0.052323273	0.140968859	0.442213958	0.188747449	0.101353149	0.267685444	0.084993179	0.450304752	0.170316904	0.028497628	0.265887537	0.060924956	0.477493981	0.097095252	0.364485811	0.026823143	0.356906893	0.13728368	0.478986285	0.057822122	0.387025292	0.049431568	0.505721018	0.04010122	0.009781137	0.009563225	0.61646585	2.22E-16	0.002307433	0.321781136
2. CVD Fall	1	Men	2006	97	0.570760799	0.050262584	0.009130136	0.144594692	0.108990521	0.005677268	0.110584	0.445454322	0.276729602	0.086596684	0.05094132	0.140278071	0.479148545	0.159558626	0.097467059	0.26382577	0.099098095	0.472357027	0.138542289	0.027913231	0.262089357	0.070863052	0.479040524	0.093471888	0.356624536	0.026676097	0.377810564	0.130844947	0.464668391	0.04975828	0.412449129	0.04816123	0.489631362	0.126341756	0.118175251	0.010668421	0.07213286	0.332587147	0.026503869	0.313590696
2. CVD Fall	1	Men	2006	98	0.48031148	0.046123496	0.013927304	0.217998065	0.125566098	0.005606698	0.110466859	0.402875141	0.335663346	0.071989712	0.049681682	0.139790119	0.53550745	0.11035141	0.093855728	0.260285411	0.08238163	0.485515704	0.146097543	0.027396566	0.258608557	0.066366302	0.494305104	0.090106364	0.34922223	0.049244372	0.374773428	0.124864892	0.451117308	0.041859251	0.436723129	0.047006285	0.474411335	0.134427551	0.065696798	0.043048771	0.352818126	0.069840952	0.026023444	0.308144358
2. CVD Fall	1	Men	2006	99	0.580587931	0.046572989	0.00716725	0.126201164	0.123393579	0.00555103	0.110526056	0.424101706	0.289812491	0.098036264	0.04854166	0.139507879	0.47552059	0.176907543	0.090509349	0.257062518	0.080283318	0.50872745	0.128598837	0.026947054	0.255443341	0.074338979	0.496396555	0.086989699	0.342274767	0.050409877	0.391943645	0.119323449	0.438323029	0.072049848	0.421937983	0.045964339	0.46004783	0.116943665	0.09798992	0.004454994	0.039031732	0.412893819	0.025607022	0.303078848
2. CVD Fall	1	Men	2006	100	0.361673304	0.051140831	0.026379382	0.313910987	0.130619746	0.005510463	0.110765287	0.43401051	0.277591518	0.101445508	0.047518544	0.139433919	0.484880595	0.173547013	0.08741801	0.254154382	0.115118251	0.428984954	0.176741571	0.026564167	0.252591057	0.06081095	0.519299489	0.084112812	0.335776748	0.038230262	0.42129605	0.114200486	0.426273203	0.059306589	0.449135354	0.045032992	0.446525066	0.117939883	0.098178214	0.014112452	0.111565418	0.334559871	0.02525417	0.298389992
2. CVD Fall	1	Men	2007	35	0.99083773	0.002706713	0	0	0.003113834	0.000187761	0.003153961	0.980950178	0	0.012863246	0.002038031	0.004148545	0.96580752	0.020003687	0.004970779	0.009218013	0	0.989856862	0	0.001009087	0.00913405	0.040154371	0.940761939	0.004657151	0.014426539	0	0.968660937	0.008311271	0.023027793	0	0.972501826	0.001902307	0.025595867	0.067008055	0.004919625	0	0	0.915299077	0.000952518	0.011820724
2. CVD Fall	1	Men	2007	36	0.991581276	0.002234954	0	0	0.002926807	0.000179963	0.003077001	0.970355808	0	0.02364401	0.001952998	0.004047184	0.963811793	0.022435001	0.004761905	0.008991302	0	0.990123481	0	0.000967091	0.008909428	0.060724474	0.920744588	0.004461603	0.014069335	0	0.969589472	0.007959211	0.022451317	0	0.973224025	0.001822963	0.024953012	0.080636751	0.005492851	0	0	0.901428495	0.000912881	0.011529021
2. CVD Fall	1	Men	2007	37	0.990113055	0.003528948	0	0	0.003183582	0.000172488	0.003001927	0.974156535	0	0.020023671	0.001871493	0.003948301	0.982170526	0.004497761	0.004561653	0.008770059	0	0.990382935	0	0.000926839	0.008690226	0.094389678	0.887615559	0.004274132	0.01372063	0	0.97049013	0.007621613	0.021888257	0	0.973928069	0.001746911	0.024325019	0.072223124	0.004227124	0	0	0.911430554	0.000874892	0.011244306
2. CVD Fall	1	Men	2007	38	0.990227441	0.003539813	0	0	0.003138726	0.000165325	0.002928695	0.968014583	0	0.026340212	0.001793368	0.003851838	0.951762297	0.035313887	0.004369666	0.008554151	0	0.990635431	0	0.00088826	0.00847631	0.09135525	0.891170139	0.004094402	0.013380209	0	0.971363868	0.007297874	0.021338259	0	0.974614491	0.001674015	0.023711494	0.07896948	0.007079388	0	0	0.902146246	0.00083848	0.010966406
2. CVD Fall	1	Men	2007	39	0.989407428	0.003404567	0	0	0.004172284	0.00015846	0.002857261	0.981252368	0	0.013271415	0.001718482	0.003757735	0.964833384	0.022637573	0.004185598	0.008343446	0	0.990881166	0	0.000851284	0.00826755	0.079816579	0.903213467	0.00392209	0.013047864	0	0.972211608	0.006987413	0.020800979	0	0.975283808	0.001604142	0.02311205	0.06159259	0.007703962	0	0	0.919204717	0.000803582	0.010695149
2. CVD Fall	1	Men	2007	40	0.990253235	0.002943185	0	0	0.002755016	0.00027997	0.003768593	0.97615787	0	0.015850613	0.003035458	0.004956059	0.964136118	0.017471967	0.00739023	0.011001684	0	0.987594461	0	0.00150389	0.010901648	0.077374033	0.898499674	0.006925276	0.017201017	0	0.96025689	0.012331452	0.027411658	0	0.966712662	0.002833545	0.030453793	0.076017466	0.0088488	0	0	0.899613064	0.001419632	0.014101038
2. CVD Fall	1	Men	2007	41	0.987247402	0.003429058	0	0	0.00537848	0.000268348	0.003676712	0.979064453	0	0.013191919	0.002908629	0.004834999	0.966925739	0.015265552	0.007078327	0.010730382	0	0.987925867	0	0.001441278	0.010632855	0.095910557	0.880683413	0.006633309	0.016772722	0	0.961476573	0.0118051	0.026718327	0	0.967604847	0.002715208	0.029679944	0.080338773	0.005376278	0	0	0.899172792	0.001360539	0.013751617
2. CVD Fall	1	Men	2007	42	0.987921627	0.003913171	0	0	0.004320899	0.000257209	0.003587094	0.974241484	0	0.018254546	0.00278706	0.00471691	0.943625111	0.039130007	0.006779274	0.010465607	0	0.988248201	0	0.001381268	0.010370531	0.065269534	0.912022554	0.006353378	0.016354533	0	0.962658857	0.01130029	0.026040854	0	0.968474584	0.00260178	0.028923636	0.070878336	0.007783703	0	0	0.906623536	0.001303903	0.013410523
2. CVD Fall	1	Men	2007	43	0.987172271	0.003560375	0	0	0.005521134	0.000246534	0.003499686	0.974745959	0	0.017981789	0.002670532	0.004601721	0.956490653	0.026809608	0.006492537	0.010207201	0	0.988561728	0	0.001323753	0.010114519	0.09816903	0.879799792	0.006084984	0.015946194	0	0.963805065	0.010816122	0.025378813	0	0.969322553	0.002493057	0.028184389	0.089442116	0.006651659	0	0	0.889579056	0.001249622	0.013077546
2. CVD Fall	1	Men	2007	44	0.986791438	0.003915361	0	0	0.005642459	0.000236304	0.003414438	0.958341079	0	0.034610721	0.002558835	0.004489364	0.974200423	0.009626967	0.006217603	0.009955008	0	0.988866706	0	0.00126863	0.009864664	0.077160349	0.90146455	0.005827646	0.015547455	0	0.964916474	0.010351736	0.024731791	0	0.970149415	0.002388845	0.027461741	0.078773884	0.008266626	0	0	0.899009407	0.001197598	0.012752485
2. CVD Fall	1	Men	2007	45	0.984247585	0.00452547	0	0	0.00597864	0.000425656	0.004822648	0.965976014	0	0.023075936	0.004607546	0.006340505	0.968727827	0.006027691	0.011189151	0.01405533	0	0.983787334	0	0.002284817	0.013927849	0.060398332	0.907169618	0.010488038	0.021944012	0	0.946495195	0.018616649	0.034888156	0	0.956965452	0.004301569	0.038732979	0.066748909	0.009796333	0	0	0.903295758	0.002156912	0.018002088
2. CVD Fall	1	Men	2007	46	0.982903857	0.004913235	0	0	0.007069635	0.000408002	0.004705272	0.968917111	0	0.020482438	0.004414686	0.006185765	0.94117297	0.034405353	0.010714107	0.01370757	0	0.984227015	0	0.002189663	0.013583321	0.064604032	0.903959033	0.010043429	0.021393506	0	0.948193078	0.017813709	0.033993212	0	0.958145449	0.004121637	0.037732914	0.064530304	0.008690299	0	0	0.907158714	0.002067111	0.017553572
2. CVD Fall	1	Men	2007	47	0.984252803	0.004662066	0	0	0.006103237	0.000391084	0.004590811	0.972412686	0	0.017322642	0.004229825	0.006034847	0.961186007	0.015187239	0.010258591	0.013368163	0	0.984654458	0	0.00209847	0.013247072	0.073689086	0.895837939	0.009617113	0.020855863	0	0.949838215	0.017043491	0.033118294	0	0.959295878	0.00394917	0.036754952	0.077798879	0.011376384	0	0	0.89172801	0.001981047	0.01711568
2. CVD Fall	1	Men	2007	48	0.983623211	0.004871154	0	0	0.006651564	0.000374872	0.004479199	0.964060238	0	0.025999468	0.004052631	0.005887663	0.949348582	0.027792721	0.009821791	0.013036906	0	0.985070027	0	0.002011072	0.012918901	0.077686944	0.892773973	0.009208329	0.020330754	0	0.951432513	0.016304632	0.032262855	0	0.96041766	0.00378386	0.03579848	0.081800353	0.01147932	0	0	0.888133614	0.001898566	0.016688148
2. CVD Fall	1	Men	2007	49	0.982281102	0.005871567	0	0	0.007117621	0.000359337	0.004370372	0.965572525	0	0.024800559	0.003882787	0.005744129	0.944992076	0.03289139	0.00940293	0.012713604	0	0.985474072	0	0.001927314	0.012598614	0.064940978	0.906424809	0.008816351	0.019817863	0	0.952977803	0.015595831	0.031426366	0	0.961511686	0.00362541	0.034862905	0.08448648	0.01010677	0	0	0.88731651	0.001819521	0.016270719
2. CVD Fall	1	Men	2007	50	0.968550354	0.006323446	6.41E-05	0.009965299	0.00783585	0.000588409	0.006672579	0.940653594	0.025059695	0.019162859	0.006354655	0.008769197	0.931339413	0.033884163	0.015376367	0.019400057	0.007837904	0.955635794	0.014146358	0.003155205	0.019224738	0.067011028	0.888344187	0.01441841	0.030226374	0.074899961	0.851725316	0.025479909	0.047894814	0.076981159	0.863965098	0.005933654	0.053120089	0.076301482	0.011261116	0.00026156	0.022438013	0.861936953	0.002978785	0.024822091
2. CVD Fall	1	Men	2007	51	0.972537602	0.007312303	3.69E-05	0.004984161	0.008054266	0.000564046	0.006510722	0.95536129	0.006389769	0.023605204	0.006088098	0.008555639	0.962033675	0.004329777	0.014718378	0.018918169	0.009486699	0.957415781	0.011326359	0.003023802	0.018747359	0.074482182	0.8822545	0.013802708	0.02946061	0.03464342	0.894348285	0.024365489	0.046642807	0.120260775	0.822335401	0.00568499	0.051718834	0.077642058	0.011533132	1.01E-05	0.000866341	0.882894204	0.002854778	0.02419937
2. CVD Fall	1	Men	2007	52	0.977491586	0.006525786	7.41E-06	0.001126566	0.007955008	0.000540702	0.006352942	0.944972279	0.015640877	0.02520682	0.005832605	0.008347419	0.935538582	0.031926181	0.01408738	0.018447858	0.008163393	0.96017485	0.010482422	0.002897879	0.018281456	0.06051893	0.897556233	0.013212291	0.028712546	0.076278936	0.85500668	0.023296291	0.045418093	0.095224008	0.848981706	0.005446655	0.050347631	0.084015622	0.014543245	0.000113795	0.007650033	0.867350041	0.002735945	0.023591319
2. CVD Fall	1	Men	2007	53	0.972374977	0.007987002	2.87E-05	0.003550437	0.009341404	0.000518337	0.006199153	0.953674865	0.007796235	0.024796757	0.005587721	0.008144421	0.948840618	0.019688277	0.013482255	0.01798885	0.009538545	0.960146819	0.009710668	0.002777211	0.017826758	0.082090888	0.877281261	0.012646113	0.027981738	0.066870504	0.86663912	0.022270447	0.044219929	0.084208572	0.861567557	0.005218223	0.049005649	0.085350369	0.016009105	0.000242295	0.014666859	0.858111721	0.002622072	0.022997581
2. CVD Fall	1	Men	2007	54	0.973002681	0.008304924	2.23E-05	0.002655502	0.009468411	0.000496911	0.006049272	0.96210269	0.001912326	0.022685441	0.00535301	0.007946533	0.93836901	0.031188174	0.012901935	0.017540881	0.011911918	0.953935516	0.014107981	0.002661583	0.017383003	0.085810581	0.874818493	0.012103173	0.027267753	0.061302697	0.874363536	0.021286171	0.043047595	0.076193998	0.871114633	0.004999286	0.047692083	0.080562549	0.01473168	0	0	0.879775008	0.002512957	0.022417807
2. CVD Fall	1	Men	2007	55	0.961934646	0.008533986	8.16E-05	0.009394585	0.010038185	0.000757738	0.009259216	0.94995978	0.001623322	0.028098592	0.008156683	0.012161622	0.911311287	0.042224911	0.019636595	0.026827207	0.011069412	0.945861015	0.01242625	0.004057284	0.026586039	0.07607517	0.863826272	0.01842315	0.041675408	0.067861084	0.834062396	0.032355605	0.065720914	0.083617192	0.835976488	0.007618109	0.072788211	0.089982959	0.017136884	0	0	0.854774939	0.003830808	0.03427441
2. CVD Fall	1	Men	2007	56	0.961579553	0.008802453	7.18E-05	0.008017107	0.011766633	0.000726462	0.009036009	0.952763416	0.004464644	0.02309143	0.007813747	0.011866763	0.912563225	0.042491128	0.018787639	0.026158009	0.012022548	0.943904552	0.01426131	0.003888428	0.025923162	0.07343876	0.868325926	0.01762897	0.040606345	0.109257196	0.795868693	0.030914222	0.063959889	0.084602527	0.83728584	0.007298243	0.070813391	0.08866456	0.015733006	0.000671108	0.040239829	0.817612751	0.003671468	0.033407278
2. CVD Fall	1	Men	2007	57	0.957781762	0.008447368	0.000105787	0.012262392	0.011887621	0.000696504	0.008818566	0.945349838	0.012672179	0.02291347	0.007485083	0.011579431	0.918497616	0.038023954	0.017973465	0.025504964	0.01007081	0.941714218	0.019212025	0.003726646	0.025276301	0.05769838	0.885872485	0.016867375	0.03956176	0.072387231	0.8358454	0.029531162	0.062236207	0.07822986	0.845898843	0.006991698	0.068879599	0.074915373	0.017530343	0.000537981	0.029236827	0.84170015	0.003518805	0.032560521
2. CVD Fall	1	Men	2007	58	0.957209794	0.008892122	0.000103949	0.011450968	0.013068581	0.00066781	0.008606776	0.925300806	0.028881765	0.027347847	0.007170107	0.011299476	0.894923159	0.063016479	0.01719265	0.024867713	0.014743122	0.93873684	0.018303292	0.00357165	0.024645098	0.067510983	0.877810926	0.016137031	0.03854106	0.064807978	0.846439085	0.028204052	0.060548885	0.099134665	0.827181657	0.006697933	0.066985745	0.093217965	0.01954057	1.03E-05	0.000514293	0.851610707	0.003372548	0.031733662
2. CVD Fall	1	Men	2007	59	0.957310615	0.009545282	0.000101962	0.010467046	0.013534233	0.00064033	0.008400532	0.932114485	0.020457567	0.029532929	0.006868262	0.011026757	0.923902959	0.035407303	0.01644383	0.024245908	0.01365189	0.943438913	0.015456823	0.003423164	0.02402921	0.065073151	0.881946516	0.015436661	0.037543672	0.045577379	0.868595011	0.02693063	0.05889698	0.075884585	0.852568208	0.006416426	0.06513078	0.085994121	0.016857482	7.32E-05	0.004252886	0.858663586	0.003232438	0.030926243
2. CVD Fall	1	Men	2007	60	0.960817798	0.009431834	3.04E-05	0.003177544	0.012548216	0.001002158	0.012992096	0.92088501	0.022719092	0.028607492	0.010737887	0.017050519	0.886641902	0.050236284	0.025666576	0.037455239	0.010229383	0.926842846	0.020451771	0.005354936	0.037121065	0.076605461	0.841353945	0.024098646	0.057941949	0.052715031	0.814567833	0.041960295	0.090756841	0.08668201	0.802968116	0.010032255	0.10031762	0.095544039	0.017756232	0.000384432	0.020807312	0.812699265	0.005056743	0.047751977
2. CVD Fall	1	Men	2007	61	0.951263779	0.010223249	0.000103174	0.009888061	0.014878289	0.000961031	0.012682418	0.939858245	0.003271482	0.029944048	0.010285526	0.016640699	0.901493544	0.037446494	0.024542555	0.036517406	0.013425059	0.924573167	0.020676996	0.005132569	0.036192209	0.064020549	0.856499031	0.023047499	0.056432921	0.060817321	0.810888486	0.040046716	0.088247478	0.094669331	0.798223176	0.009610412	0.097497082	0.085277626	0.017857681	0	0	0.845485571	0.004846927	0.046532194
2. CVD Fall	1	Men	2007	62	0.951980905	0.009925665	8.72E-05	0.008624272	0.016079201	0.000921656	0.012381073	0.932543292	0.010037909	0.031324973	0.0098521	0.016241726	0.878059002	0.062873809	0.023464657	0.035602532	0.014382493	0.921277731	0.02413406	0.004919597	0.035286119	0.07430441	0.848697717	0.022039558	0.054958315	0.044478914	0.831520292	0.038210658	0.085790136	0.094383706	0.801676397	0.009206246	0.09473365	0.088790747	0.022527925	0.00041798	0.017797908	0.82047826	0.004645981	0.0453412
2. CVD Fall	1	Men	2007	63	0.946891403	0.011710201	0.000131902	0.011006495	0.017288108	0.000883963	0.012087927	0.925885611	0.015350874	0.033473247	0.009436848	0.01585342	0.900085429	0.042773388	0.022431028	0.034710155	0.014826061	0.919925405	0.026130553	0.004715642	0.034402339	0.068520482	0.85688907	0.021073085	0.053517363	0.042567388	0.837599963	0.036449062	0.083383587	0.077265333	0.821889633	0.008819049	0.092025986	0.088004627	0.022442553	0.000444403	0.018972882	0.821503606	0.004453548	0.044178381
2. CVD Fall	1	Men	2007	64	0.949024566	0.0118071	0.000120667	0.009995778	0.016401147	0.000847887	0.011802856	0.914399619	0.022213293	0.038872438	0.009039043	0.015475607	0.891245817	0.05347445	0.021439897	0.033839836	0.015747881	0.924438316	0.02175302	0.004520347	0.033540435	0.068741393	0.859002851	0.020146421	0.052109335	0.085564864	0.798649447	0.034759013	0.081026677	0.093854389	0.808324637	0.00844814	0.089372834	0.100037721	0.02358708	0.00042911	0.017438421	0.811195225	0.004269291	0.043043153
2. CVD Fall	1	Men	2007	65	0.940124943	0.012283695	0.000130617	0.010390862	0.017071523	0.001361257	0.018637103	0.91030325	0.015516208	0.035260556	0.01449017	0.024429816	0.845291645	0.067069986	0.034291719	0.05334665	0.01539188	0.901453393	0.023026482	0.007252406	0.052875839	0.070129421	0.815604035	0.032230501	0.082036044	0.067465214	0.749787484	0.055459906	0.127287396	0.08367636	0.762467415	0.013544379	0.140311846	0.093642148	0.023506119	0.000720605	0.029023622	0.778448818	0.006849928	0.067808761
2. CVD Fall	1	Men	2007	66	0.936126051	0.012586432	0.000150985	0.011702662	0.019926195	0.001305974	0.018201702	0.909341556	0.017459304	0.035467706	0.013879365	0.02385207	0.849043128	0.066181319	0.032766846	0.052008707	0.017365842	0.892098964	0.032031409	0.006952851	0.051550934	0.078080879	0.811251647	0.030805034	0.07986244	0.065420662	0.75809046	0.052857187	0.123631691	0.079282127	0.77155042	0.012974944	0.13619251	0.099190003	0.023866357	0	0	0.804316634	0.006567321	0.066059685
2. CVD Fall	1	Men	2007	67	0.933245826	0.014326035	0.00018881	0.012819227	0.020388177	0.001253091	0.017778834	0.913561624	0.013280417	0.036572959	0.013294431	0.023290569	0.866333613	0.051656851	0.031305003	0.050704533	0.017887412	0.892850445	0.032336471	0.006666148	0.050259524	0.065107949	0.827714553	0.029438597	0.077738901	0.053048239	0.776539425	0.050360945	0.120051391	0.086469979	0.768944218	0.012429664	0.132156139	0.093854444	0.023943525	0.000596308	0.023703291	0.787252905	0.006296847	0.064352679
2. CVD Fall	1	Men	2007	68	0.931010245	0.014315676	0.000200711	0.013625771	0.022276721	0.001202516	0.017368358	0.898175907	0.025690734	0.040653887	0.012734359	0.022745114	0.85676349	0.063899199	0.02990374	0.049433571	0.02002285	0.891123503	0.033460792	0.006391798	0.049001057	0.067539518	0.828667096	0.02812889	0.075664495	0.064309814	0.771177859	0.047967187	0.116545141	0.081463732	0.778427347	0.011907599	0.128201322	0.093825743	0.024343295	0.000509826	0.020003736	0.792592367	0.006038038	0.062686996
2. CVD Fall	1	Men	2007	69	0.931941536	0.013467873	0.00020766	0.014977093	0.021281529	0.001154163	0.016970147	0.901815931	0.019601362	0.044169003	0.012198184	0.02221552	0.854116555	0.069127419	0.028560722	0.048195304	0.019949552	0.888198469	0.037947626	0.006129329	0.047775024	0.079321016	0.820166901	0.026873724	0.073638359	0.061737763	0.779478399	0.045672119	0.113111719	0.054378197	0.80988714	0.011407849	0.124326815	0.105819145	0.027805212	0	0	0.799523259	0.005790446	0.061061938
2. CVD Fall	1	Men	2007	70	0.915693523	0.014714329	0.000252626	0.016626305	0.024070652	0.001914463	0.026728102	0.880389638	0.021175294	0.043268258	0.020190916	0.034975894	0.800947341	0.076194154	0.04712726	0.075731245	0.022949388	0.852278117	0.039541998	0.010157304	0.075073194	0.069114063	0.771036182	0.044357867	0.115491888	0.038183389	0.709818507	0.075117083	0.176881021	0.084444811	0.702412364	0.018885579	0.194257246	0.096731028	0.026655386	0.000572583	0.02045665	0.750130847	0.009596343	0.095857163
2. CVD Fall	1	Men	2007	71	0.910490184	0.015364006	0.000315643	0.019815108	0.026051556	0.001838162	0.02612534	0.880666847	0.026638201	0.039179859	0.019342347	0.034172746	0.819852933	0.06131178	0.044996568	0.073838718	0.015843153	0.863522155	0.037692604	0.009742523	0.073199564	0.068416113	0.776838753	0.042366862	0.112378273	0.047543495	0.70940519	0.071474067	0.171577249	0.071093934	0.722544509	0.018094794	0.188266763	0.091838396	0.028753744	0	0	0.776836722	0.00920511	0.093366029
2. CVD Fall	1	Men	2007	72	0.911214331	0.016363872	0.00032448	0.01911905	0.025671086	0.001765289	0.025541891	0.87833359	0.026468419	0.043272967	0.018530539	0.033394485	0.825658086	0.059389577	0.042955555	0.071996783	0.022387925	0.855176911	0.041712996	0.00934604	0.071376128	0.0651247	0.785076562	0.0404598	0.109338937	0.062422423	0.703207374	0.067983857	0.166386345	0.067503389	0.732756911	0.01733834	0.182401359	0.108793129	0.031416797	0	0	0.760021401	0.008831154	0.090937518
2. CVD Fall	1	Men	2007	73	0.901508543	0.016894707	0.00045645	0.025850145	0.028616774	0.001695721	0.024977661	0.869867082	0.037453946	0.042283894	0.017754125	0.032640953	0.808220953	0.080573259	0.041000918	0.07020487	0.021258275	0.856031146	0.044141074	0.008967181	0.069602324	0.071378192	0.783615291	0.038633581	0.106372936	0.055079124	0.718972447	0.064641145	0.161307284	0.076059375	0.730665529	0.01661494	0.176660156	0.098896602	0.033370402	0.000994748	0.027951676	0.741741875	0.008473844	0.088570853
2. CVD Fall	1	Men	2007	74	0.905524344	0.017994205	0.000363114	0.019417241	0.030639171	0.001629339	0.024432585	0.868863624	0.037023464	0.045189076	0.017011803	0.031912033	0.832289841	0.060118156	0.039129522	0.068462481	0.02832798	0.856538527	0.038650523	0.008605312	0.067877659	0.074732975	0.784902329	0.036885257	0.103479439	0.059094016	0.723125807	0.061440898	0.156339279	0.074783921	0.738250141	0.015923382	0.171042556	0.100149442	0.030315306	0.002911974	0.084726073	0.68749928	0.008132576	0.086265348
2. CVD Fall	1	Men	2007	75	0.875128546	0.018171371	0.000550217	0.0288392	0.034130325	0.002830599	0.040349742	0.852293115	0.022552574	0.043015494	0.029466389	0.052672427	0.736810964	0.083006703	0.067488931	0.112693403	0.028424139	0.791802877	0.053107782	0.014929589	0.111735614	0.065210759	0.701253005	0.063645548	0.169890687	0.03781524	0.600994421	0.105518533	0.255671805	0.072001092	0.620998738	0.02758691	0.279413261	0.107110136	0.034639062	0.000679786	0.01856734	0.683082851	0.014110716	0.141810108
2. CVD Fall	1	Men	2007	76	0.879744833	0.021543811	0.000516437	0.022893872	0.033085201	0.00272155	0.039494296	0.826959902	0.044389201	0.048884715	0.028241314	0.051524867	0.757246596	0.06844427	0.064391438	0.109917696	0.028469666	0.797188016	0.05102006	0.014333704	0.108988554	0.062292596	0.711706902	0.060752138	0.165248363	0.05168485	0.600432151	0.100223691	0.247659309	0.080502945	0.622703181	0.026445894	0.27034798	0.102909089	0.040653392	0.000136677	0.003214062	0.701415498	0.013548839	0.138122442
2. CVD Fall	1	Men	2007	77	0.867040868	0.021457066	0.000710372	0.031335382	0.038167452	0.002617697	0.038671162	0.822541608	0.051100903	0.048867367	0.027071505	0.050418617	0.754760637	0.076586552	0.06142907	0.107223742	0.021681854	0.802918949	0.055311152	0.01376542	0.106322625	0.076006516	0.705282979	0.057985112	0.160725393	0.059908027	0.605097484	0.095161794	0.239832695	0.074995386	0.638156969	0.025356506	0.261491138	0.1004845	0.039953411	0	0	0.712013625	0.013013032	0.134535432
2. CVD Fall	1	Men	2007	78	0.873615827	0.021302276	0.000635459	0.028331024	0.035716094	0.002518874	0.037880447	0.845491926	0.028660001	0.050539281	0.025955061	0.049353731	0.758947228	0.077844382	0.058597231	0.104611158	0.031540324	0.786826729	0.064671681	0.013223812	0.103737453	0.066846439	0.721492252	0.05534015	0.156321159	0.062731836	0.614750468	0.090325476	0.232192219	0.073479692	0.649359764	0.024316973	0.252843572	0.113912735	0.046235982	0	0	0.696300339	0.012502425	0.131048519
2. CVD Fall	1	Men	2007	79	0.861490091	0.023539504	0.000856074	0.034235305	0.040331793	0.002424923	0.03712231	0.825656579	0.050668401	0.050454508	0.024890182	0.04833033	0.750469861	0.091558896	0.055891565	0.102079678	0.032537944	0.799279238	0.054242033	0.01270801	0.101232775	0.075666332	0.71948528	0.052813155	0.152035233	0.063066834	0.626486935	0.085707732	0.224738499	0.048242027	0.684025837	0.023325616	0.24440652	0.107333126	0.041134015	0.003888938	0.08248784	0.625478589	0.012016196	0.127661295
2. CVD Fall	1	Men	2007	80	0.826667305	0.027833679	0.001239961	0.041409027	0.036847104	0.00417216	0.061830763	0.778011597	0.05223755	0.046668398	0.04264718	0.080435274	0.646203241	0.089326225	0.095221672	0.169248861	0.033980891	0.725281671	0.051059733	0.021823044	0.167854661	0.075341314	0.583435492	0.090027783	0.251195411	0.046391503	0.438942631	0.145226064	0.369439803	0.063631099	0.495168325	0.039977952	0.401222625	0.112015386	0.05502094	0	0	0.601041745	0.020637651	0.211284278
2. CVD Fall	1	Men	2007	81	0.821714618	0.030147662	0.001345528	0.041378868	0.040737584	0.004020985	0.060654755	0.763509796	0.058938422	0.057792721	0.040920296	0.078838765	0.650402373	0.093556649	0.090817636	0.165223342	0.044355112	0.70070232	0.070080366	0.020989569	0.163872633	0.080172	0.589597574	0.0859149	0.244315526	0.047395271	0.457464094	0.137723232	0.357417403	0.060936075	0.513079135	0.038370911	0.387613878	0.10516946	0.043941146	0.001420292	0.029890266	0.593859019	0.019852158	0.205867659
2. CVD Fall	1	Men	2007	82	0.809129232	0.026863075	0.001412528	0.048543178	0.050638689	0.003877785	0.059535512	0.785093788	0.042934077	0.055381195	0.039276895	0.077314045	0.663278645	0.088768092	0.086617934	0.161335329	0.036303101	0.708036404	0.075435337	0.020198057	0.160027102	0.070521739	0.60984906	0.081992968	0.237636233	0.043138985	0.480565748	0.130576646	0.345718621	0.055814293	0.532971236	0.036841901	0.37437257	0.114635557	0.057035614	0.002784496	0.043763323	0.562054988	0.019106321	0.200619701
2. CVD Fall	1	Men	2007	83	0.822214965	0.030692295	0.001229057	0.037273607	0.046374009	0.003742354	0.058473711	0.752416577	0.071626579	0.062380638	0.037714423	0.075861783	0.647182264	0.112616421	0.082616244	0.157585071	0.042471158	0.703098726	0.078664499	0.019447299	0.156318319	0.074068978	0.616517027	0.078256051	0.231157944	0.052507318	0.489370385	0.123775852	0.334346445	0.066769666	0.536338931	0.035388544	0.361502859	0.120488283	0.044762728	0.008976566	0.158062576	0.453770242	0.018399006	0.195540599
2. CVD Fall	1	Men	2007	84	0.819929485	0.035027098	0.001007658	0.026955838	0.055995284	0.003614501	0.057470136	0.759863403	0.07204886	0.057374504	0.03623047	0.074482762	0.659748222	0.107472267	0.078806548	0.153972963	0.040973854	0.689866693	0.097676596	0.01873617	0.152746687	0.077798364	0.622621838	0.074698505	0.224881293	0.046874257	0.512510803	0.117310773	0.323304167	0.061594706	0.555387516	0.034008603	0.349009175	0.108900862	0.048592618	0.006889488	0.117285468	0.509971675	0.017729155	0.190630734
2. CVD Fall	1	Men	2007	85	0.815147131	0.036507533	0.000975708	0.025054803	0.052770351	0.004174345	0.065370129	0.748250831	0.082511551	0.043006985	0.041602764	0.084627869	0.632300316	0.103830535	0.089821263	0.174047886	0.038856293	0.678421936	0.088465765	0.021580614	0.172675392	0.080453091	0.581303519	0.085199982	0.253043408	0.045118937	0.46055784	0.132816794	0.361506429	0.077787153	0.493536643	0.039066661	0.389609543	0.121497121	0.049510526	0.011844181	0.181200199	0.400547067	0.020424336	0.21497657
2. CVD Fall	1	Men	2007	86	0.730827821	0.041981581	0.004790011	0.097622818	0.056391268	0.004039106	0.064347396	0.701517432	0.114830414	0.060436917	0.040009525	0.083205711	0.623672727	0.120426873	0.085708297	0.170192102	0.05812926	0.653452084	0.098732486	0.020822057	0.168864114	0.096424255	0.575962248	0.08135939	0.246254107	0.036861115	0.487766669	0.125860504	0.349511712	0.068234144	0.518133107	0.037586073	0.376046677	0.109044052	0.073896729	0.006654485	0.075957363	0.505045295	0.019710147	0.209691931
2. CVD Fall	1	Men	2007	87	0.743436888	0.032116507	0.003387228	0.092017617	0.061733963	0.003912361	0.063395436	0.725137479	0.096234697	0.058253663	0.038502429	0.081871732	0.637765429	0.113931267	0.081805009	0.166498295	0.031173229	0.678512529	0.104993213	0.020107362	0.165213666	0.078921183	0.603662778	0.077714664	0.239701375	0.034910442	0.507907357	0.119271265	0.337910936	0.052473616	0.548405757	0.036186093	0.362934533	0.113377276	0.028792075	0.033827863	0.506381279	0.093978745	0.019037452	0.20460531
2. CVD Fall	1	Men	2007	88	0.766419636	0.029643748	0.002728458	0.081555497	0.053343067	0.003793965	0.062515629	0.743738009	0.068067179	0.070488274	0.037079213	0.080627325	0.620108519	0.138818735	0.078105352	0.162967393	0.035162154	0.654414844	0.129262476	0.019435543	0.161724983	0.060789139	0.631564127	0.074260166	0.233386568	0.050202104	0.510051508	0.113038225	0.326708163	0.068734394	0.546122926	0.034864635	0.350278045	0.107641186	0.044613153	0.01564533	0.243991641	0.369985675	0.018405329	0.199717686
2. CVD Fall	1	Men	2007	89	0.774822434	0.038870852	0.002364022	0.054966636	0.063582793	0.003683792	0.06170947	0.686650362	0.124996734	0.073141169	0.035737744	0.07947399	0.635871235	0.129924905	0.074603486	0.159600374	0.052265279	0.66294256	0.107587423	0.018805693	0.158399045	0.068096165	0.633602317	0.070990459	0.227311058	0.051892325	0.525049803	0.107150682	0.315907189	0.066340555	0.561958011	0.033619734	0.3380817	0.122278356	0.062008211	0.013921829	0.169428916	0.419519683	0.017812935	0.19503007
2. CVD Fall	1	Men	2007	90	0.6688467	0.039928804	0.004210828	0.091187062	0.076778299	0.006283641	0.112764667	0.619740284	0.096900858	0.077869773	0.060483175	0.14500591	0.440995971	0.144709886	0.125074559	0.289219584	0.063732195	0.51115559	0.106081249	0.031959066	0.2870719	0.065891004	0.405422726	0.119121222	0.409565049	0.051031631	0.205762017	0.178239057	0.564967295	0.070304494	0.269265548	0.056928026	0.603501932	0.129625176	0.046604575	0.033601698	0.385339322	0.022187236	0.0302793	0.352362694
2. CVD Fall	1	Men	2007	91	0.685551813	0.036669627	0.003320563	0.079713873	0.0770701	0.006118694	0.11155533	0.593448582	0.143811567	0.061114747	0.058406196	0.143218908	0.485729192	0.111070685	0.119595463	0.28360466	0.045462593	0.492408902	0.149602612	0.030997123	0.281528771	0.077597882	0.409174081	0.114005935	0.399222102	0.048763332	0.23567243	0.169066774	0.546497464	0.055330808	0.306996318	0.055003103	0.582669771	0.147540297	0.067883525	0.009951954	0.117906884	0.282902571	0.029375514	0.344439256
2. CVD Fall	1	Men	2007	92	0.633259649	0.041151857	0.006473815	0.129457397	0.073197944	0.005967728	0.11049161	0.572018542	0.155700686	0.074208609	0.056462599	0.141609564	0.484936148	0.122331584	0.11443424	0.278298028	0.061447052	0.493412387	0.138743851	0.030104845	0.276291865	0.06404084	0.437443025	0.109187852	0.389328283	0.049639816	0.261128891	0.16044505	0.528786243	0.05303216	0.331059008	0.0532033	0.562705532	0.128674167	0.077550518	0	0	0.428346806	0.028537759	0.33689075
2. CVD Fall	1	Men	2007	93	0.663195062	0.049889838	0.005862341	0.09928765	0.066357468	0.005830667	0.109576974	0.597981562	0.134001072	0.073186824	0.05464937	0.140181172	0.445843923	0.17127343	0.109581542	0.273301104	0.058077263	0.515092439	0.126186524	0.029281154	0.27136262	0.070555599	0.44490103	0.10465835	0.379885021	0.046021256	0.289787177	0.152355381	0.511836186	0.068128983	0.336733793	0.051525876	0.543611348	0.13317999	0.066964324	0.014120937	0.160028305	0.268223052	0.027765051	0.329718342
2. CVD Fall	1	Men	2007	94	0.623059302	0.056781113	0.007185985	0.105152783	0.093298328	0.005707471	0.108815016	0.525012641	0.205098078	0.077988582	0.052963626	0.138937074	0.514562357	0.111794525	0.105028116	0.268615001	0.073870987	0.485256406	0.145605355	0.028525081	0.266742171	0.060772317	0.467925633	0.100408909	0.370893141	0.037444932	0.322127722	0.144779192	0.495648154	0.05735881	0.367285783	0.049968219	0.525387189	0.121125498	0.05858873	0.008859408	0.122491998	0.338955095	0.027056511	0.32292276
2. CVD Fall	1	Men	2007	95	0.642778303	0.050730497	0.005998078	0.099734837	0.086950719	0.005598137	0.10820943	0.627761261	0.111104717	0.071850821	0.05140259	0.137880611	0.483958913	0.151035895	0.100764759	0.264240432	0.088383058	0.450025453	0.171324467	0.027835764	0.262431258	0.060490585	0.480725614	0.096431072	0.362352729	0.04680292	0.335278152	0.137697799	0.48022113	0.039927558	0.403513936	0.048527825	0.508030681	0.126361721	0.069275829	0.028871967	0.265296295	0.167278644	0.026411363	0.316504182
2. CVD Fall	1	Men	2007	96	0.58257839	0.050338823	0.008984873	0.142470177	0.102361065	0.0055027	0.107763972	0.506772606	0.225174559	0.081074185	0.049963572	0.137015078	0.454292657	0.188747449	0.096782276	0.260177618	0.083662025	0.460378505	0.170316904	0.027212428	0.258430137	0.060924956	0.492095634	0.092716403	0.354263007	0.026823143	0.376532401	0.131092394	0.465552063	0.057822122	0.403438638	0.047202279	0.491536962	0.112761788	0.056281368	0.052740288	0.43101945	0.010906059	0.025828921	0.310462127
2. CVD Fall	1	Men	2007	97	0.578843017	0.049688544	0.008739302	0.140834956	0.108990521	0.005421232	0.107482429	0.459157804	0.269257903	0.086596684	0.048643944	0.136343665	0.490943734	0.159558626	0.093071442	0.256426198	0.097488181	0.482576658	0.138542289	0.026654386	0.254738486	0.070863052	0.493258283	0.089256447	0.346622218	0.026676097	0.396744118	0.124944039	0.451635746	0.04975828	0.428353914	0.045989231	0.475898575	0.126341756	0.116538783	0.010211738	0.070353909	0.346449873	0.025308585	0.304795356
2. CVD Fall	1	Men	2007	98	0.486160586	0.049887514	0.014538619	0.211124765	0.125566098	0.005353844	0.107368573	0.418099341	0.326600436	0.071989712	0.047441114	0.135869398	0.547040477	0.11035141	0.089622977	0.252985135	0.088384	0.488002123	0.146097543	0.026161022	0.251355312	0.066366302	0.508163469	0.086042703	0.339427526	0.049244372	0.393057221	0.119233674	0.438464733	0.041859251	0.452148948	0.044886373	0.461105428	0.134427551	0.071730505	0.044938323	0.340240167	0.084311854	0.024849827	0.299501773
2. CVD Fall	1	Men	2007	99	0.581342494	0.052769662	0.007868914	0.121898553	0.123393579	0.005300687	0.10742611	0.438028603	0.281987554	0.098036264	0.046352505	0.135595074	0.486812307	0.176907543	0.086427515	0.249852636	0.090588844	0.506801665	0.128598837	0.025731782	0.248278872	0.074338979	0.509919506	0.083066595	0.33267492	0.050409877	0.409618683	0.113942142	0.426029298	0.072049848	0.436913956	0.043891417	0.447144779	0.116943665	0.110704069	0.004891132	0.037421453	0.411009161	0.024452184	0.294578337
2. CVD Fall	1	Men	2007	100	0.37396889	0.051388255	0.025437054	0.305665474	0.130619746	0.005261949	0.107658631	0.447559226	0.270096547	0.101445508	0.04537553	0.135523188	0.495951332	0.173547013	0.08347559	0.247026064	0.114086312	0.438299367	0.176741571	0.025366163	0.245506586	0.06081095	0.532510446	0.080319452	0.326359152	0.038230262	0.438402086	0.109050217	0.414317435	0.059306589	0.463690049	0.043002072	0.43400129	0.117939883	0.097675749	0.013608325	0.108676242	0.347963566	0.024115246	0.290020989
2. CVD Fall	1	Men	2008	35	0.990749566	0.002823555	0	0	0.003113834	0.000184944	0.003128101	0.981014768	0	0.012863246	0.002007456	0.00411453	0.965957675	0.020003687	0.004896207	0.009142431	0	0.989946895	0	0.000993949	0.009059156	0.040154371	0.940950095	0.004587283	0.01430825	0	0.968974438	0.008186583	0.022838978	0	0.972740236	0.001873768	0.025385996	0.067008055	0.005131992	0	0	0.915197923	0.000938228	0.011723802
2. CVD Fall	1	Men	2008	36	0.99151298	0.00233118	0	0	0.002926807	0.000177263	0.003051771	0.970418292	0	0.02364401	0.001923699	0.004013999	0.963956955	0.022435001	0.004690466	0.008917578	0	0.990211042	0	0.000952582	0.008836376	0.060724474	0.920926882	0.004394669	0.013953975	0	0.969892965	0.007839806	0.02226723	0	0.973455973	0.001795615	0.024748412	0.080636751	0.005729346	0	0	0.901300226	0.000899186	0.01143449
2. CVD Fall	1	Men	2008	37	0.989988707	0.003680498	0	0	0.003183582	0.000169901	0.002977313	0.974216985	0	0.020023671	0.001843416	0.003915927	0.98231087	0.004497761	0.004493218	0.00869815	0	0.990468095	0	0.000912934	0.008618971	0.094389678	0.887792182	0.004210011	0.013608129	0	0.970783941	0.007507272	0.021708786	0	0.974153727	0.001720704	0.024125569	0.072223124	0.004408656	0	0	0.911354344	0.000861766	0.01115211
2. CVD Fall	1	Men	2008	38	0.990102211	0.003691536	0	0	0.003138726	0.000162845	0.002904681	0.96807307	0	0.026340212	0.001766463	0.003820255	0.95189799	0.035313887	0.004304111	0.008484012	0	0.990718257	0	0.000874934	0.008406809	0.09135525	0.891341274	0.004032977	0.0132705	0	0.971648313	0.007188389	0.021163298	0	0.974834025	0.001648901	0.023517074	0.07896948	0.007382825	0	0	0.901945305	0.000825901	0.010876488
2. CVD Fall	1	Men	2008	39	0.989287064	0.003550736	0	0	0.004172284	0.000156083	0.002833834	0.98130896	0	0.013271415	0.001692701	0.003726924	0.964964588	0.022637573	0.004122804	0.008275034	0	0.990961726	0	0.000838513	0.008199761	0.079816579	0.903379292	0.00386325	0.012940879	0	0.97248699	0.006882587	0.020630423	0	0.975497378	0.001580076	0.022922546	0.06159259	0.008034718	0	0	0.91897371	0.000791527	0.010607455
2. CVD Fall	1	Men	2008	40	0.990149082	0.003070618	0	0	0.002755016	0.000272005	0.003753278	0.976264369	0	0.015850613	0.002949099	0.004935919	0.964391078	0.017471967	0.00717998	0.010956975	0	0.987681549	0	0.001461105	0.010857346	0.077374033	0.898766599	0.006728254	0.017131115	0	0.960719114	0.011980625	0.027300261	0	0.966917036	0.002752931	0.030330033	0.076017466	0.00923193	0	0	0.899327627	0.001379244	0.014043733
2. CVD Fall	1	Men	2008	41	0.987118824	0.003580213	0	0	0.00537848	0.000260713	0.00366177	0.979166851	0	0.013191919	0.002825879	0.004815351	0.967170723	0.015265552	0.00687695	0.010686775	0	0.988010082	0	0.001400274	0.010589644	0.095910557	0.880940291	0.006444593	0.01670456	0	0.961921005	0.011469247	0.026609748	0	0.967802709	0.002637961	0.02955933	0.080338773	0.005613268	0	0	0.899030394	0.001321832	0.013695733
2. CVD Fall	1	Men	2008	42	0.987765876	0.004090817	0	0	0.004320899	0.000249891	0.003572517	0.974339944	0	0.018254546	0.002707769	0.004697741	0.943860511	0.039130007	0.006586405	0.010423077	0	0.988329642	0	0.001341971	0.010328387	0.065269534	0.912269769	0.006172626	0.016288071	0	0.963086174	0.010978799	0.025935028	0	0.968666145	0.00252776	0.028806094	0.070878336	0.008137058	0	0	0.906361774	0.001266807	0.013356025
2. CVD Fall	1	Men	2008	43	0.987025745	0.003728137	0	0	0.005521134	0.00023952	0.003485464	0.974840635	0	0.017981789	0.002594556	0.00458302	0.956716845	0.026809608	0.006307826	0.010165721	0	0.988640492	0	0.001286092	0.010073415	0.09816903	0.880037711	0.005911867	0.015881391	0	0.964215917	0.010508405	0.025275678	0	0.969508017	0.00242213	0.028069852	0.089442116	0.00696508	0	0	0.889354332	0.00121407	0.013024401
2. CVD Fall	1	Men	2008	44	0.986623189	0.004104209	0	0	0.005642459	0.000229581	0.003400562	0.958432121	0	0.034610721	0.002486037	0.00447112	0.974417768	0.009626967	0.006040713	0.009914552	0	0.988942887	0	0.001232537	0.009824576	0.077160349	0.901693528	0.00566185	0.015484272	0	0.965311485	0.010057231	0.024631284	0	0.970328977	0.002320882	0.027350141	0.078773884	0.008665346	0	0	0.898696583	0.001163526	0.012700661
2. CVD Fall	1	Men	2008	45	0.984128271	0.004740825	0	0	0.00597864	0.000406954	0.004745311	0.96628014	0	0.023075936	0.004405097	0.006238826	0.969444857	0.006027691	0.010697518	0.013829934	0	0.984111077	0	0.002184426	0.013704497	0.060398332	0.907982348	0.010027211	0.021592109	0	0.94787266	0.017798664	0.034328676	0	0.957775592	0.004112565	0.038111843	0.066748909	0.010262514	0	0	0.903213037	0.002062141	0.0177134
2. CVD Fall	1	Men	2008	46	0.982780487	0.005129987	0	0	0.007069635	0.000390075	0.004629817	0.969210282	0	0.020482438	0.004220712	0.006086568	0.94186355	0.034405353	0.010243347	0.013487751	0	0.984541053	0	0.002093453	0.013365494	0.064604032	0.904743399	0.009602137	0.021050432	0	0.949520911	0.017031004	0.033448085	0	0.958931646	0.003940539	0.037127815	0.064530304	0.00907368	0	0	0.907147654	0.001976285	0.017272077
2. CVD Fall	1	Men	2008	47	0.98417204	0.004833632	0	0	0.006103237	0.0003739	0.004517191	0.972695315	0	0.017322642	0.004043973	0.00593807	0.96185113	0.015187239	0.009807845	0.013153786	0	0.984959097	0	0.002006266	0.013034637	0.073689086	0.896594951	0.009194552	0.02052141	0	0.951118176	0.016294628	0.032587196	0	0.960058815	0.00377565	0.036165536	0.077798879	0.011795041	0	0	0.891670871	0.001894003	0.016841207
2. CVD Fall	1	Men	2008	48	0.983589342	0.004993325	0	0	0.006651564	0.000358401	0.004407369	0.964332721	0	0.025999468	0.003874565	0.005793246	0.9499892	0.027792721	0.009390238	0.012827842	0	0.985365563	0	0.001922709	0.012711729	0.077686944	0.893504603	0.00880373	0.020004723	0	0.952666291	0.015588233	0.031745476	0	0.961157995	0.003617603	0.035224402	0.081800353	0.011767226	0	0	0.888196744	0.001815146	0.01642053
2. CVD Fall	1	Men	2008	49	0.98230739	0.005931153	0	0	0.007117621	0.000343549	0.004300287	0.965835243	0	0.024800559	0.003712184	0.005652014	0.945609106	0.03289139	0.008989781	0.012509724	0	0.985760791	0	0.001842631	0.012396578	0.064940978	0.907129992	0.008428975	0.019500056	0	0.954167024	0.014910575	0.030922401	0	0.962230055	0.003466115	0.03430383	0.08448648	0.010209335	0	0	0.887554815	0.001739574	0.016009795
2. CVD Fall	1	Men	2008	50	0.96903794	0.006284603	6.19E-05	0.009696635	0.00783585	0.000563617	0.006519422	0.941799239	0.024383083	0.019162859	0.006086904	0.008567915	0.932432586	0.033884163	0.014728489	0.018954762	0.007787628	0.956260285	0.014146358	0.003022262	0.018783467	0.067011028	0.889645496	0.013810896	0.02953258	0.074899961	0.853898246	0.024406322	0.046795471	0.076981159	0.865434391	0.005683641	0.051900808	0.076301482	0.011195898	0.000252865	0.021833819	0.863310318	0.002853275	0.024252343
2. CVD Fall	1	Men	2008	51	0.973013966	0.007144717	3.51E-05	0.004850416	0.008054266	0.00054028	0.006361279	0.955986714	0.006217245	0.023605204	0.005831578	0.008359259	0.963088063	0.004329777	0.014098225	0.018483935	0.009268016	0.958192184	0.011326359	0.002896395	0.018317046	0.074482182	0.88351229	0.013221136	0.028784392	0.03464342	0.896445522	0.023338857	0.045572201	0.120260775	0.823762053	0.005445455	0.050531716	0.077642058	0.011267542	9.62E-06	0.000843177	0.883859198	0.002734493	0.023643915
2. CVD Fall	1	Men	2008	52	0.977940022	0.006276571	6.93E-06	0.001096425	0.007955008	0.00051792	0.006207121	0.945831938	0.015218574	0.02520682	0.00558685	0.008155819	0.936555587	0.031926181	0.013493813	0.018024419	0.007851398	0.961028566	0.010482422	0.002775778	0.017861836	0.06051893	0.898771975	0.012655596	0.028053499	0.076278936	0.857030756	0.02231471	0.044375598	0.095224008	0.850366843	0.005217162	0.049191987	0.084015622	0.013990375	0.000106491	0.007447714	0.868769312	0.002620667	0.023049821
2. CVD Fall	1	Men	2008	53	0.973039813	0.007582934	2.65E-05	0.00345599	0.009341404	0.000496497	0.006056862	0.954307741	0.007585737	0.024796757	0.005352284	0.00795748	0.949821592	0.019688277	0.012914185	0.017575946	0.009055104	0.961156459	0.009710668	0.002660194	0.017417575	0.082090888	0.878456374	0.012113273	0.027339465	0.066870504	0.86859247	0.021332089	0.043204936	0.084208572	0.862912265	0.004998355	0.047880808	0.085350369	0.015203929	0.000223804	0.014282802	0.859957794	0.002511592	0.02246971
2. CVD Fall	1	Men	2008	54	0.973735812	0.007803881	2.04E-05	0.002585114	0.009468411	0.000475974	0.005910421	0.962562269	0.001860693	0.022685441	0.005127463	0.007764134	0.939315249	0.031188174	0.012358317	0.01713826	0.01119245	0.955166125	0.014107981	0.002549438	0.016984006	0.085810581	0.875954341	0.01159321	0.026641869	0.061302697	0.876248505	0.020389286	0.042059512	0.076193998	0.872419966	0.004788643	0.046597393	0.080562549	0.013841902	0	0	0.881285231	0.002407074	0.021903245
2. CVD Fall	1	Men	2008	55	0.962892914	0.0079589	7.41E-05	0.009146304	0.010038185	0.000729081	0.009160549	0.950441678	0.001579493	0.028098592	0.007848212	0.012032026	0.912339784	0.042224911	0.018893973	0.026541332	0.010320804	0.947046367	0.01242625	0.003903845	0.026302734	0.07607517	0.864967103	0.017726418	0.041231309	0.067861084	0.835986361	0.031131972	0.065020582	0.083617192	0.837040234	0.007330005	0.072012569	0.089982959	0.015977941	0	0	0.85644399	0.003685934	0.033909176
2. CVD Fall	1	Men	2008	56	0.962559335	0.008164834	6.48E-05	0.007805718	0.011766633	0.000698988	0.00893972	0.953305918	0.004344098	0.02309143	0.007518245	0.011740309	0.913552484	0.042491128	0.018077123	0.025879265	0.011149222	0.945201173	0.01426131	0.003741375	0.025646921	0.07343876	0.86942533	0.016962272	0.040173637	0.109257196	0.797719381	0.0297451	0.063278323	0.084602527	0.838316445	0.007022236	0.070058792	0.08866456	0.014606953	0.000605554	0.039200787	0.820338241	0.003532619	0.033051285
2. CVD Fall	1	Men	2008	57	0.958872894	0.007810489	9.51E-05	0.0119391	0.011887621	0.000670163	0.008724594	0.946098452	0.01233003	0.02291347	0.00720201	0.011456039	0.919449127	0.038023954	0.01729374	0.025233179	0.009308387	0.942886925	0.019212025	0.003585711	0.025006953	0.05769838	0.886931956	0.01622948	0.039140184	0.072387231	0.837625416	0.028414344	0.061573009	0.07822986	0.846897248	0.006727284	0.068145608	0.074915373	0.016216612	0.000483827	0.028487062	0.844297846	0.00338573	0.032213551
2. CVD Fall	1	Men	2008	58	0.958322158	0.008208712	9.33E-05	0.011149595	0.013068581	0.000642555	0.008515061	0.926472183	0.028101957	0.027347847	0.006898946	0.011179067	0.895838349	0.063016479	0.016542453	0.024602719	0.013605734	0.940271922	0.018303292	0.003436576	0.024382476	0.067510983	0.8788319	0.015526756	0.038130361	0.064807978	0.848150931	0.027137424	0.059903667	0.099134665	0.828148772	0.006444629	0.066271935	0.093217965	0.018033329	9.21E-06	0.000501177	0.853597813	0.003245004	0.031395503
2. CVD Fall	1	Men	2008	59	0.958446796	0.008808198	9.15E-05	0.010192123	0.013534233	0.000616114	0.008311015	0.933044088	0.019905213	0.029532929	0.006608516	0.010909254	0.924783205	0.035407303	0.015821953	0.02398754	0.012594062	0.944882258	0.015456823	0.003293706	0.023773151	0.065073151	0.882930375	0.014852873	0.037143601	0.045577379	0.870241096	0.02591216	0.058269365	0.075884585	0.85350491	0.006173768	0.064436737	0.085994121	0.01555309	6.57E-05	0.00414358	0.860536583	0.003110192	0.030596688
2. CVD Fall	1	Men	2008	60	0.961999113	0.008703776	2.73E-05	0.003094033	0.012548216	0.000943943	0.012683667	0.922526958	0.022105676	0.028607492	0.010114129	0.016645743	0.889022037	0.050236284	0.02417562	0.036566059	0.009438941	0.928825599	0.020451771	0.005043871	0.036239819	0.076605461	0.84412935	0.02269877	0.056566419	0.052715031	0.81915983	0.039522847	0.088602292	0.08668201	0.805932403	0.009449487	0.0979361	0.095544039	0.016393755	0.000345149	0.020274418	0.816061284	0.004762999	0.046618355
2. CVD Fall	1	Men	2008	61	0.952675294	0.009438401	9.27E-05	0.009628815	0.014878289	0.000905205	0.01238134	0.940939102	0.003183152	0.029944048	0.009688046	0.016245652	0.903786122	0.037446494	0.023116893	0.035650491	0.012391029	0.92676454	0.020676996	0.004834422	0.035333014	0.064020549	0.859177552	0.021708683	0.055093215	0.060817321	0.815309752	0.037720427	0.086152501	0.094669331	0.801095999	0.009052149	0.095182521	0.085277626	0.01648224	0	0	0.848247232	0.004565372	0.045427529
2. CVD Fall	1	Men	2008	62	0.953327919	0.009161325	7.83E-05	0.008397971	0.016079201	0.000868118	0.012087149	0.933772193	0.009766885	0.031324973	0.009279797	0.015856151	0.880267246	0.062873809	0.02210161	0.034757335	0.013271799	0.923511886	0.02413406	0.00463382	0.034448434	0.07430441	0.85128268	0.020759293	0.053653616	0.044478914	0.835776566	0.035991024	0.083753496	0.094383706	0.80446014	0.008671461	0.092484693	0.088790747	0.020798611	0.000375287	0.017348771	0.824045676	0.004376098	0.044264809
2. CVD Fall	1	Men	2008	63	0.948442892	0.010797762	0.000118305	0.010719356	0.017288108	0.000832615	0.011800962	0.927224622	0.014936401	0.033473247	0.008888667	0.015477063	0.902212446	0.042773388	0.021128023	0.033886143	0.013666684	0.922175416	0.026130553	0.004441713	0.033585635	0.068520482	0.859383684	0.019848963	0.052246872	0.042567388	0.841696776	0.034331758	0.081404078	0.077265333	0.824586604	0.008306755	0.089841308	0.088004627	0.020698637	0.00039859	0.018494428	0.825079279	0.004194844	0.043129595
2. CVD Fall	1	Men	2008	64	0.950564982	0.010869279	0.000108053	0.009735248	0.016401147	0.000798633	0.011522658	0.915891838	0.021613534	0.038872438	0.008513971	0.015108219	0.893294599	0.05347445	0.020194466	0.033036485	0.01449305	0.926751974	0.02175302	0.004257763	0.032744192	0.068741393	0.861410209	0.018976128	0.05087227	0.085564864	0.802592134	0.032739883	0.07910312	0.093854389	0.810937077	0.007957393	0.087251141	0.100037721	0.021718264	0.000384255	0.017000853	0.814816299	0.00402129	0.042021317
2. CVD Fall	1	Men	2008	65	0.941969387	0.011288359	0.000116759	0.01012064	0.017071523	0.001272798	0.018160533	0.912288502	0.01509727	0.035260556	0.013548551	0.023805121	0.848884161	0.067069986	0.032063331	0.051982522	0.014140631	0.904528016	0.023026482	0.006781121	0.05152375	0.070129421	0.819796224	0.030136057	0.079938298	0.067465214	0.75664632	0.051855939	0.124032528	0.08367636	0.76693549	0.012664221	0.136723929	0.093642148	0.021613116	0.000644151	0.028296982	0.783323985	0.006404797	0.066074822
2. CVD Fall	1	Men	2008	66	0.93803311	0.011549724	0.000134764	0.011398834	0.019926195	0.001221107	0.017736266	0.911324806	0.016987902	0.035467706	0.012977438	0.023242148	0.852502341	0.066181319	0.030637549	0.050678792	0.015930307	0.895304528	0.032031409	0.006501032	0.050232725	0.078080879	0.815295623	0.028803221	0.077820276	0.065420662	0.764686682	0.049422353	0.120470303	0.079282127	0.775876156	0.012131789	0.132709929	0.099190003	0.021893462	0	0	0.808405509	0.006140554	0.064370471
2. CVD Fall	1	Men	2008	67	0.93532393	0.013135201	0.000168381	0.012488439	0.020388177	0.001171661	0.017324212	0.915379674	0.012921845	0.036572959	0.012430515	0.022695006	0.869664482	0.051656851	0.029270701	0.049407966	0.016394709	0.896061524	0.032336471	0.00623296	0.048974337	0.065107949	0.831615433	0.02752558	0.075751038	0.053048239	0.782881881	0.047088325	0.116981555	0.086469979	0.773131305	0.011621944	0.128776772	0.093854444	0.021960197	0.00053179	0.023111721	0.791947075	0.005887657	0.062707115
2. CVD Fall	1	Men	2008	68	0.933095035	0.013126472	0.000179001	0.013274166	0.022276721	0.001124373	0.016924232	0.900278693	0.024997084	0.040653887	0.011906838	0.022163498	0.8599708	0.063899199	0.027960496	0.048169504	0.018352602	0.894462117	0.033460792	0.005976438	0.04774805	0.067539518	0.832429822	0.026300983	0.073729677	0.064309814	0.777275102	0.044850121	0.113564963	0.081463732	0.78247938	0.011133804	0.124923084	0.093825743	0.022325265	0.000454681	0.019505015	0.797159604	0.005645667	0.061084025
2. CVD Fall	1	Men	2008	69	0.933969479	0.012358863	0.000185338	0.014589427	0.021281529	0.001079162	0.016536203	0.903705919	0.019072125	0.044169003	0.011405506	0.021647447	0.857204927	0.069127419	0.026704752	0.046962901	0.018299191	0.89146879	0.037947626	0.005731025	0.046553368	0.079321016	0.823796251	0.025127381	0.071755352	0.061737763	0.785338706	0.042704195	0.110219337	0.054378197	0.813807622	0.01066653	0.121147652	0.105819145	0.025504978	0	0	0.803761191	0.005414164	0.059500522
2. CVD Fall	1	Men	2008	70	0.918180929	0.013519516	0.000225741	0.016197459	0.024070652	0.001785664	0.026020039	0.883246302	0.020603561	0.043268258	0.018832544	0.034049335	0.806124116	0.076194154	0.043956708	0.073725021	0.021076112	0.85682353	0.039541998	0.009473957	0.073084403	0.069114063	0.777079956	0.04137363	0.112432351	0.038183389	0.719557931	0.070063477	0.172195203	0.084444811	0.708829055	0.017615025	0.189111109	0.096731028	0.024493801	0.000511648	0.019949797	0.756045215	0.008950736	0.093317776
2. CVD Fall	1	Men	2008	71	0.913076148	0.014137333	0.000282443	0.019304778	0.026051556	0.001714497	0.025433244	0.883592644	0.025918969	0.039179859	0.018041064	0.033267463	0.824836227	0.06131178	0.041969362	0.071882631	0.014570142	0.867389763	0.037692604	0.009087082	0.071260409	0.068416113	0.782666095	0.039516572	0.10940122	0.047543495	0.71875902	0.06666555	0.167031935	0.071093934	0.728749303	0.016877442	0.183279321	0.091838396	0.026443356	0	0	0.782239789	0.008585823	0.090892636
2. CVD Fall	1	Men	2008	72	0.91382139	0.01507719	0.000290739	0.018627816	0.025671086	0.001646527	0.024865252	0.881179571	0.025753771	0.043272967	0.017283872	0.032509819	0.830455273	0.059389577	0.04006566	0.07008949	0.020616538	0.859467917	0.041712996	0.008717272	0.069485277	0.0651247	0.790695088	0.037737811	0.106442401	0.062422423	0.712188882	0.063410149	0.161978545	0.067503389	0.738755431	0.016171879	0.1775693	0.108793129	0.028931023	0	0	0.765510362	0.008237026	0.088528459
2. CVD Fall	1	Men	2008	73	0.904303093	0.015586209	0.000409429	0.025186887	0.028616774	0.001581639	0.024315969	0.872937475	0.036442689	0.042283894	0.016559691	0.03177625	0.812839169	0.080573259	0.038242524	0.068345048	0.019597522	0.860139038	0.044141074	0.008363902	0.067758464	0.071378192	0.789032382	0.036034453	0.103554973	0.055079124	0.727594518	0.060292323	0.157034035	0.076059375	0.736463289	0.015497147	0.171980189	0.098896602	0.030788177	0.000892276	0.027272595	0.748022105	0.007903754	0.086224491
2. CVD Fall	1	Men	2008	74	0.908199158	0.016610329	0.000325961	0.018920325	0.030639171	0.001519723	0.023785333	0.871853143	0.036023831	0.045189076	0.01586731	0.03106664	0.836735998	0.060118156	0.036497029	0.066648817	0.026135127	0.861108485	0.038650523	0.008026377	0.066079488	0.074732975	0.790125146	0.03440375	0.100738129	0.059094016	0.731400968	0.057307377	0.152197639	0.074783921	0.743852558	0.014852114	0.166511407	0.100149442	0.028041153	0.002614023	0.082657797	0.694972078	0.007585446	0.083980062
2. CVD Fall	1	Men	2008	75	0.878766083	0.01678571	0.000494133	0.028101769	0.034130325	0.00263326	0.03908872	0.856602464	0.021943655	0.043015494	0.027412094	0.051026293	0.745037986	0.083006703	0.062783836	0.109171476	0.026235202	0.798524647	0.053107782	0.013888749	0.108243619	0.065210759	0.710999627	0.059208401	0.164581213	0.03781524	0.616341139	0.098162146	0.247681475	0.072001092	0.631654308	0.025663646	0.270680955	0.107110136	0.031988457	0.000610495	0.018116959	0.69166877	0.013126966	0.137378217
2. CVD Fall	1	Men	2008	76	0.883445848	0.019898898	0.000463827	0.022314404	0.033085201	0.002531813	0.038260008	0.831737568	0.043190693	0.048884715	0.026272427	0.049914597	0.765170924	0.06844427	0.059902289	0.106482516	0.026278941	0.803784179	0.05102006	0.013334408	0.105582411	0.062292596	0.721106721	0.056516709	0.160083973	0.05168485	0.615159322	0.093236441	0.239919387	0.080502945	0.632995892	0.024602178	0.261898985	0.102909089	0.037528544	0.000122753	0.003137516	0.709892038	0.01260426	0.133805799
2. CVD Fall	1	Men	2008	77	0.870937092	0.019817137	0.000637795	0.030542724	0.038167452	0.002435201	0.0374626	0.827384362	0.049721178	0.048867367	0.025184173	0.04884292	0.762394247	0.076586552	0.057146447	0.103872754	0.020006861	0.808876445	0.055311152	0.012805742	0.102999799	0.076006516	0.714348538	0.053942591	0.155702356	0.059908027	0.619227157	0.088527443	0.232337373	0.074995386	0.648096935	0.023588738	0.25331894	0.1004845	0.036866882	0	0	0.720211919	0.012105808	0.130330891
2. CVD Fall	1	Men	2008	78	0.877400326	0.01965933	0.000570156	0.027614232	0.035716094	0.002343267	0.036696596	0.84961766	0.027886181	0.050539281	0.024145564	0.047811313	0.766301763	0.077844382	0.054512035	0.101341819	0.02908434	0.793446666	0.064671681	0.012301894	0.100495419	0.066846439	0.730235771	0.051482026	0.151435764	0.062731836	0.628304188	0.084028296	0.22493568	0.073479692	0.658957001	0.022621677	0.24494163	0.113912735	0.042635674	0	0	0.704867839	0.011630799	0.126952952
2. CVD Fall	1	Men	2008	79	0.865591893	0.021714384	0.000767624	0.033376288	0.040331793	0.002255866	0.035962153	0.830270317	0.049300354	0.050454508	0.023154925	0.046819896	0.757556652	0.091558896	0.051994998	0.098889454	0.029985692	0.805881205	0.054242033	0.011822051	0.098069019	0.075666332	0.72791868	0.049131205	0.147283783	0.063066834	0.639485775	0.079732485	0.217714905	0.048242027	0.693290282	0.021699435	0.236768255	0.107333126	0.038004259	0.003487127	0.080557478	0.635767954	0.011178469	0.123671587
2. CVD Fall	1	Men	2008	80	0.831742085	0.025678137	0.001111711	0.040385755	0.036847104	0.003915355	0.060319854	0.784012571	0.050827137	0.046668398	0.040022154	0.078469741	0.656200143	0.089326225	0.089360571	0.165113061	0.031311623	0.733395926	0.051059733	0.020479788	0.163752929	0.075341314	0.595115162	0.084486378	0.245057147	0.046391503	0.45690932	0.136287084	0.360412094	0.063631099	0.507433415	0.037517222	0.391418264	0.112015386	0.050698934	0	0	0.611797031	0.019367359	0.206121291
2. CVD Fall	1	Men	2008	81	0.826910152	0.02783536	0.001207329	0.040363508	0.040737584	0.003773485	0.059172583	0.769546387	0.057347085	0.057792721	0.038401562	0.076912244	0.660029829	0.093556649	0.085227613	0.161185909	0.040903818	0.709449994	0.070080366	0.019697616	0.159868207	0.080172	0.600855969	0.080626651	0.23834538	0.047395271	0.474675185	0.129246068	0.348683476	0.060936075	0.524912763	0.036009098	0.378142064	0.10516946	0.040557427	0.001274414	0.029190759	0.604340692	0.018630214	0.200837033
2. CVD Fall	1	Men	2008	82	0.814173569	0.024861051	0.001270157	0.047336745	0.050638689	0.003639099	0.058080689	0.790559848	0.041774857	0.055381195	0.036859317	0.075424783	0.672552591	0.088768092	0.081286412	0.157392905	0.033549908	0.715943287	0.075435337	0.018954822	0.156116646	0.070521739	0.620702835	0.076946122	0.231829304	0.043138985	0.497051078	0.12253937	0.337270568	0.055814293	0.544387183	0.034574202	0.365224323	0.114635557	0.052779567	0.002503842	0.042787185	0.573646247	0.017930286	0.195717315
2. CVD Fall	1	Men	2008	83	0.827104568	0.02850149	0.001109312	0.03635378	0.046374009	0.003512004	0.057044835	0.758525674	0.069692662	0.062380638	0.035393018	0.074008008	0.656118255	0.112616421	0.077531035	0.153734289	0.039396986	0.711189749	0.078664499	0.018250275	0.152498492	0.074068978	0.626982482	0.073439221	0.225509319	0.052507318	0.505159218	0.116157179	0.326176285	0.066769666	0.547350933	0.033210302	0.352669098	0.120488283	0.04174751	0.008101994	0.154427091	0.467206287	0.017266507	0.190762328
2. CVD Fall	1	Men	2008	84	0.824653493	0.032684937	0.000914181	0.026294301	0.055995284	0.003392021	0.056065784	0.765858863	0.07010354	0.057374504	0.034000406	0.072662686	0.668361452	0.107472267	0.073955833	0.150210447	0.038204376	0.697521973	0.097676596	0.017582918	0.149014136	0.077798364	0.63271494	0.07010065	0.219386046	0.046874257	0.527631865	0.11009004	0.315403838	0.061594706	0.566009281	0.0319153	0.340480714	0.108900862	0.04548162	0.006250375	0.114571857	0.522184958	0.016637887	0.185972441
2. CVD Fall	1	Men	2008	85	0.818723052	0.034616442	0.000899538	0.02442815	0.052770351	0.003991777	0.064570691	0.753333119	0.080283739	0.043006985	0.039783236	0.083592921	0.638357217	0.103830535	0.085892864	0.171919384	0.036816968	0.683516823	0.088465765	0.020636769	0.170563674	0.080453091	0.588124373	0.081473698	0.249948838	0.045118937	0.470787689	0.127007953	0.35708542	0.077787153	0.500009945	0.037358052	0.38484485	0.121497121	0.047215036	0.010919545	0.176912637	0.411577064	0.019531063	0.212347534
2. CVD Fall	1	Men	2008	86	0.737227329	0.039310803	0.004350775	0.095296907	0.056391268	0.003862453	0.063560466	0.707385256	0.111729993	0.060436917	0.038259679	0.082188155	0.62950259	0.120426873	0.081959782	0.168110754	0.054264033	0.660293086	0.098732486	0.019911389	0.166799006	0.096424255	0.582532102	0.077801077	0.243242566	0.036861115	0.497545591	0.120355902	0.345237392	0.068234144	0.524375789	0.035942218	0.37144785	0.109044052	0.06915079	0.006044279	0.074337048	0.515448199	0.018848109	0.207127523
2. CVD Fall	1	Men	2008	87	0.749182979	0.029892745	0.003058862	0.089770053	0.061733963	0.003741251	0.062620147	0.73042099	0.093636361	0.058253663	0.036818497	0.080870489	0.643379407	0.113931267	0.078227207	0.164462119	0.028932393	0.683653241	0.104993213	0.019227952	0.163193201	0.078921183	0.609993091	0.074315756	0.23676997	0.034910442	0.517256223	0.114054848	0.333778487	0.052473616	0.554426856	0.034603468	0.35849606	0.113377276	0.027570101	0.030548505	0.49507499	0.113121184	0.018204835	0.202103109
2. CVD Fall	1	Men	2008	88	0.76476646	0.034503051	0.003082311	0.078925977	0.053343067	0.003628033	0.0617511	0.748183534	0.066229365	0.070488274	0.035457526	0.079641301	0.625517509	0.138818735	0.074689357	0.160974399	0.040824599	0.651580227	0.129262476	0.018585515	0.159747183	0.060789139	0.637666129	0.071012343	0.230532389	0.050202104	0.518990764	0.108094415	0.322712717	0.068734394	0.551931448	0.033339804	0.345994353	0.107641186	0.052288018	0.017674373	0.234952399	0.372568407	0.017600358	0.197275258
2. CVD Fall	1	Men	2008	89	0.790769751	0.025387246	0.001499835	0.054282895	0.063582793	0.003522679	0.0609548	0.69256021	0.121621823	0.073141169	0.034174728	0.07850207	0.641085891	0.129924905	0.071340647	0.157648557	0.034079424	0.683888022	0.107587423	0.017983212	0.156461919	0.068096165	0.639487017	0.067885639	0.224531179	0.051892325	0.533599474	0.102464368	0.312043832	0.066340555	0.567562933	0.03214935	0.333947162	0.122278356	0.040677372	0.008832591	0.169567685	0.448965155	0.017033873	0.192644968
2. CVD Fall	1	Men	2008	90	0.680281621	0.035510033	0.003633375	0.089188771	0.076778299	0.005977085	0.108630814	0.630623146	0.094284535	0.077869773	0.057532424	0.139690123	0.45770043	0.144709886	0.118972633	0.278617051	0.056518264	0.530452486	0.106081249	0.030399901	0.2765481	0.065891004	0.4262485	0.113309737	0.394550759	0.051031631	0.23516884	0.169543431	0.544256098	0.070304494	0.294166699	0.054150718	0.581378089	0.129625176	0.042133896	0.028993724	0.378635888	0.05236384	0.028802085	0.339445391
2. CVD Fall	1	Men	2008	91	0.690671071	0.038180326	0.003355808	0.077436698	0.0770701	0.005820186	0.107465811	0.605431195	0.139928655	0.061114747	0.055556773	0.137968631	0.501960508	0.111070685	0.113760842	0.273207966	0.047220091	0.502484233	0.149602612	0.029484888	0.271208177	0.077597882	0.429371136	0.108444006	0.384586976	0.048763332	0.263954684	0.16081863	0.526463354	0.055330808	0.331039871	0.052319705	0.561309616	0.147540297	0.070786864	0.010057587	0.114349062	0.297511379	0.027942391	0.33181242
2. CVD Fall	1	Men	2008	92	0.642841113	0.039582203	0.006033133	0.126227936	0.073197944	0.005676585	0.106441086	0.584168343	0.151496767	0.074208609	0.053707997	0.136418284	0.50072113	0.122331584	0.108851416	0.26809587	0.0588533	0.507603457	0.138743851	0.028636141	0.266163251	0.06404084	0.457042325	0.10386098	0.375055855	0.049639816	0.288341245	0.152617528	0.509401411	0.05303216	0.354282884	0.050607708	0.542077249	0.128674167	0.07427702	0	0	0.445362671	0.027145507	0.324540635
2. CVD Fall	1	Men	2008	93	0.671605334	0.048620067	0.0055413	0.096769641	0.066357468	0.005546211	0.10555998	0.609404648	0.130383043	0.073186824	0.051983229	0.135042255	0.461208977	0.17127343	0.104235463	0.263282129	0.056420108	0.528126025	0.126186524	0.027852634	0.261414709	0.070555599	0.463933171	0.099552455	0.365958775	0.046021256	0.315983492	0.144922524	0.493072728	0.068128983	0.359175858	0.049012119	0.52368304	0.13317999	0.065423976	0.013347629	0.156099583	0.287907165	0.026410496	0.317631162
2. CVD Fall	1	Men	2008	94	0.629621528	0.057519543	0.007058773	0.102246849	0.093298328	0.005429025	0.104825955	0.538227498	0.19956043	0.077988582	0.050379726	0.133843765	0.529533478	0.111794525	0.099904182	0.258767815	0.074576838	0.495720719	0.145605355	0.027133448	0.256963641	0.060772317	0.486420825	0.095510329	0.357296529	0.037444932	0.347360985	0.137715949	0.477478134	0.05735881	0.388983774	0.047530454	0.506126963	0.121125498	0.059390046	0.008702571	0.119102346	0.354858315	0.025736523	0.3110847
2. CVD Fall	1	Men	2008	95	0.651513908	0.049089654	0.005629393	0.097248733	0.086950719	0.005325025	0.104242568	0.638323411	0.10810489	0.071850821	0.048894847	0.132826031	0.498561673	0.151035895	0.095848819	0.254553613	0.085252217	0.464134794	0.171324467	0.02647776	0.252810762	0.060490585	0.498713658	0.091726556	0.349069201	0.04680292	0.359600398	0.130980031	0.462616651	0.039927558	0.424505381	0.046160332	0.489406729	0.126361721	0.067573763	0.02709729	0.259128429	0.189814528	0.02512285	0.30490142
2. CVD Fall	1	Men	2008	96	0.588921906	0.052303581	0.009039934	0.138325831	0.102361065	0.005234243	0.10381344	0.520312708	0.219094846	0.081074185	0.047526034	0.131992227	0.468552187	0.188747449	0.092060626	0.250639738	0.086510501	0.468331442	0.170316904	0.025884834	0.248956319	0.060924956	0.509605891	0.088193112	0.341276041	0.026823143	0.399994638	0.12469688	0.448485339	0.057822122	0.42376077	0.044899454	0.473517655	0.112761788	0.059670074	0.053063487	0.417634738	0.033220228	0.024568823	0.299080862
2. CVD Fall	1	Men	2008	97	0.58586071	0.050914048	0.008671883	0.136863869	0.108990521	0.00515675	0.103542219	0.473799164	0.26198794	0.086596684	0.046270785	0.131345428	0.504884702	0.159558626	0.08853083	0.247025842	0.099420474	0.49128322	0.138542289	0.025354017	0.2454	0.070863052	0.510319637	0.084901954	0.333915357	0.026676097	0.419396241	0.11884848	0.435079182	0.04975828	0.448043576	0.043745586	0.458452557	0.126341756	0.119129856	0.010132961	0.068257414	0.358442312	0.024073872	0.29362183
2. CVD Fall	1	Men	2008	98	0.50171113	0.044627113	0.012555645	0.207014828	0.125566098	0.00509265	0.103432537	0.43421288	0.317782224	0.071989712	0.045126637	0.130888547	0.560687061	0.11035141	0.085250603	0.243710926	0.078447062	0.508429822	0.146097543	0.024884722	0.24214085	0.066366302	0.524804285	0.081844997	0.326984415	0.049244372	0.414947918	0.113416703	0.422391006	0.041859251	0.471242503	0.042696532	0.444201714	0.134427551	0.064742826	0.038809025	0.335969646	0.113891152	0.023637495	0.288522304
2. CVD Fall	1	Men	2008	99	0.589572581	0.052240043	0.007549216	0.11871453	0.123393579	0.005042086	0.103487965	0.452874429	0.27437389	0.098036264	0.044091137	0.13062428	0.500188161	0.176907543	0.082211035	0.240693261	0.089320037	0.518427513	0.128598837	0.024476424	0.239177189	0.074338979	0.526167585	0.079014082	0.320479354	0.050409877	0.430795354	0.108383325	0.410411443	0.072049848	0.455447185	0.041750116	0.43075285	0.116943665	0.109283735	0.004692415	0.03647773	0.425563846	0.023259252	0.283779357
2. CVD Fall	1	Men	2008	100	0.38306934	0.055430953	0.026345246	0.295817514	0.130619746	0.005005238	0.103711962	0.462033697	0.262803941	0.101445508	0.043161825	0.130555029	0.509079554	0.173547013	0.079403124	0.237970309	0.121438431	0.441184822	0.176741571	0.024128642	0.236506534	0.06081095	0.548392971	0.076400962	0.314395116	0.038230262	0.458910752	0.103730059	0.399128927	0.059306589	0.481698062	0.04090416	0.418091189	0.117939883	0.104361417	0.01409419	0.104888694	0.356387986	0.022938752	0.279389078
2. CVD Fall	1	Men	2009	35	0.991277222	0.00234702	0	0	0.003113834	0.000179873	0.003082051	0.981130383	0	0.012863246	0.001952412	0.004053958	0.966226516	0.020003687	0.004761954	0.009007843	0	0.990107511	0	0.000966695	0.008925794	0.040154371	0.941286514	0.004461501	0.014097614	0	0.969535132	0.00796211	0.022502759	0	0.973165329	0.00182239	0.025012281	0.067008055	0.004265859	0	0	0.916262372	0.000912502	0.011551212
2. CVD Fall	1	Men	2009	36	0.991932317	0.001961629	0	0	0.002926807	0.000172402	0.003006845	0.97053013	0	0.02364401	0.001870952	0.003954908	0.964216845	0.022435001	0.004561855	0.0087863	0	0.990367244	0	0.000926463	0.008706293	0.060724474	0.921252803	0.004274169	0.013748554	0	0.970435733	0.00762484	0.021939427	0	0.973869538	0.00174638	0.024384083	0.080636751	0.0048211	0	0	0.902401459	0.000874531	0.011266159
2. CVD Fall	1	Men	2009	37	0.990583883	0.00313381	0	0	0.003183582	0.000165242	0.002933483	0.974325179	0	0.020023671	0.00179287	0.00385828	0.982562121	0.004497761	0.004370016	0.008570102	0	0.99062001	0	0.000887902	0.008492088	0.094389678	0.888107949	0.004094574	0.013407799	0	0.971309371	0.007301425	0.021389204	0	0.974556069	0.001673523	0.023770409	0.072223124	0.003753811	0	0	0.912196993	0.000838137	0.010987936
2. CVD Fall	1	Men	2009	38	0.990662234	0.003178739	0	0	0.003138726	0.00015838	0.002861921	0.968177745	0	0.026340212	0.001718027	0.003764016	0.952140904	0.035313887	0.004186093	0.008359116	0	0.990866007	0	0.000850944	0.00828305	0.09135525	0.891647216	0.003922394	0.013075141	0	0.972156968	0.006991286	0.020851746	0	0.97522544	0.001603688	0.023170872	0.07896948	0.006357265	0	0	0.903153628	0.000803255	0.010716371
2. CVD Fall	1	Men	2009	39	0.989795395	0.003088402	0	0	0.004172284	0.000151803	0.002792116	0.981410238	0	0.013271415	0.001646288	0.003672059	0.965199454	0.022637573	0.004009758	0.008153215	0	0.991105429	0	0.000815521	0.00807905	0.079816579	0.903675728	0.003757321	0.012750372	0	0.972979416	0.006693868	0.020326716	0	0.975878154	0.001536751	0.022585095	0.06159259	0.006988534	0	0	0.920197753	0.000769824	0.0104513
2. CVD Fall	1	Men	2009	40	0.990558264	0.002692848	0	0	0.002755016	0.000263932	0.003729939	0.976382591	0	0.015850613	0.002861571	0.004905226	0.964672312	0.017471967	0.006966879	0.010888841	0	0.987792429	0	0.00141774	0.010789832	0.077374033	0.899072818	0.006528561	0.017024588	0	0.961244458	0.011625042	0.0271305	0	0.967187343	0.002671225	0.030141432	0.076017466	0.00809615	0	0	0.900591671	0.001338308	0.013956405
2. CVD Fall	1	Men	2009	41	0.987571454	0.00315809	0	0	0.00537848	0.000252975	0.003639	0.979280666	0	0.013191919	0.002742008	0.004785407	0.967441283	0.015265552	0.006672844	0.010620321	0	0.988117491	0	0.001358714	0.010523795	0.095910557	0.881235439	0.006253318	0.016600686	0	0.962426877	0.011128843	0.02644428	0	0.968064812	0.002559667	0.029375521	0.080338773	0.004951439	0	0	0.899816619	0.0012826	0.013610569
2. CVD Fall	1	Men	2009	42	0.988267272	0.003619053	0	0	0.004320899	0.000242474	0.003550302	0.974449522	0	0.018254546	0.002627403	0.004668529	0.944120808	0.039130007	0.006390922	0.010358263	0	0.988433697	0	0.001302142	0.010264162	0.065269534	0.912554255	0.005989424	0.016186787	0	0.963573294	0.01065295	0.025773756	0	0.968920294	0.002452737	0.028626969	0.070878336	0.007198671	0	0	0.907420812	0.001229209	0.013272973
2. CVD Fall	1	Men	2009	43	0.98748482	0.003297845	0	0	0.005521134	0.000232411	0.00346379	0.97494614	0	0.017981789	0.00251755	0.004554522	0.956967274	0.026809608	0.006120611	0.010102507	0	0.988741303	0	0.001247922	0.010010776	0.09816903	0.880311929	0.005736404	0.015782636	0	0.964684976	0.010196518	0.025118506	0	0.969754452	0.002350242	0.027895306	0.089442116	0.006161187	0	0	0.890275248	0.001178037	0.012943412
2. CVD Fall	1	Men	2009	44	0.98713174	0.003623618	0	0	0.005642459	0.000222767	0.003379416	0.958533709	0	0.034610721	0.002412252	0.004443317	0.974658707	0.009626967	0.005861426	0.009852901	0	0.989040561	0	0.001195956	0.009763484	0.077160349	0.901957857	0.005493808	0.015387986	0	0.965763146	0.009758734	0.02447812	0	0.970567932	0.002251999	0.027180069	0.078773884	0.007650658	0	0	0.89982478	0.001128993	0.012621685
2. CVD Fall	1	Men	2009	45	0.984790822	0.004176389	0	0	0.00597864	0.00038889	0.004665259	0.966580916	0	0.023075936	0.004209568	0.00613358	0.970152992	0.006027691	0.010222687	0.013596629	0	0.984439226	0	0.002087466	0.013473308	0.060398332	0.908791674	0.009582133	0.02122786	0	0.949241799	0.017008635	0.033749567	0	0.958601066	0.003930021	0.037468913	0.066748909	0.009040673	0	0	0.904825227	0.001970609	0.017414583
2. CVD Fall	1	Men	2009	46	0.98349199	0.004513901	0	0	0.007069635	0.00037276	0.004551714	0.969500304	0	0.020482438	0.004033367	0.00598389	0.942545753	0.034405353	0.009788676	0.013260218	0	0.984859445	0	0.002000531	0.013140024	0.064604032	0.905524721	0.009175927	0.02069532	0	0.950841121	0.016275049	0.03288383	0	0.959732884	0.00376563	0.036501486	0.064530304	0.007983977	0	0	0.908616451	0.001888564	0.016980704
2. CVD Fall	1	Men	2009	47	0.984840476	0.004257995	0	0	0.006103237	0.000357304	0.004440988	0.972974987	0	0.017322642	0.003864473	0.005837897	0.962508369	0.015187239	0.009372505	0.012931888	0	0.985268037	0	0.001917214	0.012814748	0.073689086	0.897349257	0.008786434	0.020175223	0	0.952391177	0.015571358	0.032037465	0	0.960836501	0.00360806	0.035555439	0.077798879	0.01039037	0	0	0.893443714	0.001809934	0.016557103
2. CVD Fall	1	Men	2009	48	0.984255185	0.00441774	0	0	0.006651564	0.000342492	0.004333018	0.964602431	0	0.025999468	0.003702585	0.005695517	0.950622404	0.027792721	0.008973433	0.012611442	0	0.985665347	0	0.001837366	0.012497288	0.077686944	0.894232845	0.008412959	0.019667252	0	0.953893738	0.014896319	0.031209944	0	0.961912789	0.003457028	0.034630182	0.081800353	0.010410808	0	0	0.889910739	0.001734577	0.016143523
2. CVD Fall	1	Men	2009	49	0.983041166	0.00528517	0	0	0.007117621	0.0003283	0.004227743	0.966095363	0	0.024800559	0.003547411	0.005556667	0.946219168	0.03289139	0.008590752	0.01229869	0	0.986051705	0	0.001760842	0.012187453	0.064940978	0.907833086	0.008054838	0.019171099	0	0.955350506	0.01424874	0.030400754	0	0.962962595	0.003312265	0.03372514	0.08448648	0.009097399	0	0	0.889014044	0.001662359	0.015739717
2. CVD Fall	1	Men	2009	50	0.970121744	0.005654346	5.42E-05	0.009440884	0.00783585	0.000538402	0.00635457	0.942946544	0.02372474	0.019162859	0.005814592	0.008351265	0.933570793	0.033884163	0.014069575	0.018475468	0.007004775	0.957653308	0.014146358	0.002887054	0.018308505	0.067011028	0.891010126	0.013193033	0.028785813	0.074899961	0.8561734	0.023314448	0.045612191	0.076981159	0.867001037	0.00542937	0.050588434	0.076301482	0.01007657	0.000221305	0.021269039	0.865766885	0.002725627	0.023639093
2. CVD Fall	1	Men	2009	51	0.973977206	0.006498408	3.10E-05	0.004722547	0.008054266	0.000516109	0.006200427	0.956626843	0.006049379	0.023605204	0.005570689	0.008147885	0.964186169	0.004329777	0.013467507	0.018016546	0.008428517	0.959624429	0.011326359	0.002766818	0.017853877	0.074482182	0.884831617	0.012629658	0.028056544	0.03464342	0.898641988	0.022294739	0.044419853	0.120260775	0.825283424	0.00520184	0.049253961	0.077642058	0.010247161	8.51E-06	0.000821258	0.885622803	0.002612159	0.02304605
2. CVD Fall	1	Men	2009	52	0.978648862	0.005777647	6.21E-06	0.001067358	0.007955008	0.00049475	0.006050167	0.94669901	0.014807672	0.02520682	0.005336909	0.007949589	0.937615034	0.031926181	0.012890136	0.017568649	0.007227076	0.962228727	0.010482422	0.002651597	0.017410178	0.06051893	0.900047519	0.012089418	0.027344132	0.076278936	0.859151147	0.021316409	0.043253508	0.095224008	0.851844123	0.00498376	0.047948109	0.084015622	0.012880544	9.54E-05	0.007254865	0.87078319	0.002503425	0.022466978
2. CVD Fall	1	Men	2009	53	0.973823311	0.007068829	2.40E-05	0.003364429	0.009341404	0.000474286	0.005903707	0.954953218	0.007380922	0.024796757	0.005112837	0.007756266	0.950843767	0.019688277	0.012336439	0.017131517	0.008440394	0.962330603	0.009710668	0.002541184	0.016977151	0.082090888	0.879689601	0.011571358	0.026648154	0.066870504	0.8706393	0.020377748	0.042112447	0.084208572	0.864346602	0.004774742	0.046670085	0.085350369	0.014177435	0.000202978	0.013911949	0.862056502	0.00239923	0.021901537
2. CVD Fall	1	Men	2009	54	0.974419307	0.007361481	1.87E-05	0.002516442	0.009468411	0.00045468	0.005760969	0.963038222	0.001810454	0.022685441	0.004898073	0.007567809	0.940301489	0.031188174	0.011805439	0.016704899	0.010557209	0.956344883	0.014107981	0.002435383	0.016554545	0.085810581	0.877146662	0.011074561	0.025968197	0.061302697	0.878224193	0.019477124	0.040995986	0.076193998	0.873812469	0.004574412	0.045419122	0.080562549	0.013056287	0	0	0.882732381	0.002299388	0.021349395
2. CVD Fall	1	Men	2009	55	0.963693314	0.007584912	6.87E-05	0.008902757	0.010038185	0.000700001	0.009012167	0.950992253	0.001536846	0.028098592	0.007535176	0.011837133	0.913523308	0.042224911	0.018140363	0.026111418	0.009833359	0.948115571	0.01242625	0.003748135	0.025876685	0.07607517	0.866342004	0.017019378	0.040563448	0.067861084	0.838281296	0.029890234	0.063967386	0.083617192	0.838499052	0.007037639	0.070846116	0.089982959	0.015223313	0	0	0.857894894	0.003538915	0.033359919
2. CVD Fall	1	Men	2009	56	0.963271863	0.007837494	6.05E-05	0.007597504	0.011766633	0.000671108	0.008794915	0.953913252	0.004226808	0.02309143	0.00721837	0.011550141	0.914692703	0.042491128	0.017356094	0.025460075	0.010699941	0.946215109	0.01426131	0.003592145	0.025231495	0.07343876	0.87075262	0.016285711	0.039522909	0.109257196	0.799930778	0.028558679	0.062253347	0.084602527	0.839731341	0.006742145	0.068923987	0.08866456	0.014034027	0.000565461	0.038166109	0.822662202	0.003391716	0.032515924
2. CVD Fall	1	Men	2009	57	0.959651385	0.007524973	8.92E-05	0.011620157	0.011887621	0.000643433	0.008583274	0.946904187	0.011997119	0.02291347	0.006914749	0.011270475	0.920547634	0.038023954	0.016603958	0.024824455	0.008965166	0.943778227	0.019212025	0.00344269	0.024601892	0.05769838	0.888213278	0.015582147	0.038506195	0.072387231	0.839756112	0.027281002	0.060575655	0.07822986	0.84826939	0.006458958	0.067041792	0.074915373	0.015631251	0.000453405	0.027735269	0.846322257	0.003250686	0.031691759
2. CVD Fall	1	Men	2009	58	0.9590947	0.007903284	8.74E-05	0.010851962	0.013068581	0.000616926	0.008377135	0.927687186	0.027343204	0.027347847	0.006623773	0.01099799	0.896896678	0.063016479	0.015882637	0.024204206	0.013095475	0.941314198	0.018303292	0.003299504	0.023987531	0.067510983	0.880068836	0.014907452	0.037512729	0.064807978	0.850203655	0.026055014	0.058933353	0.099134665	0.82947929	0.006187577	0.065198468	0.093217965	0.017357261	8.62E-06	0.000487982	0.854925634	0.003115573	0.030886962
2. CVD Fall	1	Men	2009	59	0.959246637	0.008445211	8.54E-05	0.00992063	0.013534233	0.000591539	0.008176394	0.934021825	0.019367772	0.029532929	0.006344927	0.010732547	0.925802831	0.035407303	0.015190874	0.023598992	0.012071673	0.945921096	0.015456823	0.003162332	0.023388076	0.065073151	0.884124449	0.014260448	0.036541953	0.045577379	0.872218476	0.024878621	0.057325523	0.075884585	0.854794898	0.00592752	0.063392997	0.085994121	0.014909665	6.13E-05	0.004034357	0.861913316	0.002986139	0.030101086
2. CVD Fall	1	Men	2009	60	0.962827836	0.008288059	2.52E-05	0.003011762	0.012548216	0.000890878	0.012408001	0.924054171	0.021508823	0.028607492	0.009545546	0.016283967	0.891175833	0.050236284	0.022816546	0.035771337	0.00898735	0.930348371	0.020451771	0.004760321	0.035452187	0.076605461	0.846634808	0.021422719	0.055337011	0.052715031	0.823307346	0.037301002	0.086676621	0.08668201	0.808592153	0.008918268	0.095807569	0.095544039	0.015618296	0.000319763	0.019743076	0.81867443	0.004495239	0.045605158
2. CVD Fall	1	Men	2009	61	0.953781077	0.00891508	8.51E-05	0.009373859	0.014878289	0.000854318	0.012112245	0.941922758	0.003097207	0.029944048	0.009143416	0.015892571	0.905860502	0.037446494	0.021817337	0.034875667	0.011700895	0.928494372	0.020676996	0.004562646	0.03456509	0.064020549	0.861595332	0.020488292	0.053895826	0.060817321	0.819302699	0.035599908	0.084280073	0.094669331	0.803673567	0.008543267	0.093113836	0.085277626	0.015564241	0	0	0.850409197	0.004308722	0.044440213
2. CVD Fall	1	Men	2009	62	0.95445422	0.008575386	7.13E-05	0.008176116	0.016079201	0.000819315	0.011824448	0.934902195	0.009503179	0.031324973	0.008758118	0.015511536	0.882265138	0.062873809	0.02085913	0.034001924	0.012420097	0.925372784	0.02413406	0.004373322	0.033699736	0.07430441	0.853615801	0.019592274	0.052487515	0.044478914	0.839620151	0.033967727	0.081933207	0.094383706	0.806957672	0.00818398	0.090474642	0.088790747	0.019473367	0.000341721	0.016903788	0.827057525	0.004130088	0.043302763
2. CVD Fall	1	Men	2009	63	0.949818417	0.010018142	0.000106768	0.010438276	0.017288108	0.000785808	0.011544482	0.928463973	0.014533118	0.033473247	0.008388975	0.015140686	0.904136672	0.042773388	0.019940275	0.033149665	0.012676171	0.924145573	0.026130553	0.004192015	0.032855689	0.068520482	0.861635055	0.018733119	0.051111345	0.042567388	0.845396022	0.032401739	0.079634852	0.077265333	0.827006182	0.007839777	0.087888708	0.088004627	0.019208456	0.00035972	0.018023187	0.828252766	0.003959023	0.042192222
2. CVD Fall	1	Men	2009	64	0.951992688	0.01000267	9.67E-05	0.009480804	0.016401147	0.000753737	0.011272226	0.917282391	0.021029969	0.038872438	0.008035343	0.014779859	0.895147876	0.05347445	0.0190592	0.032318474	0.013333939	0.928862102	0.02175302	0.004018406	0.032032534	0.068741393	0.863582636	0.017909352	0.049766618	0.085564864	0.80615188	0.030899354	0.077383903	0.093854389	0.813280721	0.007510055	0.085354836	0.100037721	0.019990846	0.000343978	0.016571732	0.818152465	0.003795226	0.041108031
2. CVD Fall	1	Men	2009	65	0.943787269	0.010319252	0.000103824	0.009857165	0.017071523	0.001190111	0.017670857	0.91421819	0.014689644	0.035260556	0.012668365	0.023163245	0.85236881	0.067069986	0.029980327	0.050580877	0.012923047	0.907575412	0.023026482	0.006340583	0.050134475	0.070129421	0.82390946	0.028178259	0.07778286	0.067465214	0.763359542	0.048487103	0.120688142	0.08367636	0.771444819	0.011841486	0.133037335	0.093642148	0.019768006	0.000572791	0.027586931	0.788148223	0.005988707	0.064293194
2. CVD Fall	1	Men	2009	66	0.939941868	0.010509939	0.000119283	0.011102908	0.019926195	0.001141778	0.017258029	0.913253258	0.016529229	0.035467706	0.012134355	0.022615452	0.85585921	0.066181319	0.028647172	0.0493123	0.014491587	0.898520053	0.032031409	0.006078691	0.04887826	0.078080879	0.819265161	0.026932012	0.075721947	0.065420662	0.771145754	0.046211616	0.117221968	0.079282127	0.780242662	0.011343644	0.129131567	0.099190003	0.01991619	0	0	0.812517375	0.005741632	0.0626348
2. CVD Fall	1	Men	2009	67	0.937414305	0.011929804	0.000148748	0.012166337	0.020388177	0.001095543	0.016857085	0.917148059	0.012572955	0.036572959	0.011622964	0.022083063	0.872898287	0.051656851	0.027369122	0.048075741	0.01488504	0.899296652	0.032336471	0.005828034	0.047653803	0.065107949	0.835446175	0.025737373	0.073708504	0.053048239	0.789095253	0.044029219	0.11382729	0.086469979	0.777358637	0.010866921	0.125304463	0.093854444	0.019951079	0.000469785	0.022535351	0.796667883	0.005505164	0.061016294
2. CVD Fall	1	Men	2009	68	0.935179995	0.011934134	0.000158289	0.012931643	0.022276721	0.001051328	0.016467891	0.902324757	0.024322163	0.040653887	0.011133307	0.021565886	0.863086094	0.063899199	0.026144035	0.046870672	0.016679409	0.897811039	0.033460792	0.005588177	0.046460582	0.067539518	0.836126504	0.024592332	0.071741646	0.064309814	0.783250944	0.04193642	0.110502822	0.081463732	0.786571089	0.010410493	0.121554685	0.093825743	0.020301045	0.000402071	0.019018713	0.801736565	0.005278894	0.059436969
2. CVD Fall	1	Men	2009	69	0.935970982	0.011272265	0.000164412	0.014211434	0.021281529	0.001009054	0.016090324	0.905545526	0.018557178	0.044169003	0.010664544	0.02106375	0.860206107	0.069127419	0.024969871	0.045696604	0.016683562	0.894711992	0.037947626	0.005358707	0.045298113	0.079321016	0.827363454	0.023494973	0.069820556	0.061737763	0.791084926	0.039929904	0.107247407	0.054378197	0.817767175	0.009973575	0.117881053	0.105819145	0.023253151	0	0	0.807969109	0.005062431	0.057896163
2. CVD Fall	1	Men	2009	70	0.920465737	0.012384598	0.000201117	0.015778657	0.024070652	0.001673584	0.025425655	0.885762456	0.020047265	0.043268258	0.017650486	0.033271536	0.810567261	0.076194154	0.041197686	0.072040898	0.019298143	0.860865638	0.039541998	0.008879307	0.071414914	0.069114063	0.782245172	0.03877674	0.109864025	0.038183389	0.727889097	0.065665817	0.168261696	0.084444811	0.714254616	0.016509387	0.184791186	0.096731028	0.022440166	0.000455836	0.019453149	0.761344803	0.008388927	0.09118609
2. CVD Fall	1	Men	2009	71	0.915420978	0.01300995	0.000252766	0.0188056	0.026051556	0.001606884	0.024852265	0.886184774	0.025219157	0.039179859	0.016908685	0.032507525	0.829112546	0.06131178	0.039335079	0.070240594	0.013401016	0.870757079	0.037692604	0.008516715	0.069632586	0.068416113	0.787645508	0.037036244	0.106902135	0.047543495	0.726758964	0.062481167	0.163216374	0.071093934	0.733995351	0.015818099	0.179092616	0.091838396	0.024321509	0	0	0.786976829	0.008046919	0.088816348
2. CVD Fall	1	Men	2009	72	0.916153367	0.013927365	0.000261179	0.018146575	0.025671086	0.00154318	0.024297247	0.883702407	0.02505842	0.043272967	0.016199019	0.031767188	0.834571141	0.059389577	0.037550867	0.068488415	0.019034358	0.863184525	0.041712996	0.008170117	0.067898004	0.0651247	0.795495265	0.03536913	0.104010905	0.062422423	0.719869059	0.059430097	0.15827842	0.067503389	0.743826757	0.015156822	0.173513031	0.108793129	0.026710763	0	0	0.770269916	0.007720014	0.086506177
2. CVD Fall	1	Men	2009	73	0.906799823	0.014435311	0.000368697	0.024536519	0.028616774	0.001482364	0.023760512	0.875686701	0.035458737	0.042283894	0.015520293	0.031050376	0.816800756	0.080573259	0.035842164	0.066783821	0.018137561	0.863671801	0.044141074	0.007838927	0.066210637	0.071378192	0.793659687	0.033772686	0.101189435	0.055079124	0.73496605	0.056507967	0.153446859	0.076059375	0.741364591	0.01452444	0.168051593	0.098896602	0.028516841	0.000803507	0.026600912	0.753519638	0.007407661	0.084254839
2. CVD Fall	1	Men	2009	74	0.910571909	0.015395951	0.000293817	0.01843282	0.030639171	0.001424335	0.023241997	0.874531392	0.035051187	0.045189076	0.01487137	0.030356975	0.840549278	0.060118156	0.034206228	0.065126338	0.024211564	0.865045312	0.038650523	0.007522587	0.064570014	0.074732975	0.794585751	0.032244337	0.098436937	0.059094016	0.738474665	0.053710376	0.148720943	0.074783921	0.748588448	0.013919895	0.162707737	0.100149442	0.026042689	0.002356245	0.080613236	0.701667376	0.007109332	0.08206168
2. CVD Fall	1	Men	2009	75	0.882055389	0.015555478	0.0004452	0.027378613	0.034130325	0.002449621	0.037985374	0.860546912	0.021351176	0.043015494	0.025500429	0.049585988	0.752497958	0.083006703	0.058405415	0.106089924	0.024293104	0.80449068	0.053107782	0.012920175	0.105188258	0.065210759	0.71977429	0.055079324	0.159935627	0.03781524	0.630178007	0.091316512	0.240690241	0.072001092	0.641084473	0.023873914	0.263040522	0.107110136	0.029635729	0.000550039	0.017671773	0.699320323	0.012211517	0.133500482
2. CVD Fall	1	Men	2009	76	0.886813204	0.018403072	0.000417116	0.021746103	0.033085201	0.00235525	0.037180054	0.836144829	0.042024544	0.048884715	0.02444024	0.048505672	0.772354043	0.06844427	0.055724822	0.103476865	0.024288234	0.809685046	0.05102006	0.012404492	0.102602167	0.062292596	0.729566729	0.052575346	0.155565328	0.05168485	0.628433582	0.086734316	0.233147251	0.080502945	0.642104147	0.022886471	0.254506437	0.102909089	0.034688709	0.000110391	0.003061851	0.717475794	0.011725264	0.130028901
2. CVD Fall	1	Men	2009	77	0.874551253	0.018272121	0.000571696	0.029766949	0.038167452	0.002265375	0.036405154	0.831861803	0.048378706	0.048867367	0.023427879	0.047464245	0.769311514	0.076586552	0.053161167	0.100940767	0.018431038	0.814252661	0.055311152	0.011912695	0.100092453	0.076006516	0.722505353	0.050180741	0.15130739	0.059908027	0.631959006	0.082353714	0.225779253	0.074995386	0.656892328	0.021943706	0.246168579	0.1004845	0.033963094	0	0	0.727638754	0.011261573	0.126652078
2. CVD Fall	1	Men	2009	78	0.880976701	0.018043172	0.000508757	0.026914652	0.035716094	0.002179852	0.035660772	0.853404007	0.027133254	0.050539281	0.0224617	0.046461757	0.772963871	0.077844382	0.050710474	0.098481273	0.026672483	0.799553088	0.064671681	0.011443984	0.097658764	0.066846439	0.738100559	0.047891771	0.14716123	0.062731836	0.64051335	0.078168329	0.218586485	0.073479692	0.667448489	0.021044086	0.238027733	0.113912735	0.039100056	0	0	0.712798031	0.01081969	0.123369488
2. CVD Fall	1	Men	2009	79	0.869570042	0.019830533	0.00068145	0.032540577	0.040331793	0.002098546	0.034947059	0.834537777	0.047969244	0.050454508	0.021540146	0.045498325	0.763974005	0.091558896	0.04836897	0.09609813	0.027358144	0.812101366	0.054242033	0.010997605	0.095300853	0.075666332	0.73550233	0.045704892	0.143126446	0.063066834	0.651191537	0.0741721	0.211569529	0.048242027	0.701486748	0.020186159	0.230085066	0.107333126	0.034759972	0.003095659	0.078679741	0.645551853	0.010398904	0.120180744
2. CVD Fall	1	Men	2009	80	0.83679285	0.023339119	0.000982015	0.039395019	0.036847104	0.003671482	0.058972411	0.789630612	0.049454804	0.046668398	0.037529326	0.07671686	0.665454417	0.089326225	0.083794642	0.161424715	0.028426223	0.741214896	0.051059733	0.01920418	0.160094967	0.075341314	0.605851656	0.079224043	0.239582986	0.046391503	0.473449116	0.127798281	0.3523611	0.063631099	0.518513839	0.035180417	0.382674645	0.112015386	0.046026972	0	0	0.622279711	0.01816104	0.201516892
2. CVD Fall	1	Men	2009	81	0.832226722	0.025198053	0.001062185	0.039386239	0.040737584	0.003538449	0.057850768	0.775204734	0.055798713	0.057792721	0.036009675	0.075194156	0.668938951	0.093556649	0.07991911	0.15758529	0.036985006	0.718166879	0.070080366	0.018470726	0.156297023	0.080172	0.611202126	0.075604725	0.233021149	0.047395271	0.490514426	0.121195823	0.340894479	0.060936075	0.535602683	0.033766229	0.369695013	0.10516946	0.036702914	0.001121206	0.028521408	0.614664528	0.017469809	0.196350675
2. CVD Fall	1	Men	2009	82	0.819413484	0.022457612	0.001114848	0.046179668	0.050638689	0.003412434	0.056783266	0.795668457	0.040646936	0.055381195	0.034563491	0.073739921	0.681131502	0.088768092	0.076223391	0.153877015	0.030264726	0.723896473	0.075435337	0.017774199	0.152629265	0.070521739	0.630674188	0.072153442	0.226650631	0.043138985	0.512217639	0.11490686	0.329736516	0.055814293	0.554699169	0.032420707	0.357065832	0.114635557	0.047672415	0.002197684	0.041870486	0.585465058	0.016813477	0.191345323
2. CVD Fall	1	Men	2009	83	0.832375422	0.025735174	0.000973576	0.035478013	0.046374009	0.003293255	0.055770551	0.764265085	0.06781096	0.062380638	0.033188522	0.072354795	0.66438153	0.112616421	0.072701922	0.150300126	0.035535824	0.719594207	0.078664499	0.017113535	0.149091935	0.074068978	0.636594226	0.068864972	0.220471824	0.052507318	0.51968043	0.108922191	0.318890061	0.066769666	0.557297504	0.031141759	0.34479107	0.120488283	0.037853297	0.007110632	0.151030168	0.480825557	0.016191042	0.186501021
2. CVD Fall	1	Men	2009	84	0.829974724	0.029562025	0.000803903	0.02566995	0.055995284	0.003180745	0.05481337	0.771492575	0.068210745	0.057374504	0.03188265	0.071039525	0.676323325	0.107472267	0.069349406	0.146855001	0.03452803	0.705622215	0.097676596	0.016487745	0.145685414	0.077798364	0.641981954	0.065734348	0.214485335	0.046874257	0.541534539	0.103232951	0.308358252	0.061594706	0.575602924	0.029927417	0.332874953	0.108900862	0.041257517	0.005496391	0.112063641	0.53486188	0.015601576	0.181818133
2. CVD Fall	1	Men	2009	85	0.82336125	0.03138493	0.000792987	0.023850853	0.052770351	0.003807978	0.06403165	0.758030414	0.078116078	0.043006985	0.037951442	0.082895081	0.643747296	0.103830535	0.08193798	0.170484189	0.03335663	0.689351246	0.088465765	0.019686562	0.169139797	0.080453091	0.59396237	0.077722292	0.247862247	0.045118937	0.479616666	0.121159951	0.354104446	0.077787153	0.504942785	0.035637924	0.381632138	0.121497121	0.043044526	0.009626126	0.173134587	0.423491031	0.018631767	0.210574842
2. CVD Fall	1	Men	2009	86	0.744916582	0.035020489	0.003760053	0.093197142	0.056391268	0.003684608	0.063029858	0.712849721	0.108713283	0.060436917	0.036498036	0.081502042	0.634679778	0.120426873	0.078185994	0.166707354	0.048197722	0.668668655	0.098732486	0.018994581	0.165406556	0.096424255	0.58814501	0.074218775	0.241211959	0.036861115	0.505969371	0.114814189	0.342355325	0.068234144	0.529131599	0.034287281	0.368346976	0.109044052	0.061565202	0.005223623	0.072987409	0.527801047	0.01798026	0.205398408
2. CVD Fall	1	Men	2009	87	0.754661479	0.027615646	0.002741977	0.087580556	0.061733963	0.003568988	0.06209739	0.735319569	0.091108179	0.058253663	0.035123212	0.080195376	0.648354271	0.113931267	0.074625284	0.163089178	0.026654806	0.688178515	0.104993213	0.018342613	0.161830853	0.078921183	0.615391487	0.070893933	0.234793398	0.034910442	0.525294215	0.108803263	0.33099208	0.052473616	0.559012902	0.033010172	0.355503309	0.113377276	0.026159635	0.027383816	0.484047844	0.131248886	0.017366604	0.200415938
2. CVD Fall	1	Men	2009	88	0.770960899	0.031205389	0.002705921	0.077088143	0.053343067	0.003460983	0.061235598	0.752269198	0.064441173	0.070488274	0.033824906	0.07897645	0.63030036	0.138818735	0.071250332	0.159630573	0.036833905	0.657760261	0.129262476	0.017729756	0.158413602	0.060789139	0.642860349	0.067742623	0.228607888	0.050202104	0.526661933	0.103117274	0.320018688	0.068734394	0.556354945	0.031804694	0.343105968	0.107641186	0.047607309	0.015516104	0.230289745	0.386527304	0.01678996	0.19562839
2. CVD Fall	1	Men	2009	89	0.788815339	0.029518847	0.001694134	0.052582462	0.063582793	0.003360479	0.060445945	0.698072895	0.118338033	0.073141169	0.032601173	0.077846729	0.645686788	0.129924905	0.068055811	0.156332495	0.039562511	0.680539116	0.107587423	0.017155186	0.155155764	0.068096165	0.644487171	0.064759887	0.222656777	0.051892325	0.540922347	0.09774646	0.309438868	0.066340555	0.571831045	0.030669053	0.331159348	0.122278356	0.047498861	0.00997683	0.163606639	0.449353001	0.016249559	0.191036754
2. CVD Fall	1	Men	2009	90	0.69287995	0.027845558	0.002764584	0.087551365	0.076778299	0.005743616	0.106436629	0.638237624	0.091738853	0.077869773	0.055285167	0.136868584	0.467975247	0.144709886	0.114325479	0.272989389	0.044197277	0.549546787	0.106081249	0.02921246	0.270962227	0.065891004	0.438643814	0.10888378	0.386581402	0.051031631	0.252784514	0.162920946	0.533262909	0.070304494	0.308024863	0.052035553	0.56963509	0.129625176	0.033560875	0.022060916	0.374562697	0.079924197	0.027677055	0.332589084
2. CVD Fall	1	Men	2009	91	0.703303064	0.030127726	0.002570439	0.07604067	0.0770701	0.005592845	0.105295156	0.614166122	0.136150581	0.061114747	0.053386686	0.135181863	0.511922493	0.111070685	0.109317264	0.267689559	0.0371727	0.519161338	0.149602612	0.028333188	0.265730163	0.077597882	0.441375137	0.104208107	0.376818874	0.048763332	0.280870173	0.154536942	0.515829554	0.055330808	0.34442116	0.050276061	0.549971971	0.147540297	0.05593876	0.007703781	0.113343889	0.323512044	0.026850941	0.325110288
2. CVD Fall	1	Men	2009	92	0.652095211	0.036270842	0.005357101	0.12333292	0.073197944	0.005454854	0.104291129	0.59311208	0.147406355	0.074208609	0.051610125	0.133662831	0.510388093	0.122331584	0.104599603	0.26268072	0.05370873	0.519242689	0.138743851	0.027517593	0.260787137	0.06404084	0.468674795	0.099804097	0.367480268	0.049639816	0.304591767	0.14665618	0.499112237	0.05303216	0.367208835	0.048630935	0.53112807	0.128674167	0.067784209	0	0	0.459471057	0.026085185	0.317985383
2. CVD Fall	1	Men	2009	93	0.682728379	0.042608215	0.00471051	0.094838036	0.066357468	0.005329572	0.10342782	0.617683151	0.126862701	0.073186824	0.049952728	0.132314596	0.470598407	0.17127343	0.100163953	0.25796421	0.049292102	0.541622175	0.126186524	0.026764691	0.256134508	0.070555599	0.475213599	0.095663866	0.358566935	0.046021256	0.331603626	0.139261749	0.48311337	0.068128983	0.371667948	0.047097671	0.513105398	0.13317999	0.057473293	0.01134646	0.153525677	0.307880226	0.025378884	0.31121547
2. CVD Fall	1	Men	2009	94	0.639698934	0.052722783	0.006274633	0.100079737	0.093298328	0.005216963	0.102708622	0.548286948	0.194172298	0.077988582	0.048411859	0.131140313	0.538662542	0.111794525	0.096001855	0.253541078	0.068131859	0.508415844	0.145605355	0.026073597	0.251773346	0.060772317	0.4973684	0.091779628	0.350079655	0.037444932	0.362384636	0.132336668	0.467833764	0.05735881	0.401063382	0.045673881	0.495903928	0.121125498	0.054472184	0.007735826	0.116618359	0.37051566	0.024731237	0.304801237
2. CVD Fall	1	Men	2009	95	0.660308075	0.045386746	0.005048599	0.095051817	0.086950719	0.005117025	0.102137019	0.645835004	0.105186058	0.071850821	0.04698498	0.130143136	0.507447211	0.151035895	0.092104897	0.249411997	0.078578214	0.47694945	0.171324467	0.02544352	0.247704349	0.060490585	0.509347256	0.088143653	0.342018506	0.04680292	0.374060759	0.12586386	0.453272462	0.039927558	0.436193746	0.044357277	0.479521419	0.126361721	0.062958076	0.024301617	0.254196007	0.209298194	0.024141533	0.298742851
2. CVD Fall	1	Men	2009	96	0.603511175	0.043994523	0.007364162	0.136022727	0.102361065	0.00502979	0.101716559	0.530750722	0.213179285	0.081074185	0.045669634	0.129326174	0.477210701	0.188747449	0.088464673	0.245577177	0.072429263	0.488452318	0.170316904	0.024873755	0.24392776	0.060924956	0.51994406	0.084748227	0.334382757	0.026823143	0.413924143	0.119826132	0.439426582	0.057822122	0.435078947	0.04314565	0.463953281	0.112761788	0.051157141	0.043226877	0.414762495	0.061442691	0.023609148	0.29303986
2. CVD Fall	1	Men	2009	97	0.602793783	0.04020327	0.006632196	0.134974091	0.108990521	0.004955324	0.101450816	0.485333195	0.254914265	0.086596684	0.044463416	0.128692439	0.513332344	0.159558626	0.085072754	0.242036276	0.078146034	0.518504731	0.138542289	0.024363671	0.240443274	0.070863052	0.520380575	0.081585625	0.327170748	0.026676097	0.432826518	0.114206175	0.42629121	0.04975828	0.45901239	0.042036853	0.449192477	0.126341756	0.09385296	0.007749618	0.068524216	0.392706827	0.02313353	0.287691092
2. CVD Fall	1	Men	2009	98	0.515453882	0.039100874	0.010623142	0.203018929	0.125566098	0.004893728	0.101343349	0.447199438	0.309202104	0.071989712	0.043363959	0.128244787	0.568939619	0.11035141	0.081920655	0.238788316	0.068214668	0.524525127	0.146097543	0.023912708	0.237249954	0.066366302	0.534605822	0.078648074	0.320379801	0.049244372	0.427909743	0.108986567	0.413859317	0.041859251	0.481882493	0.041028776	0.43522948	0.134427551	0.057209137	0.032835729	0.331823918	0.138294897	0.022714198	0.28269457
2. CVD Fall	1	Men	2009	99	0.605278428	0.042230572	0.005914893	0.116939732	0.123393579	0.004845139	0.101397657	0.464643177	0.266965795	0.098036264	0.042368906	0.127985857	0.508261039	0.176907543	0.078999815	0.235831604	0.071925205	0.541609445	0.128598837	0.023520357	0.234346155	0.074338979	0.535727151	0.075927737	0.314006133	0.050409877	0.443318602	0.104149797	0.402121724	0.072049848	0.465778561	0.040119328	0.422052263	0.116943665	0.08810305	0.003676558	0.036381993	0.454496582	0.022350729	0.278047423
2. CVD Fall	1	Men	2009	100	0.410595705	0.038893323	0.017758249	0.295706116	0.130619746	0.00480973	0.10161713	0.473452358	0.255708234	0.101445508	0.041475894	0.127918006	0.516987752	0.173547013	0.076301583	0.233163652	0.084128122	0.484214704	0.176741571	0.02318616	0.231729443	0.06081095	0.557727574	0.073416687	0.308044788	0.038230262	0.47102435	0.099678291	0.391067098	0.059306589	0.491740647	0.039306415	0.40964635	0.117939883	0.072561415	0.009500315	0.106270031	0.397939786	0.022042748	0.273745822
2. CVD Fall	1	Men	2010	35	0.991522902	0.002164029	0	0	0.003113834	0.000173674	0.003025561	0.98127198	0	0.012863246	0.001885118	0.003979655	0.966555747	0.020003687	0.004597824	0.008842742	0	0.990304427	0	0.000933376	0.008762197	0.040154371	0.941698677	0.004307727	0.013839225	0	0.970222005	0.00768768	0.022090315	0	0.973686581	0.001759577	0.024553842	0.067008055	0.003933261	0	0	0.916838138	0.000881051	0.011339495
2. CVD Fall	1	Men	2010	36	0.992124638	0.001830361	0	0	0.002926807	0.00016646	0.002951734	0.970667104	0	0.02364401	0.001806466	0.00388242	0.964535118	0.022435001	0.004404621	0.00862526	0	0.990558751	0	0.00089453	0.008546719	0.060724474	0.921652112	0.004126851	0.013496563	0	0.971100656	0.007362035	0.021537309	0	0.974376655	0.001686187	0.023937158	0.080636751	0.004498482	0	0	0.902960711	0.000844388	0.011059667
2. CVD Fall	1	Men	2010	37	0.990819344	0.002957811	0	0	0.003183582	0.000159547	0.002879716	0.97445769	0	0.020023671	0.001731075	0.003787563	0.98286982	0.004497761	0.004219394	0.008413024	0	0.990806261	0	0.000857299	0.008336441	0.094389678	0.888494822	0.003953446	0.013162054	0	0.971953062	0.007049767	0.020997171	0	0.975049427	0.001615841	0.023334731	0.072223124	0.003542991	0	0	0.912638093	0.000809249	0.010786543
2. CVD Fall	1	Men	2010	38	0.990865908	0.003032978	0	0	0.003138726	0.000152921	0.002809466	0.968305949	0	0.026340212	0.001658812	0.003695027	0.952438396	0.035313887	0.004041811	0.008205905	0	0.991047153	0	0.000821614	0.008131233	0.09135525	0.892022058	0.003787201	0.012835492	0	0.972780119	0.006750317	0.020469564	0	0.975705403	0.001548414	0.022746183	0.07896948	0.006065753	0	0	0.903669241	0.00077557	0.010519956
2. CVD Fall	1	Men	2010	39	0.989965445	0.00297476	0	0	0.004172284	0.000146571	0.00274094	0.981534285	0	0.013271415	0.001589545	0.003604755	0.965487095	0.022637573	0.003871554	0.008003778	0	0.991281615	0	0.000787412	0.007930973	0.079816579	0.904038927	0.003627817	0.012516676	0	0.973582693	0.006463151	0.019954157	0	0.976345073	0.001483784	0.022171143	0.06159259	0.006731381	0	0	0.920672996	0.00074329	0.010259742
2. CVD Fall	1	Men	2010	40	0.990672474	0.002612479	0	0	0.002755016	0.000257021	0.00370301	0.976492941	0	0.015850613	0.002786635	0.004869811	0.964933368	0.017471967	0.006784437	0.010810227	0	0.987907454	0	0.001380613	0.010711932	0.077374033	0.899366694	0.006357597	0.016901676	0	0.961744758	0.011320616	0.026934626	0	0.967474907	0.002601273	0.02992382	0.076017466	0.007854519	0	0	0.900969109	0.001303262	0.013855644
2. CVD Fall	1	Men	2010	41	0.987685725	0.003076716	0	0	0.00537848	0.000246351	0.003612728	0.979387021	0	0.013191919	0.002670202	0.004750858	0.9676927	0.015265552	0.006498101	0.010543646	0	0.988229051	0	0.001323133	0.010447816	0.095910557	0.881519047	0.006089562	0.016480834	0	0.962909228	0.010837411	0.026253361	0	0.968343924	0.002492637	0.029163439	0.080338773	0.004823856	0	0	0.900076053	0.001249013	0.013512305
2. CVD Fall	1	Men	2010	42	0.988390677	0.00352763	0	0	0.004320899	0.000236125	0.003524669	0.974552032	0	0.018254546	0.002558599	0.004634824	0.944362951	0.039130007	0.006223563	0.010283479	0	0.9885419	0	0.001268042	0.010190058	0.065269534	0.912827964	0.005832578	0.016069923	0	0.964038342	0.010373981	0.025587677	0	0.969191202	0.002388507	0.028420292	0.070878336	0.00701682	0	0	0.907730679	0.001197019	0.013177146
2. CVD Fall	1	Men	2010	43	0.987610083	0.003203675	0	0	0.005521134	0.000226325	0.003438783	0.975044949	0	0.017981789	0.002451622	0.004521639	0.957200492	0.026809608	0.00596033	0.01002957	0	0.988846257	0	0.001215242	0.009938501	0.09816903	0.880576095	0.005586185	0.01566869	0	0.965133341	0.009929501	0.024937158	0	0.970017394	0.002288696	0.02769391	0.089442116	0.005985256	0	0	0.890575476	0.001147187	0.012849964
2. CVD Fall	1	Men	2010	44	0.987285729	0.003499861	0	0	0.005642459	0.000216934	0.003355018	0.958628958	0	0.034610721	0.002349082	0.004411238	0.974883335	0.009626967	0.005707932	0.009781766	0	0.989142369	0	0.001164637	0.009692994	0.077160349	0.90221282	0.005349941	0.01527689	0	0.966195423	0.009503182	0.024301395	0	0.970823137	0.002193026	0.026983837	0.078773884	0.007389366	0	0	0.900206762	0.001099428	0.01253056
2. CVD Fall	1	Men	2010	45	0.985041243	0.004008301	0	0	0.00597864	0.000372738	0.004599078	0.966842769	0	0.023075936	0.004034726	0.006046569	0.970770468	0.006027691	0.009798092	0.013403749	0	0.984717059	0	0.002000764	0.013282178	0.060398332	0.909490801	0.009184143	0.020926724	0	0.950427013	0.016302188	0.033270799	0	0.959295828	0.003766789	0.036937383	0.066748909	0.008676812	0	0	0.905517978	0.00188876	0.017167541
2. CVD Fall	1	Men	2010	46	0.983775785	0.004310159	0	0	0.007069635	0.000357278	0.004487143	0.969752715	0	0.020482438	0.003865843	0.005899003	0.94314043	0.034405353	0.009382107	0.01307211	0	0.985128939	0	0.00191744	0.012953621	0.064604032	0.906199421	0.008794809	0.020401739	0	0.951983585	0.015599071	0.032417344	0	0.960407094	0.003609226	0.035983679	0.064530304	0.007623607	0	0	0.909296149	0.001810123	0.016739818
2. CVD Fall	1	Men	2010	47	0.985119397	0.004056914	0	0	0.006103237	0.000342463	0.004377988	0.973218312	0	0.017322642	0.003703964	0.005755082	0.963081102	0.015187239	0.008983221	0.012748437	0	0.985529457	0	0.001837584	0.01263296	0.073689086	0.898000402	0.008421493	0.01988902	0	0.953492407	0.014924608	0.031582985	0	0.961490746	0.003458201	0.035051053	0.077798879	0.009899692	0	0	0.894244444	0.001734759	0.016322226
2. CVD Fall	1	Men	2010	48	0.984532067	0.004216552	0	0	0.006651564	0.000328267	0.004271551	0.964837012	0	0.025999468	0.003548799	0.005614721	0.951174017	0.027792721	0.008600725	0.012432537	0	0.985918946	0	0.001761051	0.012320002	0.077686944	0.894861272	0.00806353	0.019388254	0	0.954955191	0.014277606	0.030767203	0	0.962547636	0.003313442	0.034138922	0.081800353	0.009936689	0	0	0.890685913	0.001662532	0.015914513
2. CVD Fall	1	Men	2010	49	0.983332526	0.00506742	0	0	0.007117621	0.000314664	0.004167769	0.966321529	0	0.024800559	0.003400071	0.005477841	0.94675045	0.03289139	0.008233938	0.012124222	0	0.98629773	0	0.001687706	0.012014564	0.064940978	0.908439599	0.007720283	0.01889914	0	0.956373584	0.013656924	0.029969492	0	0.96357859	0.003174691	0.033246719	0.08448648	0.008722586	0	0	0.889681185	0.001593314	0.015516435
2. CVD Fall	1	Men	2010	50	0.970770012	0.005453741	5.09E-05	0.009187864	0.00783585	0.000513121	0.006188556	0.944078313	0.023084172	0.019162859	0.005541569	0.008133086	0.934714102	0.033884163	0.013408942	0.017992792	0.006754511	0.958517447	0.014146358	0.002751493	0.017830191	0.067011028	0.892381637	0.012573558	0.028033777	0.074899961	0.858459752	0.022219724	0.044420563	0.076981159	0.868577605	0.005174436	0.0492668	0.076301482	0.009722319	0.000207636	0.020702468	0.867446932	0.002597646	0.023021517
2. CVD Fall	1	Men	2010	51	0.974489312	0.00630087	2.93E-05	0.00459596	0.008054266	0.000491875	0.006038439	0.957264611	0.005886046	0.023605204	0.005309118	0.00793502	0.965289218	0.004329777	0.012835144	0.01754586	0.008171255	0.960478043	0.011326359	0.002636903	0.017387441	0.074482182	0.886157622	0.012036636	0.027323561	0.03464342	0.90084931	0.021247896	0.043259375	0.120260775	0.826814445	0.004957589	0.047967191	0.077642058	0.009934612	8.03E-06	0.000799337	0.886682492	0.002489506	0.022443967
2. CVD Fall	1	Men	2010	52	0.979014178	0.00562261	5.88E-06	0.001038701	0.007955008	0.000471519	0.005892105	0.947557095	0.014407865	0.02520682	0.005086316	0.007741904	0.938679271	0.031926181	0.012284883	0.017109665	0.00703294	0.963002212	0.010482422	0.002527092	0.016955334	0.06051893	0.901329546	0.011521763	0.026629761	0.076278936	0.86128206	0.020315503	0.042123501	0.095224008	0.853330789	0.004749749	0.046695454	0.084015622	0.01253705	9.03E-05	0.007061476	0.872029643	0.002385877	0.021880024
2. CVD Fall	1	Men	2010	53	0.97427165	0.006888484	2.28E-05	0.003274188	0.009341404	0.000452016	0.005749472	0.955595208	0.007181637	0.024796757	0.004872766	0.007553632	0.951870585	0.019688277	0.011757185	0.016683953	0.008224302	0.963109548	0.009710668	0.002421863	0.016533619	0.082090888	0.880929119	0.011028028	0.025951965	0.066870504	0.872696328	0.019420917	0.041012251	0.084208572	0.865790065	0.004550545	0.045450819	0.085350369	0.013819802	0.000192442	0.013541383	0.863480075	0.002286575	0.021329354
2. CVD Fall	1	Men	2010	54	0.97485268	0.007168413	1.77E-05	0.002448977	0.009468411	0.000433331	0.005610463	0.963514803	0.001761572	0.022685441	0.004668086	0.007370098	0.941292229	0.031188174	0.011251118	0.016268479	0.010279621	0.957169314	0.014107981	0.00232103	0.016122054	0.085810581	0.87834509	0.010554558	0.025289772	0.061302697	0.880209765	0.018562581	0.039924957	0.076193998	0.875213843	0.004359621	0.044232537	0.080562549	0.01271299	0	0	0.883741403	0.002191421	0.020791637
2. CVD Fall	1	Men	2010	55	0.964366507	0.007372677	6.49E-05	0.008664268	0.010038185	0.000671921	0.008821518	0.95158643	0.001495352	0.028098592	0.007232904	0.011586722	0.914803382	0.042224911	0.017412666	0.025559041	0.009555874	0.949090823	0.01242625	0.003597779	0.025329273	0.07607517	0.867882838	0.016336649	0.039705343	0.067861084	0.840833543	0.028691194	0.062614179	0.083617192	0.84028009	0.006755326	0.069347392	0.089982959	0.014793731	0	0	0.859172155	0.003396953	0.032654202
2. CVD Fall	1	Men	2010	56	0.963930682	0.007598415	5.70E-05	0.007394178	0.011766633	0.000644187	0.008608862	0.954561278	0.004112684	0.02309143	0.006928807	0.011305801	0.915927538	0.042491128	0.016659858	0.024921477	0.010371384	0.947221528	0.01426131	0.003448047	0.024697731	0.07343876	0.872242011	0.015632413	0.038686816	0.109257196	0.802393351	0.027413054	0.0609364	0.084602527	0.841459863	0.006471685	0.067465925	0.08866456	0.01361789	0.000533299	0.037152519	0.824948012	0.003255658	0.031828061
2. CVD Fall	1	Men	2010	57	0.960421858	0.007278039	8.39E-05	0.011309287	0.011887621	0.000617622	0.008401698	0.947743916	0.011673197	0.02291347	0.006637365	0.011032052	0.92173885	0.038023954	0.015937893	0.024299302	0.008668198	0.944733741	0.019212025	0.003304587	0.024081448	0.05769838	0.889652937	0.014957072	0.037691611	0.072387231	0.842131939	0.026186631	0.059294199	0.07822986	0.849946735	0.006199858	0.065623547	0.074915373	0.015125309	0.00042655	0.02700103	0.848390122	0.003120285	0.031021331
2. CVD Fall	1	Men	2010	58	0.959866058	0.007629252	8.21E-05	0.010561933	0.013068581	0.000592178	0.008199919	0.928923823	0.026604938	0.027347847	0.006358061	0.010765331	0.898045838	0.063016479	0.015245508	0.023692175	0.012637639	0.942411841	0.018303292	0.003167145	0.023480083	0.067510983	0.881460413	0.014309443	0.036719161	0.064807978	0.85249556	0.025009822	0.05768664	0.099134665	0.831106753	0.005939363	0.063819218	0.093217965	0.016750651	8.10E-06	0.000475099	0.856324035	0.002990593	0.03023356
2. CVD Fall	1	Men	2010	59	0.960015945	0.008142762	8.01E-05	0.009655769	0.013534233	0.00056781	0.008003425	0.935026324	0.018844842	0.029532929	0.006090402	0.010505504	0.926911438	0.035407303	0.014581495	0.023099764	0.011636174	0.946978218	0.015456823	0.003035476	0.02289331	0.065073151	0.885469535	0.013688393	0.035768921	0.045577379	0.874429178	0.02388062	0.056112823	0.075884585	0.856373735	0.005689738	0.062051941	0.085994121	0.014373378	5.75E-05	0.003927582	0.863316752	0.00286635	0.029464309
2. CVD Fall	1	Men	2010	60	0.963484406	0.007986852	2.37E-05	0.002931339	0.012548216	0.000845953	0.012179562	0.925416063	0.020928085	0.028607492	0.009064191	0.015984168	0.892984981	0.050236284	0.021665973	0.035112763	0.008660018	0.931568451	0.020451771	0.004520272	0.034799489	0.076605461	0.848733886	0.020342433	0.05431822	0.052715031	0.826784103	0.035420019	0.085080847	0.08668201	0.810805756	0.008468545	0.094043689	0.095544039	0.015057773	0.000299797	0.019221345	0.820842952	0.004268557	0.044765537
2. CVD Fall	1	Men	2010	61	0.954620869	0.008596756	7.99E-05	0.009123743	0.014878289	0.000811237	0.011889251	0.942760052	0.003013583	0.029944048	0.008682339	0.015599978	0.907602772	0.037446494	0.020717151	0.034233583	0.011280191	0.929781524	0.020676996	0.004332565	0.033928724	0.064020549	0.863620756	0.019455126	0.052903569	0.060817321	0.822649552	0.033804706	0.082728421	0.094669331	0.805818666	0.008112454	0.091399549	0.085277626	0.015004631	0	0	0.852004257	0.004091446	0.043622039
2. CVD Fall	1	Men	2010	62	0.955231091	0.008280208	6.70E-05	0.007957765	0.016079201	0.000777999	0.011606752	0.935886005	0.009246594	0.031324973	0.008316471	0.015225958	0.883943002	0.062873809	0.019807263	0.033375926	0.011989886	0.926643964	0.02413406	0.004152788	0.033079302	0.07430441	0.855570113	0.018604292	0.051521185	0.044478914	0.842841491	0.032254831	0.080424763	0.094383706	0.809036065	0.007771285	0.088808944	0.088790747	0.018807749	0.000320978	0.016458903	0.829194273	0.00392182	0.042505531
2. CVD Fall	1	Men	2010	63	0.950678895	0.009694547	0.0001005	0.010159827	0.017288108	0.000746182	0.01133194	0.92955815	0.014140724	0.033473247	0.007965943	0.014861936	0.90575251	0.042773388	0.018934744	0.032539358	0.012263191	0.925374839	0.026130553	0.003980623	0.032250794	0.068520482	0.863520706	0.017788461	0.050170351	0.042567388	0.848496079	0.030767812	0.078168722	0.077265333	0.829019609	0.007444439	0.086270619	0.088004627	0.018592054	0.000338605	0.017547964	0.830341934	0.003759381	0.041415435
2. CVD Fall	1	Men	2010	64	0.9527987	0.00970079	9.13E-05	0.009227687	0.016401147	0.000715728	0.011064697	0.918527507	0.02046216	0.038872438	0.007630144	0.014507752	0.896703982	0.05347445	0.018098099	0.03172347	0.012928145	0.930060272	0.02175302	0.003815769	0.031442794	0.068741393	0.86540199	0.017006235	0.048850382	0.085564864	0.809134735	0.029341187	0.075959214	0.093854389	0.815230871	0.007131344	0.083783397	0.100037721	0.019391467	0.000324505	0.01613448	0.820156777	0.003603844	0.040351205
2. CVD Fall	1	Men	2010	65	0.944935215	0.010023226	9.81E-05	0.009593946	0.017071523	0.001114468	0.017163525	0.916085021	0.014293024	0.035260556	0.011863173	0.022498226	0.85572652	0.067069986	0.028074799	0.049128696	0.012548918	0.909791909	0.023026482	0.00593758	0.048695111	0.070129421	0.827933602	0.026387269	0.075549708	0.067465214	0.769906313	0.045405296	0.117223177	0.08367636	0.776016967	0.01108885	0.129217824	0.093642148	0.019210729	0.000541191	0.026858219	0.791692312	0.005608069	0.062447332
2. CVD Fall	1	Men	2010	66	0.941112868	0.010209989	0.000112716	0.010806476	0.019926195	0.001069207	0.01676255	0.91512009	0.01608294	0.035467706	0.011363104	0.02196616	0.859095763	0.066181319	0.026826377	0.04789654	0.014073689	0.900727607	0.032031409	0.005692333	0.047474962	0.078080879	0.823150924	0.025220232	0.073547965	0.065420662	0.777448384	0.043274438	0.113856517	0.079282127	0.784671033	0.01062265	0.12542419	0.099190003	0.01934186	0	0	0.815254889	0.005376697	0.06083655
2. CVD Fall	1	Men	2010	67	0.938663532	0.011566683	0.00014028	0.011842299	0.020388177	0.001025911	0.016373117	0.918860283	0.012233486	0.036572959	0.010884216	0.021449056	0.876018107	0.051656851	0.025629559	0.046695483	0.014427111	0.901493151	0.032336471	0.005457608	0.046285659	0.065107949	0.839198201	0.024101523	0.071592327	0.053048239	0.795161709	0.041230752	0.1105593	0.086469979	0.781646831	0.010176227	0.121706963	0.093854444	0.01934959	0.000443038	0.021940959	0.799992197	0.00515526	0.059264512
2. CVD Fall	1	Men	2010	68	0.936488277	0.011518896	0.000148603	0.0125879	0.022276721	0.000984506	0.015995096	0.904308239	0.023665464	0.040653887	0.010425682	0.020946728	0.866093451	0.063899199	0.024482338	0.045525012	0.016093301	0.900086215	0.033460792	0.005232997	0.045126696	0.067539518	0.839749283	0.02302926	0.069681938	0.064309814	0.789088938	0.039270971	0.107330278	0.081463732	0.790722617	0.00974881	0.118064841	0.093825743	0.019598148	0.000377468	0.018518955	0.805005786	0.004943372	0.057730529
2. CVD Fall	1	Men	2010	69	0.937347783	0.010809702	0.000153348	0.01383435	0.021281529	0.000944919	0.01562837	0.907329142	0.018056134	0.044169003	0.009986713	0.020459008	0.863105127	0.069127419	0.023382803	0.044384651	0.015992645	0.897044017	0.037947626	0.005018111	0.043997601	0.079321016	0.830861332	0.022001649	0.067816003	0.061737763	0.796701924	0.037391988	0.104168326	0.054378197	0.821785462	0.009339662	0.114496679	0.105819145	0.022290168	0	0	0.81091606	0.004740667	0.05623396
2. CVD Fall	1	Men	2010	70	0.922095801	0.011785089	0.000186132	0.015362188	0.024070652	0.001577826	0.024922312	0.887972313	0.019505989	0.043268258	0.01664057	0.03261287	0.814350657	0.076194154	0.03884046	0.070614728	0.018355918	0.863729692	0.039541998	0.008371256	0.070001136	0.069114063	0.78663882	0.036558033	0.107689083	0.038183389	0.73497735	0.061908586	0.164930674	0.084444811	0.718857491	0.015564762	0.181132936	0.096731028	0.02135624	0.000421873	0.018949569	0.765251446	0.007908934	0.089380909
2. CVD Fall	1	Men	2010	71	0.917249914	0.012279524	0.000232011	0.018311779	0.026051556	0.001514942	0.024360273	0.888476704	0.02453824	0.039179859	0.015941213	0.031863984	0.832753729	0.06131178	0.037084426	0.068850064	0.012642003	0.873381891	0.037692604	0.00802941	0.068254092	0.068416113	0.791880934	0.034917124	0.104785829	0.047543495	0.733565118	0.058906154	0.159985233	0.071093934	0.73844586	0.014913028	0.175547178	0.091838396	0.022943975	0	0	0.790573055	0.007586495	0.08705808
2. CVD Fall	1	Men	2010	72	0.918106324	0.01304072	0.000237829	0.017672916	0.025671086	0.001454883	0.023816243	0.885934736	0.024381842	0.043272967	0.015272152	0.031138303	0.838075549	0.059389577	0.035402302	0.067132572	0.017813571	0.86621694	0.041712996	0.007702643	0.06655385	0.0651247	0.799578066	0.033345398	0.101951835	0.062422423	0.726402883	0.056029659	0.155145035	0.067503389	0.748128973	0.014289587	0.170078051	0.108793129	0.024997642	0	0	0.774137291	0.007278295	0.084793643
2. CVD Fall	1	Men	2010	73	0.909038371	0.0134244	0.000333389	0.023899386	0.028616774	0.001397547	0.023290133	0.878146812	0.034501351	0.042283894	0.014632261	0.030435682	0.820173651	0.080573259	0.033791366	0.065461724	0.016855756	0.86671288	0.044141074	0.007390403	0.064899886	0.071378192	0.797595288	0.031840299	0.099186221	0.055079124	0.741237029	0.053274725	0.150409122	0.076059375	0.745522504	0.013693389	0.164724731	0.098896602	0.02652168	0.000726561	0.02593794	0.758346531	0.006983813	0.082586873
2. CVD Fall	1	Men	2010	74	0.912779466	0.014235624	0.000264202	0.017956815	0.030639171	0.001342838	0.022781883	0.876929643	0.034104805	0.045189076	0.014020468	0.029756008	0.843795756	0.060118156	0.032249034	0.063837053	0.022375314	0.868590257	0.038650523	0.007092164	0.063291743	0.074732975	0.798379414	0.030399398	0.096488214	0.059094016	0.744492015	0.050637205	0.145776763	0.074783921	0.75260598	0.013123434	0.159486665	0.100149442	0.024126356	0.002118749	0.078610556	0.707855211	0.006702554	0.080437132
2. CVD Fall	1	Men	2010	75	0.885155765	0.014332731	0.000398821	0.026673749	0.034130325	0.002284905	0.037023703	0.864093442	0.020774694	0.043015494	0.023785743	0.048330626	0.759111089	0.083006703	0.054478149	0.103404059	0.022366249	0.809949345	0.053107782	0.012051404	0.10252522	0.065210759	0.727526974	0.051375709	0.155886557	0.03781524	0.642411786	0.085176256	0.234596717	0.072001092	0.649349153	0.022268597	0.256381159	0.107110136	0.027298786	0.000492739	0.017237085	0.70635019	0.011390397	0.130120667
2. CVD Fall	1	Men	2010	76	0.889987589	0.016926747	0.000373067	0.021191745	0.033085201	0.002196879	0.036238771	0.840150901	0.040889881	0.048884715	0.022796842	0.04727766	0.778720772	0.06844427	0.051977804	0.100857154	0.022326128	0.815078814	0.05102006	0.011570396	0.100004601	0.062292596	0.7370404	0.049040103	0.151626901	0.05168485	0.640168284	0.080902174	0.227244693	0.080502945	0.650086373	0.021347551	0.248063131	0.102909089	0.031889149	9.87E-05	0.002987858	0.724441354	0.01093684	0.126736977
2. CVD Fall	1	Men	2010	77	0.877891119	0.016825391	0.000511785	0.029007717	0.038167452	0.002113047	0.035483489	0.835944999	0.047072481	0.048867367	0.021852554	0.046262599	0.775441653	0.076586552	0.049586532	0.098385263	0.0169574	0.819061354	0.055311152	0.011111668	0.097558425	0.076006516	0.729710209	0.046806514	0.147476761	0.059908027	0.643212615	0.076816129	0.220063229	0.074995386	0.664600073	0.020468179	0.239936361	0.1004845	0.031247604	0	0	0.734317924	0.010504329	0.123445644
2. CVD Fall	1	Men	2010	78	0.884138447	0.016671254	0.000457034	0.026225943	0.035716094	0.002033275	0.034757953	0.856823229	0.026400656	0.050539281	0.020951343	0.045285491	0.778866955	0.077844382	0.047300627	0.095988035	0.024625685	0.80484181	0.064671681	0.010674474	0.09518635	0.066846439	0.745046534	0.044671458	0.143435569	0.062731836	0.651303429	0.072912176	0.213052559	0.073479692	0.674889642	0.019629051	0.232001616	0.113912735	0.036099588	0	0	0.71964936	0.010092158	0.120246159
2. CVD Fall	1	Men	2010	79	0.872898639	0.018424791	0.000615477	0.031709554	0.040331793	0.001957437	0.034062309	0.838433213	0.046674075	0.050454508	0.020091755	0.044346449	0.769659309	0.091558896	0.04511657	0.093665226	0.025395224	0.8172165	0.054242033	0.01025811	0.092888134	0.075666332	0.742199108	0.042631628	0.139502932	0.063066834	0.661535256	0.069184659	0.206213251	0.048242027	0.708669128	0.018828812	0.224260032	0.107333126	0.032343564	0.002795963	0.076771502	0.653918034	0.009699667	0.117138144
2. CVD Fall	1	Men	2010	80	0.840747384	0.021829566	0.000892686	0.038394169	0.036847104	0.003448935	0.057840156	0.794713677	0.048119524	0.046668398	0.035254483	0.075243917	0.673632947	0.089326225	0.078715424	0.158325405	0.026557471	0.747321491	0.051059733	0.018040117	0.157021187	0.075341314	0.615253755	0.074421872	0.234983058	0.046391503	0.487960856	0.120051779	0.345595862	0.063631099	0.527993552	0.033047954	0.375327396	0.112015386	0.043001139	0	0	0.630275446	0.017060207	0.197647822
2. CVD Fall	1	Men	2010	81	0.836114392	0.023727693	0.000972093	0.038384224	0.040737584	0.003323965	0.056740049	0.780337736	0.054292148	0.057792721	0.033826946	0.073750448	0.676808848	0.093556649	0.075074807	0.154559695	0.03478726	0.72448509	0.070080366	0.017351122	0.153296162	0.080172	0.620258855	0.071021939	0.228547206	0.047395271	0.504405802	0.113849529	0.334349398	0.060936075	0.544747469	0.031719487	0.362596969	0.10516946	0.034550404	0.001026107	0.027816156	0.622446202	0.016410876	0.192580796
2. CVD Fall	1	Men	2010	82	0.823159599	0.021285517	0.001026756	0.044990807	0.050638689	0.003205589	0.055693042	0.800276779	0.039549468	0.055381195	0.032468422	0.072324135	0.688706185	0.088768092	0.071603105	0.150922618	0.02864677	0.729522254	0.075435337	0.016696814	0.149698824	0.070521739	0.639399405	0.067779856	0.222299001	0.043138985	0.525513578	0.107941772	0.323405665	0.055814293	0.563519919	0.030455523	0.350210265	0.114635557	0.045180007	0.00202403	0.040854299	0.593840235	0.015794326	0.187671545
2. CVD Fall	1	Men	2010	83	0.83584931	0.024515879	0.000901488	0.034565908	0.046374009	0.003093634	0.054699771	0.769496898	0.065980064	0.062380638	0.031176798	0.070965603	0.671674084	0.112616421	0.06829509	0.147414404	0.033817646	0.725212248	0.078664499	0.016076197	0.14622941	0.074068978	0.64500148	0.064690717	0.216238825	0.052507318	0.532405359	0.102319865	0.312767458	0.066769666	0.565805059	0.029254099	0.338171175	0.120488283	0.036205772	0.006584124	0.147286874	0.491305073	0.015209621	0.182920252
2. CVD Fall	1	Men	2010	84	0.833216893	0.028279853	0.000747723	0.025011336	0.055995284	0.002987943	0.053760968	0.776630774	0.066369055	0.057374504	0.029950081	0.069675585	0.68334652	0.107472267	0.065145787	0.144035425	0.033006237	0.710940534	0.097676596	0.01548834	0.142888293	0.077798364	0.650084506	0.061749855	0.210367275	0.046874257	0.553712407	0.096975479	0.302437858	0.061594706	0.583808085	0.028113365	0.326483844	0.108900862	0.03958099	0.00511228	0.10927363	0.544149077	0.014655886	0.178327274
2. CVD Fall	1	Men	2010	85	0.825276138	0.030749306	0.000755435	0.023223021	0.052770351	0.003622916	0.063602833	0.762539074	0.076006944	0.043006985	0.03610706	0.082339937	0.648871081	0.103830535	0.07795592	0.169342464	0.032658794	0.692138541	0.088465765	0.018729826	0.168007075	0.080453091	0.599399476	0.073945109	0.246202324	0.045118937	0.487876275	0.115271764	0.351733024	0.077787153	0.509230507	0.033905976	0.379076364	0.121497121	0.042398482	0.009170275	0.168655899	0.4313873	0.017726292	0.209164632
2. CVD Fall	1	Men	2010	86	0.749175947	0.033980142	0.003539587	0.090799764	0.056391268	0.003505542	0.06260775	0.718104544	0.105778025	0.060436917	0.034724288	0.080956226	0.639595929	0.120426873	0.074386276	0.165590922	0.046630743	0.672266462	0.098732486	0.018071474	0.164298836	0.096424255	0.593367314	0.070611857	0.239596573	0.036861115	0.513841902	0.109234397	0.340062587	0.068234144	0.533264712	0.032620972	0.365880173	0.109044052	0.059700079	0.004917343	0.071181991	0.534027225	0.017106447	0.204022864
2. CVD Fall	1	Men	2010	87	0.758844999	0.026460146	0.002549477	0.085334349	0.061733963	0.00339554	0.061681526	0.740023489	0.088648258	0.058253663	0.033416278	0.079658311	0.653073146	0.113931267	0.07099861	0.161996977	0.025471225	0.691337293	0.104993213	0.01745119	0.160747079	0.078921183	0.620409223	0.067448597	0.233220996	0.034910442	0.532798525	0.103515593	0.328775441	0.052473616	0.562997936	0.031405929	0.353122519	0.113377276	0.025704574	0.025461332	0.472161674	0.147698769	0.016522614	0.199073761
2. CVD Fall	1	Men	2010	88	0.776286002	0.028613017	0.002408499	0.075231126	0.053343067	0.003292784	0.060825506	0.756181849	0.062701261	0.070488274	0.032181068	0.078447548	0.634832055	0.138818735	0.067787676	0.158561534	0.033695057	0.662821636	0.129262476	0.016868118	0.157352713	0.060789139	0.647683513	0.064450436	0.227076911	0.050202104	0.533816425	0.098105934	0.317875537	0.068734394	0.560198369	0.030259035	0.340808202	0.107641186	0.043933628	0.013810645	0.225358446	0.398963825	0.015973994	0.194318275
2. CVD Fall	1	Men	2010	89	0.790987502	0.02938027	0.001638116	0.051173012	0.063582793	0.003197165	0.060041141	0.703373724	0.115142907	0.073141169	0.031016807	0.077325393	0.650041148	0.129924905	0.064748404	0.155285543	0.039315861	0.682658553	0.107587423	0.016321471	0.154116693	0.068096165	0.649125524	0.061612657	0.221165654	0.051892325	0.547744973	0.092996133	0.307366569	0.066340555	0.575539273	0.029178584	0.328941588	0.122278356	0.047470428	0.009646935	0.15924978	0.456137257	0.015459856	0.189757389
2. CVD Fall	1	Men	2010	90	0.691480266	0.031460566	0.003031033	0.084846385	0.076778299	0.005513945	0.106889506	0.64234291	0.089261904	0.077869773	0.053074467	0.137450946	0.47138526	0.144709886	0.109753922	0.274150932	0.049801623	0.543957648	0.106081249	0.028044335	0.272115146	0.065891004	0.441352907	0.104529821	0.388226269	0.051031631	0.257030286	0.156406191	0.535531892	0.070304494	0.307681877	0.049954796	0.572058832	0.129625176	0.038487668	0.024187131	0.361727644	0.085397836	0.026570327	0.334004219
2. CVD Fall	1	Men	2010	91	0.708275081	0.027053831	0.002240698	0.074247911	0.0770701	0.005369203	0.105743177	0.619401787	0.132474515	0.061114747	0.051251902	0.135757049	0.515154792	0.111070685	0.104945971	0.268828553	0.033303298	0.523033049	0.149602612	0.027200223	0.266860819	0.077597882	0.443938801	0.100041116	0.378422202	0.048763332	0.284854869	0.14835744	0.518024359	0.055330808	0.344091481	0.048265661	0.552312049	0.147540297	0.050302301	0.006715524	0.111063859	0.332107172	0.025777247	0.326493601
2. CVD Fall	1	Men	2010	92	0.658326886	0.033288172	0.00476482	0.12045057	0.073197944	0.005236729	0.104734878	0.598587074	0.143426383	0.074208609	0.04954638	0.134231554	0.513453058	0.122331584	0.100416957	0.263798401	0.049096298	0.523845847	0.138743851	0.026417241	0.261896762	0.06404084	0.471102089	0.09581321	0.369043861	0.049639816	0.308332464	0.140791808	0.501235912	0.05303216	0.366893551	0.04668632	0.533387969	0.128674167	0.061962996	0	0	0.464982347	0.025042111	0.31933838
2. CVD Fall	1	Men	2010	93	0.684402913	0.043394531	0.004654018	0.092206717	0.066357468	0.005116457	0.103867896	0.622542928	0.123437408	0.073186824	0.047955257	0.132877582	0.473506071	0.17127343	0.096158676	0.259061823	0.050052362	0.540842333	0.126186524	0.025694445	0.257224336	0.070555599	0.477513263	0.091838535	0.360092603	0.046021256	0.335116714	0.13369306	0.485168971	0.068128983	0.371368038	0.045214366	0.515288612	0.13317999	0.058670816	0.011210383	0.149210206	0.310824889	0.024364053	0.312539662
2. CVD Fall	1	Men	2010	94	0.640142354	0.054922527	0.006339574	0.097143228	0.093298328	0.005008351	0.103145637	0.554907466	0.188929646	0.077988582	0.046476003	0.131698303	0.541422596	0.111794525	0.092163008	0.254619871	0.070747181	0.505771861	0.145605355	0.025030986	0.252844617	0.060772317	0.499548856	0.088109617	0.35156921	0.037444932	0.365685822	0.127044894	0.469824352	0.05735881	0.400779729	0.04384751	0.498013952	0.121125498	0.056780047	0.00781589	0.113180732	0.371257392	0.023742304	0.306098137
2. CVD Fall	1	Men	2010	95	0.663813515	0.044354049	0.004786142	0.092611563	0.086950719	0.00491241	0.102571602	0.65000008	0.102346034	0.071850821	0.045106182	0.130696883	0.510069005	0.151035895	0.088421879	0.250473221	0.076560365	0.478930756	0.171324467	0.024426104	0.248758308	0.060490585	0.511416619	0.084619034	0.343473762	0.04680292	0.377165073	0.120830915	0.455201093	0.039927558	0.435927153	0.042583553	0.481561737	0.126361721	0.061980638	0.02303827	0.247939919	0.217489298	0.023176181	0.300013973
2. CVD Fall	1	Men	2010	96	0.60709185	0.044053626	0.007142675	0.132372768	0.102361065	0.004828663	0.102149353	0.537782493	0.207423444	0.081074185	0.043843433	0.129876445	0.479703249	0.188747449	0.084927218	0.246622084	0.072200259	0.488638065	0.170316904	0.023879122	0.244965649	0.060924956	0.521910139	0.081359382	0.335805523	0.026823143	0.416845938	0.115034619	0.4412963	0.057822122	0.434830145	0.041420376	0.465927357	0.112761788	0.05215883	0.041926769	0.403696891	0.072503923	0.022665084	0.294286716
2. CVD Fall	1	Men	2010	97	0.607292786	0.039294122	0.006279229	0.131503688	0.108990521	0.004757174	0.101882479	0.493446275	0.24803158	0.086596684	0.042685448	0.129240013	0.515704326	0.159558626	0.081670932	0.243066117	0.076040167	0.520561771	0.138542289	0.023389436	0.241466337	0.070863052	0.522250877	0.078323243	0.328562828	0.026676097	0.435579476	0.109639389	0.428105038	0.04975828	0.458782056	0.040355916	0.451103748	0.126341756	0.091527426	0.007337182	0.066877259	0.396792702	0.022208484	0.28891519
2. CVD Fall	1	Men	2010	98	0.518552158	0.041535414	0.010899931	0.196973803	0.125566098	0.004698041	0.101774555	0.45673623	0.300853647	0.071989712	0.041629955	0.128790457	0.571199376	0.11035141	0.078644876	0.239804338	0.071934249	0.520752273	0.146097543	0.022956505	0.23825943	0.066366302	0.536387554	0.075503157	0.321742987	0.049244372	0.43050688	0.104628498	0.415620249	0.041859251	0.48167126	0.039388149	0.437081339	0.134427551	0.061263519	0.033691275	0.321122562	0.143791764	0.021805921	0.283897408
2. CVD Fall	1	Men	2010	99	0.609762493	0.040825889	0.005542799	0.11399475	0.123393579	0.004651395	0.101829095	0.4730009	0.259757718	0.098036264	0.040674692	0.128530425	0.51041658	0.176907543	0.075840832	0.236835045	0.069270852	0.544207192	0.128598837	0.022579844	0.235343275	0.074338979	0.537427224	0.072891598	0.315342199	0.050409877	0.445772273	0.099985137	0.403832713	0.072049848	0.465587029	0.038515068	0.423848055	0.116943665	0.084947267	0.003445273	0.035531696	0.458444623	0.021456986	0.279230489
2. CVD Fall	1	Men	2010	100	0.412046925	0.045665598	0.020040377	0.284960451	0.130619746	0.004617402	0.102049501	0.481470707	0.248804112	0.101445508	0.039817389	0.128462285	0.519046751	0.173547013	0.073250495	0.234155741	0.097573995	0.470709995	0.176741571	0.02225901	0.232715429	0.06081095	0.559352602	0.070480959	0.309355489	0.038230262	0.473346254	0.095692434	0.392731051	0.059306589	0.491569395	0.037734661	0.411389356	0.117939883	0.08445613	0.010721208	0.101923339	0.388887536	0.02116132	0.274910584
2. CVD Fall	1	Men	2011	35	0.991249281	0.002510843	0	0	0.003113834	0.000165519	0.002960523	0.981446044	0	0.012863246	0.001796602	0.003894107	0.966961726	0.020003687	0.004381932	0.008652655	0	0.990536609	0	0.000889549	0.008573842	0.040154371	0.94219844	0.004105456	0.013541733	0	0.971057843	0.007326702	0.021615455	0	0.974297019	0.001676956	0.024026025	0.067008055	0.004563618	0	0	0.916492909	0.000839681	0.011095737
2. CVD Fall	1	Men	2011	36	0.991956822	0.002069445	0	0	0.002926807	0.000158644	0.002888282	0.970835385	0	0.02364401	0.001721642	0.003798963	0.96492735	0.022435001	0.004197801	0.008439848	0	0.990784476	0	0.000852527	0.008362996	0.060724474	0.922136016	0.003933073	0.013206436	0	0.971909316	0.007016348	0.021074336	0	0.974970391	0.001607012	0.023422597	0.080636751	0.00508608	0	0	0.902650504	0.00080474	0.010821925
2. CVD Fall	1	Men	2011	37	0.990591629	0.003254921	0	0	0.003183582	0.000152055	0.002817813	0.974620392	0	0.020023671	0.001649792	0.003706145	0.983248792	0.004497761	0.004021271	0.008232175	0	0.991025718	0	0.000817044	0.008157238	0.094389678	0.888963393	0.003767811	0.012879118	0	0.972735448	0.006718743	0.020545809	0	0.97562691	0.001539969	0.022833121	0.072223124	0.003898883	0	0	0.912552071	0.00077125	0.010554672
2. CVD Fall	1	Men	2011	38	0.990721268	0.003245192	0	0	0.003138726	0.000145741	0.002749073	0.968463269	0	0.026340212	0.001580922	0.003615597	0.952804578	0.035313887	0.003852027	0.008029509	0	0.991260523	0	0.000783035	0.007956442	0.09135525	0.892475803	0.003609372	0.012559576	0	0.973537103	0.006433354	0.020029544	0	0.976267068	0.001475708	0.022257224	0.07896948	0.006490166	0	0	0.903507385	0.000739152	0.010293816
2. CVD Fall	1	Men	2011	39	0.989911281	0.003094726	0	0	0.004172284	0.000139689	0.00268202	0.981686411	0	0.013271415	0.001514908	0.003527267	0.965840936	0.022637573	0.003689764	0.007831727	0	0.991489075	0	0.000750439	0.007760486	0.079816579	0.904478335	0.003457472	0.012247614	0	0.974315113	0.006159671	0.019525216	0	0.976891343	0.001414112	0.021694545	0.06159259	0.007002844	0	0	0.920656981	0.000708389	0.010039196
2. CVD Fall	1	Men	2011	40	0.990677724	0.00264628	0	0	0.002755016	0.000251572	0.003669407	0.976596207	0	0.015850613	0.00272756	0.00482562	0.965175291	0.017471967	0.006640613	0.010712129	0	0.988033929	0	0.001351345	0.010614726	0.077374033	0.899654846	0.006222821	0.0167483	0	0.962229166	0.011080629	0.026690205	0	0.967801598	0.002546128	0.029652274	0.076017466	0.007956143	0	0	0.901020848	0.001275634	0.01372991
2. CVD Fall	1	Men	2011	41	0.987756889	0.003043559	0	0	0.00537848	0.000241128	0.003579944	0.979486739	0	0.013191919	0.002613597	0.004707746	0.967926134	0.015265552	0.006360347	0.010447967	0	0.988351909	0	0.001295084	0.010353007	0.095910557	0.881797697	0.005960469	0.016331277	0	0.96337721	0.010607667	0.026015122	0	0.968661412	0.002439795	0.028898793	0.080338773	0.00477187	0	0	0.900277135	0.001222535	0.013389686
2. CVD Fall	1	Men	2011	42	0.988531465	0.003423832	0	0	0.004320899	0.000231119	0.003492685	0.974648331	0	0.018254546	0.002504358	0.004592765	0.944588203	0.039130007	0.006091629	0.010190161	0	0.988661252	0	0.001241161	0.010097587	0.065269534	0.913097438	0.005708933	0.015924095	0	0.964490459	0.010154061	0.02535548	0	0.969499738	0.002337873	0.028162389	0.070878336	0.006810355	0	0	0.908082097	0.001171643	0.013057569
2. CVD Fall	1	Men	2011	43	0.987781486	0.003068275	0	0	0.005521134	0.000221527	0.003407577	0.975137954	0	0.017981789	0.00239965	0.004480607	0.95741786	0.026809608	0.005833976	0.009938556	0	0.988962207	0	0.00118948	0.009848313	0.09816903	0.880836704	0.005467762	0.015526503	0	0.965570132	0.009719004	0.024710864	0	0.970317223	0.002240178	0.027442599	0.089442116	0.005732295	0	0	0.890969364	0.001122868	0.012733356
2. CVD Fall	1	Men	2011	44	0.987498935	0.003321699	0	0	0.005642459	0.000212335	0.003324572	0.958718787	0	0.034610721	0.002299284	0.004371208	0.975093104	0.009626967	0.005586929	0.009693	0	0.989255018	0	0.001139948	0.009605034	0.077160349	0.902464866	0.005236527	0.015138258	0	0.966617408	0.009301722	0.02408087	0	0.971114494	0.002146536	0.02673897	0.078773884	0.007013207	0	0	0.900719938	0.001076121	0.01241685
2. CVD Fall	1	Men	2011	45	0.985335059	0.003777847	0	0	0.00597864	0.000359203	0.004549253	0.96705479	0	0.023075936	0.003888213	0.005981062	0.971271481	0.006027691	0.009442294	0.013258534	0	0.98493361	0	0.00192811	0.01313828	0.060398332	0.910051022	0.008850639	0.020700007	0	0.951379447	0.015710206	0.032910347	0	0.959832787	0.003630006	0.036537208	0.066748909	0.008177945	0	0	0.906271423	0.001820174	0.01698155
2. CVD Fall	1	Men	2011	46	0.98411357	0.004033961	0	0	0.007069635	0.000344304	0.00443853	0.969957005	0	0.020482438	0.003725462	0.005835094	0.943622745	0.034405353	0.009041414	0.012930489	0	0.985338905	0	0.001847812	0.012813283	0.064604032	0.906739817	0.008475443	0.020180709	0	0.95290124	0.015032622	0.032066138	0	0.960927999	0.003478164	0.035593837	0.064530304	0.007135081	0	0	0.910031763	0.001744392	0.016558461
2. CVD Fall	1	Men	2011	47	0.98547383	0.003762348	0	0	0.006103237	0.000330027	0.004330558	0.973415164	0	0.017322642	0.003569462	0.005692732	0.963545425	0.015187239	0.008657013	0.012610322	0	0.985733049	0	0.001770855	0.012496096	0.073689086	0.898521687	0.008115683	0.019673544	0	0.954376531	0.01438265	0.031240819	0	0.961996062	0.003332623	0.034671315	0.077798879	0.00918089	0	0	0.895203074	0.001671764	0.016145393
2. CVD Fall	1	Men	2011	48	0.984945692	0.003861124	0	0	0.006651564	0.000316347	0.004225273	0.965026709	0	0.025999468	0.003419932	0.005553892	0.951621028	0.027792721	0.008288407	0.012297845	0	0.986116369	0	0.001697102	0.012186529	0.077686944	0.895364133	0.007770719	0.019178205	0	0.955806982	0.013759143	0.030433875	0	0.963037814	0.003193121	0.033769065	0.081800353	0.009099091	0	0	0.891756298	0.001602161	0.015742097
2. CVD Fall	1	Men	2011	49	0.983884477	0.004572049	0	0	0.007117621	0.000303237	0.004122616	0.966504342	0	0.024800559	0.003276604	0.005418494	0.947180801	0.03289139	0.007934939	0.01199287	0	0.98648918	0	0.00162642	0.011884399	0.064940978	0.908924697	0.007439936	0.018694389	0	0.957194194	0.013161	0.029644807	0	0.964054064	0.003059409	0.032886528	0.08448648	0.007869899	0	0	0.890759833	0.001535456	0.015348332
2. CVD Fall	1	Men	2011	50	0.971791899	0.004849447	4.40E-05	0.008945286	0.00783585	0.000491032	0.006042498	0.945132098	0.022460899	0.019162859	0.005303008	0.007941135	0.935716001	0.033884163	0.012831695	0.01756814	0.006004575	0.959806648	0.014146358	0.002633043	0.017409376	0.067011028	0.893584553	0.012032274	0.027372145	0.074899961	0.860464679	0.021263179	0.043372181	0.076981159	0.86996312	0.004951679	0.048104041	0.076301482	0.008647859	0.000179599	0.020165932	0.869741129	0.002485819	0.02247818
2. CVD Fall	1	Men	2011	51	0.975547088	0.005531665	2.50E-05	0.00447535	0.008054266	0.0004707	0.005895924	0.957839365	0.005727123	0.023605204	0.005080564	0.007747744	0.966255868	0.004329777	0.012282599	0.017131756	0.007172814	0.962000366	0.011326359	0.002523386	0.016977075	0.074482182	0.887320663	0.011518466	0.02667869	0.03464342	0.902784994	0.020333187	0.042238399	0.120260775	0.828159952	0.004744168	0.046835105	0.077642058	0.008720898	6.86E-06	0.000778709	0.888554883	0.002382334	0.021914261
2. CVD Fall	1	Men	2011	52	0.979929122	0.004895229	4.98E-06	0.001011397	0.007955008	0.00045122	0.005753043	0.948347789	0.014018853	0.02520682	0.004867353	0.007559186	0.939611938	0.031926181	0.011756026	0.016705855	0.006122937	0.964421173	0.010482422	0.002418302	0.016555166	0.06051893	0.902454047	0.011025758	0.026001265	0.076278936	0.863150798	0.019440933	0.041129333	0.095224008	0.854637335	0.004545275	0.045593382	0.084015622	0.010916984	7.65E-05	0.006882186	0.874461914	0.002283167	0.021363628
2. CVD Fall	1	Men	2011	53	0.975420543	0.005983764	1.93E-05	0.003188698	0.009341404	0.000432557	0.005613777	0.956177158	0.006987733	0.024796757	0.004662996	0.007375356	0.952770488	0.019688277	0.011251045	0.01629019	0.007143499	0.964684824	0.009710668	0.002317604	0.016143405	0.082090888	0.882016368	0.010553278	0.025339466	0.066870504	0.874500328	0.018584858	0.04004431	0.084208572	0.86705866	0.004354647	0.044378122	0.085350369	0.012008176	0.000162639	0.013200373	0.86626435	0.002188139	0.020825955
2. CVD Fall	1	Men	2011	54	0.975996244	0.006242519	1.50E-05	0.002385083	0.009468411	0.000414676	0.005478049	0.963937267	0.00171401	0.022685441	0.004467128	0.007196154	0.94216054	0.031188174	0.010766764	0.015884523	0.008951277	0.958978079	0.014107981	0.002221111	0.015741553	0.085810581	0.879396328	0.01010019	0.024692902	0.061302697	0.881951152	0.017763473	0.038982678	0.076193998	0.876445466	0.004171942	0.043188593	0.080562549	0.011070202	0	0	0.885969239	0.002097081	0.020300929
2. CVD Fall	1	Men	2011	55	0.965743625	0.00645813	5.53E-05	0.008438182	0.010038185	0.000647007	0.008619548	0.952160265	0.001454977	0.028098592	0.006964723	0.011321443	0.916034185	0.042224911	0.016767041	0.024973864	0.008368522	0.950991491	0.01242625	0.003464381	0.024749357	0.07607517	0.869397625	0.01573092	0.038796285	0.067861084	0.843330912	0.027627383	0.061180621	0.083617192	0.842118279	0.006504852	0.067759677	0.089982959	0.012955555	0	0	0.861883905	0.003271001	0.031906581
2. CVD Fall	1	Men	2011	56	0.965247144	0.006704122	4.90E-05	0.007201078	0.011766633	0.000620302	0.008411761	0.955188074	0.004001641	0.02309143	0.006671901	0.011046954	0.917115831	0.042491128	0.016042145	0.024350897	0.009148873	0.949137342	0.01426131	0.003320201	0.024132274	0.07343876	0.873707367	0.015052795	0.037801077	0.109257196	0.804804915	0.026396634	0.059541255	0.084602527	0.843244459	0.006231728	0.065921286	0.08866456	0.012025405	0.000457736	0.036210565	0.828407435	0.003134945	0.031099354
2. CVD Fall	1	Men	2011	57	0.96175304	0.00646973	7.25E-05	0.011013022	0.011887621	0.000594722	0.00820934	0.948557772	0.01135802	0.02291347	0.006391265	0.010779472	0.92288613	0.038023954	0.015346949	0.023742967	0.0077031	0.946372714	0.019212025	0.00318206	0.023530101	0.05769838	0.891070468	0.014402494	0.036828657	0.072387231	0.844460433	0.025215684	0.057936652	0.07822986	0.851679071	0.00596998	0.064121089	0.074915373	0.013451524	0.000368824	0.026318211	0.851630382	0.003004591	0.030311095
2. CVD Fall	1	Men	2011	58	0.961167159	0.006825234	7.14E-05	0.010285198	0.013068581	0.000570221	0.008012181	0.930124373	0.025886604	0.027347847	0.006122317	0.010518858	0.899153545	0.063016479	0.014680236	0.02314974	0.011302523	0.944401967	0.018303292	0.003049714	0.022942504	0.067510983	0.882831667	0.013778878	0.035878472	0.064807978	0.854743615	0.024082509	0.056365898	0.099134665	0.83278812	0.005719144	0.062358071	0.093217965	0.014981208	7.05E-06	0.000463104	0.85890961	0.002879708	0.029541359
2. CVD Fall	1	Men	2011	59	0.961304466	0.007321401	7.00E-05	0.009402939	0.013534233	0.000546757	0.007820186	0.936001478	0.018336031	0.029532929	0.005864582	0.010264979	0.927980961	0.035407303	0.014040843	0.022570892	0.010459656	0.948791429	0.015456823	0.002922927	0.022369165	0.065073151	0.886796006	0.013180855	0.034949988	0.045577379	0.876599331	0.022995176	0.054828114	0.075884585	0.858005385	0.005478775	0.060631255	0.085994121	0.012921501	5.03E-05	0.003827194	0.865657093	0.002760072	0.02878972
2. CVD Fall	1	Men	2011	60	0.964553788	0.007205793	2.08E-05	0.002854447	0.012548216	0.000811325	0.012005652	0.92658039	0.020363027	0.028607492	0.008693158	0.015755933	0.894373225	0.050236284	0.020779098	0.034611394	0.007812502	0.933097896	0.020451771	0.004335239	0.034302592	0.076605461	0.850342184	0.019509735	0.05354262	0.052715031	0.829448842	0.033970135	0.083865991	0.08668201	0.812495242	0.008121894	0.092700854	0.095544039	0.013591442	0.000263155	0.018730916	0.823650283	0.004093828	0.044126337
2. CVD Fall	1	Men	2011	61	0.955896093	0.007773	7.02E-05	0.008884865	0.014878289	0.00077803	0.011719486	0.943419571	0.002932216	0.029944048	0.008326936	0.015377229	0.908939623	0.037446494	0.019869115	0.033744768	0.010196748	0.931526779	0.020676996	0.004155216	0.033444261	0.064020549	0.865172534	0.01865875	0.052148167	0.060817321	0.82521458	0.032420944	0.081547156	0.094669331	0.807455821	0.007780379	0.09009447	0.085277626	0.013563461	0	0	0.854235779	0.003923966	0.042999167
2. CVD Fall	1	Men	2011	62	0.956436823	0.007488722	5.89E-05	0.007749148	0.016079201	0.000746153	0.011441021	0.936693498	0.008996936	0.031324973	0.007976044	0.015008549	0.885230362	0.062873809	0.018996472	0.032899356	0.010841432	0.928434742	0.02413406	0.003982798	0.032606968	0.07430441	0.857067324	0.017842743	0.050785523	0.044478914	0.845310183	0.030934512	0.079276391	0.094383706	0.810622263	0.007453175	0.087540856	0.088790747	0.017014081	0.000282397	0.016044427	0.832208463	0.003761284	0.041898601
2. CVD Fall	1	Men	2011	63	0.952086367	0.008756455	8.83E-05	0.009894998	0.017288108	0.000715637	0.011170133	0.930478238	0.013758924	0.033473247	0.007639865	0.014649725	0.906992209	0.042773388	0.018159669	0.032074734	0.011073445	0.927188032	0.026130553	0.00381768	0.03179029	0.068520482	0.864965233	0.017060308	0.049453977	0.042567388	0.850871687	0.029508362	0.077052563	0.077265333	0.830556184	0.007139708	0.085038775	0.088004627	0.016796552	0.000297499	0.017106132	0.833365624	0.003605495	0.040824071
2. CVD Fall	1	Men	2011	64	0.954195469	0.008742921	8.00E-05	0.008987327	0.016401147	0.00068643	0.010906706	0.919599471	0.019909681	0.038872438	0.007317811	0.014300598	0.897897784	0.05347445	0.017357271	0.031270495	0.011648644	0.931944934	0.02175302	0.003659574	0.030993827	0.068741393	0.86679565	0.016310101	0.048152855	0.085564864	0.811420397	0.028140135	0.074874605	0.093854389	0.816719115	0.006839429	0.082587067	0.100037721	0.017480185	0.000284494	0.015730099	0.82323614	0.003456324	0.039775037
2. CVD Fall	1	Men	2011	65	0.946750675	0.00901598	8.58E-05	0.009344524	0.017071523	0.001048623	0.016682842	0.917801925	0.013907112	0.035260556	0.011162268	0.021868139	0.858761149	0.067069986	0.026416071	0.047752794	0.01128488	0.912770512	0.023026482	0.005586774	0.047331352	0.070129421	0.831608477	0.024828245	0.073433857	0.067465214	0.77587193	0.042722641	0.113940215	0.08367636	0.780291008	0.010433693	0.125598939	0.093642148	0.017288795	0.000473537	0.026186088	0.796434274	0.005276731	0.060698427
2. CVD Fall	1	Men	2011	66	0.94297312	0.009177179	9.85E-05	0.010525825	0.019926195	0.001006036	0.016293096	0.916840875	0.0156487	0.035467706	0.010691744	0.021350974	0.862022125	0.066181319	0.02524141	0.046555146	0.01264627	0.90382093	0.032031409	0.005356016	0.046145374	0.078080879	0.826700786	0.023730159	0.071488175	0.065420662	0.783193817	0.040717679	0.110667842	0.079282127	0.788811285	0.009995038	0.121911551	0.099190003	0.01738012	0	0	0.819238091	0.005059029	0.059132757
2. CVD Fall	1	Men	2011	67	0.940662206	0.010410699	0.000122811	0.011536238	0.020388177	0.000965298	0.01591457	0.920434357	0.011903182	0.036572959	0.01024115	0.020848352	0.878840121	0.051656851	0.024115303	0.045387725	0.012981002	0.904557988	0.032336471	0.005135159	0.044989379	0.065107949	0.842627197	0.022677547	0.069587307	0.053048239	0.800694054	0.038794739	0.107462968	0.086469979	0.785656602	0.009574991	0.118298428	0.093854444	0.017420838	0.000387867	0.021391762	0.804489669	0.004850674	0.057604746
2. CVD Fall	1	Men	2011	68	0.938448756	0.010408429	0.000130606	0.012262012	0.022276721	0.000926339	0.015547136	0.906149817	0.023026497	0.040653887	0.009809707	0.020360092	0.868814904	0.063899199	0.023035862	0.044250035	0.01453678	0.903215736	0.033460792	0.004923819	0.043862874	0.067539518	0.843061426	0.021668636	0.067730421	0.064309814	0.794415062	0.036950746	0.104324378	0.081463732	0.794605133	0.009172826	0.114758308	0.093825743	0.017711849	0.000331754	0.018054465	0.80931116	0.004651305	0.056113724
2. CVD Fall	1	Men	2011	69	0.939206968	0.009821701	0.000135518	0.013474512	0.021281529	0.000889091	0.015190681	0.908979674	0.017568619	0.044169003	0.009396674	0.019886031	0.86572968	0.069127419	0.02200129	0.043141611	0.014525363	0.900039981	0.037947626	0.004721629	0.042765401	0.079321016	0.834060503	0.020701738	0.065916742	0.061737763	0.801828479	0.035182778	0.10125098	0.054378197	0.825543875	0.008787852	0.111290076	0.105819145	0.020245105	0	0	0.814816106	0.004460577	0.054659067
2. CVD Fall	1	Men	2011	70	0.924069363	0.010770767	0.000165449	0.014963067	0.024070652	0.001493358	0.024467346	0.889985179	0.018979327	0.043268258	0.015749726	0.03201751	0.817719059	0.076194154	0.036761156	0.06932563	0.016768904	0.867042753	0.039541998	0.007923105	0.06872324	0.069114063	0.79056184	0.034600918	0.105723179	0.038183389	0.741302464	0.058594342	0.161919804	0.084444811	0.722997391	0.01473151	0.177826287	0.096731028	0.019520231	0.000374993	0.01847342	0.769665567	0.007485533	0.087749228
2. CVD Fall	1	Men	2011	71	0.919276474	0.011279454	0.000207256	0.017835852	0.026051556	0.00143384	0.023915567	0.89057433	0.023875707	0.039179859	0.015087808	0.031282295	0.835995908	0.06131178	0.035099131	0.067593181	0.011606491	0.876093257	0.037692604	0.00759956	0.067008089	0.068416113	0.795663109	0.033047854	0.102872925	0.047543495	0.739639218	0.055752644	0.157064643	0.071093934	0.7424489	0.014114667	0.1723425	0.091838396	0.021064624	0	0	0.794447822	0.007180355	0.085468803
2. CVD Fall	1	Men	2011	72	0.920128123	0.012015172	0.000213104	0.017214051	0.025671086	0.001376997	0.023381468	0.887979074	0.023723532	0.043272967	0.014454565	0.030569862	0.841196323	0.059389577	0.033507058	0.065907042	0.016404598	0.869253234	0.041712996	0.007290286	0.065338885	0.0651247	0.803224363	0.03156027	0.100090667	0.062422423	0.732234632	0.05303014	0.152312805	0.067503389	0.751998796	0.013524602	0.166973213	0.108793129	0.023020442	0	0	0.77805207	0.006888655	0.083245704
2. CVD Fall	1	Men	2011	73	0.911241911	0.012375131	0.000298833	0.023279657	0.028616774	0.00132273	0.022864963	0.880417294	0.033569814	0.042283894	0.01384893	0.029880067	0.823177682	0.080573259	0.031982363	0.064266696	0.015527877	0.869621172	0.044141074	0.006994762	0.063715115	0.071378192	0.801110523	0.030135745	0.09737554	0.055079124	0.746834837	0.05042269	0.147663348	0.076059375	0.749262684	0.01296032	0.16171762	0.098896602	0.0244504	0.000651251	0.025293307	0.763019281	0.006609938	0.08107922
2. CVD Fall	1	Men	2011	74	0.914906151	0.013088686	0.000236238	0.017492811	0.030639171	0.00127095	0.022365992	0.879144258	0.033183975	0.045189076	0.01326989	0.029212801	0.846687561	0.060118156	0.030522599	0.062671684	0.020562272	0.871938388	0.038650523	0.006712489	0.062136328	0.074732975	0.801768258	0.028771982	0.094726786	0.059094016	0.74986406	0.047926369	0.143115555	0.074783921	0.756220025	0.012420877	0.156575177	0.100149442	0.022224001	0.001894499	0.076655115	0.713764485	0.006343736	0.078968722
2. CVD Fall	1	Men	2011	75	0.888079143	0.013113409	0.000354774	0.025986837	0.034130325	0.002141283	0.036194229	0.867232248	0.020213778	0.043015494	0.022290648	0.047247832	0.764852062	0.083006703	0.05105383	0.101087406	0.020448132	0.814921937	0.053107782	0.011293892	0.100228257	0.065210759	0.73424875	0.048146399	0.152394092	0.03781524	0.653021568	0.079822353	0.229340839	0.072001092	0.656492819	0.020868865	0.250637224	0.107110136	0.02496982	0.000438319	0.0168128	0.712789033	0.010674433	0.127205458
2. CVD Fall	1	Men	2011	76	0.893083283	0.015363282	0.00032927	0.020653292	0.033085201	0.00205879	0.035426882	0.843747067	0.039785855	0.048884715	0.021363907	0.046218457	0.784247521	0.06844427	0.048710647	0.098597562	0.020251889	0.820120823	0.05102006	0.010843119	0.097764109	0.062292596	0.743519934	0.045957601	0.148229869	0.05168485	0.650344697	0.075816925	0.222153528	0.080502945	0.65698579	0.020005713	0.242505552	0.102909089	0.028928863	8.71E-05	0.002916111	0.731011833	0.010249386	0.123897575
2. CVD Fall	1	Men	2011	77	0.881326827	0.015114497	0.000446964	0.028275511	0.038167452	0.001980228	0.034688521	0.839625999	0.045801524	0.048867367	0.020478973	0.045226136	0.780762714	0.076586552	0.046469684	0.096181051	0.015220582	0.823682303	0.055311152	0.010413225	0.095372737	0.076006516	0.735956368	0.043864409	0.144172708	0.059908027	0.6529713	0.071987717	0.215132957	0.074995386	0.671262144	0.019181616	0.234560854	0.1004845	0.028047149	0	0	0.740944309	0.009844061	0.120679982
2. CVD Fall	1	Men	2011	78	0.887655752	0.014780907	0.000393979	0.025568558	0.035716094	0.00190547	0.033979239	0.859867551	0.025687838	0.050539281	0.019634409	0.04427092	0.783990625	0.077844382	0.044327463	0.09383753	0.02181724	0.810453763	0.064671681	0.010003511	0.093053805	0.066846439	0.751067951	0.041863555	0.140222054	0.062731836	0.660659657	0.068329153	0.208279354	0.073479692	0.681321198	0.018395233	0.226803877	0.113912735	0.031982598	0	0	0.727094692	0.009457798	0.117552177
2. CVD Fall	1	Men	2011	79	0.87697567	0.016106701	0.000523043	0.030929213	0.040331793	0.001834399	0.033299181	0.841949848	0.045413875	0.050454508	0.018828853	0.043352917	0.774593656	0.091558896	0.042280688	0.09156676	0.022180155	0.823157416	0.054242033	0.009613318	0.090807078	0.075666332	0.748004202	0.039951942	0.136377524	0.063066834	0.670503958	0.064835935	0.201593272	0.048242027	0.714876943	0.017645294	0.219235735	0.107333126	0.028314759	0.002376057	0.075043087	0.6633292	0.009089977	0.114513794
2. CVD Fall	1	Men	2011	80	0.84597247	0.018822744	0.000748118	0.037477992	0.036847104	0.00324645	0.056885123	0.799325075	0.046820297	0.046668398	0.03318471	0.07400152	0.680868495	0.089326225	0.074094081	0.155711199	0.022874167	0.754656592	0.051059733	0.016980991	0.154428516	0.075341314	0.623502972	0.070052601	0.231103112	0.046391503	0.500715376	0.113003599	0.339889522	0.063631099	0.536131036	0.031107725	0.36913014	0.112015386	0.037037233	0	0	0.64050443	0.016058611	0.19438434
2. CVD Fall	1	Men	2011	81	0.841820295	0.020216427	0.000804988	0.037488709	0.040737584	0.003128817	0.05580318	0.785007325	0.05282626	0.057792721	0.031840983	0.07253271	0.68376848	0.093556649	0.070667203	0.152007667	0.02960663	0.73321556	0.070080366	0.016332446	0.150764998	0.080172	0.628202197	0.066852276	0.224773526	0.047395271	0.516610494	0.10716548	0.328828755	0.060936075	0.55259676	0.029857251	0.356609913	0.10516946	0.029428627	0.000849717	0.027213805	0.632490011	0.015447401	0.189400979
2. CVD Fall	1	Men	2011	82	0.828805303	0.017990067	0.000843264	0.043931825	0.050638689	0.00301739	0.054773461	0.804445007	0.038481633	0.055381195	0.030562217	0.071129948	0.695401941	0.088768092	0.067399322	0.148430644	0.02418015	0.737440903	0.075435337	0.015716553	0.147227058	0.070521739	0.647049238	0.063800534	0.218628489	0.043138985	0.53719073	0.101604565	0.31806572	0.055814293	0.571090479	0.028667495	0.344427734	0.114635557	0.038181643	0.001662314	0.0400583	0.606022348	0.014867049	0.184572787
2. CVD Fall	1	Men	2011	83	0.841761302	0.020646314	0.000737967	0.03377181	0.046374009	0.002912008	0.053796591	0.77428049	0.064198602	0.062380638	0.029346423	0.069793847	0.678117702	0.112616421	0.064285519	0.144980357	0.02845165	0.733936551	0.078664499	0.015132372	0.143814929	0.074068978	0.652369888	0.060892757	0.212668376	0.052507318	0.543576797	0.096312717	0.307603167	0.066769666	0.5731063	0.027536606	0.332587428	0.120488283	0.030610405	0.005389828	0.144326653	0.504968213	0.014316672	0.179899947
2. CVD Fall	1	Men	2011	84	0.839412641	0.0238427	0.000612946	0.024450619	0.055995284	0.002812523	0.052873288	0.781331548	0.06457709	0.057374504	0.028191727	0.06852513	0.689549452	0.107472267	0.061321111	0.14165717	0.027807655	0.719407743	0.097676596	0.014579027	0.140528979	0.077798364	0.657183309	0.058124552	0.206893774	0.046874257	0.564399521	0.091282097	0.297444125	0.061594706	0.590849377	0.026462843	0.321093074	0.108900862	0.033463155	0.00419079	0.107106702	0.557160239	0.013795446	0.175382806
2. CVD Fall	1	Men	2011	85	0.831593721	0.025811095	0.000616585	0.022714453	0.052770351	0.003432595	0.0630612	0.767189257	0.073954757	0.043006985	0.03421026	0.081638741	0.654408409	0.103830535	0.073860689	0.167900367	0.027395755	0.699816232	0.088465765	0.017745898	0.16657635	0.080453091	0.605380634	0.070060576	0.244105699	0.045118937	0.496927116	0.109216233	0.348737714	0.077787153	0.51423984	0.032124805	0.375848202	0.121497121	0.035773567	0.007484768	0.165540099	0.445525947	0.016795083	0.207383414
2. CVD Fall	1	Men	2011	86	0.757667297	0.028753269	0.002906081	0.088886107	0.056391268	0.003321387	0.062074591	0.723474121	0.102922018	0.060436917	0.032900129	0.080266814	0.644913787	0.120426873	0.070478567	0.164180772	0.039347273	0.68189842	0.098732486	0.017122131	0.162899689	0.096424255	0.599117114	0.066902429	0.237556202	0.036861115	0.522476201	0.103496024	0.33716666	0.068234144	0.538094163	0.030907306	0.362764388	0.109044052	0.05048728	0.00403725	0.070007402	0.547930783	0.0162078	0.202285433
2. CVD Fall	1	Men	2011	87	0.765825119	0.022556537	0.00210919	0.083401772	0.061733963	0.003217164	0.061156255	0.744850797	0.086254755	0.058253663	0.031660832	0.078979952	0.658182435	0.113931267	0.067268865	0.160617433	0.021657168	0.697437007	0.104993213	0.016534433	0.159378179	0.078921183	0.625938555	0.063905344	0.231234919	0.034910442	0.54103628	0.098077644	0.325975634	0.052473616	0.567654915	0.029756092	0.350115376	0.113377276	0.022440092	0.02106424	0.463122944	0.166962333	0.015654637	0.197378477
2. CVD Fall	1	Men	2011	88	0.782110022	0.025576227	0.00209	0.073453355	0.053343067	0.003119806	0.060307524	0.760233389	0.061008327	0.070488274	0.030490511	0.077779499	0.63974341	0.138818735	0.064226609	0.157211246	0.030050598	0.668692217	0.129262476	0.015981991	0.156012719	0.060789139	0.653003021	0.061064684	0.225143156	0.050202104	0.541677174	0.092952169	0.315168553	0.068734394	0.564690232	0.028669447	0.337905926	0.107641186	0.039514319	0.011984329	0.220727197	0.412334643	0.015134838	0.192663487
2. CVD Fall	1	Men	2011	89	0.799075848	0.023397082	0.001267389	0.050117838	0.063582793	0.00302921	0.059529839	0.70877047	0.112034048	0.073141169	0.029387412	0.076666901	0.654764943	0.129924905	0.061346999	0.153963153	0.031262262	0.692881999	0.107587423	0.01546406	0.152804256	0.068096165	0.654245617	0.05837598	0.219282238	0.051892325	0.555247797	0.088110799	0.304749078	0.066340555	0.579873323	0.027645756	0.326140367	0.122278356	0.037953531	0.007463711	0.156872793	0.472642459	0.014647708	0.188141441
2. CVD Fall	1	Men	2011	90	0.693546898	0.027780615	0.00259747	0.082907258	0.076778299	0.005412876	0.110976584	0.64047018	0.086851832	0.077869773	0.052101628	0.142706586	0.46291445	0.144709886	0.107742166	0.284633498	0.043862215	0.540006375	0.106081249	0.027530291	0.28251987	0.065891004	0.428424501	0.102613821	0.403070674	0.051031631	0.239420311	0.153539314	0.556008745	0.070304494	0.286724019	0.04903914	0.593932346	0.129625176	0.034472747	0.020727373	0.354767703	0.087548337	0.026083301	0.346775363
2. CVD Fall	1	Men	2011	91	0.703962264	0.029487009	0.00237098	0.072052436	0.0770701	0.005270787	0.109786424	0.618727159	0.128897703	0.061114747	0.05031247	0.140947921	0.506799363	0.111070685	0.103022343	0.279107609	0.036217552	0.510413549	0.149602612	0.026701651	0.277064636	0.077597882	0.431302992	0.098207393	0.392891734	0.048763332	0.267766789	0.145638094	0.537831785	0.055330808	0.323857709	0.047380966	0.573430516	0.147540297	0.054901263	0.00710599	0.107493349	0.318676777	0.025304758	0.338977566
2. CVD Fall	1	Men	2011	92	0.663900692	0.027186477	0.003771787	0.118062788	0.073197944	0.005140742	0.108739571	0.598235215	0.139553871	0.074208609	0.04863821	0.139364095	0.505206949	0.122331584	0.098576345	0.273885123	0.039942618	0.523469738	0.138743851	0.025933021	0.271910771	0.06404084	0.458747379	0.094056983	0.383154798	0.049639816	0.291747639	0.138211138	0.520401407	0.05303216	0.347354421	0.045830574	0.553782846	0.128674167	0.050410405	0	0	0.464783577	0.024583096	0.331548754
2. CVD Fall	1	Men	2011	93	0.688912172	0.037622752	0.00391472	0.090330776	0.066357468	0.005022674	0.107839438	0.621673973	0.120104598	0.073186824	0.047076252	0.137958353	0.465363019	0.17127343	0.094396117	0.268967434	0.043269747	0.538260566	0.126186524	0.025223474	0.267059688	0.070555599	0.465427962	0.090155163	0.373861276	0.046021256	0.319016115	0.131242507	0.503720123	0.068128983	0.352493983	0.044385601	0.534991433	0.13317999	0.050981976	0.009429596	0.146659638	0.311341256	0.023917467	0.324490078
2. CVD Fall	1	Men	2011	94	0.648110826	0.045895967	0.005138608	0.095550158	0.093298328	0.00491655	0.107089563	0.555824778	0.183828546	0.077988582	0.045624112	0.136733982	0.533376149	0.111794525	0.090473689	0.264355638	0.058936149	0.508373816	0.145605355	0.024572176	0.262512504	0.060772317	0.487721111	0.086494595	0.365011978	0.037444932	0.350050089	0.1247162	0.48778878	0.05735881	0.382541142	0.043043798	0.51705625	0.121125498	0.047476585	0.006335252	0.111394461	0.372558838	0.023307114	0.317802252
2. CVD Fall	1	Men	2011	95	0.668974087	0.037991282	0.003977275	0.090790692	0.086950719	0.004822367	0.106493579	0.648592817	0.099582691	0.071850821	0.0442794	0.135694271	0.502112537	0.151035895	0.086801133	0.260050435	0.065386966	0.481040237	0.171324467	0.023978381	0.258269949	0.060490585	0.499834434	0.083067993	0.356606988	0.04680292	0.36197458	0.118616121	0.472606379	0.039927558	0.418294472	0.041803009	0.499974961	0.126361721	0.053466291	0.019144758	0.244517019	0.222273392	0.022751369	0.311485451
2. CVD Fall	1	Men	2011	96	0.611064482	0.040030588	0.00628763	0.129460896	0.102361065	0.004740155	0.106055184	0.539220545	0.201823011	0.081074185	0.043039796	0.134842463	0.47182998	0.188747449	0.083370528	0.256052044	0.065320877	0.48658852	0.170316904	0.023441425	0.254332273	0.060924956	0.510561411	0.079868089	0.348645543	0.026823143	0.402080872	0.11292607	0.458169915	0.057822122	0.417773947	0.040661153	0.483742778	0.112761788	0.048213196	0.036907743	0.396684077	0.077644352	0.02224964	0.305539204
2. CVD Fall	1	Men	2011	97	0.607210594	0.039288023	0.006082498	0.12798028	0.108990521	0.004669977	0.105778106	0.495983856	0.241334728	0.086596684	0.041903037	0.134181696	0.507907337	0.159558626	0.080173928	0.252360109	0.075701741	0.512096096	0.138542289	0.022960715	0.250699159	0.070863052	0.511123433	0.076887602	0.341125913	0.026676097	0.421219904	0.107629732	0.444474266	0.04975828	0.442273149	0.039616205	0.468352366	0.126341756	0.091317294	0.007107304	0.065103346	0.3883666	0.02180141	0.299962289
2. CVD Fall	1	Men	2011	98	0.525714845	0.036179931	0.00917317	0.193087974	0.125566098	0.004611927	0.105666055	0.460697849	0.292730599	0.071989712	0.040866891	0.13371495	0.563471639	0.11035141	0.077203339	0.248973611	0.062218361	0.521778745	0.146097543	0.022535719	0.247369631	0.066366302	0.525469185	0.074119207	0.334045305	0.049244372	0.416532835	0.10271069	0.431512103	0.041859251	0.465680782	0.038666177	0.45379379	0.134427551	0.053775686	0.028353922	0.316879941	0.15040403	0.021406225	0.294752645
2. CVD Fall	1	Men	2011	99	0.60912664	0.040880928	0.005380691	0.110929345	0.123393579	0.004566137	0.10572268	0.475845363	0.25274426	0.098036264	0.039929137	0.133444976	0.502750982	0.176907543	0.074450693	0.245890782	0.0691109	0.535782328	0.128598837	0.022165962	0.244341973	0.074338979	0.52670573	0.071555518	0.327399773	0.050409877	0.43216383	0.09815244	0.419273853	0.072049848	0.450086542	0.037809098	0.440054512	0.116943665	0.084843925	0.00334451	0.034580081	0.449316854	0.021063686	0.289907279
2. CVD Fall	1	Men	2011	100	0.427837346	0.034292822	0.014471618	0.282294187	0.130619746	0.004532767	0.105951514	0.484006313	0.242086401	0.101445508	0.039087548	0.13337423	0.511436119	0.173547013	0.071907836	0.243109031	0.072415656	0.487378116	0.176741571	0.021851009	0.241613647	0.06081095	0.548815832	0.069189064	0.321184153	0.038230262	0.460083615	0.093938421	0.407747703	0.059306589	0.47653098	0.037042996	0.427119436	0.117939883	0.062894918	0.007742032	0.101861112	0.403366419	0.020773439	0.285422196
2. CVD Fall	1	Men	2012	35	0.991930933	0.001907955	0	0	0.003113834	0.000155976	0.002891302	0.981640676	0	0.012863246	0.001693019	0.003803058	0.967416675	0.020003687	0.004129293	0.008450345	0	0.990788363	0	0.000838262	0.008373374	0.040154371	0.942751762	0.003868757	0.01322511	0	0.971985659	0.006904283	0.021110058	0	0.974955463	0.001580271	0.023464266	0.067008055	0.003467831	0	0	0.91789654	0.00079127	0.010836305
2. CVD Fall	1	Men	2012	36	0.992484914	0.001618032	0	0	0.002926807	0.000149497	0.002820751	0.971023471	0	0.02364401	0.001622382	0.003710138	0.965366708	0.022435001	0.003955778	0.008242514	0	0.991029166	0	0.000803375	0.008167459	0.060724474	0.92267156	0.003706313	0.012897653	0	0.972806586	0.006611823	0.020581591	0	0.975610693	0.00151436	0.022874947	0.080636751	0.00397664	0	0	0.904059371	0.000758343	0.010568894
2. CVD Fall	1	Men	2012	37	0.991307157	0.002614044	0	0	0.003183582	0.000143288	0.002751929	0.974802165	0	0.020023671	0.001554674	0.00361949	0.983673116	0.004497761	0.003789426	0.008039696	0	0.991263551	0	0.000769938	0.007966511	0.094389678	0.889481755	0.003550579	0.012577988	0	0.973603203	0.006331376	0.020065422	0	0.976249564	0.001451183	0.022299253	0.072223124	0.003131212	0	0	0.913610989	0.000726784	0.01030789
2. CVD Fall	1	Men	2012	38	0.991366653	0.002672487	0	0	0.003138726	0.000137338	0.002684796	0.968638953	0	0.026340212	0.001489774	0.00353106	0.953214405	0.035313887	0.003629939	0.007841769	0	0.991491701	0	0.000737889	0.00777041	0.09135525	0.892977559	0.003401274	0.012265917	0	0.974376332	0.006062441	0.019561227	0	0.976872552	0.001390626	0.021736822	0.07896948	0.005344794	0	0	0.904936056	0.000696537	0.010053133
2. CVD Fall	1	Men	2012	39	0.990469142	0.002607628	0	0	0.004172284	0.000131635	0.002619311	0.981856225	0	0.013271415	0.001427566	0.003444795	0.966236784	0.022637573	0.003477032	0.007648611	0	0.991713792	0	0.000707173	0.007579036	0.079816579	0.904964039	0.003258132	0.011961249	0	0.975126772	0.005804537	0.019068691	0	0.977480119	0.001332582	0.021187299	0.06159259	0.005900624	0	0	0.922034773	0.000667547	0.009804466
2. CVD Fall	1	Men	2012	40	0.991090124	0.002275298	0	0	0.002755016	0.000245984	0.003633578	0.976703909	0	0.015850613	0.002666977	0.004778501	0.965427386	0.017471967	0.006493114	0.010607532	0	0.98816759	0	0.00132133	0.01051108	0.077374033	0.899956601	0.006084602	0.016584764	0	0.962735896	0.01083451	0.026429594	0	0.968147686	0.002489575	0.029362739	0.076017466	0.006840772	0	0	0.902298616	0.0012473	0.013595847
2. CVD Fall	1	Men	2012	41	0.988178615	0.002662144	0	0	0.00537848	0.000235772	0.003544988	0.979590759	0	0.013191919	0.002555544	0.004661778	0.968169425	0.015265552	0.006219074	0.010345949	0	0.988481765	0	0.001266318	0.010251917	0.095910557	0.882089553	0.005828077	0.016171814	0	0.963866844	0.010372054	0.025761102	0	0.968997781	0.002385603	0.028616615	0.080338773	0.004173866	0	0	0.901033036	0.00119538	0.013258945
2. CVD Fall	1	Men	2012	42	0.988958205	0.003036329	0	0	0.004320899	0.000225986	0.003458581	0.974748802	0	0.018254546	0.002448733	0.00454792	0.944823008	0.039130007	0.005956324	0.010090661	0	0.988787416	0	0.001213593	0.009998991	0.065269534	0.91337973	0.005582128	0.015768607	0	0.964963576	0.009928523	0.025107901	0	0.969826653	0.002285945	0.027887402	0.070878336	0.006039574	0	0	0.909006401	0.001145619	0.01293007
2. CVD Fall	1	Men	2012	43	0.988138532	0.002749423	0	0	0.005521134	0.000216607	0.003374305	0.975235004	0	0.017981789	0.00234635	0.004436857	0.957644485	0.026809608	0.005704394	0.009841513	0	0.989084789	0	0.00116306	0.009752151	0.09816903	0.881109758	0.005346314	0.015374898	0	0.966027292	0.009503129	0.024469579	0	0.970634939	0.00219042	0.027174641	0.089442116	0.005136601	0	0	0.891714332	0.001097927	0.012609023
2. CVD Fall	1	Men	2012	44	0.987858029	0.002999784	0	0	0.005642459	0.000207619	0.00329211	0.95881254	0	0.034610721	0.002248213	0.004328526	0.975311844	0.009626967	0.005462835	0.009598355	0	0.989374125	0	0.001114628	0.009511248	0.077160349	0.902728992	0.005120215	0.014990443	0	0.967059147	0.009095116	0.023845737	0	0.97142326	0.002098858	0.026477882	0.078773884	0.006333537	0	0	0.901544752	0.001052219	0.012295608
2. CVD Fall	1	Men	2012	45	0.985728307	0.003432493	0	0	0.00597864	0.000348338	0.004512223	0.967221083	0	0.023075936	0.003770604	0.005932378	0.971665008	0.006027691	0.009156687	0.013150613	0	0.985098873	0	0.001869789	0.013031338	0.060398332	0.910487225	0.008582929	0.020531514	0	0.952122523	0.01523501	0.032642466	0	0.960239988	0.003520207	0.036239805	0.066748909	0.007430355	0	0	0.907212293	0.001765118	0.016843325
2. CVD Fall	1	Men	2012	46	0.984510096	0.003683977	0	0	0.007069635	0.00033389	0.004402402	0.970117187	0	0.020482438	0.003612776	0.005787598	0.944001476	0.034405353	0.008767933	0.012825238	0	0.985499093	0	0.00179192	0.012708987	0.064604032	0.907160444	0.008219081	0.020016444	0	0.953616949	0.014577922	0.031805129	0	0.961322928	0.003372958	0.035304113	0.064530304	0.006516046	0	0	0.910838343	0.001691628	0.01642368
2. CVD Fall	1	Men	2012	47	0.985828856	0.003452554	0	0	0.006103237	0.000320045	0.004295308	0.973569469	0	0.017322642	0.003461494	0.005646394	0.963909923	0.015187239	0.00839516	0.012507678	0	0.985888328	0	0.001717291	0.012394381	0.073689086	0.898927303	0.007870203	0.019513407	0	0.955065863	0.01394761	0.030986527	0	0.962379081	0.003231819	0.0343891	0.077798879	0.00842493	0	0	0.896141019	0.001621198	0.016013974
2. CVD Fall	1	Men	2012	48	0.985289849	0.003560928	0	0	0.006651564	0.000306778	0.004190881	0.965175361	0	0.025999468	0.003316487	0.005508685	0.951971833	0.027792721	0.008037703	0.012197744	0	0.986266897	0	0.001645769	0.012087334	0.077686944	0.895755283	0.007535674	0.019022099	0	0.956470886	0.013342962	0.030186152	0	0.963409268	0.003096537	0.033494195	0.081800353	0.008391653	0	0	0.892640334	0.001553699	0.015613961
2. CVD Fall	1	Men	2012	49	0.984261649	0.004237606	0	0	0.007117621	0.000294065	0.004089059	0.966647557	0	0.024800559	0.003177495	0.005374389	0.947518432	0.03289139	0.007694926	0.011895251	0	0.986635111	0	0.001577225	0.011787664	0.064940978	0.909301904	0.007214896	0.018542222	0	0.957833582	0.012762911	0.029403506	0	0.96441429	0.002966869	0.032618841	0.08448648	0.007294221	0	0	0.891506886	0.001489012	0.015223401
2. CVD Fall	1	Men	2012	50	0.972497567	0.004516771	3.99E-05	0.008706709	0.00783585	0.000473546	0.005929703	0.946075619	0.021854455	0.019162859	0.005114169	0.007792898	0.936500882	0.033884163	0.01237476	0.017240195	0.005591287	0.96063868	0.014146358	0.002539281	0.017084395	0.067011028	0.894523978	0.011603806	0.026861188	0.074899961	0.862031488	0.020505999	0.042562551	0.076981159	0.871037408	0.004775351	0.047206082	0.076301482	0.008057152	0.000162722	0.01963348	0.871389286	0.002397299	0.022058579
2. CVD Fall	1	Men	2012	51	0.976154606	0.005172478	2.27E-05	0.004356098	0.008054266	0.000453939	0.005785865	0.958319544	0.005572491	0.023605204	0.004899646	0.007603116	0.967013049	0.004329777	0.011845217	0.016811957	0.006706244	0.962873705	0.011326359	0.002433528	0.016660164	0.074482182	0.888228846	0.011108294	0.026180678	0.03464342	0.904297523	0.019609124	0.041449934	0.120260775	0.829203164	0.004575229	0.045960832	0.077642058	0.008153803	6.24E-06	0.000758118	0.889637097	0.0022975	0.021505187
2. CVD Fall	1	Men	2012	52	0.980383608	0.004591645	4.55E-06	0.000984389	0.007955008	0.000435152	0.005645651	0.949040731	0.013640344	0.02520682	0.004694027	0.007418078	0.940342417	0.031926181	0.011337395	0.016394006	0.005743057	0.965196203	0.010482422	0.002332186	0.016246131	0.06051893	0.903332039	0.010633132	0.025515899	0.076278936	0.86461085	0.018748643	0.04036157	0.095224008	0.855650284	0.004383419	0.044742289	0.084015622	0.010241609	6.98E-05	0.006700985	0.875805272	0.002201863	0.020964832
2. CVD Fall	1	Men	2012	53	0.975985727	0.00562539	1.76E-05	0.003103727	0.009341404	0.000417153	0.005508984	0.956669551	0.006799064	0.024796757	0.004496947	0.00723768	0.953475226	0.019688277	0.010850396	0.015986101	0.006715084	0.965497118	0.009710668	0.002235074	0.015842055	0.082090888	0.882865182	0.010177477	0.024866453	0.066870504	0.875909641	0.017923053	0.039296801	0.084208572	0.868042136	0.004199578	0.043549714	0.085350369	0.011292141	0.000148757	0.012853453	0.867807864	0.00211022	0.020437196
2. CVD Fall	1	Men	2012	54	0.97654441	0.005876181	1.38E-05	0.002321544	0.009468411	0.000399909	0.00537579	0.96427695	0.001667731	0.022685441	0.004308054	0.007061824	0.94284046	0.031188174	0.01038336	0.015588006	0.008425429	0.959876868	0.014107981	0.002142017	0.015447705	0.085810581	0.880216938	0.009740524	0.024231958	0.061302697	0.883311398	0.017130917	0.038254987	0.076193998	0.877400231	0.00402338	0.042382391	0.080562549	0.010419878	0	0	0.887073198	0.002022405	0.01992197
2. CVD Fall	1	Men	2012	55	0.966556667	0.006083572	5.07E-05	0.008213485	0.010038185	0.000625467	0.008431929	0.952677846	0.001415693	0.028098592	0.006732858	0.011075012	0.917135981	0.042224911	0.016208843	0.024430265	0.007881342	0.952132717	0.01242625	0.003349047	0.024210644	0.07607517	0.870765797	0.015207216	0.037951817	0.067861084	0.845582367	0.026707631	0.059848918	0.083617192	0.843809741	0.006288297	0.06628477	0.089982959	0.012201338	0	0	0.86344152	0.003162105	0.031212079
2. CVD Fall	1	Men	2012	56	0.966035907	0.006314857	4.49E-05	0.007009423	0.011766633	0.000599651	0.008228665	0.955758691	0.003893597	0.02309143	0.006449784	0.010806498	0.918179935	0.042491128	0.01550808	0.023820858	0.008615958	0.950306072	0.01426131	0.003209667	0.023606994	0.07343876	0.875031301	0.014551668	0.036978272	0.109257196	0.806979713	0.025517855	0.058245236	0.084602527	0.844886812	0.006024266	0.064486395	0.08866456	0.011336573	0.000419434	0.035258823	0.830867609	0.003030579	0.030422423
2. CVD Fall	1	Men	2012	57	0.962628906	0.006091663	6.64E-05	0.010719814	0.011887621	0.000574923	0.00803065	0.949311846	0.011051354	0.02291347	0.006178491	0.010544838	0.923913857	0.038023954	0.014836028	0.023226161	0.007250765	0.947443158	0.019212025	0.003076125	0.023017928	0.05769838	0.892351585	0.013923016	0.036027018	0.072387231	0.846560988	0.02437622	0.056675561	0.07822986	0.853273526	0.005771232	0.062725383	0.074915373	0.012671008	0.000337793	0.025628693	0.853891247	0.002904565	0.029651321
2. CVD Fall	1	Men	2012	58	0.962044499	0.006420906	6.54E-05	0.010011633	0.013068581	0.000551238	0.007837782	0.931256093	0.025187666	0.027347847	0.005918497	0.010289897	0.900146164	0.063016479	0.014191511	0.022645846	0.010629956	0.945675447	0.018303292	0.002948185	0.022443121	0.067510983	0.884071341	0.013320161	0.035097515	0.064807978	0.856772255	0.02328077	0.055138997	0.099134665	0.83433585	0.005528746	0.061000739	0.093217965	0.014089916	6.45E-06	0.000451008	0.860552485	0.002783838	0.02889834
2. CVD Fall	1	Men	2012	59	0.962189475	0.006880584	6.40E-05	0.009153178	0.013534233	0.000528554	0.007649966	0.936915226	0.017840959	0.029532929	0.005669343	0.010041544	0.928939694	0.035407303	0.013573405	0.022079598	0.009827348	0.950007949	0.015456823	0.002825618	0.021882262	0.065073151	0.887995561	0.012742047	0.034189241	0.045577379	0.8785583	0.022229636	0.053634685	0.075884585	0.859507524	0.005296379	0.059311511	0.085994121	0.012141646	4.60E-05	0.003726819	0.867260185	0.002668185	0.028163062
2. CVD Fall	1	Men	2012	60	0.965223396	0.006763824	1.90E-05	0.002778619	0.012548216	0.000786212	0.011880758	0.927563182	0.019813225	0.028607492	0.008424076	0.015592025	0.895376468	0.050236284	0.020135916	0.034251333	0.00733275	0.934068687	0.020451771	0.004201049	0.033945744	0.076605461	0.851503076	0.018905845	0.052985618	0.052715031	0.831372784	0.032918648	0.082993537	0.08668201	0.813711004	0.007870494	0.091736492	0.095544039	0.012763483	0.000240326	0.018240905	0.825576843	0.00396711	0.043667293
2. CVD Fall	1	Men	2012	61	0.956765831	0.00729105	6.41E-05	0.008649226	0.014878289	0.000753947	0.011597569	0.943916455	0.002853046	0.029944048	0.00806919	0.01521726	0.909905683	0.037446494	0.0192541	0.033393722	0.009562184	0.932637879	0.020676996	0.004026598	0.033096342	0.064020549	0.866292578	0.0180812	0.051605672	0.060817321	0.827066446	0.031417409	0.080698824	0.094669331	0.808633898	0.00753955	0.089157221	0.085277626	0.012719381	0	0	0.855648637	0.003802507	0.042551849
2. CVD Fall	1	Men	2012	62	0.957258469	0.00702001	5.37E-05	0.007543521	0.016079201	0.000723057	0.011322001	0.937339434	0.008754018	0.031324973	0.007729159	0.014852416	0.886160616	0.062873809	0.018408469	0.032557106	0.010160719	0.929577945	0.02413406	0.003859517	0.032267759	0.07430441	0.858147935	0.017290451	0.050257203	0.044478914	0.847092417	0.029976987	0.078451682	0.094383706	0.811763647	0.007222475	0.086630173	0.088790747	0.015952944	0.000257519	0.01562848	0.834262717	0.00364486	0.041462732
2. CVD Fall	1	Men	2012	63	0.953043537	0.008207188	8.05E-05	0.009633245	0.017288108	0.000693486	0.011053931	0.931238609	0.013387433	0.033473247	0.007403386	0.014497325	0.907887983	0.042773388	0.017597567	0.031741062	0.010376014	0.928334345	0.026130553	0.003699511	0.031459577	0.068520482	0.866007773	0.016532235	0.04893951	0.042567388	0.852586643	0.028594981	0.076250989	0.077265333	0.831661836	0.006918711	0.08415412	0.088004627	0.015746194	0.000271235	0.016662498	0.835422173	0.003493893	0.04039938
2. CVD Fall	1	Men	2012	64	0.955122491	0.008195426	7.29E-05	0.008749561	0.016401147	0.000665183	0.010793244	0.920512311	0.01937212	0.038872438	0.007091301	0.01415183	0.898760354	0.05347445	0.016820006	0.03094519	0.010916492	0.93311279	0.02175302	0.003546298	0.0306714	0.068741393	0.867801434	0.01580525	0.047651923	0.085564864	0.813070344	0.027269105	0.074095688	0.093854389	0.817789967	0.006627726	0.081727918	0.100037721	0.0163887	0.000259414	0.015322785	0.825280781	0.00334934	0.039361259
2. CVD Fall	1	Men	2012	65	0.948006193	0.008454933	7.83E-05	0.009097439	0.017071523	0.000994551	0.016297062	0.919258674	0.01353162	0.035260556	0.010586698	0.021362452	0.861227518	0.067069986	0.025053956	0.04664854	0.010579925	0.914858052	0.023026482	0.005298698	0.046236843	0.070129421	0.834586831	0.023548004	0.071735745	0.067465214	0.780709673	0.040519695	0.111305418	0.08367636	0.783733407	0.009895691	0.122694542	0.093642148	0.016220768	0.000431969	0.025507847	0.799897813	0.005004642	0.059294814
2. CVD Fall	1	Men	2012	66	0.944254148	0.008611652	9.00E-05	0.010247562	0.019926195	0.000954161	0.015916329	0.918308426	0.015226186	0.035467706	0.010140436	0.020857246	0.86440023	0.066181319	0.023939864	0.045478587	0.011863527	0.905946933	0.032031409	0.005079839	0.045078291	0.078080879	0.829577526	0.02250654	0.069835055	0.065420662	0.787852505	0.038618116	0.108108717	0.079282127	0.792145797	0.009479655	0.119092422	0.099190003	0.016304374	0	0	0.821942108	0.004798166	0.057765349
2. CVD Fall	1	Men	2012	67	0.942028739	0.009776749	0.000112183	0.011232072	0.020388177	0.000915524	0.015546556	0.921765922	0.011581796	0.036572959	0.009713076	0.020366247	0.881133163	0.051656851	0.022871823	0.044338162	0.012186655	0.906657476	0.032336471	0.00487037	0.043949028	0.065107949	0.845405704	0.021508204	0.067978144	0.053048239	0.805179477	0.036794331	0.104977953	0.086469979	0.788885904	0.009081267	0.11556285	0.093854444	0.016364635	0.000354301	0.020837278	0.807716116	0.004600555	0.056272672
2. CVD Fall	1	Men	2012	68	0.93981593	0.00978314	0.000119405	0.011938612	0.022276721	0.000878573	0.015187618	0.907748173	0.022404781	0.040653887	0.00930388	0.019889278	0.871025978	0.063899199	0.021848043	0.04322678	0.013658851	0.905361857	0.033460792	0.004669927	0.042848572	0.067539518	0.845744969	0.020551316	0.066164197	0.064309814	0.798732823	0.035045422	0.101911941	0.081463732	0.797731835	0.00869984	0.112104593	0.093825743	0.016650583	0.000303301	0.01758649	0.812406289	0.004411466	0.054816129
2. CVD Fall	1	Men	2012	69	0.940551704	0.009241556	0.000124024	0.013118535	0.021281529	0.000843246	0.014839405	0.910398408	0.017094266	0.044169003	0.008912145	0.019426179	0.867861775	0.069127419	0.020866818	0.042143988	0.013662294	0.90213544	0.037947626	0.004478164	0.041776478	0.079321016	0.836652249	0.019634276	0.064392459	0.061737763	0.805984007	0.033368617	0.098909614	0.054378197	0.828570525	0.008334716	0.108716562	0.105819145	0.01904218	0	0	0.817512993	0.004230572	0.05339511
2. CVD Fall	1	Men	2012	70	0.925592841	0.010148484	0.000151618	0.014568427	0.024070652	0.001418125	0.024049852	0.891837385	0.018466885	0.043268258	0.014956286	0.031471186	0.820753936	0.076194154	0.034909201	0.068142708	0.015793528	0.869589923	0.039541998	0.007523955	0.067550596	0.069114063	0.79410895	0.032857792	0.103919195	0.038183389	0.747017214	0.055642475	0.159156921	0.084444811	0.726773836	0.013989366	0.174791988	0.096731028	0.018394358	0.000343646	0.017995861	0.773174743	0.007108427	0.086251938
2. CVD Fall	1	Men	2012	71	0.92087643	0.010646974	0.000190258	0.017365686	0.026051556	0.001361606	0.023507489	0.892512847	0.023231063	0.039179859	0.014327714	0.030748517	0.838917494	0.06131178	0.033330906	0.066439819	0.01095024	0.878275736	0.037692604	0.007216709	0.065864711	0.068416113	0.799083344	0.031382969	0.101117575	0.047543495	0.745127964	0.052943936	0.154384605	0.071093934	0.746100697	0.013403598	0.169401771	0.091838396	0.019873594	0	0	0.797458962	0.006818623	0.084010425
2. CVD Fall	1	Men	2012	72	0.921715859	0.011366304	0.000196059	0.016760563	0.025671086	0.001307626	0.022982504	0.889869423	0.023082997	0.043272967	0.013726373	0.03004824	0.844008932	0.059389577	0.031819039	0.064782452	0.015511256	0.871628743	0.041712996	0.006923016	0.064223989	0.0651247	0.806522182	0.029970326	0.098382791	0.062422423	0.737505142	0.050358586	0.149713849	0.067503389	0.755529249	0.012843259	0.164124102	0.108793129	0.021766821	0	0	0.781073172	0.006541618	0.081825259
2. CVD Fall	1	Men	2012	73	0.912969376	0.011741073	0.000275687	0.022666184	0.028616774	0.001256094	0.022474812	0.882531213	0.032663429	0.042283894	0.013151249	0.029370215	0.825885491	0.080573259	0.030371155	0.063170095	0.014722684	0.871865936	0.044141074	0.006642379	0.062627926	0.071378192	0.804290248	0.028617566	0.095713994	0.055079124	0.751894654	0.047882495	0.145143727	0.076059375	0.752675032	0.012307405	0.158958187	0.098896602	0.023199205	0.000600809	0.024643247	0.766687453	0.006276943	0.079695742
2. CVD Fall	1	Men	2012	74	0.916463003	0.012456184	0.000218645	0.01703172	0.030639171	0.001206922	0.021984354	0.881207202	0.032288008	0.045189076	0.012601379	0.028714335	0.849294613	0.060118156	0.028984931	0.0616023	0.019559082	0.874339989	0.038650523	0.006374327	0.061076079	0.074732975	0.804834083	0.027322507	0.093110436	0.059094016	0.754720517	0.045511933	0.140673534	0.074783921	0.75951745	0.011795138	0.153903491	0.100149442	0.021188395	0.001753414	0.07467536	0.718587981	0.006024151	0.077621257
2. CVD Fall	1	Men	2012	75	0.890114472	0.012528083	0.000329546	0.025300841	0.034130325	0.002019979	0.035576754	0.869846839	0.019668006	0.043015494	0.021027878	0.046441783	0.769468826	0.083006703	0.048161619	0.099362853	0.019521156	0.818198611	0.053107782	0.01065409	0.09851836	0.065210759	0.7395761	0.045418895	0.149794246	0.03781524	0.661456082	0.075300399	0.225428279	0.072001092	0.661950922	0.019686639	0.246361348	0.107110136	0.02384916	0.00040715	0.016378188	0.71715031	0.010069724	0.125035331
2. CVD Fall	1	Men	2012	76	0.895000846	0.014733262	0.000307064	0.020108969	0.033085201	0.00194216	0.034822499	0.846820043	0.038711637	0.048884715	0.020153637	0.045429969	0.788689066	0.06844427	0.045951178	0.096915485	0.019410164	0.82324467	0.05102006	0.010228854	0.096096252	0.062292596	0.748652247	0.043354092	0.145701064	0.05168485	0.658429686	0.07152188	0.218363584	0.080502945	0.662256268	0.018872385	0.238368402	0.102909089	0.027728754	8.13E-05	0.0028409	0.734987356	0.009668756	0.12178388
2. CVD Fall	1	Men	2012	77	0.883362175	0.014558622	0.000418567	0.027528401	0.038167452	0.001868048	0.034096734	0.842794337	0.044564883	0.048867367	0.019318835	0.044454578	0.785036083	0.076586552	0.043837166	0.0945402	0.01464911	0.826470748	0.055311152	0.009823313	0.093745676	0.076006516	0.740900886	0.04137948	0.141713118	0.059908027	0.660719593	0.067909597	0.211462784	0.074995386	0.6763504	0.018094973	0.230559241	0.1004845	0.02699409	0	0	0.74461384	0.009286392	0.118621178
2. CVD Fall	1	Men	2012	78	0.889527381	0.014297899	0.000370548	0.024891	0.035716094	0.001797525	0.033399553	0.862428679	0.024994267	0.050539281	0.018522116	0.043515657	0.788102656	0.077844382	0.041816302	0.09223666	0.021089122	0.813336081	0.064671681	0.00943681	0.091466305	0.066846439	0.755831722	0.039491976	0.137829863	0.062731836	0.668083769	0.064458291	0.204726103	0.073479692	0.686232571	0.017353139	0.222934598	0.113912735	0.030915226	0	0	0.730703293	0.008922012	0.115546734
2. CVD Fall	1	Men	2012	79	0.878953991	0.015649595	0.000494045	0.030109	0.040331793	0.00173048	0.032731096	0.844982283	0.0441877	0.050454508	0.017762194	0.042613315	0.778550997	0.091558896	0.039885478	0.09000463	0.021531806	0.825899532	0.054242033	0.009068722	0.089257907	0.075666332	0.752594092	0.037688655	0.13405092	0.063066834	0.677616114	0.061162965	0.198154087	0.048242027	0.719616719	0.016645684	0.215495569	0.107333126	0.027549368	0.002244324	0.073084503	0.668653465	0.008575028	0.112560186
2. CVD Fall	1	Men	2012	80	0.848339312	0.018365877	0.000709489	0.036484515	0.036847104	0.003066444	0.056187259	0.803337065	0.045556149	0.046668398	0.031344716	0.073093672	0.686887052	0.089326225	0.069985782	0.153800941	0.022295039	0.758071789	0.051059733	0.016039445	0.152533994	0.075341314	0.630222346	0.066168391	0.228267949	0.046391503	0.511150843	0.106737882	0.335719772	0.063631099	0.54238434	0.029382893	0.364601668	0.112015386	0.036099524	0	0	0.64471724	0.015168208	0.191999642
2. CVD Fall	1	Men	2012	81	0.844132202	0.019796525	0.000766161	0.036493606	0.040737584	0.002955333	0.055118589	0.789088951	0.051399951	0.057792721	0.030075494	0.071642882	0.689551592	0.093556649	0.066748914	0.150142844	0.028960555	0.7366168	0.070080366	0.01542686	0.148915419	0.080172	0.634666471	0.063145514	0.222016015	0.047395271	0.526586561	0.10122347	0.324794698	0.060936075	0.558627132	0.028201755	0.352235038	0.10516946	0.028808877	0.000808733	0.026497074	0.637047552	0.014590888	0.187077416
2. CVD Fall	1	Men	2012	82	0.831171527	0.017672034	0.000804972	0.04276119	0.050638689	0.002850085	0.054101503	0.808051215	0.037442629	0.055381195	0.028867632	0.070257328	0.700959976	0.088768092	0.063662228	0.146609704	0.023722664	0.740576	0.075435337	0.014845116	0.145420882	0.070521739	0.653268915	0.060262982	0.215946364	0.043138985	0.546726421	0.09597089	0.314163704	0.055814293	0.576905432	0.027077966	0.340202309	0.114635557	0.037503284	0.00158683	0.039007327	0.610915829	0.014042715	0.182308456
2. CVD Fall	1	Men	2012	83	0.84384039	0.020320426	0.000706026	0.032871986	0.046374009	0.002750546	0.053136616	0.778497253	0.06246524	0.062380638	0.027719251	0.068937619	0.683460758	0.112616421	0.060721076	0.143201744	0.027975562	0.737016	0.078664499	0.014293326	0.142050613	0.074068978	0.658355219	0.057516433	0.21005937	0.052507318	0.552690717	0.09097246	0.303829505	0.066769666	0.578713292	0.026009782	0.32850726	0.120488283	0.030241284	0.005156549	0.140517587	0.5123805	0.013522855	0.177692942
2. CVD Fall	1	Men	2012	84	0.841239963	0.023496687	0.000587333	0.023799515	0.055995284	0.002656577	0.052224641	0.785478941	0.062833509	0.057374504	0.026628579	0.067684467	0.694687371	0.107472267	0.057921035	0.139919326	0.027385093	0.722362672	0.097676596	0.013770663	0.138804976	0.077798364	0.662944309	0.054901717	0.204355611	0.046874257	0.573109877	0.086220773	0.293795093	0.061594706	0.59625582	0.024995556	0.317153918	0.108900862	0.033066085	0.004015675	0.104276784	0.563478848	0.013030529	0.173231217
2. CVD Fall	1	Men	2012	85	0.833550764	0.025210088	0.00058559	0.02211551	0.052770351	0.003240245	0.062527453	0.771794038	0.071957978	0.043006985	0.032293245	0.080947754	0.659968389	0.103830535	0.069721811	0.166479264	0.026740602	0.702875695	0.088465765	0.016751484	0.165166454	0.080453091	0.611372669	0.066134642	0.242039598	0.045118937	0.50599889	0.103096162	0.345786011	0.077787153	0.519221159	0.03032465	0.372667037	0.121497121	0.035115319	0.007108518	0.161244678	0.453552286	0.015853949	0.205628129
2. CVD Fall	1	Men	2012	86	0.76006511	0.02954536	0.002897604	0.086416195	0.056391268	0.003135269	0.061549194	0.728775992	0.100143124	0.060436917	0.031056528	0.079587439	0.650252763	0.120426873	0.066529211	0.162791153	0.040321174	0.683262756	0.098732486	0.016162671	0.161520913	0.096424255	0.604876743	0.063153466	0.235545535	0.036861115	0.531129498	0.097696493	0.334312895	0.068234144	0.542896517	0.029175375	0.359693963	0.109044052	0.051848617	0.004025474	0.068019972	0.551189014	0.015299575	0.200573297
2. CVD Fall	1	Men	2012	87	0.768823202	0.022565152	0.002047856	0.081154311	0.061733963	0.003036886	0.060638631	0.749622314	0.083925877	0.058253663	0.029886677	0.078311469	0.663311392	0.113931267	0.063499368	0.159257973	0.021610879	0.699758795	0.104993213	0.015607905	0.158029208	0.078921183	0.631476736	0.060324326	0.229277755	0.034910442	0.549291231	0.092581739	0.323216589	0.052473616	0.572285699	0.028088672	0.347152013	0.113377276	0.022959649	0.0204517	0.450662431	0.182063662	0.01477741	0.195707873
2. CVD Fall	1	Men	2012	88	0.785369619	0.025041563	0.001986675	0.071517009	0.053343067	0.002944983	0.059797083	0.764247511	0.059361102	0.070488274	0.028781936	0.077121176	0.644673059	0.138818735	0.060627589	0.155880616	0.029357625	0.671601246	0.129262476	0.015086419	0.154692233	0.060789139	0.658330462	0.057642847	0.223237552	0.050202104	0.549553442	0.087743476	0.312500978	0.068734394	0.569156784	0.027062918	0.335045903	0.107641186	0.038919227	0.011391853	0.215036462	0.421691743	0.014286738	0.191032791
2. CVD Fall	1	Men	2012	89	0.801626611	0.022907324	0.001205593	0.048792233	0.063582793	0.002859464	0.059025981	0.714091056	0.109009129	0.073141169	0.027740651	0.076017995	0.659505739	0.129924905	0.057909341	0.152660015	0.030563167	0.695740972	0.107587423	0.014597512	0.151510927	0.068096165	0.659372786	0.055104808	0.217426241	0.051892325	0.562764583	0.083173398	0.302169693	0.066340555	0.584182928	0.026096591	0.323379927	0.122278356	0.037301818	0.007099791	0.152799626	0.480144483	0.013826905	0.186549019
2. CVD Fall	1	Men	2012	90	0.691965306	0.026901064	0.002441158	0.080754942	0.076778299	0.00533405	0.11582518	0.637339031	0.084506833	0.077869773	0.051342889	0.148941474	0.452047753	0.144709886	0.106173151	0.29706921	0.042366558	0.52955958	0.106081249	0.027129376	0.294863237	0.065891004	0.41230857	0.101119489	0.420680937	0.051031631	0.217364087	0.15130337	0.580300912	0.070304494	0.261489101	0.048324999	0.619881406	0.129625176	0.033837817	0.019480035	0.345876675	0.083550771	0.025703458	0.361926069
2. CVD Fall	1	Men	2012	91	0.702561063	0.028177802	0.00219976	0.070214224	0.0770701	0.00519403	0.114583021	0.61678203	0.125417465	0.061114747	0.049579786	0.147105972	0.49610536	0.111070685	0.101522062	0.291301894	0.034534538	0.500380385	0.149602612	0.026312803	0.289169663	0.077597882	0.415567612	0.09677723	0.410057276	0.048763332	0.246389658	0.143517213	0.561329797	0.055330808	0.299494374	0.046690973	0.598483845	0.147540297	0.052532971	0.006592832	0.104912325	0.309697738	0.024936253	0.353787584
2. CVD Fall	1	Men	2012	92	0.657670561	0.032030144	0.004307667	0.114237374	0.073197944	0.005065879	0.113490431	0.596622618	0.135785916	0.074208609	0.047929907	0.145452949	0.494676372	0.122331584	0.097140809	0.285851236	0.046883357	0.505026801	0.138743851	0.025555367	0.283790624	0.06404084	0.443376968	0.092687261	0.399894931	0.049639816	0.27102389	0.136198413	0.543137881	0.05303216	0.323826919	0.045163158	0.577977763	0.128674167	0.059170108	0	0	0.441896419	0.024225101	0.346034206
2. CVD Fall	1	Men	2012	93	0.689951043	0.03449012	0.003482084	0.088218783	0.066357468	0.00494953	0.112550972	0.619574917	0.116861774	0.073186824	0.046390696	0.143985789	0.454986422	0.17127343	0.093021456	0.280718692	0.039555794	0.530673933	0.126186524	0.024856153	0.278727596	0.070555599	0.450406766	0.088842262	0.390195373	0.046021256	0.298919693	0.129331264	0.525727787	0.068128983	0.329766441	0.043739228	0.558365349	0.13317999	0.046838808	0.008387483	0.143487341	0.305870079	0.023569165	0.338667134
2. CVD Fall	1	Men	2012	94	0.649149296	0.042968921	0.004666888	0.093303281	0.093298328	0.004844952	0.111768334	0.555478615	0.178865175	0.077988582	0.044959703	0.142707925	0.523143921	0.111794525	0.089156149	0.275905405	0.055011159	0.501187403	0.145605355	0.024214339	0.273981744	0.060772317	0.473033235	0.085235002	0.380959447	0.037444932	0.330554671	0.122899998	0.509100399	0.05735881	0.360577652	0.042416965	0.539646573	0.121125498	0.044474432	0.005753681	0.10879733	0.365194244	0.0229677	0.331687115
2. CVD Fall	1	Men	2012	95	0.664750769	0.040190829	0.004082401	0.088126832	0.086950719	0.00475214	0.111146311	0.645997858	0.096893959	0.071850821	0.043634573	0.141622789	0.492014923	0.151035895	0.085537076	0.271412106	0.068977645	0.466514866	0.171324467	0.023629192	0.26955383	0.060490585	0.485463874	0.0818583	0.372187241	0.04680292	0.343053653	0.116888753	0.493254675	0.039927558	0.397059199	0.041194246	0.521818998	0.126361721	0.056947648	0.019650785	0.236892125	0.212633342	0.022420048	0.325094332
2. CVD Fall	1	Men	2012	96	0.608806404	0.041389327	0.006298807	0.125784509	0.102361065	0.004671126	0.110688763	0.539405239	0.19637379	0.081074185	0.042413021	0.140733765	0.461857097	0.188747449	0.082156429	0.267239024	0.067252821	0.473886103	0.170316904	0.023100055	0.265444116	0.060924956	0.49649209	0.078704996	0.363877958	0.026823143	0.383707814	0.111281564	0.478187479	0.057822122	0.397231234	0.040069018	0.504877626	0.112761788	0.050665142	0.036973352	0.384911489	0.073874312	0.021925625	0.318888291
2. CVD Fall	1	Men	2012	97	0.605790189	0.039774658	0.005966635	0.124476448	0.108990521	0.004601969	0.110399579	0.497247681	0.23481869	0.086596684	0.041292816	0.140044129	0.498049205	0.159558626	0.079006381	0.263385788	0.076320383	0.500858712	0.138542289	0.022626345	0.261652271	0.070863052	0.497339242	0.075767912	0.356029793	0.026676097	0.403368085	0.106062355	0.463893463	0.04975828	0.42238763	0.039039287	0.488814803	0.126341756	0.092257013	0.00697192	0.063289043	0.376588624	0.021483923	0.31306772
2. CVD Fall	1	Men	2012	98	0.524585273	0.038221139	0.009364946	0.187435147	0.125566098	0.004544765	0.110282633	0.463354666	0.284826872	0.071989712	0.040271759	0.139556991	0.553718205	0.11035141	0.076079052	0.259851333	0.065281715	0.508235928	0.146097543	0.022207539	0.258177275	0.066366302	0.511954033	0.073039833	0.348639832	0.049244372	0.399175701	0.101214947	0.450364979	0.041859251	0.446417496	0.038103094	0.473620159	0.134427551	0.057226609	0.028946694	0.306965855	0.143708333	0.021094493	0.307630465
2. CVD Fall	1	Men	2012	99	0.604527589	0.044067794	0.005623553	0.107546112	0.123393579	0.004499641	0.110341732	0.477420687	0.245920165	0.098036264	0.039347662	0.139275221	0.493092151	0.176907543	0.073366492	0.256633815	0.07423462	0.520306038	0.128598837	0.021843166	0.255017338	0.074338979	0.513443588	0.070513478	0.341703955	0.050409877	0.415275008	0.096723077	0.437592038	0.072049848	0.431411047	0.037258496	0.459280608	0.116943665	0.091231051	0.003495468	0.03340516	0.431594311	0.020756942	0.302573403
2. CVD Fall	1	Men	2012	100	0.428215013	0.037364791	0.015169417	0.273583712	0.130619746	0.004466758	0.110580564	0.48528471	0.235550068	0.101445508	0.038518329	0.139201385	0.501861793	0.173547013	0.070860665	0.253730528	0.078013796	0.471542022	0.176741571	0.0215328	0.252169811	0.06081095	0.535790791	0.068181486	0.335216773	0.038230262	0.443637006	0.092570425	0.425562306	0.059306589	0.458409465	0.036503551	0.445780396	0.117939883	0.067982246	0.00811534	0.098528519	0.389070722	0.020470923	0.297892367
2. CVD Fall	1	Men	2013	35	0.991972627	0.00193292	0	0	0.003113834	0.00014775	0.002832869	0.981806822	0	0.012863246	0.001603733	0.003726198	0.967805225	0.020003687	0.003911523	0.008279564	0	0.991001797	0	0.000794054	0.008204149	0.040154371	0.94322307	0.003664728	0.012957831	0	0.972776408	0.006540167	0.020683425	0	0.975513015	0.001496932	0.022990054	0.067008055	0.003513205	0	0	0.918111896	0.00074954	0.010617304
2. CVD Fall	1	Men	2013	36	0.992534858	0.001632978	0	0	0.002926807	0.000141613	0.002763743	0.971184013	0	0.02364401	0.001536821	0.003635156	0.965741907	0.022435001	0.003747159	0.008075933	0	0.991236598	0	0.000761007	0.008002395	0.060724474	0.923127683	0.003510851	0.012636992	0	0.973571232	0.006263131	0.020165638	0	0.976152859	0.001434496	0.022412645	0.080636751	0.004013374	0	0	0.904276227	0.000718349	0.010355297
2. CVD Fall	1	Men	2013	37	0.991356111	0.002628263	0	0	0.003183582	0.000135732	0.002696313	0.974957305	0	0.020023671	0.001472684	0.00354634	0.984035444	0.004497761	0.003589581	0.007877214	0	0.991465159	0	0.000729333	0.007805508	0.094389678	0.889923205	0.003363329	0.012323787	0	0.974342626	0.005997474	0.0196599	0	0.976776763	0.001374651	0.021848586	0.072223124	0.003148244	0	0	0.913840608	0.000688455	0.010099568
2. CVD Fall	1	Men	2013	38	0.991423719	0.002676923	0	0	0.003138726	0.000130095	0.002630536	0.968788883	0	0.026340212	0.001411207	0.003459697	0.953564322	0.035313887	0.003438505	0.007683287	0	0.991687655	0	0.000698975	0.00761337	0.09135525	0.893404828	0.003221899	0.012018024	0	0.975091383	0.005742722	0.019165896	0	0.977385191	0.001317288	0.021297522	0.07896948	0.005353666	0	0	0.90516709	0.000659803	0.00984996
2. CVD Fall	1	Men	2013	39	0.990534861	0.002601788	0	0	0.004172284	0.000124693	0.002566375	0.98200113	0	0.013271415	0.00135228	0.003375175	0.966574733	0.022637573	0.003293661	0.007494033	0	0.991904258	0	0.000669878	0.007425864	0.079816579	0.905377602	0.003086306	0.011719513	0	0.975818267	0.005498419	0.018683314	0	0.977978591	0.001262305	0.020759105	0.06159259	0.005887408	0	0	0.922281341	0.000632342	0.009606319
2. CVD Fall	1	Men	2013	40	0.991133355	0.002260702	0	0	0.002755016	0.000241059	0.003609869	0.976788491	0	0.015850613	0.002613575	0.004747321	0.965626614	0.017471967	0.006363101	0.010538318	0	0.988262632	0	0.001294872	0.010442496	0.077374033	0.900186649	0.005962768	0.016476549	0	0.963125291	0.010617568	0.026257141	0	0.968389127	0.002439725	0.029171148	0.076017466	0.006796886	0	0	0.902456189	0.001222325	0.013507134
2. CVD Fall	1	Men	2013	41	0.98823578	0.002632831	0	0	0.00537848	0.000231051	0.003521857	0.979672347	0	0.013191919	0.002504374	0.00463136	0.968361458	0.015265552	0.006094547	0.010278442	0	0.988574015	0	0.001240962	0.010185023	0.095910557	0.882311771	0.00571138	0.016066293	0	0.964242617	0.010164371	0.025593012	0	0.969232272	0.002337836	0.028429893	0.080338773	0.004127907	0	0	0.901189445	0.001171445	0.01317243
2. CVD Fall	1	Men	2013	42	0.98903437	0.002987256	0	0	0.004320899	0.000221461	0.003436014	0.974827509	0	0.018254546	0.002399701	0.004518244	0.945008115	0.039130007	0.005837058	0.01002482	0	0.988876959	0	0.001189293	0.009933748	0.065269534	0.913594393	0.005470355	0.015665717	0	0.965326206	0.009729721	0.024944072	0	0.97005439	0.002240172	0.027705438	0.070878336	0.005941962	0	0	0.90921132	0.00112268	0.012845702
2. CVD Fall	1	Men	2013	43	0.988225053	0.002689256	0	0	0.005521134	0.000212269	0.003352287	0.975310936	0	0.017981789	0.002299368	0.004407907	0.957822921	0.026809608	0.005590173	0.009777297	0	0.98917171	0	0.001139771	0.009688518	0.09816903	0.881317129	0.005239264	0.015274577	0	0.966377239	0.009312845	0.024309915	0	0.970856113	0.00214656	0.026997327	0.089442116	0.005024194	0	0	0.891930997	0.001075943	0.01252675
2. CVD Fall	1	Men	2013	44	0.987966921	0.00291653	0	0	0.005642459	0.000203461	0.003270629	0.9588858	0	0.034610721	0.002203196	0.004300282	0.975483857	0.009626967	0.005353451	0.009535726	0	0.989458504	0	0.001092309	0.009449187	0.077160349	0.902929328	0.005017692	0.014892631	0	0.967396854	0.008913002	0.023690144	0	0.971638054	0.002056832	0.026305115	0.078773884	0.006157762	0	0	0.901821824	0.00103115	0.01221538
2. CVD Fall	1	Men	2013	45	0.985864045	0.00331831	0	0	0.00597864	0.000341346	0.004497659	0.967315907	0	0.023075936	0.003694926	0.00591323	0.97189123	0.006027691	0.00897291	0.013108169	0	0.98517846	0	0.001832262	0.012989278	0.060398332	0.910725754	0.008410667	0.020465247	0	0.952533651	0.014929239	0.03253711	0	0.960427607	0.003449555	0.036122838	0.066748909	0.00718318	0	0	0.907549258	0.001729691	0.016788962
2. CVD Fall	1	Men	2013	46	0.984670797	0.003544187	0	0	0.007069635	0.000327189	0.004388193	0.970208377	0	0.020482438	0.003540267	0.005768918	0.944218846	0.034405353	0.008591958	0.012783844	0	0.985576077	0	0.001755956	0.012667967	0.064604032	0.907390008	0.008054122	0.019951839	0	0.954012187	0.014285338	0.031702475	0	0.961504572	0.003305262	0.035190166	0.064530304	0.006268792	0	0	0.911172557	0.001657677	0.016370671
2. CVD Fall	1	Men	2013	47	0.985991896	0.0033098	0	0	0.006103237	0.000313621	0.004281445	0.973657167	0	0.017322642	0.003392021	0.00562817	0.964118787	0.015187239	0.008226666	0.012467308	0	0.985962798	0	0.001682825	0.012354377	0.073689086	0.899148242	0.007712246	0.019450426	0	0.955445807	0.013667677	0.030886515	0	0.962554938	0.003166956	0.034278106	0.077798879	0.008076582	0	0	0.896573591	0.00158866	0.015962287
2. CVD Fall	1	Men	2013	48	0.985463341	0.003407121	0	0	0.006651564	0.000300621	0.004177354	0.965259703	0	0.025999468	0.003249924	0.005490905	0.952172522	0.027792721	0.007876383	0.012158374	0	0.986338941	0	0.001612738	0.012048321	0.077686944	0.895967922	0.00738443	0.018960704	0	0.956836112	0.013075165	0.030088723	0	0.963579522	0.003034388	0.033386089	0.081800353	0.008029191	0	0	0.893084375	0.001522516	0.015563566
2. CVD Fall	1	Men	2013	49	0.984466205	0.00405215	0	0	0.007117621	0.000288163	0.004075861	0.966728676	0	0.024800559	0.003113721	0.005357043	0.947711265	0.03289139	0.007540487	0.011856858	0	0.986704813	0	0.00154557	0.011749618	0.064940978	0.909506556	0.007070091	0.018482375	0	0.958184641	0.012506756	0.029308604	0	0.964579117	0.002907323	0.03251356	0.08448648	0.006974993	0	0	0.891905133	0.001459127	0.015174266
2. CVD Fall	1	Men	2013	50	0.973017277	0.004321505	3.71E-05	0.008473313	0.00783585	0.000460756	0.005854206	0.946903041	0.021264385	0.019162859	0.004976036	0.007693678	0.937054623	0.033884163	0.012040521	0.017020692	0.005348294	0.961167776	0.014146358	0.002470695	0.016866876	0.067011028	0.89517939	0.01129039	0.026519191	0.074899961	0.863127256	0.019952138	0.042020645	0.076981159	0.871767417	0.00464637	0.046605054	0.076301482	0.007711197	0.000151448	0.019110257	0.872615338	0.002332549	0.021777729
2. CVD Fall	1	Men	2013	51	0.976578781	0.004952458	2.12E-05	0.004239427	0.008054266	0.000441678	0.005712199	0.958699142	0.005422033	0.023605204	0.004767308	0.007506313	0.967547035	0.004329777	0.011525281	0.016597907	0.00642022	0.963437575	0.011326359	0.002367799	0.016448047	0.074482182	0.88886221	0.010808262	0.025847346	0.03464342	0.9053549	0.019079487	0.040922193	0.120260775	0.829911913	0.004451653	0.045375659	0.077642058	0.007806201	5.81E-06	0.000737908	0.890341195	0.002235445	0.021231383
2. CVD Fall	1	Men	2013	52	0.98068523	0.004400358	4.24E-06	0.000957995	0.007955008	0.000423399	0.005573771	0.949630252	0.013272054	0.02520682	0.004567243	0.007323631	0.940857366	0.031926181	0.011031175	0.016185278	0.005503655	0.965705443	0.010482422	0.002269195	0.016039285	0.06051893	0.903944106	0.010345934	0.02519103	0.076278936	0.865631129	0.018242247	0.039847687	0.095224008	0.856338338	0.004265024	0.04417263	0.084015622	0.009816489	6.51E-05	0.00652289	0.876739599	0.002142392	0.020697908
2. CVD Fall	1	Men	2013	53	0.976380815	0.005395986	1.64E-05	0.003020627	0.009341404	0.000405886	0.005438844	0.957066737	0.006615489	0.024796757	0.004375486	0.00714553	0.953971827	0.019688277	0.01055733	0.015782566	0.006440698	0.966033574	0.009710668	0.002174705	0.015640354	0.082090888	0.883456673	0.009902586	0.024549854	0.066870504	0.876894065	0.017438957	0.038796474	0.084208572	0.868710041	0.004086149	0.042995239	0.085350369	0.010834584	0.000138826	0.012512324	0.868933684	0.002053223	0.02017699
2. CVD Fall	1	Men	2013	54	0.976923453	0.005639437	1.28E-05	0.002259403	0.009468411	0.000389108	0.005307345	0.96452825	0.001622703	0.022685441	0.004191694	0.006971912	0.943319378	0.031188174	0.010102909	0.015389539	0.008085468	0.960471364	0.014107981	0.002084162	0.015251025	0.085810581	0.880788548	0.009477435	0.023923437	0.061302697	0.884261162	0.016668216	0.037767924	0.076193998	0.878048514	0.00391471	0.041842778	0.080562549	0.009999442	0	0	0.887801906	0.00196778	0.019668324
2. CVD Fall	1	Men	2013	55	0.967198193	0.005839807	4.73E-05	0.007993708	0.010038185	0.000607035	0.008275733	0.953119645	0.001377469	0.028098592	0.006534439	0.010869855	0.918066214	0.042224911	0.015731165	0.023977711	0.007563839	0.952997402	0.01242625	0.00325035	0.023762158	0.07607517	0.871916989	0.014759056	0.037248785	0.067861084	0.847478108	0.02592055	0.058740258	0.083617192	0.845222939	0.006102979	0.065056889	0.089982959	0.011709803	0	0	0.864604425	0.003068917	0.030633896
2. CVD Fall	1	Men	2013	56	0.96665293	0.006058402	4.19E-05	0.00682195	0.011766633	0.000581979	0.008076234	0.956254078	0.00378847	0.02309143	0.006259708	0.010606315	0.919078227	0.042491128	0.015051053	0.023379592	0.008264467	0.951189456	0.01426131	0.003115077	0.02316969	0.07343876	0.87614514	0.014122826	0.036293274	0.109257196	0.808810684	0.024765837	0.057166283	0.084602527	0.846258915	0.005846729	0.063291828	0.08866456	0.010884956	0.00039146	0.034323483	0.832935405	0.002941267	0.029858868
2. CVD Fall	1	Men	2013	57	0.963339963	0.005837541	6.19E-05	0.010433094	0.011887621	0.000557979	0.007881887	0.949987651	0.010752967	0.02291347	0.00599641	0.010349502	0.924781327	0.038023954	0.014398807	0.022795912	0.006946243	0.948264725	0.019212025	0.002985471	0.022591536	0.05769838	0.893429276	0.013512702	0.035359642	0.072387231	0.848329238	0.023657847	0.055625684	0.07822986	0.854605551	0.005601152	0.061563438	0.074915373	0.012147582	0.000314869	0.024950522	0.855750637	0.002818966	0.029102051
2. CVD Fall	1	Men	2013	58	0.962758498	0.00614042	6.08E-05	0.009744114	0.013068581	0.000534993	0.007692593	0.932301193	0.024507599	0.027347847	0.005744078	0.010099284	0.90098389	0.063016479	0.013773284	0.022226347	0.010162813	0.946645217	0.018303292	0.002861301	0.022027378	0.067510983	0.885114047	0.012927612	0.034447357	0.064807978	0.858479757	0.02259468	0.054117584	0.099134665	0.835628781	0.005365812	0.059870742	0.093217965	0.013470887	6.00E-06	0.000439107	0.861801227	0.002701798	0.028363018
2. CVD Fall	1	Men	2013	59	0.962913523	0.006562687	5.94E-05	0.008908935	0.013534233	0.000512978	0.007508255	0.937750022	0.017359253	0.029532929	0.005502266	0.009855531	0.929748715	0.035407303	0.013173393	0.021670588	0.009370952	0.950952971	0.015456823	0.002742347	0.021476908	0.065073151	0.889004405	0.012366536	0.033555908	0.045577379	0.880206959	0.021574523	0.052641139	0.075884585	0.860762316	0.005140293	0.058212806	0.085994121	0.011578954	4.27E-05	0.003628272	0.868525076	0.002589553	0.027641361
2. CVD Fall	1	Men	2013	60	0.965733045	0.006431266	1.76E-05	0.002704505	0.012548216	0.000768296	0.011797118	0.928399866	0.019278268	0.028607492	0.008232116	0.015482258	0.896076434	0.050236284	0.019677077	0.034010205	0.006971691	0.934764452	0.020451771	0.004105319	0.033706768	0.076605461	0.852306902	0.018475036	0.052612602	0.052715031	0.832707175	0.032168528	0.082409267	0.08668201	0.814536171	0.007691149	0.091090671	0.095544039	0.012141188	0.000222324	0.017759914	0.827095946	0.003876712	0.043359877
2. CVD Fall	1	Men	2013	61	0.957478184	0.006912783	5.91E-05	0.008418946	0.014878289	0.000736767	0.011515923	0.94428449	0.002776014	0.029944048	0.007885317	0.015110131	0.910579518	0.037446494	0.018815356	0.033158632	0.009063938	0.933460877	0.020676996	0.003934844	0.032863346	0.064020549	0.867067898	0.017669182	0.051242371	0.060817321	0.828350474	0.030701498	0.080130708	0.094669331	0.809433365	0.007367746	0.088529558	0.085277626	0.012056626	0	0	0.856697604	0.003715859	0.042252286
2. CVD Fall	1	Men	2013	62	0.95794324	0.006636547	4.94E-05	0.007342713	0.016079201	0.00070658	0.011242295	0.937856478	0.00851766	0.031324973	0.007553034	0.014747855	0.886809292	0.062873809	0.017988994	0.032327905	0.009603712	0.930450062	0.02413406	0.00377157	0.032040595	0.07430441	0.858895743	0.016896453	0.049903395	0.044478914	0.848327801	0.029293898	0.077899386	0.094383706	0.812538099	0.007057896	0.0860203	0.088790747	0.015084982	0.00023683	0.015220247	0.835934553	0.003561804	0.041170836
2. CVD Fall	1	Men	2013	63	0.953866893	0.007739725	7.38E-05	0.009377628	0.017288108	0.000677684	0.010976112	0.931870832	0.013025972	0.033473247	0.007234685	0.014395264	0.908512436	0.042773388	0.01719657	0.031517606	0.009782429	0.929233705	0.026130553	0.00361521	0.031238103	0.068520482	0.866729027	0.016155514	0.048594978	0.042567388	0.853775042	0.027943385	0.075714185	0.077265333	0.832411934	0.006761054	0.083561679	0.088004627	0.014852299	0.000248814	0.016227708	0.837137304	0.003414277	0.04011497
2. CVD Fall	1	Men	2013	64	0.955935635	0.007711632	6.68E-05	0.008517529	0.016401147	0.000650025	0.01071726	0.921296577	0.018849073	0.038872438	0.006929711	0.014052202	0.899361486	0.05347445	0.016436727	0.030727337	0.010269599	0.934056418	0.02175302	0.003465489	0.030455475	0.068741393	0.868497057	0.015445094	0.047316456	0.085564864	0.814213357	0.026647722	0.073574057	0.093854389	0.818516354	0.0064767	0.081152557	0.100037721	0.015424123	0.000237453	0.014924027	0.827019501	0.003273018	0.039084158
2. CVD Fall	1	Men	2013	65	0.949068046	0.007941169	7.15E-05	0.008856455	0.017071523	0.00095417	0.0160371	0.920394635	0.013166266	0.035260556	0.010156853	0.021021689	0.862988881	0.067069986	0.024036706	0.045904427	0.009934551	0.916456111	0.023026482	0.005083558	0.045499298	0.070129421	0.836687226	0.022591899	0.070591454	0.067465214	0.784130354	0.0388745	0.109529933	0.08367636	0.786092355	0.009493903	0.120737383	0.093642148	0.015242255	0.000394667	0.024844773	0.802725741	0.004801442	0.058348974
2. CVD Fall	1	Men	2013	66	0.945361486	0.008076058	8.21E-05	0.009976345	0.019926195	0.000915419	0.01566244	0.919463963	0.014815079	0.035467706	0.009728711	0.020524543	0.866097695	0.066181319	0.022967849	0.044753137	0.011122548	0.907613231	0.032031409	0.004873586	0.044359226	0.078080879	0.831605317	0.021592721	0.068721083	0.065420662	0.791144985	0.037050129	0.106384223	0.079282127	0.794430393	0.009094758	0.117192722	0.099190003	0.015286026	0	0	0.824076715	0.004603349	0.056843906
2. CVD Fall	1	Men	2013	67	0.943239748	0.009157198	0.000102205	0.010935755	0.020388177	0.000878351	0.015298565	0.922797876	0.011269087	0.036572959	0.009318703	0.020041376	0.882769073	0.051656851	0.021943173	0.043630903	0.011410853	0.908332078	0.032336471	0.004672622	0.043247976	0.065107949	0.847363339	0.02063492	0.066893792	0.053048239	0.808347967	0.035300394	0.1033034	0.086469979	0.791098023	0.008712546	0.113719452	0.093854444	0.01533182	0.000322789	0.020296618	0.810405528	0.004413761	0.05537504
2. CVD Fall	1	Men	2013	68	0.941048818	0.009153755	0.000108671	0.01162378	0.022276721	0.000842901	0.014945354	0.909048125	0.021799852	0.040653887	0.008926121	0.019572015	0.872602591	0.063899199	0.020960961	0.042537249	0.012775918	0.907117899	0.033460792	0.004480317	0.042165074	0.067539518	0.847634818	0.019716884	0.06510878	0.064309814	0.801781396	0.033622494	0.100286295	0.081463732	0.799873303	0.008346605	0.11031636	0.093825743	0.015581918	0.000276036	0.017130731	0.815011492	0.00423235	0.05394173
2. CVD Fall	1	Men	2013	69	0.941782332	0.008639426	0.000112772	0.012772238	0.021281529	0.000809008	0.014602695	0.911531683	0.016632721	0.044169003	0.00855029	0.019116303	0.869381276	0.069127419	0.020019576	0.041471729	0.012767505	0.903878448	0.037947626	0.00429634	0.041110081	0.079321016	0.838476602	0.018837078	0.063365304	0.061737763	0.808916606	0.032013772	0.09733186	0.054378197	0.830643124	0.007996307	0.106982373	0.105819145	0.017795046	0	0	0.81978363	0.004058801	0.05254338
2. CVD Fall	1	Men	2013	70	0.927063612	0.009479341	0.000137742	0.014184863	0.024070652	0.00135663	0.023707161	0.893432993	0.017968279	0.043268258	0.014307723	0.031022747	0.823238714	0.076194154	0.033395403	0.067171729	0.014746229	0.871926033	0.039541998	0.007197687	0.066588054	0.069114063	0.797014557	0.031432951	0.10243843	0.038183389	0.751697947	0.053229601	0.156889062	0.084444811	0.729871115	0.013382733	0.172301342	0.096731028	0.017183255	0.000312195	0.017532145	0.776418282	0.006800178	0.085022917
2. CVD Fall	1	Men	2013	71	0.922455037	0.009936385	0.000172682	0.016909251	0.026051556	0.001302562	0.023172526	0.894199532	0.022603825	0.039179859	0.013706409	0.030310375	0.841309566	0.06131178	0.031885548	0.065493105	0.010214482	0.880262958	0.037692604	0.006903764	0.064926191	0.068416113	0.801885076	0.030022081	0.099676731	0.047543495	0.749623676	0.050648081	0.152184748	0.071093934	0.749095769	0.012822365	0.166987932	0.091838396	0.018538268	0	0	0.800287052	0.006522941	0.082813343
2. CVD Fall	1	Men	2013	72	0.923328341	0.010595836	0.000177751	0.016321042	0.025671086	0.001250923	0.022655021	0.891516057	0.022459756	0.043272967	0.013131144	0.029620076	0.846311828	0.059389577	0.030439242	0.063859354	0.014453091	0.873902257	0.041712996	0.006622807	0.063308849	0.0651247	0.809223688	0.028670696	0.096980915	0.062422423	0.741822188	0.048174842	0.147580546	0.067503389	0.75842482	0.012286325	0.161785465	0.108793129	0.020281907	0	0	0.784007701	0.006257948	0.080659314
2. CVD Fall	1	Men	2013	73	0.914772027	0.01093257	0.000249614	0.022072827	0.028616774	0.001201625	0.022154564	0.884401916	0.031781517	0.042283894	0.012580959	0.028951713	0.828102625	0.080573259	0.029054143	0.062269972	0.013700178	0.874068879	0.044141074	0.00635434	0.061735528	0.071378192	0.806895065	0.027376597	0.094350146	0.055079124	0.756039207	0.045806124	0.143075545	0.076059375	0.755473756	0.011773708	0.15669316	0.098896602	0.021603092	0.000543987	0.024018479	0.770372948	0.00600475	0.078560142
2. CVD Fall	1	Men	2013	74	0.918171016	0.011579527	0.000197676	0.01658693	0.030639171	0.001154585	0.021671095	0.883034579	0.031416232	0.045189076	0.012054934	0.028305178	0.851429296	0.060118156	0.027728032	0.060724516	0.018173915	0.876871857	0.038650523	0.006097911	0.060205794	0.074732975	0.807345642	0.026137697	0.091783687	0.059094016	0.758698576	0.043538359	0.138669049	0.074783921	0.762221934	0.011283655	0.151710489	0.100149442	0.019731829	0.001585249	0.072779948	0.723475395	0.005762921	0.076515216
2. CVD Fall	1	Men	2013	75	0.89215307	0.011631414	0.000297487	0.024640879	0.034130325	0.001926719	0.035220106	0.871814277	0.01913697	0.043015494	0.020057044	0.045976215	0.772688485	0.083006703	0.045938049	0.098366764	0.018111111	0.821088167	0.053107782	0.010162202	0.097530737	0.065210759	0.743174693	0.043321953	0.148292594	0.03781524	0.667192485	0.07182386	0.223168415	0.072001092	0.665329546	0.018777728	0.243891634	0.107110136	0.022136695	0.000367542	0.015964592	0.721034337	0.009604816	0.123781881
2. CVD Fall	1	Men	2013	76	0.897067485	0.01365661	0.000276784	0.019588016	0.033085201	0.001852492	0.034473411	0.849251153	0.037666422	0.048884715	0.019223165	0.044974544	0.791782137	0.06844427	0.043829662	0.095943931	0.017981623	0.826108808	0.05102006	0.009756598	0.09513291	0.062292596	0.752114477	0.041352481	0.144240446	0.05168485	0.663920817	0.068219792	0.216174542	0.080502945	0.665517172	0.018001067	0.235978816	0.102909089	0.025690017	7.33E-05	0.002770015	0.738772241	0.00922236	0.120563026
2. CVD Fall	1	Men	2013	77	0.885623792	0.013479631	0.000376789	0.026815611	0.038167452	0.001781802	0.033754923	0.845335165	0.043361631	0.048867367	0.018426905	0.044008931	0.78800774	0.076586552	0.041813251	0.093592457	0.013552891	0.828960276	0.055311152	0.009369782	0.092805898	0.076006516	0.744231972	0.039469034	0.140292478	0.059908027	0.665974769	0.064774284	0.20934292	0.074995386	0.679497126	0.017259548	0.22824794	0.1004845	0.024974075	0	0	0.748251746	0.00885765	0.117432029
2. CVD Fall	1	Men	2013	78	0.891702519	0.013222635	0.000333195	0.024246291	0.035716094	0.001714535	0.03306473	0.864394905	0.024319422	0.050539281	0.017666969	0.043079423	0.79095792	0.077844382	0.039885689	0.091312009	0.019489492	0.816288327	0.064671681	0.009001123	0.090549378	0.066846439	0.759036736	0.037668674	0.136448152	0.062731836	0.673112069	0.061482322	0.202673773	0.073479692	0.689268613	0.016551963	0.220699732	0.113912735	0.028570277	0	0	0.734618491	0.008510092	0.114388406
2. CVD Fall	1	Men	2013	79	0.881374276	0.014463608	0.000443897	0.029332866	0.040331793	0.001650585	0.032402975	0.847422601	0.042994632	0.050454508	0.016942133	0.042186127	0.781294741	0.091558896	0.038044008	0.089102355	0.019883094	0.828861727	0.054242033	0.008650029	0.088363118	0.075666332	0.755677965	0.035948611	0.132707092	0.063066834	0.682426389	0.058339137	0.196167639	0.048242027	0.722545524	0.015877171	0.213335277	0.107333126	0.025495842	0.002016517	0.071278431	0.674265158	0.008179128	0.111431797
2. CVD Fall	1	Men	2013	80	0.851295049	0.016971033	0.000637239	0.035552527	0.036847104	0.002921781	0.055775266	0.806581758	0.044326133	0.046668398	0.029865998	0.072557714	0.691316445	0.089326225	0.066684133	0.152673197	0.020580319	0.76166164	0.051059733	0.015282768	0.15141554	0.075341314	0.635017678	0.063046831	0.226594177	0.046391503	0.518647971	0.101702416	0.33325811	0.063631099	0.546443946	0.027996726	0.36192823	0.112015386	0.033323095	0	0	0.64961708	0.014452633	0.190591806
2. CVD Fall	1	Men	2013	81	0.8471829	0.018295418	0.000688228	0.035565525	0.040737584	0.002815912	0.054714432	0.792420912	0.050012152	0.057792721	0.028656653	0.071117561	0.69380146	0.093556649	0.063599968	0.149041923	0.02673663	0.740660424	0.070080366	0.014699083	0.147823498	0.080172	0.639273354	0.060166562	0.220388084	0.047395271	0.533743433	0.096448152	0.322413144	0.060936075	0.562540338	0.026871309	0.349652278	0.10516946	0.026616759	0.00072647	0.02584208	0.64203701	0.013902549	0.185705672
2. CVD Fall	1	Men	2013	82	0.834204452	0.01634655	0.000723602	0.041666274	0.050638689	0.002715629	0.053704804	0.810939187	0.036431678	0.055381195	0.027505773	0.069742167	0.705038319	0.088768092	0.060658899	0.145534689	0.0219164	0.744148895	0.075435337	0.014144783	0.144354585	0.070521739	0.657695306	0.057420016	0.214362939	0.043138985	0.553557546	0.091443368	0.311860101	0.055814293	0.580677392	0.025800536	0.337707779	0.114635557	0.034687334	0.001426425	0.03807169	0.616827075	0.013380236	0.180971681
2. CVD Fall	1	Men	2013	83	0.846771061	0.018815745	0.0006355	0.032035907	0.046374009	0.002620786	0.052746993	0.781996982	0.060778678	0.062380638	0.026411567	0.068432135	0.687375361	0.112616421	0.057856499	0.142151719	0.025879758	0.740827691	0.078664499	0.013619024	0.141009028	0.074068978	0.662608872	0.054803038	0.208519112	0.052507318	0.55921026	0.086680743	0.301601678	0.066769666	0.582349105	0.024782744	0.326098484	0.120488283	0.028104539	0.004641447	0.137099488	0.520391334	0.0128849	0.17639001
2. CVD Fall	1	Men	2013	84	0.844111462	0.021791897	0.000529655	0.023198748	0.055995284	0.00253125	0.051841704	0.788927972	0.061137004	0.057374504	0.025372349	0.067188171	0.698445811	0.107472267	0.055188553	0.138893369	0.025381052	0.726034145	0.097676596	0.013121018	0.13778719	0.077798364	0.667032787	0.052311674	0.202857175	0.046874257	0.579331677	0.082153222	0.291640844	0.061594706	0.599760538	0.023816366	0.31482839	0.108900862	0.030746798	0.003621319	0.101747244	0.570606976	0.012415801	0.171961001
2. CVD Fall	1	Men	2013	85	0.83432115	0.025512504	0.000576253	0.021511917	0.052770351	0.00307446	0.062233365	0.775769893	0.070015113	0.043006985	0.030640979	0.08056703	0.664318674	0.103830535	0.066154533	0.165696257	0.027044417	0.704205793	0.088465765	0.015894404	0.164389622	0.080453091	0.615894803	0.0627509	0.240901206	0.045118937	0.512900093	0.097821304	0.344159666	0.077787153	0.522525479	0.028773106	0.370914261	0.121497121	0.035708395	0.006995171	0.156812488	0.459283042	0.015042791	0.204660992
2. CVD Fall	1	Men	2013	86	0.763655185	0.028816658	0.00274257	0.084159756	0.056391268	0.002974854	0.061259708	0.733443172	0.097439259	0.060436917	0.029467538	0.079213113	0.654422354	0.120426873	0.063125281	0.162025492	0.039222839	0.685947732	0.098732486	0.015335717	0.160761227	0.096424255	0.609215804	0.059922254	0.234437687	0.036861115	0.537700469	0.092697905	0.332740511	0.068234144	0.546081019	0.027682633	0.358002204	0.109044052	0.050542004	0.003810094	0.066290125	0.556167009	0.014516781	0.199629935
2. CVD Fall	1	Men	2013	87	0.772086915	0.021988481	0.001936896	0.079018812	0.061733963	0.002881505	0.060353427	0.753785772	0.081659878	0.058253663	0.028357542	0.077943144	0.667309345	0.113931267	0.060250458	0.15850893	0.021007122	0.701904386	0.104993213	0.014809335	0.157285945	0.078921183	0.635641566	0.057237865	0.228199386	0.034910442	0.555548319	0.087844845	0.321696395	0.052473616	0.575355611	0.02665153	0.345519243	0.113377276	0.022854978	0.019343558	0.439050491	0.196564971	0.014021332	0.194787394
2. CVD Fall	1	Men	2013	88	0.787665101	0.025162605	0.001938227	0.069580858	0.053343067	0.002794305	0.059515838	0.767685599	0.057758352	0.070488274	0.027309324	0.07675845	0.648508194	0.138818735	0.057525612	0.155147458	0.029436474	0.673021854	0.129262476	0.014314531	0.153964665	0.060789139	0.662329686	0.054693582	0.222187593	0.050202104	0.555512584	0.083254129	0.311031183	0.068734394	0.572117275	0.025678259	0.333470072	0.107641186	0.039332163	0.011114043	0.209200707	0.429021834	0.013555765	0.190134301
2. CVD Fall	1	Men	2013	89	0.803157223	0.023150575	0.001183817	0.047464069	0.063582793	0.002713161	0.058748362	0.718811176	0.106065882	0.073141169	0.026321315	0.075660457	0.663186649	0.129924905	0.054946442	0.151942004	0.030843885	0.696919733	0.107587423	0.013850639	0.150798321	0.068096165	0.66321482	0.052285401	0.216403614	0.051892325	0.568441308	0.078917877	0.30074849	0.066340555	0.587039108	0.024761373	0.321858965	0.122278356	0.037837885	0.006971547	0.148610587	0.485510548	0.013119459	0.185671618
2. CVD Fall	1	Men	2013	90	0.690959989	0.027142968	0.002390749	0.078559057	0.076778299	0.005230196	0.118938742	0.63661658	0.082225148	0.077869773	0.050343246	0.152945253	0.446129254	0.144709886	0.104105966	0.305054894	0.042643052	0.52188491	0.106081249	0.026601168	0.302789621	0.065891004	0.402968802	0.099150698	0.431989497	0.051031631	0.204710562	0.148357502	0.595900306	0.070304494	0.245766607	0.047384114	0.636544785	0.129625176	0.034588044	0.019077773	0.336414306	0.083436483	0.025203013	0.371655207
2. CVD Fall	1	Men	2013	91	0.702166483	0.027548516	0.002088165	0.068370641	0.0770701	0.005092903	0.117663192	0.617179179	0.122031194	0.061114747	0.04861447	0.15106041	0.490251339	0.111070685	0.099545433	0.299132543	0.033692273	0.493961627	0.149602612	0.025800494	0.296942994	0.077597882	0.406428881	0.094892983	0.421080255	0.048763332	0.23409451	0.140722941	0.576419217	0.055330808	0.284315265	0.045781902	0.614572024	0.147540297	0.051425406	0.006258374	0.102236144	0.304791088	0.024450746	0.363297946
2. CVD Fall	1	Men	2013	92	0.658878522	0.031070732	0.004051104	0.11129322	0.073197944	0.004967246	0.116541231	0.597312028	0.132119696	0.074208609	0.046996715	0.149362951	0.488883571	0.122331584	0.095249483	0.293535363	0.045314496	0.499464489	0.138743851	0.025057805	0.291419358	0.06404084	0.434431784	0.090882646	0.410644731	0.049639816	0.259075272	0.133546638	0.557738274	0.05303216	0.3091693	0.044283834	0.593514706	0.128674167	0.057190093	0	0	0.435046155	0.023753439	0.355336145
2. CVD Fall	1	Men	2013	93	0.683755791	0.040232117	0.003941378	0.085283566	0.066357468	0.004853163	0.115576517	0.619762846	0.113706506	0.073186824	0.045487472	0.147856352	0.449251388	0.17127343	0.091210334	0.288264848	0.046015702	0.51720534	0.126186524	0.024372205	0.286220229	0.070555599	0.44164746	0.087112508	0.400684433	0.046021256	0.287305383	0.126813192	0.539860169	0.068128983	0.31560831	0.042887627	0.57337508	0.13317999	0.054751561	0.009493808	0.138280396	0.293412935	0.023110275	0.347771035
2. CVD Fall	1	Men	2013	94	0.651042305	0.04081093	0.004300219	0.091024756	0.093298328	0.004750621	0.114772841	0.557347126	0.174035815	0.077988582	0.04408434	0.146544137	0.517463019	0.111794525	0.087420284	0.283322172	0.052095611	0.497209346	0.145605355	0.023742887	0.281346801	0.060772317	0.464451971	0.083575481	0.391200231	0.037444932	0.319262115	0.120507142	0.522785812	0.05735881	0.346896967	0.041591109	0.554153115	0.121125498	0.042264438	0.005301625	0.106156509	0.362028028	0.022520521	0.340603382
2. CVD Fall	1	Men	2013	95	0.665974831	0.038561154	0.003800687	0.085918896	0.086950719	0.004659616	0.114134097	0.645656516	0.094277822	0.071850821	0.04278501	0.145429831	0.486384344	0.151035895	0.083871674	0.278708087	0.065999703	0.46270684	0.171324467	0.023169133	0.276799858	0.060490585	0.477052677	0.080264524	0.382192214	0.04680292	0.332070015	0.114612935	0.50651413	0.039927558	0.38383394	0.040392196	0.535846306	0.126361721	0.054996737	0.018294745	0.231321506	0.213208386	0.021983531	0.333833374
2. CVD Fall	1	Men	2013	96	0.610458539	0.040418902	0.005960551	0.122556515	0.102361065	0.004580179	0.11366425	0.541749967	0.191071698	0.081074185	0.041587242	0.144516908	0.456272876	0.188747449	0.080556848	0.274422826	0.065407235	0.469045893	0.170316904	0.022650299	0.272579668	0.060924956	0.488242865	0.077172614	0.373659565	0.026823143	0.373020035	0.109114918	0.491041904	0.057822122	0.384439478	0.039288876	0.518449524	0.112761788	0.050245649	0.034987826	0.375506125	0.077539372	0.021498735	0.327460506
2. CVD Fall	1	Men	2013	97	0.60674813	0.039460568	0.005736457	0.121184663	0.108990521	0.004512369	0.113367292	0.500627149	0.228478585	0.086596684	0.040488848	0.143808734	0.492507234	0.159558626	0.077468131	0.270466009	0.075412257	0.49517375	0.138542289	0.022185812	0.268685892	0.070863052	0.489243803	0.074292715	0.365600429	0.026676097	0.392962933	0.103997327	0.476363643	0.04975828	0.410007619	0.038279194	0.501954907	0.126341756	0.091345262	0.006702961	0.061660956	0.371399963	0.021065632	0.321483469
2. CVD Fall	1	Men	2013	98	0.527558645	0.037685286	0.008925297	0.182561193	0.125566098	0.004456279	0.113247202	0.468077571	0.277136547	0.071989712	0.03948767	0.1433085	0.548214251	0.11035141	0.074597797	0.266836542	0.063943458	0.503066357	0.146097543	0.021775159	0.265117483	0.066366302	0.504004132	0.071617752	0.358011814	0.049244372	0.389039837	0.099244298	0.462471492	0.041859251	0.434427713	0.037361229	0.486351807	0.134427551	0.056819018	0.027587756	0.299255155	0.145326685	0.020683784	0.315900052
2. CVD Fall	1	Men	2013	99	0.609066422	0.039705992	0.004913202	0.105200882	0.123393579	0.004412034	0.11330789	0.481082693	0.23928032	0.098036264	0.038581565	0.143019157	0.487621875	0.176907543	0.07193805	0.263532532	0.066657257	0.521453423	0.128598837	0.021417881	0.261872602	0.074338979	0.505630946	0.069140584	0.35088949	0.050409877	0.405395044	0.094839885	0.449355194	0.072049848	0.419790289	0.036533076	0.471626787	0.116943665	0.082003552	0.00305393	0.03285038	0.434088618	0.020352806	0.310707048
2. CVD Fall	1	Men	2013	100	0.43093319	0.039557338	0.015456516	0.265500278	0.130619746	0.00437979	0.113553142	0.488652561	0.229190216	0.101445508	0.037768379	0.142943335	0.496420774	0.173547013	0.069481012	0.260551201	0.081696095	0.461500248	0.176741571	0.021113558	0.258948528	0.06081095	0.528107131	0.066853996	0.344227922	0.038230262	0.433999569	0.090768085	0.437002085	0.059306589	0.447136915	0.035792829	0.457763668	0.117939883	0.071420506	0.008268933	0.095495542	0.380902603	0.020072355	0.305900178
2. CVD Fall	1	Men	2014	35	0.992058985	0.001884655	0	0	0.003113834	0.000142021	0.002800504	0.981911578	0	0.012863246	0.001541548	0.003683628	0.968051489	0.020003687	0.003759852	0.008184972	0	0.991126317	0	0.000763264	0.008110419	0.040154371	0.943513212	0.003522626	0.012809791	0	0.973266309	0.006286569	0.020447122	0	0.975833714	0.001438887	0.022727398	0.067008055	0.003425482	0	0	0.918349983	0.000720476	0.010496003
2. CVD Fall	1	Men	2014	36	0.992613498	0.001591405	0	0	0.002926807	0.000136122	0.002732168	0.971285135	0	0.02364401	0.00147723	0.003593626	0.96597947	0.022435001	0.003601861	0.007983668	0	0.991357532	0	0.000731499	0.007910969	0.060724474	0.923408193	0.003374716	0.012492617	0	0.974044475	0.006020275	0.01993525	0	0.976464541	0.001378873	0.022156586	0.080636751	0.003911199	0	0	0.904524564	0.000690495	0.010236991
2. CVD Fall	1	Men	2014	37	0.991460356	0.002560085	0	0	0.003183582	0.000130469	0.002665508	0.975054925	0	0.020023671	0.00141558	0.003505824	0.984264627	0.004497761	0.003450393	0.007787219	0	0.991582615	0	0.000701053	0.007716332	0.094389678	0.890194416	0.003232915	0.012182991	0	0.97479979	0.005764919	0.019435291	0	0.977079681	0.001321348	0.021598971	0.072223124	0.003066579	0	0	0.914064354	0.00066176	0.009984183
2. CVD Fall	1	Men	2014	38	0.991529616	0.002606124	0	0	0.003138726	0.000125051	0.002600483	0.96888313	0	0.026340212	0.001356487	0.003420171	0.953785431	0.035313887	0.003305175	0.007595507	0	0.991801739	0	0.000671872	0.007526389	0.09135525	0.893667061	0.003096968	0.011880721	0	0.975533025	0.005520045	0.01894693	0	0.977679588	0.001266209	0.021054203	0.07896948	0.005212073	0	0	0.905446802	0.000634219	0.009737426
2. CVD Fall	1	Men	2014	39	0.990639648	0.002531156	0	0	0.004172284	0.000119858	0.002537055	0.982092126	0	0.013271415	0.001299844	0.003336615	0.966788064	0.022637573	0.003165948	0.007408415	0	0.992015072	0	0.000643903	0.007341025	0.079816579	0.905631168	0.002966633	0.01158562	0	0.976244923	0.005285216	0.018469862	0	0.978264705	0.001213358	0.020521937	0.06159259	0.005727579	0	0	0.922575439	0.000607822	0.009496569
2. CVD Fall	1	Men	2014	40	0.991206355	0.002196901	0	0	0.002755016	0.00023794	0.003603788	0.976830302	0	0.015850613	0.00257976	0.004739325	0.965726691	0.017471967	0.006280773	0.010520568	0	0.988296974	0	0.001278119	0.010424907	0.077374033	0.90029155	0.005885621	0.016448797	0	0.96330689	0.010480195	0.026212914	0	0.968469827	0.00240816	0.029122013	0.076017466	0.006605067	0	0	0.902686574	0.00120651	0.013484383
2. CVD Fall	1	Men	2014	41	0.98832326	0.002554272	0	0	0.00537848	0.000228062	0.003515925	0.97971255	0	0.013191919	0.002471972	0.004623559	0.968457623	0.015265552	0.006015695	0.01026113	0	0.988607226	0	0.001224906	0.010167868	0.095910557	0.882412728	0.005637485	0.016039231	0	0.964417234	0.010032862	0.025549904	0	0.969310405	0.002307588	0.028382006	0.080338773	0.004004738	0	0	0.901349957	0.001156288	0.013150243
2. CVD Fall	1	Men	2014	42	0.989139066	0.002891213	0	0	0.004320899	0.000218595	0.003430226	0.974866167	0	0.018254546	0.002368653	0.004510634	0.945100521	0.039130007	0.005761537	0.010007934	0	0.988909079	0	0.001173905	0.009917016	0.065269534	0.913691556	0.005399579	0.015639331	0	0.965494107	0.009603836	0.024902057	0	0.97013004	0.002211189	0.027658772	0.070878336	0.005750922	0	0	0.909438523	0.001108155	0.012824065
2. CVD Fall	1	Men	2014	43	0.988328104	0.002594598	0	0	0.005521134	0.000209523	0.003346641	0.97534811	0	0.017981789	0.002269619	0.004400482	0.957911717	0.026809608	0.005517846	0.009760828	0	0.989202776	0	0.001125025	0.009672199	0.09816903	0.881410644	0.005171477	0.015248849	0	0.966538678	0.009192353	0.024268968	0	0.970929359	0.002118788	0.026951854	0.089442116	0.004847349	0	0	0.892142862	0.001062022	0.01250565
2. CVD Fall	1	Men	2014	44	0.988087648	0.002803944	0	0	0.005642459	0.000200829	0.00326512	0.958921549	0	0.034610721	0.002174691	0.004293039	0.975569183	0.009626967	0.005284186	0.009519664	0	0.989488552	0	0.001078177	0.009433271	0.077160349	0.903019333	0.004952771	0.014867546	0	0.967552076	0.008797683	0.023650241	0	0.971708973	0.00203022	0.026260807	0.078773884	0.005920056	0	0	0.902093447	0.001017809	0.012194804
2. CVD Fall	1	Men	2014	45	0.986002246	0.003179242	0	0	0.00597864	0.000338024	0.004501849	0.967346365	0	0.023075936	0.003658961	0.005918738	0.971966361	0.006027691	0.008885569	0.013120378	0	0.985184196	0	0.001814427	0.013001377	0.060398332	0.91078856	0.008328799	0.02048431	0	0.952648663	0.01478392	0.032567417	0	0.960427537	0.003415978	0.036156485	0.066748909	0.00688214	0	0	0.907851497	0.001712855	0.0168046
2. CVD Fall	1	Men	2014	46	0.984828299	0.003385782	0	0	0.007069635	0.000324004	0.00439228	0.970237464	0	0.020482438	0.003505806	0.005774292	0.944290571	0.034405353	0.008508325	0.012795751	0	0.98558137	0	0.001738863	0.012679767	0.064604032	0.907449821	0.007975724	0.019970423	0	0.954121708	0.014146287	0.031732005	0	0.961503967	0.003273089	0.035222944	0.064530304	0.005988612	0	0	0.911453623	0.001641541	0.016385919
2. CVD Fall	1	Men	2014	47	0.986145079	0.003155683	0	0	0.006103237	0.000310569	0.004285433	0.973684942	0	0.017322642	0.003359004	0.005633413	0.964187251	0.015187239	0.008146589	0.012478921	0	0.985967671	0	0.001666444	0.012365885	0.073689086	0.899205195	0.007637176	0.019468543	0	0.955550077	0.013534638	0.030915285	0	0.962553836	0.003136129	0.034310035	0.077798879	0.007700505	0	0	0.896950264	0.001573196	0.015977156
2. CVD Fall	1	Men	2014	48	0.985623414	0.003246082	0	0	0.006651564	0.000297695	0.004181245	0.965286223	0	0.025999468	0.00321829	0.005496019	0.952237864	0.027792721	0.007799716	0.012169699	0	0.986343417	0	0.00159704	0.012059544	0.077686944	0.89602214	0.007312551	0.018978365	0	0.956935357	0.012947893	0.03011675	0	0.963577961	0.003004852	0.033417187	0.081800353	0.007649688	0	0	0.8934642	0.001507696	0.015578062
2. CVD Fall	1	Men	2014	49	0.984655708	0.003861655	0	0	0.007117621	0.000285358	0.004079658	0.966753995	0	0.024800559	0.003083413	0.005362033	0.947773619	0.03289139	0.007467089	0.011867903	0	0.986708913	0	0.001530525	0.011760562	0.064940978	0.909558159	0.007001272	0.018499591	0	0.958279079	0.012385017	0.029335904	0	0.964577131	0.002879023	0.032543846	0.08448648	0.006647094	0	0	0.892233101	0.001444924	0.0151884
2. CVD Fall	1	Men	2014	50	0.97349908	0.0041232	3.44E-05	0.008246198	0.00783585	0.000452265	0.005808979	0.947628315	0.020690246	0.019162859	0.004884337	0.007634241	0.937407999	0.033884163	0.011818638	0.0168892	0.005101689	0.961590215	0.014146358	0.002425165	0.016736572	0.067011028	0.895592323	0.01108233	0.026314319	0.074899961	0.863819564	0.019584458	0.041696017	0.076981159	0.872213086	0.004560746	0.046245009	0.076301482	0.007359542	0.000140564	0.018601074	0.873698287	0.002289565	0.021609486
2. CVD Fall	1	Men	2014	51	0.976967649	0.004730896	1.97E-05	0.004125888	0.008054266	0.000433539	0.00566807	0.958991379	0.005275639	0.023605204	0.004679455	0.007448324	0.96788765	0.004329777	0.011312892	0.016469681	0.006132285	0.963896213	0.011326359	0.002324165	0.016320978	0.074482182	0.889261068	0.010609087	0.025647664	0.03464342	0.906022641	0.018727889	0.040606051	0.120260775	0.830344496	0.004369618	0.045025112	0.077642058	0.007456257	5.40E-06	0.000718238	0.890916436	0.00219425	0.021067361
2. CVD Fall	1	Men	2014	52	0.980953361	0.00420907	3.94E-06	0.000932309	0.007955008	0.000415597	0.005530711	0.950129341	0.012913709	0.02520682	0.004483078	0.007267053	0.941185688	0.031926181	0.010827892	0.016060239	0.005264269	0.966110557	0.010482422	0.002227378	0.015915374	0.06051893	0.904329373	0.010155278	0.024996418	0.076278936	0.86627514	0.017906078	0.039539846	0.095224008	0.856758188	0.004186427	0.043831377	0.084015622	0.009391194	6.06E-05	0.006349527	0.877542151	0.002102912	0.020538007
2. CVD Fall	1	Men	2014	53	0.976740038	0.005168262	1.53E-05	0.002939746	0.009341404	0.000398406	0.005396826	0.95738119	0.006436871	0.024796757	0.004294854	0.007090328	0.954288305	0.019688277	0.010362779	0.015660639	0.006168377	0.9664668	0.009710668	0.00213463	0.015519525	0.082090888	0.883828817	0.0097201	0.024360195	0.066870504	0.877515151	0.01711759	0.038496755	0.084208572	0.869117498	0.004010849	0.042663082	0.085350369	0.010380072	0.000129367	0.012180203	0.86992349	0.002015386	0.020021113
2. CVD Fall	1	Men	2014	54	0.977265798	0.005406615	1.20E-05	0.002198915	0.009468411	0.000381938	0.005266343	0.964703169	0.00157889	0.022685441	0.004114449	0.006918051	0.943624447	0.031188174	0.009916731	0.015270648	0.007751186	0.960961875	0.014107981	0.002045755	0.015133204	0.085810581	0.881148018	0.009302784	0.023738618	0.061302697	0.8848601	0.016361053	0.03747615	0.076193998	0.878443909	0.003842569	0.041519524	0.080562549	0.009586029	0	0	0.888403527	0.001931518	0.019516377
2. CVD Fall	1	Men	2014	55	0.967773201	0.005602808	4.42E-05	0.007779757	0.010038185	0.00059432	0.008167547	0.953435804	0.001340277	0.028098592	0.00639757	0.010727757	0.918709168	0.042224911	0.015401664	0.023664257	0.007255286	0.953684673	0.01242625	0.003182269	0.023451522	0.07607517	0.87271307	0.014449917	0.036761843	0.067861084	0.848788926	0.025377626	0.057972364	0.083617192	0.84620124	0.005975148	0.06420642	0.089982959	0.011232122	0	0	0.865546855	0.003004636	0.030233428
2. CVD Fall	1	Men	2014	56	0.96720172	0.005812703	3.91E-05	0.006639417	0.011766633	0.000569789	0.007970656	0.956626134	0.003686181	0.02309143	0.006128594	0.010467662	0.919699116	0.042491128	0.014735799	0.023073958	0.007927822	0.951894239	0.01426131	0.00304983	0.0228668	0.07343876	0.876915403	0.013827014	0.035818823	0.109257196	0.81007674	0.024247099	0.056418965	0.084602527	0.847208775	0.005724265	0.062464432	0.08866456	0.010451707	0.000365376	0.033412265	0.834757901	0.00287966	0.029468532
2. CVD Fall	1	Men	2014	57	0.963977326	0.005598267	5.78E-05	0.010153886	0.011887621	0.000546292	0.00777885	0.950538876	0.010462637	0.02291347	0.005870811	0.010214206	0.925380925	0.038023954	0.014097214	0.022497908	0.006659618	0.948909215	0.019212025	0.002922938	0.022296204	0.05769838	0.894174555	0.013229668	0.034897396	0.072387231	0.849551946	0.023162317	0.054898506	0.07822986	0.855527671	0.005483832	0.060758637	0.074915373	0.011654483	0.000293726	0.024289499	0.85736539	0.002759921	0.028721608
2. CVD Fall	1	Men	2014	58	0.963393929	0.005881491	5.67E-05	0.009483532	0.013068581	0.000523787	0.00759203	0.933215237	0.023845894	0.027347847	0.005623764	0.009967259	0.90156294	0.063016479	0.013484793	0.021935789	0.009731665	0.947424255	0.018303292	0.002801369	0.02173942	0.067510983	0.885835146	0.012656834	0.033997037	0.064807978	0.859660482	0.022121419	0.053410121	0.099134665	0.836523844	0.005253422	0.059088069	0.093217965	0.012899553	5.59E-06	0.000427499	0.862811951	0.002645207	0.027992237
2. CVD Fall	1	Men	2014	59	0.963552212	0.006275041	5.52E-05	0.00867094	0.013534233	0.000502233	0.007410102	0.938462809	0.016890553	0.029532929	0.005387017	0.009726693	0.930307934	0.035407303	0.012897467	0.021387295	0.008958028	0.951704096	0.015456823	0.002684906	0.021196146	0.065073151	0.889702097	0.01210751	0.033117242	0.045577379	0.881347015	0.021122629	0.051952977	0.075884585	0.861630982	0.005032626	0.057451807	0.085994121	0.011069837	3.97E-05	0.003532138	0.869548896	0.002535313	0.027280013
2. CVD Fall	1	Men	2014	60	0.966164212	0.006135924	1.63E-05	0.002632269	0.012548216	0.000756957	0.011746127	0.929108792	0.018757755	0.028607492	0.008110622	0.015415339	0.89651384	0.050236284	0.019386674	0.033863203	0.006651041	0.93529138	0.020451771	0.004044731	0.033561077	0.076605461	0.852806972	0.018202373	0.052385195	0.052715031	0.833538129	0.03169377	0.08205307	0.08668201	0.815043401	0.007577639	0.09069695	0.095544039	0.011588504	0.000206372	0.017290346	0.828378779	0.003819497	0.043172463
2. CVD Fall	1	Men	2014	61	0.958098244	0.00658228	5.47E-05	0.008194397	0.014878289	0.000725893	0.011466147	0.944541128	0.002701061	0.029944048	0.007768942	0.015044821	0.911000525	0.037446494	0.01853767	0.033015311	0.008628595	0.934096337	0.020676996	0.003876771	0.032721301	0.064020549	0.867550152	0.017408412	0.051020886	0.060817321	0.829149929	0.030248391	0.07978436	0.094669331	0.809924752	0.00725901	0.088146908	0.085277626	0.011477544	0	0	0.857514153	0.003661018	0.042069659
2. CVD Fall	1	Men	2014	62	0.958532436	0.00630596	4.57E-05	0.007146864	0.016079201	0.000696152	0.011193702	0.93826167	0.008287683	0.031324973	0.007441563	0.014684111	0.887214513	0.062873809	0.017723504	0.032188175	0.009123486	0.93112444	0.02413406	0.003715907	0.031902107	0.07430441	0.859360805	0.016647087	0.049687698	0.044478914	0.849096838	0.028861566	0.077562682	0.094383706	0.813014067	0.006953732	0.085648495	0.088790747	0.014336744	0.000218913	0.014820823	0.837330651	0.003509237	0.040992884
2. CVD Fall	1	Men	2014	63	0.95457839	0.007340862	6.81E-05	0.009128153	0.017288108	0.000667682	0.01092867	0.932391526	0.012674271	0.033473247	0.007127912	0.014333044	0.908902459	0.042773388	0.016942775	0.031381378	0.009275907	0.929928603	0.026130553	0.003561855	0.031103083	0.068520482	0.867177499	0.015917083	0.048384936	0.042567388	0.854514703	0.027530983	0.075386927	0.077265333	0.832872895	0.006661271	0.083200501	0.088004627	0.014089635	0.00022956	0.015802096	0.838568613	0.003363888	0.039941582
2. CVD Fall	1	Men	2014	64	0.956632867	0.007302092	6.15E-05	0.008291021	0.016401147	0.000640432	0.010670937	0.921968511	0.018340148	0.038872438	0.006827439	0.013991464	0.899736879	0.05347445	0.016194146	0.030594525	0.009721941	0.934786858	0.02175302	0.003414343	0.030323837	0.068741393	0.868929518	0.015217148	0.04711194	0.085564864	0.814924645	0.026254442	0.073256049	0.093854389	0.818962706	0.006381114	0.080801792	0.100037721	0.014607654	0.00021872	0.014533399	0.828462567	0.003224713	0.038915224
2. CVD Fall	1	Men	2014	65	0.949926791	0.007508988	6.58E-05	0.008621135	0.017071523	0.000927942	0.015877819	0.921238108	0.012810777	0.035260556	0.009877658	0.020812901	0.864105534	0.067069986	0.023375977	0.045448503	0.009391601	0.917590701	0.023026482	0.004943819	0.045047397	0.070129421	0.838009356	0.021970885	0.069890337	0.067465214	0.786286804	0.037805904	0.108442078	0.08367636	0.787552493	0.009232931	0.119538216	0.093642148	0.014419298	0.000363024	0.024194952	0.80494167	0.004669458	0.05776945
2. CVD Fall	1	Men	2014	66	0.946261967	0.007627876	7.54E-05	0.009711435	0.019926195	0.000890256	0.01550688	0.920335246	0.014415071	0.035467706	0.009461285	0.020320692	0.867173533	0.066181319	0.022336501	0.044308647	0.010502421	0.908807902	0.032031409	0.004739619	0.043918649	0.078080879	0.832881404	0.020999173	0.068038543	0.065420662	0.793220042	0.036031683	0.105327612	0.079282127	0.795844354	0.008844759	0.116028761	0.099190003	0.014433768	0	0	0.825620088	0.004476811	0.056279331
2. CVD Fall	1	Men	2014	67	0.944229863	0.008641198	9.38E-05	0.010646121	0.020388177	0.000854207	0.01514662	0.923557348	0.010964822	0.036572959	0.009062547	0.019842324	0.883805597	0.051656851	0.021339992	0.04319756	0.010764618	0.909536296	0.032336471	0.004544179	0.042818436	0.065107949	0.84859495	0.0200677	0.066229401	0.053048239	0.810344328	0.034330045	0.102277388	0.086469979	0.792466981	0.008473053	0.112589988	0.093854444	0.014471749	0.000296286	0.019766396	0.812493637	0.004292434	0.054825053
2. CVD Fall	1	Men	2014	68	0.942058955	0.008632002	9.97E-05	0.011315996	0.022276721	0.000819731	0.014796916	0.910076475	0.021211256	0.040653887	0.008680757	0.019377625	0.873601254	0.063899199	0.020384779	0.042114768	0.012043845	0.908391912	0.033460792	0.004357161	0.041746289	0.067539518	0.848823464	0.0191749	0.064462118	0.064309814	0.803701669	0.032698268	0.099290249	0.081463732	0.801198402	0.008117171	0.109220694	0.093825743	0.014696085	0.000253193	0.016683591	0.817019399	0.00411601	0.05340598
2. CVD Fall	1	Men	2014	69	0.942794011	0.008142915	0.000103385	0.01243373	0.021281529	0.00078677	0.014457661	0.912405664	0.016183637	0.044169003	0.008315257	0.018926439	0.870343479	0.069127419	0.019469271	0.041059831	0.012029513	0.905142847	0.037947626	0.00417824	0.040701775	0.079321016	0.839623748	0.018319278	0.062735958	0.061737763	0.810763314	0.031133767	0.096365157	0.054378197	0.831925481	0.007776502	0.105919821	0.105819145	0.016766449	0	0	0.821445658	0.003947231	0.052021517
2. CVD Fall	1	Men	2014	70	0.928303132	0.008931241	0.000126224	0.01380967	0.024070652	0.001313428	0.023445653	0.894715971	0.017483136	0.043268258	0.013852092	0.030680542	0.825043148	0.076194154	0.032331924	0.066430773	0.013888147	0.873747843	0.039541998	0.006968476	0.065853537	0.069114063	0.799145515	0.030431966	0.101308456	0.038183389	0.755123653	0.051534501	0.155158456	0.084444811	0.732197904	0.012956559	0.170400727	0.096731028	0.016191301	0.000286089	0.017076453	0.779046453	0.006583626	0.084085049
2. CVD Fall	1	Men	2014	71	0.923790361	0.009359364	0.000158189	0.016462533	0.026051556	0.001261082	0.022916916	0.895580664	0.021993521	0.039179859	0.013269927	0.029976028	0.843047403	0.06131178	0.030870151	0.064770666	0.0096168	0.881796677	0.037692604	0.006683913	0.064210006	0.068416113	0.803940641	0.029066026	0.09857722	0.047543495	0.752915282	0.049035189	0.150506035	0.071093934	0.751346102	0.012414036	0.165145928	0.091838396	0.017453533	0	0	0.802493005	0.006315218	0.081899849
2. CVD Fall	1	Men	2014	72	0.924682273	0.009977109	0.000162779	0.015890546	0.025671086	0.001211087	0.022405119	0.892867364	0.021853343	0.043272967	0.012712982	0.029293344	0.847985585	0.059389577	0.029469902	0.063154937	0.013602964	0.875661633	0.041712996	0.006411903	0.062610504	0.0651247	0.811206482	0.027757675	0.095911142	0.062422423	0.744984246	0.046640711	0.14595262	0.067503389	0.760600696	0.011895066	0.160000848	0.108793129	0.019088931	0	0	0.786289696	0.006058664	0.079769581
2. CVD Fall	1	Men	2014	73	0.916297576	0.010292375	0.000228511	0.021491224	0.028616774	0.001163359	0.021910182	0.885980018	0.030923416	0.042283894	0.012180318	0.028632354	0.829714742	0.080573259	0.028128912	0.061583087	0.01288997	0.875762432	0.044141074	0.006151986	0.061054538	0.071378192	0.808807628	0.026504787	0.093309392	0.055079124	0.759076139	0.044347424	0.141497313	0.076059375	0.757577136	0.011398774	0.154964715	0.098896602	0.020339335	0.000497997	0.023401282	0.773357691	0.005813528	0.077693563
2. CVD Fall	1	Men	2014	74	0.919583227	0.010896317	0.000180907	0.016150514	0.030639171	0.001117817	0.021432046	0.884578936	0.030567994	0.045189076	0.011671044	0.027992951	0.852982135	0.060118156	0.02684503	0.060054679	0.017093747	0.878810329	0.038650523	0.005903723	0.059541678	0.074732975	0.809190443	0.02530534	0.090771243	0.059094016	0.761614684	0.042151877	0.137139423	0.074783921	0.764254746	0.010924326	0.150037007	0.100149442	0.018599325	0.001450772	0.070906565	0.727643301	0.0055794	0.075671195
2. CVD Fall	1	Men	2014	75	0.893747975	0.010945027	0.000272186	0.023992844	0.034130325	0.001865639	0.035046003	0.873194089	0.018620271	0.043015494	0.019421203	0.045748943	0.774631048	0.083006703	0.044481739	0.097880511	0.017030587	0.822972969	0.053107782	0.009840044	0.097048617	0.065210759	0.745281119	0.041948578	0.147559544	0.03781524	0.670572598	0.069546929	0.222065233	0.072001092	0.667130452	0.018182444	0.242686013	0.107110136	0.020825334	0.000336283	0.015554884	0.723703041	0.009300328	0.123169994
2. CVD Fall	1	Men	2014	76	0.898642198	0.012847386	0.000253214	0.019075236	0.033085201	0.001793765	0.034303	0.851099873	0.036649429	0.048884715	0.01861376	0.044752223	0.793645884	0.06844427	0.042440191	0.095469654	0.016906868	0.827963131	0.05102006	0.009447299	0.094662642	0.062292596	0.754138436	0.040041541	0.143527427	0.05168485	0.667152103	0.066057115	0.215105933	0.080502945	0.667254341	0.017430405	0.23481231	0.102909089	0.024156393	6.70E-05	0.002699485	0.741270972	0.008929996	0.119967051
2. CVD Fall	1	Men	2014	77	0.887376739	0.012684225	0.000344723	0.026113483	0.038167452	0.001725316	0.033588063	0.84730764	0.042190867	0.048867367	0.017842743	0.043791383	0.78979594	0.076586552	0.040487704	0.093129804	0.012743545	0.830525425	0.055311152	0.009072744	0.092347134	0.076006516	0.746176707	0.038217802	0.139598975	0.059908027	0.669063056	0.062720835	0.208308082	0.074995386	0.681172572	0.016712392	0.227119649	0.1004845	0.023482682	0	0	0.750604438	0.008576848	0.116851532
2. CVD Fall	1	Men	2014	78	0.893361783	0.012444819	0.000304921	0.023610919	0.035716094	0.001660182	0.032901282	0.865824553	0.023662797	0.050539281	0.017106898	0.04286647	0.79267374	0.077844382	0.038621248	0.09086063	0.018330558	0.818180221	0.064671681	0.008715773	0.090101768	0.066846439	0.760905393	0.036474516	0.135773652	0.062731836	0.676063028	0.059533233	0.201671902	0.073479692	0.690884315	0.016027239	0.219608754	0.113912735	0.026871358	0	0	0.737152646	0.008240308	0.113822954
2. CVD Fall	1	Men	2014	79	0.883232519	0.01362184	0.000406438	0.028566352	0.040331793	0.001598259	0.032242798	0.849329086	0.041833777	0.050454508	0.01640504	0.041977589	0.782941254	0.091558896	0.036837952	0.088661898	0.018710413	0.83074543	0.054242033	0.008375809	0.087926316	0.075666332	0.7574736	0.034808982	0.132051085	0.063066834	0.685245543	0.056489693	0.19519793	0.048242027	0.724103429	0.015373839	0.212280704	0.107333126	0.024043363	0.00184635	0.069469634	0.678506729	0.007919837	0.11088096
2. CVD Fall	1	Men	2014	80	0.853534219	0.015998981	0.000583928	0.034628715	0.036847104	0.002825354	0.055581699	0.809016036	0.043129327	0.046668398	0.028880335	0.072305904	0.69404706	0.089326225	0.064483367	0.152143348	0.019381887	0.76388993	0.051059733	0.014778394	0.150890055	0.075341314	0.637884793	0.060966106	0.225807786	0.046391503	0.523161005	0.098345947	0.332101545	0.063631099	0.548623982	0.027072754	0.360672165	0.112015386	0.031382628	0	0	0.65269597	0.013975655	0.189930361
2. CVD Fall	1	Men	2014	81	0.849473497	0.017266491	0.000631344	0.034643557	0.040737584	0.002722979	0.054524547	0.794963803	0.048661824	0.057792721	0.027710902	0.070870749	0.696417687	0.093556649	0.061500988	0.148524676	0.02520737	0.743187814	0.070080366	0.014213971	0.14731048	0.080172	0.642023874	0.058180894	0.219623232	0.047395271	0.538045425	0.093265088	0.321294215	0.060936075	0.564640629	0.025984479	0.348438817	0.10516946	0.025112848	0.000666425	0.025184774	0.645361583	0.013443725	0.185061185
2. CVD Fall	1	Men	2014	82	0.836519483	0.015452051	0.000664743	0.040580606	0.050638689	0.002626006	0.053518422	0.81307265	0.035448022	0.055381195	0.026598004	0.069500128	0.707545311	0.088768092	0.058656983	0.145029614	0.020692382	0.746340711	0.075435337	0.013677965	0.143853605	0.070521739	0.660334272	0.055524992	0.213618997	0.043138985	0.557657741	0.088425477	0.310777797	0.055814293	0.582700891	0.024949045	0.336535771	0.114635557	0.032786429	0.001310398	0.037121268	0.620864074	0.01293865	0.180343623
2. CVD Fall	1	Men	2014	83	0.848925904	0.01781258	0.000584841	0.031204437	0.046374009	0.002534293	0.052563935	0.784747155	0.059137654	0.062380638	0.02553991	0.068194643	0.689778124	0.112616421	0.05594707	0.141658384	0.024477653	0.743168632	0.078664499	0.013169558	0.14051966	0.074068978	0.66514119	0.052994382	0.20779545	0.052507318	0.563117673	0.083820032	0.300554976	0.066769666	0.584298724	0.023964843	0.324966766	0.120488283	0.02670043	0.004271454	0.133642475	0.526659844	0.012459662	0.175777852
2. CVD Fall	1	Men	2014	84	0.846140041	0.020667438	0.000488441	0.022599295	0.055995284	0.002447712	0.051661789	0.791649206	0.059486305	0.057374504	0.024534989	0.066954996	0.700749217	0.107472267	0.053367174	0.138411342	0.024055607	0.728270808	0.097676596	0.012687987	0.137309002	0.077798364	0.669463233	0.05058524	0.202153163	0.046874257	0.583055101	0.079441932	0.29062871	0.061594706	0.601639152	0.023030358	0.313735784	0.108900862	0.029233814	0.003339538	0.099184074	0.575971455	0.012006044	0.171364214
2. CVD Fall	1	Men	2014	85	0.836311235	0.024250832	0.000532641	0.020959148	0.052770351	0.002963635	0.062212158	0.778792272	0.068124705	0.043006985	0.029536464	0.080539574	0.666759812	0.103830535	0.063769862	0.165639792	0.02569132	0.706187856	0.088465765	0.015321458	0.164333601	0.080453091	0.618238878	0.060488919	0.240819112	0.045118937	0.516543539	0.09429514	0.344042384	0.077787153	0.523689062	0.027735923	0.370787862	0.121497121	0.034101238	0.006465766	0.152919087	0.465924997	0.014500543	0.204591248
2. CVD Fall	1	Men	2014	86	0.767501081	0.027445236	0.002535008	0.082020955	0.056391268	0.00286762	0.061238832	0.737163242	0.094808399	0.060436917	0.028405322	0.079186119	0.656753045	0.120426873	0.060849804	0.161970277	0.037260426	0.688517735	0.098732486	0.01478291	0.160706443	0.096424255	0.611455712	0.057762237	0.234357796	0.036861115	0.54115534	0.089356425	0.33262712	0.068234144	0.547200893	0.026684758	0.357880205	0.109044052	0.048110992	0.00352174	0.064685773	0.561082044	0.013993494	0.199561905
2. CVD Fall	1	Men	2014	87	0.775447613	0.020938024	0.001790309	0.076979595	0.061733963	0.002777635	0.06033286	0.757039354	0.079455061	0.058253663	0.027335338	0.077916583	0.669535208	0.113931267	0.058078611	0.158454914	0.019956085	0.703542854	0.104993213	0.014275503	0.157232345	0.078921183	0.637782584	0.055174613	0.228121621	0.034910442	0.558824488	0.084678303	0.321586768	0.052473616	0.576434063	0.025690823	0.345401497	0.113377276	0.022207634	0.017879608	0.428137802	0.21016076	0.013515905	0.194721015
2. CVD Fall	1	Men	2014	88	0.790926356	0.023953373	0.001791539	0.067796531	0.053343067	0.002693579	0.059495556	0.770255651	0.056198877	0.070488274	0.026324906	0.076732293	0.65063469	0.138818735	0.055451987	0.155094587	0.027963697	0.675063095	0.129262476	0.013798535	0.153912197	0.060789139	0.664376941	0.052722043	0.222111876	0.050202104	0.558619637	0.080253069	0.31092519	0.068734394	0.573156538	0.024752635	0.333356433	0.107641186	0.037649346	0.010272916	0.204093337	0.437206588	0.013067121	0.190069507
2. CVD Fall	1	Men	2014	89	0.805716453	0.02202266	0.001094224	0.046240169	0.063582793	0.00261536	0.058728342	0.722649542	0.103202103	0.073141169	0.025372511	0.075634674	0.665219081	0.129924905	0.052965788	0.151890226	0.029300692	0.699013589	0.107587423	0.013351365	0.150746932	0.068096165	0.665173297	0.05040067	0.216329868	0.051892325	0.571388548	0.076073125	0.300646001	0.066340555	0.588041363	0.0238688	0.321749282	0.122278356	0.036123579	0.00644393	0.144937486	0.491961762	0.012646542	0.185608345
2. CVD Fall	1	Men	2014	90	0.69312926	0.025846261	0.002209813	0.076554348	0.076778299	0.005107706	0.120374313	0.638169664	0.080005069	0.077869773	0.049164216	0.154791278	0.444885434	0.144709886	0.101667823	0.308736857	0.040509518	0.520986817	0.106081249	0.025978174	0.306444242	0.065891004	0.40007685	0.096828607	0.43720354	0.051031631	0.200992647	0.144882996	0.603092726	0.070304494	0.239193342	0.046274387	0.644227777	0.129625176	0.033346849	0.017633938	0.328259854	0.090380396	0.024612763	0.376141025
2. CVD Fall	1	Men	2014	91	0.704092729	0.026223757	0.00193013	0.066626289	0.0770701	0.004973628	0.119083367	0.619789289	0.118736352	0.061114747	0.047475928	0.152883685	0.488972194	0.111070685	0.097214097	0.302743024	0.032006567	0.492667521	0.149602612	0.025196252	0.300527048	0.077597882	0.403568886	0.092670606	0.426162626	0.048763332	0.230432929	0.137427235	0.583376503	0.055330808	0.277969684	0.044709698	0.621989809	0.147540297	0.049012991	0.005784731	0.099780436	0.306320539	0.023878114	0.367682894
2. CVD Fall	1	Men	2014	92	0.662153153	0.029620096	0.003744511	0.108485517	0.073197944	0.004850914	0.117947865	0.600177128	0.128552465	0.074208609	0.04589606	0.151165738	0.487571372	0.122331584	0.093018757	0.297078287	0.043047302	0.498801148	0.138743851	0.024470956	0.294936743	0.06404084	0.431603824	0.088754191	0.415601146	0.049639816	0.2554711	0.130419	0.564470084	0.05303216	0.303042793	0.043246714	0.600678333	0.128674167	0.054328735	0	0	0.434174965	0.023197138	0.359624995
2. CVD Fall	1	Men	2014	93	0.686795352	0.0383203	0.003643088	0.083172782	0.066357468	0.004739503	0.116971507	0.622113628	0.11063643	0.073186824	0.044422163	0.149640954	0.447908207	0.17127343	0.089074204	0.291744158	0.043713426	0.516623777	0.126186524	0.023801412	0.28967486	0.070555599	0.438851423	0.085072349	0.405520629	0.046021256	0.2837593	0.12384325	0.546376194	0.068128983	0.309692186	0.041883207	0.580295624	0.13317999	0.052255717	0.008775302	0.135008998	0.296242382	0.022569036	0.351968575
2. CVD Fall	1	Men	2014	94	0.654273621	0.038879358	0.003974772	0.088776429	0.093298328	0.004639362	0.116158131	0.561309776	0.169336848	0.077988582	0.043051893	0.148312901	0.516090733	0.111794525	0.085372917	0.286741825	0.049489143	0.496976058	0.145605355	0.023186833	0.284742611	0.060772317	0.461687571	0.081618158	0.395921954	0.037444932	0.31577443	0.117684886	0.529095752	0.05735881	0.341182485	0.040617053	0.560841653	0.121125498	0.040285829	0.00490039	0.103548374	0.363432406	0.021993094	0.34471441
2. CVD Fall	1	Men	2014	95	0.66896063	0.036729331	0.003513045	0.083784109	0.086950719	0.004550489	0.115511677	0.64744872	0.091732321	0.071850821	0.041782993	0.147185145	0.484984642	0.151035895	0.081907414	0.282072048	0.062697579	0.463210651	0.171324467	0.022626516	0.280140787	0.060490585	0.474319459	0.078384743	0.386805213	0.04680292	0.328640686	0.111928721	0.512627673	0.039927558	0.37831234	0.039446218	0.542313884	0.126361721	0.052714362	0.016910171	0.225966441	0.218715936	0.02146868	0.337862689
2. CVD Fall	1	Men	2014	96	0.61453323	0.03854953	0.005509448	0.119537658	0.102361065	0.004472912	0.115036159	0.546138573	0.185912762	0.081074185	0.040613276	0.146261204	0.454847264	0.188747449	0.078670222	0.277735065	0.062134754	0.469558848	0.170316904	0.022119833	0.275869661	0.060924956	0.485540223	0.075365245	0.378169575	0.026823143	0.36964869	0.106559467	0.4969687	0.057822122	0.379102014	0.038368738	0.524707126	0.112761788	0.048629145	0.032339893	0.367070721	0.086790314	0.020995238	0.331412901
2. CVD Fall	1	Men	2014	97	0.610739526	0.037633395	0.005302313	0.118191937	0.108990521	0.00440669	0.114735617	0.506008565	0.222309663	0.086596684	0.039540606	0.145544482	0.491057043	0.159558626	0.075653842	0.27373049	0.071639201	0.496223399	0.138542289	0.021666224	0.271928887	0.070863052	0.486570987	0.072552794	0.370013167	0.026676097	0.389648899	0.101561728	0.482113275	0.04975828	0.404845596	0.037382702	0.508013422	0.126341756	0.086946964	0.00619567	0.060322421	0.374257187	0.020572279	0.325363722
2. CVD Fall	1	Men	2014	98	0.53312283	0.036028727	0.008249817	0.178066538	0.125566098	0.004351914	0.114614077	0.474755341	0.26965386	0.071989712	0.038562876	0.145038211	0.546740644	0.11035141	0.07285073	0.270057216	0.060744213	0.503575647	0.146097543	0.021265189	0.268317408	0.066366302	0.501360262	0.069940477	0.362332958	0.049244372	0.385782165	0.096920015	0.468053448	0.041859251	0.429432518	0.036486235	0.492221995	0.134427551	0.054683828	0.025499872	0.29251828	0.152958182	0.020199374	0.319712914
2. CVD Fall	1	Men	2014	99	0.61263579	0.037845425	0.004541363	0.102599641	0.123393579	0.004308705	0.114675498	0.486720617	0.232819752	0.098036264	0.037677992	0.144745375	0.486125856	0.176907543	0.070253274	0.266713327	0.063322234	0.522129289	0.128598837	0.020916278	0.265033361	0.074338979	0.503015027	0.067521324	0.35512467	0.050409877	0.402192533	0.092618752	0.454778838	0.072049848	0.414953428	0.035677478	0.477319246	0.116943665	0.077979048	0.002822804	0.03211209	0.435809014	0.019876147	0.314457232
2. CVD Fall	1	Men	2014	100	0.438833732	0.037974636	0.014286743	0.259084218	0.130619746	0.004277216	0.11492371	0.493999923	0.22300208	0.101445508	0.036883851	0.144668638	0.494903196	0.173547013	0.067853779	0.263696011	0.077608643	0.462956709	0.176741571	0.020619082	0.262073995	0.06081095	0.525518064	0.065288288	0.348382698	0.038230262	0.430850796	0.088642313	0.442276629	0.059306589	0.442450043	0.034954567	0.463288801	0.117939883	0.068059257	0.007643127	0.093319707	0.383843418	0.019602264	0.309592344
2. CVD Fall	1	Men	2015	35	0.992126804	0.001833308	0	0	0.003113834	0.000138296	0.002787758	0.981968776	0	0.012863246	0.001501115	0.003666862	0.968187356	0.020003687	0.003661237	0.00814772	0	0.991183249	0	0.000743245	0.008073506	0.040154371	0.943663906	0.003430233	0.01275149	0	0.973524257	0.006121682	0.020354061	0	0.975974893	0.001401148	0.022623959	0.067008055	0.003332155	0	0	0.918509978	0.000701579	0.010448233
2. CVD Fall	1	Men	2015	36	0.992672773	0.001548135	0	0	0.002926807	0.000132552	0.002719733	0.971340236	0	0.02364401	0.001438485	0.00357727	0.966110278	0.022435001	0.00350739	0.007947332	0	0.991412723	0	0.000712313	0.007874964	0.060724474	0.923553564	0.003286202	0.01243576	0	0.974293109	0.005862372	0.019844519	0	0.976601548	0.001342707	0.022055745	0.080636751	0.003804855	0	0	0.90469561	0.000672385	0.010190399
2. CVD Fall	1	Men	2015	37	0.991545379	0.002490617	0	0	0.003183582	0.000127047	0.002653376	0.975108009	0	0.020023671	0.001378451	0.003489868	0.984390567	0.004497761	0.003359894	0.007751777	0	0.991636122	0	0.000682665	0.007681213	0.094389678	0.890334659	0.00314812	0.012127543	0	0.975039451	0.005613714	0.019346835	0	0.977212641	0.001286691	0.021500668	0.072223124	0.002983366	0	0	0.914210365	0.000644403	0.009938742
2. CVD Fall	1	Men	2015	38	0.991615398	0.002535457	0	0	0.003138726	0.000121771	0.002588647	0.968934274	0	0.026340212	0.001320908	0.003404605	0.95390669	0.035313887	0.003218485	0.007560938	0	0.991853616	0	0.000654249	0.007492135	0.09135525	0.893802363	0.003015739	0.011826648	0	0.97576404	0.005375262	0.018860697	0	0.977808622	0.001232999	0.020958379	0.07896948	0.005070745	0	0	0.905649082	0.000617584	0.009693108
2. CVD Fall	1	Men	2015	39	0.990723418	0.002462076	0	0	0.004172284	0.000116714	0.002525508	0.982141405	0	0.013271415	0.001265751	0.003321429	0.96690482	0.022637573	0.00308291	0.007374697	0	0.992065371	0	0.000627015	0.007307614	0.079816579	0.905761707	0.002888823	0.011532891	0	0.976467608	0.005146592	0.0183858	0	0.978389931	0.001181534	0.020428536	0.06159259	0.005571264	0	0	0.922790918	0.00059188	0.009453347
2. CVD Fall	1	Men	2015	40	0.991262928	0.002135732	0	0	0.002755016	0.000236795	0.003609529	0.976835171	0	0.015850613	0.002567341	0.004746875	0.965740168	0.017471967	0.006250538	0.010537327	0	0.988286521	0	0.001271966	0.010441513	0.077374033	0.900293681	0.005857288	0.016474998	0	0.963315586	0.010429745	0.02625467	0	0.968435031	0.002396567	0.029168403	0.076017466	0.006421161	0	0	0.902854808	0.001200702	0.013505863
2. CVD Fall	1	Men	2015	41	0.988392661	0.002480369	0	0	0.00537848	0.000226964	0.003521526	0.979717085	0	0.013191919	0.002460072	0.004630924	0.968470237	0.015265552	0.005986736	0.010277475	0	0.988596926	0	0.00121901	0.010184064	0.095910557	0.882414316	0.005610346	0.016064781	0	0.964424832	0.009984565	0.025590603	0	0.969276303	0.00229648	0.028427217	0.080338773	0.003888868	0	0	0.901450446	0.001150722	0.013171191
2. CVD Fall	1	Men	2015	42	0.989223451	0.002802416	0	0	0.004320899	0.000217543	0.00343569	0.974870384	0	0.018254546	0.002357251	0.004517819	0.945112315	0.039130007	0.005733802	0.010023876	0	0.988898933	0	0.001168254	0.009932813	0.065269534	0.913692637	0.005373586	0.015664243	0	0.965500672	0.009557604	0.024941724	0	0.970096626	0.002200544	0.02770283	0.070878336	0.005574295	0	0	0.909600056	0.00110282	0.012844493
2. CVD Fall	1	Men	2015	43	0.988409985	0.002508395	0	0	0.005521134	0.000208514	0.003351972	0.975352026	0	0.017981789	0.002258693	0.004407492	0.957922731	0.026809608	0.005491284	0.009776377	0	0.989192784	0	0.001119609	0.009687606	0.09816903	0.881411249	0.005146582	0.015273139	0	0.96654427	0.009148102	0.024307627	0	0.970896626	0.002108588	0.026994786	0.089442116	0.0046863	0	0	0.892289103	0.00105691	0.012525571
2. CVD Fall	1	Men	2015	44	0.988184711	0.002702646	0	0	0.005642459	0.000199862	0.003270321	0.958925179	0	0.034610721	0.002164222	0.004299878	0.975579456	0.009626967	0.005258749	0.009534828	0	0.989478716	0	0.001072987	0.009448298	0.077160349	0.903019492	0.004928929	0.014891229	0	0.967556754	0.008755332	0.023687914	0	0.971676915	0.002020446	0.026302639	0.078773884	0.005706182	0	0	0.902292795	0.001012909	0.01221423
2. CVD Fall	1	Men	2015	45	0.986111198	0.003055214	0	0	0.00597864	0.000337916	0.004517033	0.967327573	0	0.023075936	0.00365779	0.005938701	0.971924952	0.006027691	0.008882725	0.013164631	0	0.985140925	0	0.001813846	0.013045229	0.060398332	0.910722135	0.008326133	0.0205534	0	0.952543549	0.014779189	0.032677262	0	0.96030668	0.003414885	0.036278435	0.066748909	0.006613655	0	0	0.90806385	0.001712307	0.01686128
2. CVD Fall	1	Men	2015	46	0.98495409	0.003245281	0	0	0.007069635	0.0003239	0.004407095	0.97021911	0	0.020482438	0.003504684	0.005793767	0.944250136	0.034405353	0.008505603	0.012838909	0	0.985539159	0	0.001738307	0.012722534	0.064604032	0.907385017	0.007973172	0.02003778	0	0.954019208	0.01414176	0.031839032	0	0.961386213	0.003272042	0.035341745	0.064530304	0.0057401	0	0	0.911647394	0.001641016	0.016441186
2. CVD Fall	1	Men	2015	47	0.98626714	0.003019267	0	0	0.006103237	0.000310469	0.004299887	0.973667016	0	0.017322642	0.003357929	0.005652413	0.964147768	0.015187239	0.008143982	0.01252101	0	0.985926496	0	0.001665911	0.012407593	0.073689086	0.899141974	0.007634732	0.019534208	0	0.955450136	0.013530307	0.031019557	0	0.962439117	0.003135125	0.034425757	0.077798879	0.007367621	0	0	0.897229763	0.001572692	0.016031044
2. CVD Fall	1	Men	2015	48	0.985752156	0.003103332	0	0	0.006651564	0.000297599	0.004195348	0.965268716	0	0.025999468	0.00321726	0.005514557	0.952199314	0.027792721	0.00779722	0.012210746	0	0.986303253	0	0.001596529	0.012100219	0.077686944	0.895960469	0.007310211	0.019042376	0	0.956837922	0.01294375	0.030218329	0	0.963466212	0.003003891	0.033529898	0.081800353	0.007313286	0	0	0.893748542	0.001507213	0.015630605
2. CVD Fall	1	Men	2015	49	0.984811629	0.003692065	0	0	0.007117621	0.000285267	0.004093418	0.966736896	0	0.024800559	0.003082426	0.005380118	0.94773598	0.03289139	0.007464699	0.011907931	0	0.986669736	0	0.001530035	0.011800229	0.064940978	0.909498004	0.006999032	0.018561987	0	0.958184097	0.012381054	0.029434849	0	0.964468287	0.002878102	0.032653611	0.08448648	0.006355177	0	0	0.892474252	0.001444462	0.015239629
2. CVD Fall	1	Men	2015	50	0.973924852	0.0039455	3.20E-05	0.008025001	0.00783585	0.000447895	0.005788854	0.948260598	0.02013161	0.019162859	0.004837141	0.007607793	0.937580714	0.033884163	0.011704436	0.016830687	0.004880719	0.961892604	0.014146358	0.002401731	0.016678588	0.067011028	0.895790576	0.010975243	0.026223153	0.074899961	0.864153262	0.019395216	0.041551561	0.076981159	0.872417372	0.004516676	0.046084793	0.076301482	0.007044408	0.000130845	0.018104769	0.874616435	0.002267441	0.02153462
2. CVD Fall	1	Men	2015	51	0.977303539	0.004530763	1.83E-05	0.004015301	0.008054266	0.00042935	0.005648433	0.959204842	0.005133196	0.023605204	0.004634238	0.007422519	0.968054024	0.004329777	0.011203577	0.016412621	0.005872209	0.964235292	0.011326359	0.002301707	0.016264434	0.074482182	0.889452439	0.010506573	0.025558807	0.03464342	0.906344286	0.018546924	0.040465371	0.120260775	0.830542708	0.004327395	0.044869122	0.077642058	0.007140169	5.03E-06	0.000699068	0.891346253	0.002173047	0.020994373
2. CVD Fall	1	Men	2015	52	0.98117613	0.004034757	3.68E-06	0.000907296	0.007955008	0.000411581	0.00551155	0.950546507	0.012565039	0.02520682	0.004439758	0.007241876	0.941345957	0.031926181	0.010723264	0.016004599	0.005046128	0.966405359	0.010482422	0.002205855	0.015860235	0.06051893	0.904514103	0.010057149	0.024909818	0.076278936	0.86658515	0.017733054	0.03940286	0.095224008	0.856950495	0.004145975	0.043679523	0.084015622	0.009003609	5.65E-05	0.006180533	0.878194283	0.002082591	0.020466853
2. CVD Fall	1	Men	2015	53	0.977051749	0.004958884	1.43E-05	0.002860978	0.009341404	0.000394557	0.005378129	0.95762105	0.006263076	0.024796757	0.004253353	0.007065763	0.954442696	0.019688277	0.010262645	0.015606382	0.005918009	0.966791562	0.009710668	0.002114003	0.015465758	0.082090888	0.884007137	0.009626176	0.024275799	0.066870504	0.877813928	0.016952185	0.038363382	0.084208572	0.869304061	0.003972093	0.042515275	0.085350369	0.009962108	0.000120765	0.011856446	0.870762651	0.001995912	0.01995175
2. CVD Fall	1	Men	2015	54	0.977563263	0.00519078	1.12E-05	0.002140011	0.009468411	0.000378247	0.005248098	0.964809524	0.00153626	0.022685441	0.004074692	0.006894084	0.943773176	0.031188174	0.009820907	0.015217743	0.00744131	0.961343948	0.014107981	0.002025987	0.015080775	0.085810581	0.881320152	0.009212892	0.023656375	0.061302697	0.88514803	0.016202958	0.037346314	0.076193998	0.878624884	0.003805439	0.041375679	0.080562549	0.0092028	0	0	0.888873035	0.001912854	0.019448763
2. CVD Fall	1	Men	2015	55	0.968277113	0.00538155	4.13E-05	0.00757141	0.010038185	0.000587146	0.008103314	0.953633579	0.00130409	0.028098592	0.00632035	0.010643389	0.919081176	0.042224911	0.015215762	0.023478151	0.006967287	0.954195516	0.01242625	0.003143858	0.023267089	0.07607517	0.873176596	0.014275503	0.036472731	0.067861084	0.849551161	0.025071312	0.057516443	0.083617192	0.846778309	0.005903026	0.063701472	0.089982959	0.010786262	0	0	0.86626675	0.002968369	0.029995659
2. CVD Fall	1	Men	2015	56	0.967682077	0.005582228	3.65E-05	0.006461667	0.011766633	0.000562912	0.007907971	0.956881957	0.003586654	0.02309143	0.00605462	0.010385339	0.920058445	0.042491128	0.014557934	0.022892494	0.0076121	0.952426608	0.01426131	0.003013017	0.022686965	0.07343876	0.877363994	0.013660118	0.035537128	0.109257196	0.810813113	0.023954431	0.055975261	0.084602527	0.847769116	0.005655172	0.061973184	0.08866456	0.010044944	0.000341352	0.032524292	0.836343171	0.002844902	0.029236778
2. CVD Fall	1	Men	2015	57	0.964545739	0.005373339	5.39E-05	0.009882004	0.011887621	0.000539698	0.007717673	0.950972558	0.010180146	0.02291347	0.005799948	0.010133877	0.925728015	0.038023954	0.013927057	0.022320974	0.006390267	0.949389195	0.019212025	0.002887657	0.022120856	0.05769838	0.89460869	0.013069983	0.034622947	0.072387231	0.850263268	0.022882742	0.05446676	0.07822986	0.856071696	0.005417641	0.060280804	0.074915373	0.011190722	0.000274236	0.023645242	0.858752091	0.002726608	0.028495729
2. CVD Fall	1	Men	2015	58	0.963960696	0.005638338	5.28E-05	0.00922977	0.013068581	0.000517465	0.007532323	0.934005343	0.023202055	0.027347847	0.005555884	0.009888872	0.901898218	0.063016479	0.013322028	0.021763276	0.009326913	0.948033788	0.018303292	0.002767556	0.021568452	0.067510983	0.886255285	0.012504063	0.033729669	0.064807978	0.860347534	0.021854408	0.05299008	0.099134665	0.837051949	0.005190012	0.058623375	0.093217965	0.012363189	5.21E-06	0.000416182	0.86361208	0.002613278	0.027772093
2. CVD Fall	1	Men	2015	59	0.964121372	0.006005826	5.14E-05	0.008439143	0.013534233	0.000496171	0.007351826	0.939060371	0.016434508	0.029532929	0.005321994	0.009650198	0.930631809	0.035407303	0.012741792	0.021219096	0.00857167	0.952289558	0.015456823	0.002652499	0.02102945	0.065073151	0.890108687	0.011961369	0.032856793	0.045577379	0.882010552	0.020867674	0.051544395	0.075884585	0.862143553	0.004971881	0.05699998	0.085994121	0.010593422	3.69E-05	0.003438436	0.870366894	0.002504711	0.027065471
2. CVD Fall	1	Men	2015	60	0.966543806	0.005860862	1.51E-05	0.00256191	0.012548216	0.000752659	0.011717405	0.929699007	0.018251295	0.028607492	0.008064561	0.015377645	0.896706743	0.050236284	0.019276573	0.0337804	0.006352432	0.935695024	0.020451771	0.00402176	0.033479013	0.076605461	0.853038439	0.018098998	0.052257102	0.052715031	0.833918761	0.031513775	0.081852433	0.08668201	0.815308208	0.007534604	0.090475177	0.095544039	0.011073541	0.000191784	0.016832522	0.82949341	0.003797806	0.043066897
2. CVD Fall	1	Men	2015	61	0.95865935	0.00627606	5.08E-05	0.007975638	0.014878289	0.000721771	0.01143811	0.944694965	0.002628133	0.029944048	0.007724821	0.015008033	0.911186534	0.037446494	0.018432391	0.032934581	0.00822533	0.934601629	0.020676996	0.003854755	0.03264129	0.064020549	0.867773774	0.017309547	0.050896129	0.060817321	0.829516804	0.030076605	0.079589271	0.094669331	0.810181515	0.007217784	0.08793137	0.085277626	0.01094113	0	0	0.858174227	0.003640227	0.04196679
2. CVD Fall	1	Men	2015	62	0.959062625	0.006001294	4.23E-05	0.006956055	0.016079201	0.000692199	0.011166331	0.938563605	0.008063916	0.031324973	0.007399301	0.014648205	0.887393874	0.062873809	0.017622849	0.032109468	0.008680996	0.93166604	0.02413406	0.003694804	0.031824099	0.07430441	0.859576844	0.016552545	0.049566201	0.044478914	0.849450405	0.028697655	0.077373025	0.094383706	0.813262987	0.006914241	0.085439067	0.088790747	0.013647035	0.000202672	0.014430991	0.838546598	0.003489308	0.040892648
2. CVD Fall	1	Men	2015	63	0.955223032	0.006975034	6.30E-05	0.008885012	0.017288108	0.00066389	0.010901947	0.932809259	0.012332066	0.033473247	0.007087431	0.014297996	0.909075414	0.042773388	0.016846554	0.031304644	0.008811439	0.930489353	0.026130553	0.003541626	0.031027029	0.068520482	0.867386206	0.015826687	0.048266625	0.042567388	0.854855393	0.02737463	0.07520259	0.077265333	0.833114168	0.00662344	0.082997059	0.088004627	0.013390019	0.000212178	0.015386623	0.839817853	0.003344783	0.039843916
2. CVD Fall	1	Men	2015	64	0.95726213	0.006928077	5.68E-05	0.008070241	0.016401147	0.000636795	0.010644844	0.922536682	0.017844964	0.038872438	0.006788665	0.013957252	0.899903659	0.05347445	0.016102177	0.030519715	0.009221884	0.935380455	0.02175302	0.003394953	0.030249689	0.068741393	0.869131137	0.015130727	0.046996742	0.085564864	0.815252875	0.026105338	0.073076923	0.093854389	0.819196522	0.006344874	0.080604215	0.100037721	0.013861897	0.000201869	0.014151944	0.829720101	0.003206399	0.038820069
2. CVD Fall	1	Men	2015	65	0.950654091	0.00711572	6.07E-05	0.008391732	0.017071523	0.000914392	0.015791884	0.921840875	0.012464886	0.035260556	0.009733425	0.020700257	0.864692845	0.067069986	0.023034644	0.045202526	0.008897629	0.918400667	0.023026482	0.00487163	0.044803591	0.070129421	0.838708434	0.021650069	0.069512076	0.067465214	0.787425753	0.037253867	0.107855166	0.08367636	0.788334278	0.009098113	0.118891249	0.093642148	0.01367017	0.000334644	0.023560267	0.806734707	0.004601275	0.05745679
2. CVD Fall	1	Men	2015	66	0.947029779	0.007221234	6.94E-05	0.009453155	0.019926195	0.000877257	0.015422953	0.920972586	0.014025865	0.035467706	0.009323132	0.020210712	0.867739496	0.066181319	0.022010346	0.044068839	0.009939884	0.909677344	0.032031409	0.004670412	0.043680952	0.078080879	0.833556271	0.020692546	0.067670304	0.065420662	0.794316229	0.035505553	0.104757556	0.079282127	0.796601477	0.008715609	0.115400787	0.099190003	0.013660658	0	0	0.826763163	0.004411441	0.055974735
2. CVD Fall	1	Men	2015	67	0.945081446	0.008174044	8.63E-05	0.010363636	0.020388177	0.000841734	0.015064643	0.92409312	0.010668772	0.036572959	0.008930217	0.019734933	0.884350996	0.051656851	0.021028388	0.042963765	0.010179685	0.910419326	0.032336471	0.004477826	0.042586693	0.065107949	0.849246424	0.019774674	0.065870953	0.053048239	0.811399159	0.033828762	0.10172384	0.086469979	0.793200065	0.00834933	0.111980626	0.093854444	0.013692941	0.000272622	0.019248368	0.81417354	0.004229757	0.054528328
2. CVD Fall	1	Men	2015	68	0.942930909	0.008160325	9.17E-05	0.011015793	0.022276721	0.000807762	0.014716832	0.910880811	0.020638552	0.040653887	0.008554001	0.019272749	0.874126844	0.063899199	0.020087123	0.041886833	0.011382186	0.909343134	0.033460792	0.004293538	0.041520349	0.067539518	0.849452337	0.01889491	0.064113235	0.064309814	0.804716506	0.032220812	0.098752868	0.081463732	0.801908054	0.007998645	0.108629568	0.093825743	0.013895179	0.000232822	0.016246669	0.818626744	0.004055908	0.053116935
2. CVD Fall	1	Men	2015	69	0.943670701	0.007694463	9.50E-05	0.012103592	0.021281529	0.000775281	0.014379413	0.913066474	0.015746679	0.044169003	0.008193839	0.018824005	0.870849992	0.069127419	0.019184983	0.040837606	0.011363121	0.906090536	0.037947626	0.00411723	0.040481488	0.079321016	0.840230784	0.018051782	0.062396417	0.061737763	0.811739475	0.030679155	0.095843607	0.054378197	0.832612294	0.00766295	0.105346559	0.105819145	0.015837647	0	0	0.822713649	0.003889594	0.051739965
2. CVD Fall	1	Men	2015	70	0.929417703	0.008436483	0.000115968	0.013443657	0.024070652	0.001283581	0.023231956	0.895782439	0.017011091	0.043268258	0.01353731	0.030400902	0.826383366	0.076194154	0.031597195	0.065825285	0.013113791	0.875280782	0.039541998	0.006810121	0.065253309	0.069114063	0.800760452	0.029740413	0.100385071	0.038183389	0.757708957	0.050363402	0.153744252	0.084444811	0.734045467	0.012662126	0.168847595	0.096731028	0.015295823	0.000262844	0.01663091	0.78132673	0.006434016	0.083318649
2. CVD Fall	1	Men	2015	71	0.924997285	0.008838735	0.000145289	0.016026673	0.026051556	0.001232424	0.022708037	0.896749261	0.021399696	0.039179859	0.012968374	0.029702809	0.844339271	0.06131178	0.03016864	0.064180309	0.009077707	0.883072906	0.037692604	0.006532024	0.063624759	0.068416113	0.805499644	0.028405513	0.09767873	0.047543495	0.755401384	0.047920886	0.149134235	0.071093934	0.753133442	0.012131933	0.163640692	0.091838396	0.016475134	0	0	0.804361397	0.006171707	0.081153366
2. CVD Fall	1	Men	2015	72	0.925905371	0.009419186	0.000149461	0.015470424	0.025671086	0.001183565	0.022200906	0.894013298	0.021263302	0.043272967	0.012424085	0.029026348	0.849230906	0.059389577	0.028800211	0.062579306	0.012836626	0.877144346	0.041712996	0.006266196	0.062039835	0.0651247	0.812711453	0.027126895	0.095036952	0.062422423	0.747374432	0.045580821	0.144622323	0.067503389	0.762329347	0.011624756	0.158542507	0.108793129	0.018013536	0	0	0.788229838	0.005920983	0.079042514
2. CVD Fall	1	Men	2015	73	0.917687023	0.009715499	0.000209753	0.020923548	0.028616774	0.001136922	0.02171048	0.887352715	0.030088484	0.042283894	0.011903526	0.028371382	0.830915263	0.080573259	0.027489695	0.061021783	0.012160212	0.877188477	0.044141074	0.006012185	0.060498052	0.071378192	0.810260414	0.025902478	0.092458916	0.055079124	0.761373603	0.043339649	0.140207624	0.076059375	0.759248606	0.011139742	0.153552277	0.098896602	0.019200521	0.000457119	0.02279688	0.77598204	0.005681419	0.076985419
2. CVD Fall	1	Men	2015	74	0.920859853	0.010281385	0.000166014	0.015724458	0.030639171	0.001092415	0.021236702	0.885924635	0.029742658	0.045189076	0.011405825	0.027737807	0.854139549	0.060118156	0.026234989	0.059507306	0.016121837	0.880459096	0.038650523	0.005769563	0.05899898	0.074732975	0.810592837	0.024730287	0.089943901	0.059094016	0.763822535	0.041193994	0.135889455	0.074783921	0.765870521	0.010676076	0.148669483	0.100149442	0.017578755	0.00133134	0.069072348	0.73143402	0.005452611	0.074981483
2. CVD Fall	1	Men	2015	75	0.895138412	0.010327881	0.000249736	0.023360138	0.034130325	0.001829794	0.034963713	0.874177405	0.018117524	0.043015494	0.019048055	0.045641521	0.775715524	0.083006703	0.043627092	0.097650682	0.016059518	0.824360976	0.053107782	0.009650983	0.096820741	0.065210759	0.746433573	0.041142602	0.147213066	0.03781524	0.672430255	0.068210694	0.221543811	0.072001092	0.66804964	0.017833097	0.242116171	0.107110136	0.019646453	0.000308546	0.015153559	0.725778885	0.009121637	0.122880784
2. CVD Fall	1	Men	2015	76	0.900005629	0.012120832	0.000232321	0.018574262	0.033085201	0.001759301	0.034222455	0.852552122	0.035659894	0.048884715	0.018256126	0.044647142	0.794685474	0.06844427	0.04162477	0.095245486	0.015942256	0.829331531	0.05102006	0.009265784	0.094440369	0.062292596	0.755244782	0.039272205	0.143190416	0.05168485	0.668926368	0.064787931	0.214600852	0.080502945	0.668140592	0.017095507	0.234260957	0.102909089	0.02277987	6.15E-05	0.002630319	0.743175456	0.00875842	0.119685361
2. CVD Fall	1	Men	2015	77	0.88891635	0.011971002	0.000316323	0.025427511	0.038167452	0.001692167	0.033509196	0.848892438	0.041051714	0.048867367	0.017499922	0.043688558	0.790792522	0.076586552	0.039709796	0.09291113	0.012018167	0.831641957	0.055311152	0.008898426	0.092130298	0.076006516	0.747238789	0.037483507	0.139271188	0.059908027	0.670757258	0.061515752	0.207818962	0.074995386	0.682026965	0.01639129	0.226586359	0.1004845	0.02214602	0	0	0.752380266	0.008412057	0.116577157
2. CVD Fall	1	Men	2015	78	0.894813045	0.011748437	0.000279901	0.022990212	0.035716094	0.001628284	0.032824028	0.866892784	0.023023902	0.050539281	0.016778216	0.042765817	0.793629132	0.077844382	0.037879202	0.090647284	0.017293384	0.819596419	0.064671681	0.008548313	0.089890204	0.066846439	0.761924998	0.035773716	0.135454847	0.062731836	0.677680403	0.058389396	0.201198365	0.073479692	0.691707907	0.015719301	0.2190931	0.113912735	0.02535093	0	0	0.73909866	0.008081984	0.113555691
2. CVD Fall	1	Men	2015	79	0.8848738	0.012869241	0.000373315	0.02781721	0.040331793	0.001567551	0.03216709	0.850872361	0.040704265	0.050454508	0.016089843	0.041879023	0.783857221	0.091558896	0.036130169	0.088453715	0.017662444	0.832160782	0.054242033	0.008214881	0.08771986	0.075666332	0.758452464	0.034140182	0.131741022	0.063066834	0.68678924	0.055404332	0.194739594	0.048242027	0.724897261	0.015078455	0.211782256	0.107333126	0.022743755	0.001695877	0.067694576	0.682144391	0.007767669	0.110620605
2. CVD Fall	1	Men	2015	80	0.855542283	0.015130995	0.000536809	0.033725093	0.036847104	0.002765339	0.055452378	0.810962227	0.041964836	0.046668398	0.028266869	0.072137671	0.695770783	0.089326225	0.063113633	0.151789358	0.018312324	0.765624485	0.051059733	0.014464476	0.150538982	0.075341314	0.639705197	0.059671085	0.225282403	0.046391503	0.526022731	0.096256916	0.33132885	0.063631099	0.550038222	0.026497684	0.359832995	0.112015386	0.02965082	0	0	0.655166552	0.013678789	0.189488454
2. CVD Fall	1	Men	2015	81	0.851528305	0.016348808	0.000581076	0.033741404	0.040737584	0.002665139	0.054397686	0.797031191	0.047347955	0.057792721	0.027122277	0.070705856	0.698069639	0.093556649	0.060194605	0.148179106	0.023844103	0.745195753	0.070080366	0.013912043	0.146967735	0.080172	0.643770726	0.056945036	0.219112238	0.047395271	0.540774079	0.091283984	0.320546666	0.060936075	0.566003289	0.025432526	0.34762811	0.10516946	0.023771714	0.000613363	0.024539853	0.648116845	0.013158158	0.184630606
2. CVD Fall	1	Men	2015	82	0.838610506	0.014654953	0.000612718	0.039519007	0.050638689	0.002570225	0.053393902	0.814756437	0.034490926	0.055381195	0.026033019	0.069338424	0.70912872	0.088768092	0.057411012	0.144692176	0.019602192	0.748056145	0.075435337	0.013387422	0.143518904	0.070521739	0.662010738	0.05434555	0.213121974	0.043138985	0.560259126	0.086547173	0.310054716	0.055814293	0.584013862	0.024419086	0.335752759	0.114635557	0.031092574	0.001207842	0.036186169	0.624290025	0.012663812	0.179924021
2. CVD Fall	1	Men	2015	83	0.850853574	0.016919353	0.000540036	0.030390932	0.046374009	0.00248046	0.052441636	0.787045049	0.057540937	0.062380638	0.024997401	0.068035975	0.691296127	0.112616421	0.054758662	0.14132879	0.023229607	0.745023365	0.078664499	0.012889814	0.140192715	0.074068978	0.666750352	0.051868693	0.207311976	0.052507318	0.565597446	0.082039556	0.29985568	0.066769666	0.585563872	0.02345579	0.324210671	0.120488283	0.0254485	0.003944216	0.130246037	0.532309093	0.012194998	0.175368873
2. CVD Fall	1	Men	2015	84	0.847936275	0.019666767	0.000451954	0.022012413	0.055995284	0.002395718	0.051541588	0.793932283	0.057880175	0.057374504	0.024013825	0.066799213	0.702204863	0.107472267	0.052233567	0.138089303	0.022876291	0.730039112	0.097676596	0.012418473	0.136989528	0.077798364	0.671008093	0.049510726	0.201682817	0.046874257	0.58541878	0.077754454	0.289952509	0.061594706	0.602858318	0.022541155	0.313005821	0.108900862	0.027886385	0.003090071	0.096665403	0.58074076	0.011751016	0.170965504
2. CVD Fall	1	Men	2015	85	0.838054572	0.023128506	0.000493982	0.020417529	0.052770351	0.002897178	0.062237882	0.78126066	0.066285338	0.043006985	0.028874141	0.080572877	0.668121291	0.103830535	0.062339891	0.165708283	0.024487805	0.707666986	0.088465765	0.014977891	0.164401552	0.080453091	0.619495699	0.05913252	0.240918689	0.045118937	0.518515747	0.092180674	0.344184643	0.077787153	0.524157692	0.027113974	0.37094118	0.121497121	0.032670157	0.005996478	0.149084983	0.471900031	0.014175384	0.204675845
2. CVD Fall	1	Men	2015	86	0.771043511	0.026224798	0.002351017	0.079921936	0.056391268	0.002803316	0.061264154	0.740327285	0.092248573	0.060436917	0.027768363	0.079218862	0.658050562	0.120426873	0.059485313	0.162037251	0.035514955	0.690528246	0.098732486	0.01445142	0.160772894	0.096424255	0.612654062	0.056466981	0.234454701	0.036861115	0.543021522	0.087352704	0.332764659	0.068234144	0.547651289	0.026086381	0.358028186	0.109044052	0.045947857	0.003266131	0.063099779	0.565318053	0.013679705	0.199644422
2. CVD Fall	1	Men	2015	87	0.77854651	0.020003253	0.001660367	0.074982749	0.061733963	0.00271535	0.060357807	0.759765389	0.077309775	0.058253663	0.026722373	0.077948801	0.670772039	0.113931267	0.05677626	0.158520434	0.019021238	0.704732799	0.104993213	0.01395539	0.157297359	0.078921183	0.638925488	0.053937382	0.228215948	0.034910442	0.560590334	0.082779483	0.321719742	0.052473616	0.576867331	0.025114734	0.345544318	0.113377276	0.021627449	0.0165819	0.41739304	0.22300598	0.013212825	0.194801531
2. CVD Fall	1	Men	2015	88	0.793917028	0.022877378	0.001661508	0.066047683	0.053343067	0.002633178	0.059520157	0.7723316	0.054681507	0.070488274	0.025734598	0.076764021	0.651814011	0.138818735	0.054208536	0.155158717	0.026653733	0.676618835	0.129262476	0.013489118	0.153975838	0.060789139	0.665467335	0.051539808	0.222203718	0.050202104	0.56029066	0.07845348	0.311053756	0.068734394	0.573573749	0.024197584	0.333494273	0.107641186	0.036150031	0.009527304	0.19905106	0.444708215	0.012774104	0.190148099
2. CVD Fall	1	Men	2015	89	0.808032339	0.021019164	0.001014804	0.045041559	0.063582793	0.002556713	0.058752626	0.725973676	0.100415647	0.073141169	0.02480356	0.075665948	0.666343976	0.129924905	0.051778088	0.151953031	0.027928096	0.700623242	0.107587423	0.013051975	0.150809265	0.068096165	0.666214027	0.049270489	0.216419319	0.051892325	0.572970091	0.074367268	0.300770316	0.066340555	0.588443554	0.023333568	0.321882323	0.122278356	0.034597199	0.005976227	0.141317891	0.497782277	0.012362957	0.185685093
2. CVD Fall	1	Men	2015	90	0.696973843	0.024692358	0.002049424	0.074588104	0.076778299	0.004947808	0.119970163	0.642388598	0.077844932	0.077869773	0.047625122	0.154271574	0.44910473	0.144709886	0.098485095	0.307700289	0.038611842	0.524726614	0.106081249	0.025164923	0.305415372	0.065891004	0.404575973	0.093797371	0.435735652	0.051031631	0.207553085	0.14034741	0.601067874	0.070304494	0.24280493	0.044825759	0.642064817	0.129625176	0.032238523	0.01635406	0.320200599	0.102861234	0.023842256	0.374878151
2. CVD Fall	1	Men	2015	91	0.707678053	0.025044973	0.00179004	0.064915355	0.0770701	0.004817928	0.118683551	0.624994711	0.11553047	0.061114747	0.045989686	0.152370386	0.493031941	0.111070685	0.094170794	0.301726581	0.030507214	0.495964651	0.149602612	0.024407479	0.299518045	0.077597882	0.407900774	0.089769537	0.424731807	0.048763332	0.236693768	0.133125053	0.581417848	0.055330808	0.281457627	0.043310054	0.619901511	0.147540297	0.04686584	0.005364873	0.097350034	0.313299934	0.023130605	0.366448418
2. CVD Fall	1	Men	2015	92	0.667022419	0.028328903	0.003472733	0.105727085	0.073197944	0.004699056	0.117551861	0.605592359	0.125081548	0.074208609	0.044459276	0.150658207	0.491480765	0.122331584	0.09010679	0.296080862	0.041030744	0.502574008	0.138743851	0.023704889	0.293946508	0.06404084	0.435777647	0.085975726	0.414205787	0.049639816	0.261449067	0.126336211	0.562574906	0.05303216	0.306413384	0.041892869	0.598661587	0.128674167	0.051783696	0	0	0.438653616	0.022470948	0.358417573
2. CVD Fall	1	Men	2015	93	0.691381842	0.036618935	0.003378671	0.08109317	0.066357468	0.004591132	0.116578781	0.626993867	0.107649247	0.073186824	0.04303152	0.149138543	0.451676206	0.17127343	0.086285721	0.290764643	0.041665663	0.520389215	0.126186524	0.023056305	0.288702292	0.070555599	0.442876141	0.082409145	0.404159115	0.046021256	0.289470663	0.119966316	0.544541765	0.068128983	0.312951658	0.040572046	0.578347312	0.13317999	0.050033623	0.008138388	0.131763737	0.304234895	0.021862509	0.350786859
2. CVD Fall	1	Men	2015	94	0.659032152	0.037160339	0.003686282	0.086560637	0.093298328	0.004494126	0.115768136	0.56772757	0.164764753	0.077988582	0.041704146	0.147814948	0.519726067	0.111794525	0.082700304	0.285779105	0.047170815	0.500976262	0.145605355	0.022460965	0.283786603	0.060772317	0.465571928	0.079063088	0.394592667	0.037444932	0.321234986	0.114000741	0.527319341	0.05735881	0.344337004	0.039345529	0.558958657	0.121125498	0.038524745	0.004544718	0.10097593	0.369967464	0.021304597	0.343557049
2. CVD Fall	1	Men	2015	95	0.673478114	0.035099148	0.003258067	0.081682064	0.086950719	0.004408035	0.115123853	0.651727683	0.089255548	0.071850821	0.040474969	0.146690979	0.488495809	0.151035895	0.079343289	0.281125007	0.0597605	0.467796615	0.171324467	0.021918189	0.279200229	0.060490585	0.478071985	0.075930896	0.385506535	0.04680292	0.333865753	0.108424774	0.510906553	0.039927558	0.381368001	0.038211348	0.540493094	0.126361721	0.050680135	0.015682825	0.220636119	0.229114268	0.0207966	0.336728333
2. CVD Fall	1	Men	2015	96	0.620099827	0.036885457	0.00510957	0.116561264	0.102361065	0.004332887	0.114649931	0.552920687	0.180893117	0.081074185	0.039341871	0.14577014	0.458242529	0.188747449	0.076207437	0.276802584	0.059224041	0.474088244	0.170316904	0.021427368	0.274943443	0.060924956	0.489169229	0.073005924	0.376899891	0.026823143	0.374653098	0.103223605	0.495300154	0.057822122	0.38206483	0.037167598	0.52294545	0.112761788	0.047183378	0.029992653	0.358633875	0.100790129	0.020337979	0.3303002
2. CVD Fall	1	Men	2015	97	0.616223529	0.036006909	0.004917469	0.115242436	0.108990521	0.004268738	0.114350398	0.513737409	0.216307303	0.086596684	0.038302781	0.145055824	0.494344434	0.159558626	0.073285486	0.272811454	0.06828325	0.501170601	0.138542289	0.020987959	0.2710159	0.070863052	0.490084564	0.070281516	0.368770868	0.026676097	0.394446976	0.098382321	0.480494605	0.04975828	0.407721496	0.036212431	0.506307794	0.126341756	0.083033366	0.005745986	0.058976116	0.381703185	0.01992826	0.324271331
2. CVD Fall	1	Men	2015	98	0.540149881	0.034553265	0.007651042	0.173634771	0.125566098	0.004215676	0.114229267	0.483730171	0.262373206	0.071989712	0.037355659	0.144551253	0.549927951	0.11035141	0.070570126	0.269150513	0.05789864	0.507987792	0.146097543	0.020599479	0.267416546	0.066366302	0.504766274	0.067750979	0.361116445	0.049244372	0.390387727	0.093885917	0.466481984	0.041859251	0.432227335	0.035344028	0.490569386	0.134427551	0.052778398	0.023649082	0.285782579	0.165155865	0.019567029	0.318639495
2. CVD Fall	1	Men	2015	99	0.617704502	0.036189422	0.004211749	0.100036447	0.123393579	0.00417382	0.114290481	0.494672241	0.226533619	0.098036264	0.036498476	0.1442594	0.489220623	0.176907543	0.068053984	0.265817851	0.060355893	0.526640253	0.128598837	0.020261491	0.264143526	0.074338979	0.506321106	0.065407558	0.353932357	0.050409877	0.406618874	0.089719306	0.453251943	0.072049848	0.417672891	0.034560588	0.475716672	0.116943665	0.074398752	0.002617924	0.031373728	0.442010552	0.019253921	0.313401459
2. CVD Fall	1	Men	2015	100	0.448145753	0.036563379	0.013249807	0.252740138	0.130619746	0.004143317	0.11453786	0.501661352	0.216981024	0.101445508	0.035729195	0.144182921	0.497912715	0.173547013	0.065729605	0.262810666	0.073973053	0.468117682	0.176741571	0.019973598	0.261194096	0.06081095	0.528731601	0.063244427	0.347213021	0.038230262	0.435110679	0.08586735	0.440791709	0.059306589	0.44509977	0.033860308	0.461733333	0.117939883	0.065067707	0.007088386	0.091148451	0.391214057	0.018988612	0.308552904
2. CVD Fall	1	Men	2016	35	0.99218409	0.001781838	0	0	0.003113834	0.000136086	0.002784151	0.981997504	0	0.012863246	0.001477131	0.003662118	0.968256395	0.020003687	0.00360274	0.008137177	0	0.991205571	0	0.00073137	0.008063059	0.040154371	0.943735212	0.003375427	0.01273499	0	0.973648402	0.006023874	0.020327724	0	0.976026554	0.001378761	0.022594685	0.067008055	0.003238605	0	0	0.918628256	0.00069037	0.010434714
2. CVD Fall	1	Men	2016	36	0.992721641	0.001504904	0	0	0.002926807	0.000130434	0.002716214	0.971367848	0	0.02364401	0.001415501	0.003572641	0.9661766	0.022435001	0.003451351	0.007937048	0	0.991434294	0	0.000700932	0.007864774	0.060724474	0.92362216	0.003233697	0.012419669	0	0.974412451	0.005768707	0.019818842	0	0.976651539	0.001321254	0.022027207	0.080636751	0.003698606	0	0	0.904825788	0.000661642	0.010177214
2. CVD Fall	1	Men	2016	37	0.991620023	0.002421435	0	0	0.003183582	0.000125017	0.002649943	0.975134549	0	0.020023671	0.001356427	0.003485353	0.98445428	0.004497761	0.003306212	0.007741747	0	0.991656968	0	0.000671758	0.007671274	0.094389678	0.89040065	0.003097822	0.012111851	0	0.975154177	0.005524021	0.019321802	0	0.977261019	0.001266133	0.021472848	0.072223124	0.002900497	0	0	0.914316389	0.000634107	0.009925882
2. CVD Fall	1	Men	2016	38	0.991690831	0.002465319	0	0	0.003138726	0.000119825	0.002585298	0.968959784	0	0.026340212	0.001299804	0.0034002	0.953967896	0.035313887	0.003167062	0.007551154	0	0.991873763	0	0.000643796	0.00748244	0.09135525	0.893865849	0.002967556	0.011811345	0	0.975874327	0.00528938	0.018836293	0	0.977855441	0.001213299	0.02093126	0.07896948	0.004930473	0	0	0.905811763	0.000607717	0.009680566
2. CVD Fall	1	Men	2016	39	0.990796833	0.002393794	0	0	0.004172284	0.000114849	0.00252224	0.982165926	0	0.013271415	0.001245528	0.003317131	0.966963619	0.022637573	0.003033653	0.007365155	0	0.992084845	0	0.000616997	0.007298158	0.079816579	0.905822786	0.002842667	0.011517968	0	0.976573627	0.005064363	0.01836201	0	0.978435241	0.001162656	0.020402103	0.06159259	0.005416753	0	0	0.922967118	0.000582423	0.009441115
2. CVD Fall	1	Men	2016	40	0.991308778	0.002075599	0	0	0.002755016	0.000236353	0.003624254	0.976820597	0	0.015850613	0.00256255	0.00476624	0.965708845	0.017471967	0.006238872	0.010580315	0	0.988246297	0	0.001269592	0.010484111	0.077374033	0.900237401	0.005846356	0.016542211	0	0.963227942	0.010410278	0.02636178	0	0.968320507	0.002392094	0.029287399	0.076017466	0.006240367	0	0	0.902982744	0.001198461	0.013560962
2. CVD Fall	1	Men	2016	41	0.988450853	0.002408234	0	0	0.00537848	0.00022654	0.003535892	0.979702784	0	0.013191919	0.00245548	0.004649817	0.968439482	0.015265552	0.005975562	0.010319403	0	0.988557654	0	0.001216735	0.010225612	0.095910557	0.882359249	0.005599875	0.016130319	0	0.964339067	0.009965929	0.025695004	0	0.969164616	0.002292194	0.02854319	0.080338773	0.00377577	0	0	0.901511958	0.001148574	0.013224924
2. CVD Fall	1	Men	2016	42	0.989295745	0.002716512	0	0	0.004320899	0.000217137	0.003449707	0.974856353	0	0.018254546	0.002352851	0.00453625	0.945082123	0.039130007	0.0057231	0.01006477	0	0.988860591	0	0.001166074	0.009973335	0.065269534	0.913638762	0.005363556	0.015728148	0	0.965416756	0.009539766	0.025043478	0	0.969987715	0.002196437	0.027815848	0.070878336	0.005403424	0	0	0.909720584	0.001100762	0.012896894
2. CVD Fall	1	Men	2016	43	0.988479247	0.002425848	0	0	0.005521134	0.000208125	0.003365647	0.975338261	0	0.017981789	0.002254477	0.004425473	0.957893096	0.026809608	0.005481035	0.009816261	0	0.989155352	0	0.001117519	0.009727129	0.09816903	0.881358545	0.005136976	0.015335448	0	0.966462178	0.009131028	0.024406794	0	0.970790432	0.002104653	0.027104915	0.089442116	0.004532082	0	0	0.892394194	0.001054937	0.012576671
2. CVD Fall	1	Men	2016	44	0.988267772	0.002606617	0	0	0.005642459	0.000199489	0.003283663	0.958911676	0	0.034610721	0.002160183	0.00431742	0.975550373	0.009626967	0.005248934	0.009573727	0	0.989442173	0	0.001070984	0.009486843	0.077160349	0.90296794	0.00491973	0.01495198	0	0.967476456	0.008738991	0.023784552	0	0.97157338	0.002016675	0.026409944	0.078773884	0.005503432	0	0	0.902447605	0.001011018	0.01226406
2. CVD Fall	1	Men	2016	45	0.986206943	0.002938677	0	0	0.00597864	0.000339543	0.004536197	0.967284758	0	0.023075936	0.003675409	0.005963897	0.971826312	0.006027691	0.008925513	0.013220484	0	0.985076841	0	0.001822583	0.013100575	0.060398332	0.910594828	0.00836624	0.020640601	0	0.952333721	0.014850379	0.032815899	0	0.960136315	0.003431334	0.036432351	0.066748909	0.006361385	0	0	0.908236336	0.001720555	0.016932816
2. CVD Fall	1	Men	2016	46	0.985064914	0.003114198	0	0	0.007069635	0.00032546	0.004425792	0.970177647	0	0.020482438	0.003521566	0.005818348	0.944154694	0.034405353	0.008546574	0.01289338	0	0.985476809	0	0.00174668	0.012776511	0.064604032	0.907261597	0.008011578	0.020122793	0	0.953816007	0.01420988	0.031974113	0	0.961220509	0.003287803	0.035491688	0.064530304	0.005508248	0	0	0.911801587	0.001648921	0.016510941
2. CVD Fall	1	Men	2016	47	0.98637405	0.002892618	0	0	0.006103237	0.000311965	0.00431813	0.97362686	0	0.017322642	0.003374104	0.005676394	0.964055417	0.015187239	0.008183211	0.012574133	0	0.985865831	0	0.001673936	0.012460234	0.073689086	0.899022322	0.007671508	0.019617084	0	0.955253356	0.013595482	0.031151162	0	0.96227796	0.003150227	0.034571813	0.077798879	0.007058574	0	0	0.897463221	0.001580268	0.016099058
2. CVD Fall	1	Men	2016	48	0.985865116	0.00297114	0	0	0.006651564	0.000299033	0.004213147	0.965229822	0	0.025999468	0.003232757	0.005537953	0.952109949	0.027792721	0.007834779	0.012262552	0	0.986244226	0	0.001604219	0.012151555	0.077686944	0.895844466	0.007345424	0.019123166	0	0.956647367	0.013006099	0.030346534	0	0.963309487	0.00301836	0.033672153	0.081800353	0.007001763	0	0	0.89398649	0.001514474	0.01569692
2. CVD Fall	1	Men	2016	49	0.984949835	0.003535118	0	0	0.007117621	0.000286641	0.004110785	0.966699223	0	0.024800559	0.003097274	0.005402944	0.947649502	0.03289139	0.007500656	0.011958452	0	0.986612302	0	0.001537406	0.011850293	0.064940978	0.909385538	0.007032745	0.018640739	0	0.957999577	0.012440692	0.02955973	0	0.964315886	0.002891966	0.032792148	0.08448648	0.006085023	0	0	0.892672792	0.00145142	0.015304285
2. CVD Fall	1	Men	2016	50	0.974303474	0.003780896	2.99E-05	0.007809634	0.00783585	0.000446481	0.005793791	0.948812934	0.019588056	0.019162859	0.00482187	0.007614281	0.937603311	0.033884163	0.011667484	0.016845042	0.004676072	0.962090608	0.014146358	0.002394149	0.016692813	0.067011028	0.895802861	0.010940593	0.026245518	0.074899961	0.864179055	0.019333984	0.041586999	0.076981159	0.872392326	0.004502417	0.046124098	0.076301482	0.006752423	0.000121974	0.017621279	0.875389573	0.002260282	0.021552987
2. CVD Fall	1	Men	2016	51	0.977594668	0.00434508	1.71E-05	0.003907622	0.008054266	0.000427994	0.00565325	0.959351739	0.0049946	0.023605204	0.004619608	0.007428849	0.968075397	0.004329777	0.011168207	0.016426619	0.005630934	0.964469961	0.011326359	0.002294441	0.016278306	0.074482182	0.88946381	0.010473403	0.025580606	0.03464342	0.906368328	0.01848837	0.040499883	0.120260775	0.830518102	0.004313733	0.04490739	0.077642058	0.006846928	4.69E-06	0.000680395	0.89164746	0.002166187	0.021012279
2. CVD Fall	1	Men	2016	52	0.981359411	0.003872671	3.44E-06	0.000882942	0.007955008	0.000410281	0.00551625	0.950893604	0.012225783	0.02520682	0.004425742	0.007248053	0.941366161	0.031926181	0.010689409	0.016018249	0.004843294	0.96660163	0.010482422	0.002198891	0.015873762	0.06051893	0.904524609	0.010025398	0.024931063	0.076278936	0.866607529	0.017677069	0.039436466	0.095224008	0.85692633	0.004132885	0.043716777	0.084015622	0.008643165	5.28E-05	0.006015868	0.878712246	0.002076017	0.020484309
2. CVD Fall	1	Men	2016	53	0.97732123	0.004763694	1.34E-05	0.00278428	0.009341404	0.000393311	0.005382716	0.957797555	0.006093973	0.024796757	0.004239925	0.00707179	0.954461786	0.019688277	0.010230245	0.015619693	0.005684624	0.967018431	0.009710668	0.002107329	0.015478948	0.082090888	0.884016823	0.009595786	0.024296503	0.066870504	0.877834728	0.016898666	0.038396102	0.084208572	0.86928034	0.003959552	0.042551536	0.085350369	0.00957237	0.00011287	0.011540956	0.871465058	0.001989611	0.019968767
2. CVD Fall	1	Men	2016	54	0.977819759	0.004989085	1.05E-05	0.002082654	0.009468411	0.000377053	0.005252574	0.964857987	0.001494781	0.022685441	0.004061828	0.006899964	0.943791202	0.031188174	0.009789902	0.015230722	0.007151751	0.961627041	0.014107981	0.002019591	0.015093637	0.085810581	0.881329062	0.009183806	0.023676551	0.061302697	0.885167332	0.016151804	0.037378166	0.076193998	0.878601609	0.003793425	0.041410968	0.080562549	0.008844697	0	0	0.88922059	0.001906815	0.01946535
2. CVD Fall	1	Men	2016	55	0.968724874	0.005174332	3.86E-05	0.007368536	0.010038185	0.00058299	0.008072469	0.953754045	0.001268879	0.028098592	0.006275608	0.010602876	0.919278257	0.042224911	0.01510805	0.023388783	0.006697623	0.954575999	0.01242625	0.003121603	0.023178525	0.07607517	0.873416483	0.014174446	0.0363339	0.067861084	0.849947573	0.024893831	0.057297511	0.083617192	0.847062572	0.005861239	0.063458997	0.089982959	0.010368789	0	0	0.866819414	0.002947356	0.029881483
2. CVD Fall	1	Men	2016	56	0.968107743	0.005366099	3.41E-05	0.006288583	0.011766633	0.000558927	0.00787787	0.957061188	0.003489815	0.02309143	0.006011759	0.010345808	0.920248639	0.042491128	0.014454878	0.022805355	0.007316088	0.952830306	0.01426131	0.002991688	0.022600609	0.07343876	0.877595964	0.013563418	0.035401858	0.109257196	0.811195752	0.023784857	0.055762195	0.084602527	0.848045046	0.005615139	0.061737288	0.08866456	0.009663184	0.00031922	0.031659051	0.837743731	0.002824763	0.029125491
2. CVD Fall	1	Men	2016	57	0.965058225	0.005162321	5.04E-05	0.009617264	0.011887621	0.000535878	0.007688297	0.951327054	0.009905282	0.02291347	0.00575889	0.010095303	0.925911568	0.038023954	0.013828467	0.022236011	0.006137649	0.949746455	0.019212025	0.002867216	0.022036655	0.05769838	0.894833002	0.01297746	0.034491157	0.072387231	0.850632578	0.022720755	0.054259436	0.07822986	0.856339502	0.005379289	0.06005135	0.074915373	0.010755447	0.000256283	0.023017369	0.859960961	0.002707306	0.028387262
2. CVD Fall	1	Men	2016	58	0.964471579	0.00541042	4.93E-05	0.008982656	0.013068581	0.000513801	0.007503651	0.93470877	0.022575599	0.027347847	0.005516554	0.00985123	0.902075365	0.063016479	0.013227721	0.021680436	0.008947627	0.948514764	0.018303292	0.002747964	0.021486353	0.067510983	0.886472191	0.012415547	0.03360128	0.064807978	0.860703945	0.0216997	0.052788377	0.099134665	0.837311835	0.005153271	0.058400229	0.093217965	0.011860566	4.87E-06	0.000405152	0.864250293	0.002594779	0.027666381
2. CVD Fall	1	Men	2016	59	0.964634011	0.00575393	4.79E-05	0.008213396	0.013534233	0.000492658	0.007323842	0.93957851	0.015990776	0.029532929	0.00528432	0.009613465	0.930802778	0.035407303	0.012651592	0.021138327	0.008210258	0.952749794	0.015456823	0.002633722	0.020949403	0.065073151	0.890318428	0.011876694	0.032731726	0.045577379	0.882354474	0.020719951	0.051348195	0.075884585	0.862395715	0.004936685	0.056783014	0.085994121	0.010147722	3.44E-05	0.003347114	0.871027183	0.00248698	0.026962448
2. CVD Fall	1	Men	2016	60	0.966890071	0.005604145	1.41E-05	0.002493384	0.012548216	0.000752863	0.011697232	0.930216076	0.01775851	0.028607492	0.008066752	0.01535117	0.896759664	0.050236284	0.01928181	0.033722242	0.00607376	0.936030243	0.020451771	0.004022853	0.033421374	0.076605461	0.853123491	0.018103915	0.052167133	0.052715031	0.834051121	0.031522336	0.081711511	0.08668201	0.815461929	0.007536651	0.09031941	0.095544039	0.010592712	0.00017842	0.01638623	0.83050701	0.003798837	0.042992751
2. CVD Fall	1	Men	2016	61	0.959180645	0.005990975	4.72E-05	0.007762551	0.014878289	0.000721967	0.011418418	0.944789665	0.002557173	0.029944048	0.007726919	0.014982194	0.911238228	0.037446494	0.018437398	0.032877879	0.007849985	0.935032124	0.020676996	0.003855802	0.032585093	0.064020549	0.867856698	0.017314249	0.050808504	0.060817321	0.829645659	0.030084775	0.079452245	0.094669331	0.810330942	0.007219745	0.087779983	0.085277626	0.010441856	0	0	0.858744764	0.003641216	0.041894538
2. CVD Fall	1	Men	2016	62	0.959553486	0.005718425	3.92E-05	0.006770188	0.016079201	0.000692387	0.011147107	0.93880454	0.00784619	0.031324973	0.007401311	0.014622986	0.887444368	0.062873809	0.017627636	0.032054186	0.008270247	0.932130576	0.02413406	0.003695808	0.031769309	0.07430441	0.859657683	0.016557042	0.049480865	0.044478914	0.849575818	0.028705452	0.077239816	0.094383706	0.813408205	0.006916119	0.08529197	0.088790747	0.013006526	0.000187869	0.014050685	0.839651672	0.003490256	0.040822245
2. CVD Fall	1	Men	2016	63	0.955822035	0.006636216	5.83E-05	0.008648108	0.017288108	0.00066407	0.010883178	0.933164916	0.0119991	0.033473247	0.007089356	0.01427338	0.909124733	0.042773388	0.01685113	0.031250748	0.008381372	0.930971875	0.026130553	0.003542588	0.030973611	0.068520482	0.867465005	0.015830987	0.048183526	0.042567388	0.854977429	0.027382066	0.075073117	0.077265333	0.833255261	0.00662524	0.082854166	0.088004627	0.012741932	0.000196373	0.014981261	0.840954797	0.003345692	0.039775319
2. CVD Fall	1	Men	2016	64	0.957845302	0.006582487	5.25E-05	0.007855112	0.016401147	0.000636968	0.010626518	0.923040681	0.01736315	0.038872438	0.006790509	0.013933222	0.899951829	0.05347445	0.016106551	0.03046717	0.008759935	0.935893561	0.02175302	0.003395875	0.03019761	0.068741393	0.869207939	0.015134838	0.04691583	0.085564864	0.815371597	0.02611243	0.072951109	0.093854389	0.819333571	0.006346598	0.080465442	0.100037721	0.013172695	0.000186579	0.01377968	0.83086282	0.00320727	0.038753234
2. CVD Fall	1	Men	2016	65	0.951275314	0.006753103	5.60E-05	0.008168176	0.017071523	0.000908643	0.015767242	0.922270929	0.012128334	0.035260556	0.009672225	0.020667956	0.864908216	0.067069986	0.022889809	0.04513199	0.008442263	0.918956578	0.023026482	0.004840999	0.044733677	0.070129421	0.838953033	0.02151394	0.069403606	0.067465214	0.787828296	0.037019626	0.107686864	0.08367636	0.788577008	0.009040907	0.118705725	0.093642148	0.012979126	0.000308944	0.022940804	0.808189504	0.004572344	0.057367131
2. CVD Fall	1	Men	2016	66	0.94769072	0.006846986	6.40E-05	0.009201438	0.019926195	0.000871741	0.015398887	0.921441443	0.013647166	0.035467706	0.009264511	0.020179174	0.867946657	0.066181319	0.021871952	0.044000072	0.009422293	0.910292463	0.032031409	0.004641045	0.04361279	0.078080879	0.833791975	0.020562437	0.067564708	0.065420662	0.794702946	0.035282304	0.104594088	0.079282127	0.796836355	0.008660807	0.115220711	0.099190003	0.012949318	0	0	0.827589587	0.004383703	0.055887389
2. CVD Fall	1	Men	2016	67	0.945821624	0.007744815	7.96E-05	0.010088251	0.020388177	0.000836441	0.015041135	0.924468122	0.010380715	0.036572959	0.008874066	0.019704138	0.884550259	0.051656851	0.020896168	0.042896723	0.009642387	0.911051232	0.032336471	0.00444967	0.042520239	0.065107949	0.849473549	0.019650337	0.065768165	0.053048239	0.811770599	0.033616057	0.101565106	0.086469979	0.793427303	0.008296832	0.111805886	0.093854444	0.012977182	0.00025126	0.018742663	0.81552805	0.004203161	0.054443239
2. CVD Fall	1	Men	2016	68	0.943691609	0.00772757	8.44E-05	0.010723122	0.022276721	0.000802683	0.014693867	0.911521911	0.020081312	0.040653887	0.008500216	0.019242675	0.874318508	0.063899199	0.019960821	0.041821471	0.010775304	0.910041803	0.033460792	0.004266541	0.041455559	0.067539518	0.849671188	0.018776105	0.06401319	0.064309814	0.805073199	0.032018217	0.09859877	0.081463732	0.802127858	0.007948352	0.108460058	0.093825743	0.013160259	0.000214457	0.015820087	0.819915	0.004030406	0.053034049
2. CVD Fall	1	Men	2016	69	0.944438296	0.007283544	8.75E-05	0.011781762	0.021281529	0.000770407	0.014356974	0.913572529	0.015321519	0.044169003	0.008142318	0.018794631	0.871034346	0.069127419	0.019064354	0.040773881	0.010752693	0.906790021	0.037947626	0.004091342	0.040418319	0.079321016	0.840441655	0.017938278	0.062299051	0.061737763	0.812081935	0.030486254	0.095694049	0.054378197	0.832824864	0.007614768	0.105182172	0.105819145	0.014986848	0	0	0.823669642	0.003865137	0.051659228
2. CVD Fall	1	Men	2016	70	0.930433375	0.007983658	0.000106741	0.013086774	0.024070652	0.001259883	0.023058917	0.896718106	0.016551792	0.043268258	0.013287377	0.030174467	0.827457016	0.076194154	0.031013832	0.065334998	0.012405309	0.876601022	0.039541998	0.006684389	0.064767283	0.069114063	0.802057233	0.02919133	0.099637374	0.038183389	0.759783924	0.049433567	0.152599119	0.084444811	0.735536869	0.012428352	0.167589968	0.096731028	0.014476168	0.000241931	0.016195692	0.783341886	0.006315228	0.082698067
2. CVD Fall	1	Men	2016	71	0.926101819	0.008362734	0.000133694	0.015601625	0.026051556	0.001209671	0.022538901	0.897787717	0.020821904	0.039179859	0.012728945	0.029481574	0.845374294	0.06131178	0.029611651	0.063702275	0.008585027	0.88416008	0.037692604	0.006411427	0.063150863	0.068416113	0.806751621	0.027881076	0.09695119	0.047543495	0.75739692	0.047036146	0.148023439	0.071093934	0.754576272	0.011907947	0.162421847	0.091838396	0.015580968	0	0	0.805973963	0.006057762	0.080548912
2. CVD Fall	1	Men	2016	72	0.927023852	0.008909653	0.0001375	0.015060649	0.025671086	0.001161714	0.022035547	0.895032984	0.020689193	0.043272967	0.012194705	0.028810151	0.85022874	0.059389577	0.028268487	0.062113197	0.012137027	0.878421727	0.041712996	0.006150506	0.061577744	0.0651247	0.813920147	0.026626064	0.094329089	0.062422423	0.749293158	0.044739285	0.143545133	0.067503389	0.763724841	0.011410134	0.157361636	0.108793129	0.017031793	0	0	0.789909629	0.005811667	0.078453782
2. CVD Fall	1	Men	2016	73	0.918966662	0.009189156	0.000192921	0.020369782	0.028616774	0.001115932	0.021548774	0.888596191	0.029276095	0.042283894	0.011683757	0.028160063	0.8318773	0.080573259	0.026982166	0.060567275	0.011494725	0.878415572	0.044141074	0.005901184	0.060047444	0.071378192	0.8114273	0.025424253	0.091770255	0.055079124	0.76321807	0.04253949	0.139163316	0.076059375	0.760597977	0.010934074	0.152408574	0.098896602	0.018161409	0.000420435	0.022205706	0.778327314	0.005576525	0.076412009
2. CVD Fall	1	Men	2016	74	0.922027656	0.009720971	0.00015266	0.015308769	0.030639171	0.001072247	0.021078525	0.887144866	0.028939606	0.045189076	0.011195244	0.027531207	0.855067141	0.060118156	0.025750625	0.059064077	0.015236431	0.881890465	0.038650523	0.005663043	0.058559539	0.074732975	0.811719349	0.024273704	0.089273972	0.059094016	0.765595225	0.040433449	0.13487731	0.074783921	0.767174962	0.010478969	0.147562148	0.100149442	0.016647307	0.001224252	0.067278537	0.73492552	0.005351942	0.074422999
2. CVD Fall	1	Men	2016	75	0.89639435	0.009765858	0.00022962	0.022742788	0.034130325	0.001805482	0.034931577	0.874961611	0.017628351	0.043015494	0.018794973	0.045599571	0.776384929	0.083006703	0.043047441	0.097560928	0.015175681	0.82546203	0.053107782	0.009522755	0.09673175	0.065210759	0.747115522	0.040595961	0.147077758	0.03781524	0.673540163	0.067304412	0.221340184	0.072001092	0.668509115	0.017596157	0.241893636	0.107110136	0.018573082	0.000283693	0.014760935	0.727503871	0.009000442	0.122767841
2. CVD Fall	1	Men	2016	76	0.901229323	0.011459746	0.000213608	0.018085196	0.033085201	0.001735926	0.034191	0.853798536	0.034697077	0.048884715	0.018013566	0.044606106	0.795326065	0.06844427	0.041071722	0.095157943	0.015064949	0.830418751	0.05102006	0.009142674	0.094353566	0.062292596	0.755898183	0.038750415	0.143058806	0.05168485	0.669984418	0.063927126	0.214403606	0.080502945	0.668583047	0.016868367	0.234045641	0.102909089	0.021527855	5.65E-05	0.002562593	0.744726524	0.008642052	0.119575355
2. CVD Fall	1	Men	2016	77	0.890313435	0.011322282	0.000290896	0.024757855	0.038167452	0.001669684	0.033478397	0.850273502	0.039943318	0.048867367	0.01726741	0.043648403	0.791405523	0.076586552	0.039182192	0.092825733	0.011358787	0.832504245	0.055311152	0.008780197	0.092045618	0.076006516	0.747864821	0.036985483	0.13914318	0.059908027	0.671765599	0.060698423	0.20762795	0.074995386	0.68245301	0.016173507	0.226378097	0.1004845	0.020930974	0	0	0.753814228	0.00830029	0.116470008
2. CVD Fall	1	Men	2016	78	0.896126329	0.011115249	0.0002575	0.02238432	0.035716094	0.00160665	0.032793859	0.86777666	0.022402256	0.050539281	0.016555292	0.04272651	0.794215731	0.077844382	0.03737592	0.090563967	0.01635083	0.82073517	0.064671681	0.008434736	0.089807583	0.066846439	0.762524806	0.035298408	0.135330347	0.062731836	0.678641121	0.057613605	0.201013438	0.073479692	0.692118136	0.015510446	0.218891726	0.113912735	0.023969211	0	0	0.740692133	0.007974603	0.113451318
2. CVD Fall	1	Men	2016	79	0.886369717	0.012184861	0.000343649	0.027085731	0.040331793	0.001546724	0.032137525	0.852223646	0.03960525	0.050454508	0.015876065	0.041840531	0.784418565	0.091558896	0.035650125	0.088372414	0.016710076	0.833302924	0.054242033	0.008105734	0.087639234	0.075666332	0.759027154	0.033686579	0.131619935	0.063066834	0.68770436	0.054668202	0.194560603	0.048242027	0.725292256	0.014878115	0.211587602	0.107333126	0.02156072	0.001561115	0.065955796	0.685405848	0.007664464	0.110518931
2. CVD Fall	1	Men	2016	80	0.857447551	0.014341352	0.000494583	0.032842247	0.036847104	0.002716592	0.055310571	0.812778033	0.040831785	0.046668398	0.027768589	0.071953195	0.697271499	0.089326225	0.062001085	0.151401191	0.017340047	0.767236707	0.051059733	0.014209501	0.150154012	0.075341314	0.641333171	0.058619221	0.224706294	0.046391503	0.528566819	0.094560128	0.33048155	0.063631099	0.551425508	0.026030591	0.358912803	0.112015386	0.028076535	0	0	0.657466536	0.013437663	0.189003879
2. CVD Fall	1	Men	2016	81	0.853476434	0.015513475	0.000535984	0.032859788	0.040737584	0.002618158	0.054258576	0.798968504	0.04606956	0.057792721	0.026644173	0.070525041	0.699509667	0.093556649	0.059133513	0.147800171	0.022604111	0.74705682	0.070080366	0.013666805	0.146591898	0.080172	0.645334867	0.055941226	0.218551908	0.047395271	0.543202933	0.089674857	0.319726939	0.060936075	0.567340587	0.024984209	0.346739129	0.10516946	0.022551186	0.000565766	0.023908314	0.65072061	0.01292621	0.184158454
2. CVD Fall	1	Men	2016	82	0.84060221	0.013928656	0.000565989	0.038482179	0.050638689	0.002524918	0.053257359	0.816323911	0.033559671	0.055381195	0.025574116	0.069161106	0.710510762	0.088768092	0.056398987	0.144322158	0.018609703	0.749651641	0.075435337	0.013151433	0.143151886	0.070521739	0.663513737	0.053387562	0.212576962	0.043138985	0.562577649	0.085021546	0.30926182	0.055814293	0.585302927	0.023988634	0.334894146	0.114635557	0.02954927	0.001115727	0.035268646	0.627526316	0.012440578	0.179463905
2. CVD Fall	1	Men	2016	83	0.852681203	0.016104693	0.000499724	0.029596108	0.046374009	0.002436735	0.052307528	0.789213288	0.055987332	0.062380638	0.024556754	0.067861988	0.692622813	0.112616421	0.053793392	0.140967373	0.022092072	0.74674663	0.078664499	0.012662597	0.139834203	0.074068978	0.668194832	0.050954367	0.206781822	0.052507318	0.567810429	0.080593387	0.299088866	0.066769666	0.58680644	0.023042319	0.323381575	0.120488283	0.024303586	0.003649792	0.126917324	0.53774058	0.011980029	0.174920406
2. CVD Fall	1	Men	2016	84	0.849630612	0.018753006	0.00041906	0.02143877	0.055995284	0.002353487	0.051409782	0.79608918	0.05631741	0.057374504	0.023590517	0.066628389	0.703478753	0.107472267	0.051312809	0.13773617	0.021799882	0.731684751	0.097676596	0.012199564	0.136639207	0.077798364	0.672396613	0.048637965	0.201167058	0.046874257	0.587530901	0.076383822	0.28921102	0.061594706	0.604056109	0.022143807	0.312205378	0.108900862	0.02665374	0.002865166	0.09419691	0.585311152	0.011543873	0.170528297
2. CVD Fall	1	Men	2016	85	0.839830349	0.022102088	0.000459049	0.019887851	0.052770351	0.002841334	0.062108978	0.783773805	0.064495634	0.043006985	0.028317578	0.080405999	0.669666128	0.103830535	0.06113826	0.165365077	0.023387577	0.709396421	0.088465765	0.014689185	0.164061053	0.080453091	0.621134484	0.057992713	0.240419711	0.045118937	0.521005429	0.090403847	0.343471786	0.077787153	0.5254486	0.02659134	0.370172907	0.121497121	0.031356929	0.005572428	0.145321834	0.47809761	0.013902147	0.204251932
2. CVD Fall	1	Men	2016	86	0.774563449	0.025107152	0.002184761	0.077866822	0.056391268	0.002749281	0.061137267	0.743517319	0.089757861	0.060436917	0.027233115	0.079054788	0.659532773	0.120426873	0.058338706	0.161701648	0.03391928	0.692735463	0.098732486	0.014172862	0.16043991	0.096424255	0.61422808	0.055378553	0.233969111	0.036861115	0.545394491	0.085668939	0.332075455	0.068234144	0.548895645	0.025583554	0.357286658	0.109044052	0.043967659	0.003035162	0.061538869	0.569767306	0.013416023	0.19923093
2. CVD Fall	1	Men	2016	87	0.781649147	0.019147329	0.001542952	0.0730308	0.061733963	0.00266301	0.060232798	0.762529282	0.075222411	0.058253663	0.026207286	0.077787358	0.672194747	0.113931267	0.055681871	0.158192115	0.018166621	0.706182199	0.104993213	0.013686393	0.156971574	0.078921183	0.640437825	0.052897713	0.227743279	0.034910442	0.562852276	0.081183869	0.321053413	0.052473616	0.578067102	0.024630636	0.344828646	0.113377276	0.02108333	0.015409285	0.406848332	0.235925567	0.012958142	0.194398068
2. CVD Fall	1	Men	2016	88	0.796904234	0.021892351	0.001544012	0.064337031	0.053343067	0.002582422	0.059396882	0.774463037	0.053205106	0.070488274	0.025238551	0.076605031	0.653180262	0.138818735	0.053163641	0.154837361	0.02545619	0.678395293	0.129262476	0.013229109	0.153656932	0.060789139	0.666921005	0.050546354	0.221743502	0.050202104	0.562447125	0.076941252	0.310409518	0.068734394	0.574730884	0.023731164	0.332803558	0.107641186	0.034771502	0.008853566	0.194093182	0.452358411	0.012527878	0.189754275
2. CVD Fall	1	Men	2016	89	0.810365043	0.020100949	0.000943041	0.043869801	0.063582793	0.002507431	0.058630941	0.729319714	0.097704424	0.073141169	0.02432546	0.075509233	0.66765674	0.129924905	0.05078004	0.151638315	0.026673296	0.702441973	0.107587423	0.012800392	0.150496917	0.068096165	0.667611975	0.048320777	0.215971083	0.051892325	0.575026494	0.072933803	0.300147377	0.066340555	0.589559985	0.022883803	0.321215658	0.122278356	0.033196867	0.005553609	0.137763568	0.503782433	0.012124655	0.185300512
2. CVD Fall	1	Men	2016	90	0.700376245	0.023635787	0.001904496	0.072663819	0.076778299	0.004841934	0.119799419	0.645729064	0.075743119	0.077869773	0.046606032	0.154052012	0.451650055	0.144709886	0.096377695	0.307262364	0.036877026	0.527434587	0.106081249	0.02462644	0.304980699	0.065891004	0.407203212	0.09179028	0.435115504	0.051031631	0.211411714	0.137344233	0.600212422	0.070304494	0.244677918	0.043866571	0.641151017	0.129625176	0.031211777	0.015197557	0.312270127	0.11401867	0.023332076	0.374344617
2. CVD Fall	1	Men	2016	91	0.710830208	0.023965871	0.001663455	0.063240895	0.0770701	0.004714833	0.118514638	0.629314985	0.112411147	0.061114747	0.045005591	0.152153529	0.495476446	0.111070685	0.092155712	0.301297157	0.029136535	0.498283885	0.149602612	0.023885204	0.299091764	0.077597882	0.410426164	0.087848635	0.42412732	0.048763332	0.240369884	0.130276422	0.580590362	0.055330808	0.283266639	0.042383298	0.619019255	0.147540297	0.044898517	0.004985487	0.094956117	0.319057048	0.022635653	0.365926881
2. CVD Fall	1	Men	2016	92	0.671421925	0.027145646	0.003227153	0.103024269	0.073197944	0.004598504	0.117384559	0.610135328	0.121704346	0.074208609	0.04350793	0.150443787	0.493830272	0.122331584	0.08817867	0.295659474	0.039187247	0.505343097	0.138743851	0.023197648	0.293528158	0.06404084	0.438206876	0.084136003	0.413616281	0.049639816	0.264953097	0.123632849	0.561774238	0.05303216	0.308161842	0.040996438	0.59780956	0.128674167	0.049457073	0	0	0.441971184	0.021990111	0.357907466
2. CVD Fall	1	Men	2016	93	0.695484892	0.035060784	0.003139743	0.079051358	0.066357468	0.00449289	0.116412864	0.631033448	0.104742717	0.073186824	0.042110725	0.148926286	0.453936383	0.17127343	0.084439366	0.29035082	0.039793639	0.523165489	0.126186524	0.022562942	0.288291405	0.070555599	0.445214752	0.080645741	0.403583907	0.046021256	0.292812724	0.117399258	0.543766762	0.068128983	0.314642941	0.039703879	0.577524197	0.13317999	0.047995493	0.007562869	0.128561898	0.311017447	0.021394691	0.350287612
2. CVD Fall	1	Men	2016	94	0.663304292	0.035585795	0.0034256	0.084384651	0.093298328	0.00439796	0.115603372	0.573278984	0.160316105	0.077988582	0.040811754	0.147604575	0.521902428	0.111794525	0.080930669	0.285372378	0.045051447	0.503980145	0.145605355	0.021980342	0.283382712	0.060772317	0.467825325	0.077371284	0.394031075	0.037444932	0.324424884	0.111561335	0.526568849	0.05735881	0.345974448	0.038503607	0.558163135	0.121125498	0.036911035	0.004223331	0.098448259	0.375375068	0.020848717	0.343068092
2. CVD Fall	1	Men	2016	95	0.677522646	0.033606171	0.003027668	0.07961908	0.086950719	0.004313711	0.114960006	0.655212446	0.086845648	0.071850821	0.03960888	0.146482205	0.490593712	0.151035895	0.077645489	0.280724904	0.057075481	0.471348006	0.171324467	0.02144918	0.278802866	0.060490585	0.480245427	0.074306114	0.384957874	0.04680292	0.336912977	0.106104683	0.51017942	0.039927558	0.382954894	0.037393695	0.539723853	0.126361721	0.048807506	0.014573789	0.215364543	0.238291757	0.020351591	0.336249094
2. CVD Fall	1	Men	2016	96	0.625166319	0.035359966	0.004748239	0.113637482	0.102361065	0.004240171	0.114486759	0.558854108	0.176009003	0.081074185	0.038500027	0.145562676	0.460267179	0.188747449	0.074576738	0.276408633	0.056563125	0.477598972	0.170316904	0.020968862	0.274552138	0.060924956	0.491267833	0.071443731	0.37636348	0.026823143	0.377566815	0.101014809	0.494595233	0.057822122	0.383604415	0.03637228	0.522201183	0.112761788	0.045836862	0.027871675	0.350261936	0.113534846	0.019902783	0.32983011
2. CVD Fall	1	Men	2016	97	0.621212907	0.034515937	0.004569723	0.112345865	0.108990521	0.004177395	0.114187653	0.520603761	0.210467005	0.086596684	0.037483172	0.144849378	0.49630088	0.159558626	0.071717311	0.272423183	0.065215307	0.505073363	0.138542289	0.020538856	0.270630185	0.070863052	0.492113301	0.068777621	0.368246025	0.026676097	0.397236026	0.096277121	0.479810755	0.04975828	0.409216963	0.035437551	0.505587206	0.126341756	0.079450876	0.00533965	0.057634956	0.387921109	0.019501832	0.323809821
2. CVD Fall	1	Men	2016	98	0.546652549	0.033198095	0.007109987	0.16928111	0.125566098	0.004125469	0.114066693	0.491819318	0.255289129	0.071989712	0.036556317	0.144345524	0.551821082	0.11035141	0.069060055	0.268767452	0.055297274	0.511410541	0.146097543	0.020158688	0.267035954	0.066366302	0.506729969	0.066301232	0.360602496	0.049244372	0.393060619	0.091876931	0.465818077	0.041859251	0.433681821	0.034587731	0.489871197	0.134427551	0.051016919	0.021976701	0.279100306	0.176144192	0.019148331	0.318186001
2. CVD Fall	1	Men	2016	99	0.622288546	0.034672052	0.003913909	0.097519586	0.123393579	0.004084508	0.11412782	0.501774962	0.220417211	0.098036264	0.035717476	0.144054087	0.49105517	0.176907543	0.066597754	0.265439534	0.057644123	0.530161516	0.128598837	0.019827932	0.263767591	0.074338979	0.508224431	0.064007957	0.353428634	0.050409877	0.40918378	0.087799478	0.452606865	0.072049848	0.419089474	0.033821055	0.475039622	0.116943665	0.071123549	0.002432793	0.030641084	0.447061567	0.018841922	0.312955419
2. CVD Fall	1	Men	2016	100	0.456880263	0.03526227	0.012312826	0.246495391	0.130619746	0.004054658	0.114374847	0.508489582	0.211122537	0.101445508	0.034964656	0.143977717	0.499693245	0.173547013	0.064323113	0.262436629	0.070649469	0.472240402	0.176741571	0.0195462	0.260822359	0.06081095	0.530579076	0.061891113	0.346718861	0.038230262	0.437575426	0.084029947	0.440164365	0.059306589	0.446481466	0.03313576	0.461076185	0.117939883	0.062327025	0.00658712	0.088997323	0.397452594	0.01858229	0.308113765
2. CVD Fall	1	Men	2017	35	0.992333771	0.001729895	0	0	0.003113834	0.000128336	0.002694164	0.982199994	0	0.012863246	0.001393006	0.003543753	0.968724582	0.020003687	0.003397557	0.007874174	0	0.991507832	0	0.000689717	0.007802451	0.040154371	0.94433906	0.00318319	0.01232338	0	0.974648491	0.005680802	0.019670707	0	0.976835365	0.001300238	0.021864398	0.067008055	0.003144194	0	0	0.919099248	0.000651052	0.010097451
2. CVD Fall	1	Men	2017	36	0.992860147	0.001461618	0	0	0.002926807	0.000123005	0.002628423	0.971563935	0	0.02364401	0.001334886	0.003457169	0.966629696	0.022435001	0.00325479	0.007680513	0	0.991728413	0	0.000661012	0.007610575	0.060724474	0.924207744	0.003049532	0.01201825	0	0.97538156	0.005440167	0.019178273	0	0.977438734	0.001246006	0.02131526	0.080636751	0.003592221	0	0	0.905298794	0.00062396	0.009848274
2. CVD Fall	1	Men	2017	37	0.991781517	0.002352711	0	0	0.003183582	0.000117897	0.002564294	0.975324451	0	0.020023671	0.001279176	0.003372702	0.984892798	0.004497761	0.003117917	0.007491524	0	0.991943171	0	0.0006335	0.007423329	0.094389678	0.890968547	0.002921394	0.011720381	0	0.976093285	0.005209417	0.018697298	0	0.978027157	0.001194024	0.020778819	0.072223124	0.002818177	0	0	0.91475564	0.000597994	0.009605066
2. CVD Fall	1	Men	2017	38	0.991850336	0.002396199	0	0	0.003138726	0.000113001	0.002501738	0.969143709	0	0.026340212	0.001225777	0.003290301	0.954392329	0.035313887	0.002986692	0.007307092	0	0.992152271	0	0.000607131	0.007240599	0.09135525	0.894416615	0.002798548	0.011429588	0	0.97678438	0.004988139	0.018227481	0	0.978601065	0.001144199	0.020254736	0.07896948	0.004792236	0	0	0.906297498	0.000573106	0.009367678
2. CVD Fall	1	Men	2017	39	0.990951635	0.002327054	0	0	0.004172284	0.000108308	0.002440718	0.982344075	0	0.013271415	0.001174593	0.003209917	0.967374442	0.022637573	0.00286088	0.007127104	0	0.99235587	0	0.000581857	0.007062273	0.079816579	0.906356956	0.002680771	0.011145693	0	0.977455535	0.004775938	0.017768527	0	0.979160878	0.00109644	0.019742682	0.06159259	0.005265732	0	0	0.923456457	0.000549253	0.009135967
2. CVD Fall	1	Men	2017	40	0.99143834	0.002017323	0	0	0.002755016	0.000225927	0.003563394	0.977013674	0	0.015850613	0.00244951	0.004686203	0.966161726	0.017471967	0.005963662	0.010402644	0	0.988478357	0	0.001213588	0.010308055	0.077374033	0.900773082	0.005588461	0.016264424	0	0.964129844	0.009951059	0.025919097	0	0.968917838	0.002286574	0.028795588	0.076017466	0.006065158	0	0	0.903438543	0.001145594	0.013333238
2. CVD Fall	1	Men	2017	41	0.988589527	0.00233893	0	0	0.00537848	0.000216547	0.003476516	0.979889183	0	0.013191919	0.002347164	0.004571735	0.968876366	0.015265552	0.005711967	0.010146114	0	0.988783041	0	0.001163062	0.010053897	0.095910557	0.882877141	0.005352853	0.01585945	0	0.965210171	0.009526311	0.025263518	0	0.969745044	0.00219108	0.028063876	0.080338773	0.003667111	0	0	0.901893363	0.001097908	0.013002844
2. CVD Fall	1	Men	2017	42	0.98944508	0.002634684	0	0	0.004320899	0.000207559	0.003391777	0.975036317	0	0.018254546	0.002249062	0.004460075	0.945503594	0.039130007	0.005470642	0.009895756	0	0.989079507	0	0.001114636	0.009805857	0.065269534	0.914139476	0.005126958	0.015464031	0	0.96625812	0.009118946	0.024622933	0	0.970551704	0.002099548	0.027348748	0.070878336	0.00524066	0	0	0.910148478	0.001052205	0.012680322
2. CVD Fall	1	Men	2017	43	0.988622942	0.002347851	0	0	0.005521134	0.000198944	0.003309129	0.975512026	0	0.017981789	0.002155027	0.004351158	0.958299716	0.026809608	0.005239255	0.009651421	0	0.989367992	0	0.001068223	0.009563785	0.09816903	0.88184267	0.004910373	0.015077927	0	0.96727482	0.008728239	0.023996941	0	0.971338434	0.002011812	0.026649754	0.089442116	0.004386365	0	0	0.892797641	0.001008402	0.012365476
2. CVD Fall	1	Men	2017	44	0.988421815	0.002516515	0	0	0.005642459	0.000190689	0.003228522	0.959079467	0	0.034610721	0.002064892	0.004244919	0.975942682	0.009626967	0.005017392	0.009412959	0	0.989648725	0	0.001023741	0.009327535	0.077160349	0.903436042	0.00470271	0.014700898	0	0.968261356	0.008353496	0.023385148	0	0.972105831	0.001927716	0.025966453	0.078773884	0.005313198	0	0	0.902888383	0.00096642	0.012058114
2. CVD Fall	1	Men	2017	45	0.986457214	0.002829938	0	0	0.00597864	0.000314772	0.004419435	0.967706404	0	0.023075936	0.003407273	0.005810386	0.972817758	0.006027691	0.008274361	0.012880189	0	0.985547014	0	0.001689619	0.012763367	0.060398332	0.911736466	0.007755889	0.020109312	0	0.954261795	0.013766985	0.03197122	0	0.961324411	0.003181004	0.035494584	0.066748909	0.006125997	0	0	0.909033094	0.001595033	0.016496966
2. CVD Fall	1	Men	2017	46	0.985324416	0.00299236	0	0	0.007069635	0.000301717	0.004311873	0.970584323	0	0.020482438	0.003264654	0.005668584	0.945110075	0.034405353	0.007923067	0.012561505	0	0.985933103	0	0.001619253	0.012447644	0.064604032	0.908364033	0.007427102	0.019604833	0	0.955675686	0.013173213	0.031151101	0	0.962373922	0.003047945	0.034578133	0.064530304	0.005292746	0	0	0.912562375	0.001528625	0.01608595
2. CVD Fall	1	Men	2017	47	0.986625444	0.002775132	0	0	0.006103237	0.000289206	0.004206981	0.974019124	0	0.017322642	0.003127949	0.005530284	0.964976073	0.015187239	0.007586214	0.012250475	0	0.986308677	0	0.001551815	0.012139508	0.073689086	0.900086931	0.007111841	0.019112141	0	0.95704703	0.012603637	0.030349333	0	0.963397658	0.002920406	0.033681936	0.077798879	0.006771883	0	0	0.898279588	0.001464981	0.015684669
2. CVD Fall	1	Men	2017	48	0.986118015	0.002848502	0	0	0.006651564	0.000277217	0.004104701	0.965608211	0	0.025999468	0.002996915	0.005395406	0.952997165	0.027792721	0.007263201	0.011946914	0	0.98667404	0	0.001487185	0.011838775	0.077686944	0.896872573	0.006809546	0.018630936	0	0.958377332	0.012057252	0.029565416	0	0.964396408	0.002798159	0.032805433	0.081800353	0.006712756	0	0	0.894790023	0.001403987	0.015292882
2. CVD Fall	1	Men	2017	49	0.985222409	0.003389267	0	0	0.007117621	0.000265729	0.004004973	0.967064253	0	0.024800559	0.002871316	0.005263873	0.948504514	0.03289139	0.006953454	0.011650642	0	0.987029487	0	0.001425246	0.011545267	0.064940978	0.910378416	0.006519679	0.018160927	0	0.959668041	0.011533095	0.028798864	0	0.965370935	0.002680985	0.03194808	0.08448648	0.005833969	0	0	0.893423664	0.001345533	0.014910353
2. CVD Fall	1	Men	2017	50	0.974943339	0.003627456	2.79E-05	0.007599959	0.00783585	0.000413517	0.005551996	0.950015584	0.019059179	0.019162859	0.004465867	0.00729651	0.939167733	0.033884163	0.010806065	0.016142039	0.004485347	0.963154745	0.014146358	0.002217387	0.015996163	0.067011028	0.897705931	0.010132841	0.0251502	0.074899961	0.867342071	0.017906541	0.039851427	0.076981159	0.874649664	0.00417	0.044199177	0.076301482	0.006480168	0.00011384	0.017150345	0.877207257	0.002093404	0.020653505
2. CVD Fall	1	Men	2017	51	0.978141862	0.004171383	1.60E-05	0.003802784	0.008054266	0.000396395	0.00541732	0.960137694	0.004859746	0.023605204	0.004278539	0.007118817	0.969585495	0.004329777	0.010343649	0.015741079	0.00540526	0.965544387	0.011326359	0.00212504	0.015598955	0.074482182	0.891304638	0.009700143	0.024513037	0.03464342	0.909423541	0.017123359	0.03880968	0.120260775	0.832710732	0.003995246	0.043033246	0.077642058	0.006572641	4.38E-06	0.000662207	0.892977092	0.002006256	0.020135362
2. CVD Fall	1	Men	2017	52	0.981796052	0.003720466	3.21E-06	0.000859234	0.007955008	0.00037999	0.005286038	0.951852942	0.011895687	0.02520682	0.004098986	0.006945566	0.942823866	0.031926181	0.009900202	0.015349751	0.004652829	0.967616909	0.010482422	0.002036545	0.015211294	0.06051893	0.906305253	0.009285215	0.023890602	0.076278936	0.869558463	0.016371957	0.037790643	0.095224008	0.85905592	0.003827751	0.041892321	0.084015622	0.008304637	4.93E-05	0.005855459	0.880222784	0.001922743	0.019629427
2. CVD Fall	1	Men	2017	53	0.977834446	0.004579693	1.25E-05	0.002709608	0.009341404	0.000364273	0.005158076	0.95857026	0.005929435	0.024796757	0.003926888	0.006776659	0.955868957	0.019688277	0.009474938	0.014967828	0.005464637	0.968039995	0.009710668	0.001951743	0.014832957	0.082090888	0.885739266	0.008887321	0.023282525	0.066870504	0.880684774	0.015651024	0.036793697	0.084208572	0.871348503	0.003667216	0.04077571	0.085350369	0.009204862	0.000105573	0.0112336	0.873127481	0.001842716	0.0191354
2. CVD Fall	1	Men	2017	54	0.978314085	0.004798319	9.79E-06	0.002026812	0.009468411	0.000349215	0.005033366	0.965486194	0.001454422	0.022685441	0.00376194	0.006612004	0.94514963	0.031188174	0.009067106	0.01459509	0.006877902	0.962679908	0.014107981	0.001870483	0.014463726	0.085810581	0.882995215	0.008505759	0.022688445	0.061302697	0.887919755	0.014959304	0.035818243	0.076193998	0.880609906	0.003513353	0.039682742	0.080562549	0.008506024	0	0	0.890512402	0.001766033	0.018652993
2. CVD Fall	1	Men	2017	55	0.969414701	0.004977803	3.61E-05	0.00717102	0.010038185	0.00054655	0.007815604	0.95451795	0.00123462	0.028098592	0.005883345	0.010265493	0.920966828	0.042224911	0.014163707	0.022644554	0.006441939	0.95576434	0.01242625	0.002926484	0.022440987	0.07607517	0.875458611	0.013288459	0.03517776	0.067861084	0.853326786	0.023337819	0.05547431	0.083617192	0.849448193	0.005494876	0.061439739	0.089982959	0.009972957	0	0	0.868350299	0.002763129	0.028930657
2. CVD Fall	1	Men	2017	56	0.968769341	0.005160824	3.19E-05	0.006120068	0.011766633	0.000523991	0.007627197	0.957860386	0.00339559	0.02309143	0.005635989	0.010016606	0.921877819	0.042491128	0.013551362	0.022079691	0.007035009	0.954017532	0.01426131	0.00280469	0.02188146	0.07343876	0.879570242	0.012715624	0.034275375	0.109257196	0.814456794	0.022298162	0.053987848	0.084602527	0.850360499	0.005264159	0.059772814	0.08866456	0.00930022	0.000298668	0.03081619	0.840073443	0.002648198	0.028198721
2. CVD Fall	1	Men	2017	57	0.965797858	0.004961851	4.71E-05	0.009359515	0.011887621	0.000502382	0.007443656	0.952275693	0.009637839	0.02291347	0.005398926	0.009774072	0.927483477	0.038023954	0.012964106	0.021528463	0.00589775	0.950866776	0.019212025	0.002687998	0.021335451	0.05769838	0.896741675	0.012166292	0.033393652	0.072387231	0.85377929	0.021300572	0.052532907	0.07822986	0.858586567	0.005043052	0.058140522	0.074915373	0.010341703	0.000239617	0.022405646	0.862075595	0.002538084	0.027483982
2. CVD Fall	1	Men	2017	58	0.965202553	0.00519419	4.61E-05	0.008742053	0.013068581	0.000481686	0.007264886	0.935976594	0.021966058	0.027347847	0.005171736	0.009537765	0.903592045	0.063016479	0.01240091	0.020990566	0.008587918	0.949729931	0.018303292	0.0025762	0.020802659	0.067510983	0.888317425	0.011639501	0.032532091	0.064807978	0.863740026	0.02034334	0.051108657	0.099134665	0.839492234	0.004831161	0.05654194	0.093217965	0.011383878	4.54E-06	0.000394403	0.865780582	0.00243259	0.02678604
2. CVD Fall	1	Men	2017	59	0.965359301	0.005515533	4.47E-05	0.007993576	0.013534233	0.000461864	0.007090798	0.940646462	0.015559025	0.029532929	0.004954018	0.009307566	0.932266197	0.035407303	0.011860793	0.020465708	0.007868322	0.953922961	0.015456823	0.002469099	0.020282796	0.065073151	0.892102313	0.01113433	0.031690206	0.045577379	0.885283488	0.019424831	0.049714301	0.075884585	0.864511117	0.004628113	0.054976184	0.085994121	0.009725986	3.21E-05	0.003258137	0.872553614	0.002331529	0.026104506
2. CVD Fall	1	Men	2017	60	0.967597559	0.005361969	1.31E-05	0.002426656	0.012548216	0.000690379	0.011362107	0.93180487	0.017279031	0.028607492	0.007397248	0.014911359	0.899326108	0.050236284	0.017681508	0.032756101	0.005810896	0.937584507	0.020451771	0.003688974	0.032463852	0.076605461	0.85612062	0.016601373	0.050672546	0.052715031	0.839008364	0.028906127	0.079370478	0.08668201	0.818675086	0.006911144	0.087731761	0.095544039	0.010138883	0.000166089	0.015951315	0.832955113	0.003483551	0.041761009
2. CVD Fall	1	Men	2017	61	0.960046691	0.005722848	4.38E-05	0.007555024	0.014878289	0.000662047	0.01109128	0.945929247	0.00248813	0.029944048	0.00708562	0.014552955	0.913710398	0.037446494	0.016907179	0.031935929	0.007497065	0.93663862	0.020676996	0.003535788	0.031651531	0.064020549	0.870749364	0.015877246	0.049352841	0.060817321	0.834418863	0.027587877	0.07717594	0.094669331	0.813445042	0.006620539	0.085265088	0.085277626	0.00997241	0	0	0.860716692	0.003339011	0.04069426
2. CVD Fall	1	Men	2017	62	0.960379384	0.005453211	3.64E-05	0.006589169	0.016079201	0.000634922	0.010827742	0.94004961	0.007634343	0.031324973	0.006787036	0.014204038	0.889825733	0.062873809	0.016164623	0.031135835	0.007885222	0.933732526	0.02413406	0.003389072	0.030859119	0.07430441	0.862449468	0.015182883	0.048063239	0.044478914	0.854171159	0.026323031	0.075026896	0.094383706	0.816425825	0.006342113	0.082848357	0.088790747	0.012405838	0.000174286	0.013679827	0.842096033	0.003200581	0.039652688
2. CVD Fall	1	Men	2017	63	0.956740858	0.006319383	5.40E-05	0.008417329	0.017288108	0.000608956	0.010571375	0.934486208	0.011675124	0.033473247	0.006500972	0.013864448	0.911418633	0.042773388	0.015452564	0.030355415	0.007979329	0.93255533	0.026130553	0.00324857	0.030086218	0.068520482	0.870159362	0.014517088	0.046803069	0.042567388	0.859400858	0.02510948	0.072922274	0.077265333	0.836178896	0.006075375	0.080480396	0.088004627	0.012135766	0.000181905	0.014585932	0.843387998	0.003068015	0.038635757
2. CVD Fall	1	Men	2017	64	0.958738536	0.006260073	4.85E-05	0.007645534	0.016401147	0.000584103	0.010322068	0.924472254	0.016894345	0.038872438	0.006226928	0.013534036	0.902161482	0.05347445	0.014769781	0.029594286	0.008329075	0.937471423	0.02175302	0.003114033	0.029332449	0.068741393	0.871808199	0.013878716	0.045571692	0.085564864	0.819628857	0.023945218	0.070861061	0.093854389	0.822165643	0.005819859	0.078160109	0.100037721	0.012529582	0.000172612	0.013416558	0.83325949	0.002941082	0.037642954
2. CVD Fall	1	Men	2017	65	0.952654271	0.006415438	5.18E-05	0.007950371	0.017071523	0.000813277	0.015043368	0.924562394	0.011800869	0.035260556	0.008657091	0.01971909	0.86938259	0.067069986	0.020487443	0.043059981	0.008018342	0.921942302	0.023026482	0.004332919	0.042679955	0.070129421	0.844397315	0.019255977	0.066217287	0.067465214	0.796657538	0.033134287	0.102742962	0.08367636	0.794975661	0.008092032	0.113255947	0.093642148	0.012335313	0.000285508	0.022336496	0.812574667	0.00409246	0.054733407
2. CVD Fall	1	Men	2017	66	0.949087337	0.006498991	5.91E-05	0.008956181	0.019926195	0.000780248	0.014691924	0.923708685	0.013278693	0.035467706	0.008292168	0.019252749	0.872262238	0.066181319	0.019576414	0.041980029	0.008941152	0.91326296	0.032031409	0.004153952	0.041610527	0.078080879	0.83905197	0.018404337	0.064462813	0.065420662	0.80320786	0.031579303	0.099792175	0.079282127	0.803035118	0.007751825	0.10993093	0.099190003	0.012288073	0	0	0.831276706	0.003923618	0.0533216
2. CVD Fall	1	Men	2017	67	0.947273186	0.007346109	7.34E-05	0.009819873	0.020388177	0.000748654	0.014350597	0.926584383	0.010100435	0.036572959	0.007942702	0.018799521	0.888712772	0.051656851	0.018703042	0.040927335	0.009143458	0.913969273	0.032336471	0.003982662	0.040568135	0.065107949	0.854555336	0.017587965	0.062748749	0.053048239	0.819961574	0.030087934	0.096902253	0.086469979	0.799431091	0.007426051	0.10667288	0.093854444	0.012312132	0.000231826	0.018249261	0.819646561	0.003762025	0.051943751
2. CVD Fall	1	Men	2017	68	0.945143972	0.007325851	7.79E-05	0.010437891	0.022276721	0.000718438	0.014019272	0.913839664	0.019539116	0.040653887	0.007608089	0.018359244	0.878333489	0.063899199	0.017865863	0.039901448	0.010212134	0.912955985	0.033460792	0.003818753	0.039552335	0.067539518	0.85458065	0.016805487	0.061074345	0.064309814	0.812960291	0.028657793	0.094072102	0.081463732	0.807941465	0.007114145	0.103480658	0.093825743	0.012477927	0.000197761	0.015403851	0.823888061	0.003607401	0.050599256
2. CVD Fall	1	Men	2017	69	0.945880065	0.006902231	8.06E-05	0.011468137	0.021281529	0.00068955	0.013697846	0.915703636	0.014907838	0.044169003	0.007287754	0.01793177	0.874907145	0.069127419	0.017063483	0.038901953	0.010186456	0.909641262	0.037947626	0.003661942	0.038562714	0.079321016	0.845184488	0.016055593	0.059438903	0.061737763	0.819674886	0.027286615	0.091300737	0.054378197	0.838452972	0.006815571	0.10035326	0.105819145	0.014197641	0	0	0.827236183	0.003459478	0.049287554
2. CVD Fall	1	Men	2017	70	0.932020423	0.007563547	9.84E-05	0.012738932	0.024070652	0.001145814	0.022362275	0.899279649	0.016104893	0.043268258	0.012084346	0.029262853	0.832238853	0.076194154	0.028205858	0.063361135	0.011748282	0.879819961	0.039541998	0.006079188	0.062810571	0.069114063	0.807710386	0.026548365	0.096627186	0.038183389	0.768869847	0.044957882	0.147988882	0.084444811	0.741725257	0.011303096	0.162526836	0.096731028	0.013715649	0.000222931	0.015770876	0.787616425	0.005743451	0.08019964
2. CVD Fall	1	Men	2017	71	0.927758673	0.007921189	0.000123163	0.015187303	0.026051556	0.001100148	0.021857969	0.90039306	0.020259713	0.039179859	0.011576474	0.028590893	0.849979851	0.06131178	0.026930631	0.061777738	0.008128237	0.887105235	0.037692604	0.00583094	0.061242985	0.068416113	0.812204991	0.02535674	0.094022156	0.047543495	0.766127544	0.042777522	0.143551439	0.071093934	0.760561407	0.010829809	0.157514851	0.091838396	0.014751939	0	0	0.809784955	0.005509296	0.078115414
2. CVD Fall	1	Men	2017	72	0.928677589	0.008437172	0.00012664	0.014661159	0.025671086	0.001056533	0.021369822	0.897566089	0.020130585	0.043272967	0.011090604	0.027939755	0.85466468	0.059389577	0.025709076	0.060236668	0.01148861	0.881487358	0.041712996	0.005593643	0.059717392	0.0651247	0.819180671	0.024215356	0.091479272	0.062422423	0.75768053	0.040688617	0.139208429	0.067503389	0.769512027	0.010377068	0.152607516	0.108793129	0.016121875	0	0	0.793715932	0.005285482	0.076083581
2. CVD Fall	1	Men	2017	73	0.920761808	0.008701258	0.000177645	0.019829865	0.028616774	0.001014896	0.020897754	0.891295242	0.02848564	0.042283894	0.010625916	0.027309308	0.836150073	0.080573259	0.024539217	0.05873745	0.010878246	0.88138046	0.044141074	0.005366895	0.058233325	0.071378192	0.816501707	0.023122357	0.088997744	0.055079124	0.771273892	0.038687991	0.134958993	0.076059375	0.766192422	0.00994411	0.147804093	0.098896602	0.017198128	0.000387144	0.021628091	0.782714911	0.00507163	0.074103493
2. CVD Fall	1	Men	2017	74	0.923698057	0.009201922	0.000140548	0.014903423	0.030639171	0.000975166	0.020441712	0.889771603	0.028158237	0.045189076	0.010181634	0.02669945	0.859182998	0.060118156	0.023419179	0.057279667	0.014416772	0.884992019	0.038650523	0.005150314	0.056790371	0.074732975	0.81661417	0.022075978	0.086576877	0.059094016	0.773330881	0.03677263	0.130802473	0.074783921	0.772581785	0.009530209	0.143104084	0.100149442	0.015783026	0.001127115	0.065526098	0.740372364	0.00486738	0.072174574
2. CVD Fall	1	Men	2017	75	0.899196219	0.009245584	0.000211384	0.022140769	0.034130325	0.001609504	0.033466215	0.879390576	0.017152385	0.043015494	0.016754853	0.043686691	0.785150192	0.083006703	0.03837481	0.093468295	0.014358086	0.831371133	0.053107782	0.008489098	0.092673901	0.065210759	0.757691894	0.036189429	0.140907918	0.03781524	0.690130905	0.059998783	0.212055072	0.072001092	0.680566428	0.015686164	0.231746316	0.107110136	0.017579697	0.000261162	0.014377261	0.735030474	0.008023479	0.11761779
2. CVD Fall	1	Men	2017	76	0.903957524	0.010848336	0.000196653	0.017608084	0.033085201	0.001547498	0.032756704	0.858561863	0.033760256	0.048884715	0.016058264	0.042734902	0.803776068	0.06844427	0.036613548	0.091166114	0.014254018	0.83618017	0.05102006	0.008150272	0.09039548	0.062292596	0.766105635	0.03454421	0.137057559	0.05168485	0.685917583	0.056988088	0.20540948	0.080502945	0.680232142	0.015037372	0.224227541	0.102909089	0.020370477	5.20E-05	0.002496364	0.751908808	0.007703991	0.114559227
2. CVD Fall	1	Men	2017	77	0.893175038	0.010722635	0.000267865	0.024104569	0.038167452	0.001488446	0.032073995	0.855057311	0.038864848	0.048867367	0.0153931	0.041817374	0.79955259	0.076586552	0.034929119	0.088931739	0.01074975	0.837927607	0.055311152	0.007827141	0.088184349	0.076006516	0.757716438	0.032970854	0.133306192	0.059908027	0.687064065	0.054109848	0.198918059	0.074995386	0.693705031	0.014417937	0.216881647	0.1004845	0.019808694	0	0	0.760723332	0.007399327	0.111584148
2. CVD Fall	1	Men	2017	78	0.898872585	0.010530403	0.000237216	0.021793274	0.035716094	0.001432254	0.031418172	0.871970889	0.021797395	0.050539281	0.01475828	0.040934153	0.802071854	0.077844382	0.033318911	0.086764853	0.015480824	0.826288118	0.064671681	0.007519178	0.086040199	0.066846439	0.772033351	0.031466905	0.129653305	0.062731836	0.693327267	0.051359875	0.192581023	0.073479692	0.702984135	0.013826848	0.209709325	0.113912735	0.022693841	0	0	0.747592343	0.007108991	0.108692091
2. CVD Fall	1	Men	2017	79	0.889258232	0.011552984	0.00031679	0.026371998	0.040331793	0.001378833	0.030789371	0.856771462	0.038535908	0.050454508	0.01415278	0.040085341	0.791995425	0.091558896	0.031780444	0.084665235	0.015831477	0.838737791	0.054242033	0.007225888	0.083962811	0.075666332	0.768205091	0.030030033	0.126098543	0.063066834	0.7018001	0.048734184	0.186398881	0.048242027	0.735783213	0.013263154	0.202711605	0.107333126	0.020467013	0.001439099	0.064254855	0.693790674	0.006832517	0.105882716
2. CVD Fall	1	Men	2017	80	0.861021317	0.013612407	0.000456344	0.031980391	0.036847104	0.002456361	0.053626077	0.818731889	0.039729327	0.046668398	0.02510854	0.069761846	0.707821749	0.089326225	0.056061788	0.146790238	0.016443372	0.774067529	0.051059733	0.012848324	0.145581042	0.075341314	0.653791982	0.053003884	0.217862819	0.046391503	0.547689939	0.085501888	0.32041667	0.063631099	0.564849827	0.023537031	0.347982043	0.112015386	0.026624663	0	0	0.665961799	0.012150423	0.183247729
2. CVD Fall	1	Men	2017	81	0.857052444	0.014742409	0.00049513	0.031998957	0.040737584	0.002367356	0.05260612	0.804912573	0.044825682	0.057792721	0.024091836	0.068377187	0.709675553	0.093556649	0.05346891	0.143298888	0.0214606	0.753974006	0.070080366	0.012357615	0.142127413	0.080172	0.65734971	0.050582423	0.211895866	0.047395271	0.561530542	0.081084594	0.309989593	0.060936075	0.580293918	0.022590885	0.336179121	0.10516946	0.021424855	0.000522642	0.023290638	0.659354568	0.011687964	0.178549873
2. CVD Fall	1	Men	2017	82	0.844191042	0.013257959	0.000523615	0.037470252	0.050638689	0.002283047	0.051635396	0.82178617	0.03265356	0.055381195	0.023124284	0.067054791	0.720308775	0.088768092	0.050996334	0.139926799	0.017694189	0.756186695	0.075435337	0.011891612	0.138792167	0.070521739	0.675101989	0.048273384	0.206102889	0.043138985	0.580140785	0.076877039	0.299843191	0.055814293	0.597800148	0.02169068	0.32469488	0.114635557	0.028124221	0.001032195	0.0343698	0.636591077	0.011248852	0.173998297
2. CVD Fall	1	Men	2017	83	0.856072809	0.015352134	0.000463122	0.028820122	0.046374009	0.002203312	0.050714492	0.795144072	0.054475674	0.062380638	0.022204378	0.065795238	0.702069056	0.112616421	0.048640338	0.136674184	0.021042098	0.753268275	0.078664499	0.011449603	0.135575525	0.074068978	0.679373507	0.046073273	0.200484241	0.052507318	0.584639557	0.072873069	0.289980056	0.066769666	0.598862392	0.020835016	0.313532925	0.120488283	0.023242366	0.003382467	0.123659337	0.548801956	0.01083242	0.169593171
2. CVD Fall	1	Men	2017	84	0.852856603	0.01790832	0.000389144	0.020878524	0.055995284	0.002128038	0.049844087	0.801898748	0.05479684	0.057374504	0.0213307	0.064599208	0.712588966	0.107472267	0.046397378	0.133541388	0.020805403	0.738009241	0.097676596	0.011030926	0.132477833	0.077798364	0.683182393	0.043978767	0.195040476	0.046874257	0.603655949	0.069066753	0.280403042	0.061594706	0.615685617	0.020022575	0.302697102	0.108900862	0.025511666	0.002660631	0.091780769	0.595373202	0.010438045	0.165334825
2. CVD Fall	1	Men	2017	85	0.842418672	0.021152223	0.00042722	0.019370315	0.052770351	0.002622221	0.061239	0.788825205	0.062754252	0.043006985	0.02613383	0.079279729	0.676697204	0.103830535	0.056423501	0.16304876	0.022369921	0.713844903	0.088465765	0.013556409	0.161763002	0.080453091	0.6289743	0.053520526	0.237052083	0.045118937	0.532788153	0.083432233	0.338660677	0.077787153	0.532684347	0.024540713	0.364987788	0.121497121	0.030136414	0.005186048	0.141634069	0.487325368	0.012830064	0.201390916
2. CVD Fall	1	Men	2017	86	0.77882928	0.024071095	0.002033274	0.075856916	0.056391268	0.002537267	0.060280899	0.749148243	0.087334399	0.060436917	0.025132997	0.077947445	0.666296643	0.120426873	0.053839838	0.159436646	0.032443362	0.697551669	0.098732486	0.013079902	0.158192581	0.096424255	0.621775945	0.051107961	0.230691838	0.036861115	0.556652444	0.079062463	0.327423978	0.068234144	0.555873173	0.023610643	0.35228204	0.109044052	0.042132893	0.00282471	0.060005822	0.577170851	0.012381428	0.196440244
2. CVD Fall	1	Men	2017	87	0.785505003	0.018354025	0.001435967	0.071124294	0.061733963	0.002457649	0.059389099	0.767670888	0.073191406	0.058253663	0.024186276	0.076697768	0.678704572	0.113931267	0.051387888	0.155976272	0.017376143	0.710226868	0.104993213	0.012630949	0.154772827	0.078921183	0.64770717	0.048818435	0.224553213	0.034910442	0.573609968	0.074923266	0.316556325	0.052473616	0.584796642	0.022731211	0.339998531	0.113377276	0.020563886	0.014340839	0.396515822	0.251568242	0.011958857	0.191675078
2. CVD Fall	1	Men	2017	88	0.800626879	0.020979631	0.001436954	0.062665301	0.053343067	0.002383275	0.058564893	0.778918908	0.051768569	0.070488274	0.023292246	0.075532003	0.6594489	0.138818735	0.049063855	0.152668509	0.024348523	0.682675457	0.129262476	0.012208928	0.151504615	0.060789139	0.673924981	0.046648404	0.218637476	0.050202104	0.57272855	0.071007824	0.306061522	0.068734394	0.58122262	0.021901103	0.328141882	0.107641186	0.033487147	0.008239679	0.189227507	0.462746376	0.011561773	0.187096332
2. CVD Fall	1	Men	2017	89	0.813439906	0.019250658	0.000877653	0.042725243	0.063582793	0.002314067	0.05780968	0.734891304	0.095066405	0.073141169	0.022449569	0.074451553	0.673696753	0.129924905	0.046864069	0.149514273	0.02551267	0.706697772	0.107587423	0.011813272	0.148388863	0.068096165	0.674363466	0.044594455	0.212945914	0.051892325	0.584855134	0.067309415	0.295943126	0.066340555	0.595824061	0.021119087	0.316716297	0.122278356	0.031895806	0.005168534	0.134279079	0.512483625	0.011189646	0.182704954
2. CVD Fall	1	Men	2017	90	0.700610202	0.022656516	0.001772442	0.070782528	0.076778299	0.004672668	0.122727345	0.645638336	0.073698055	0.077869773	0.044976758	0.157817079	0.447509706	0.144709886	0.09300848	0.314771928	0.035272408	0.522446307	0.106081249	0.023765538	0.312434498	0.065891004	0.399777734	0.088581434	0.445749828	0.051031631	0.201543724	0.132542892	0.614881753	0.070304494	0.230541546	0.042333063	0.656820897	0.129625176	0.03024615	0.014143792	0.304482264	0.115492509	0.022516423	0.383493686
2. CVD Fall	1	Men	2017	91	0.710850783	0.022966011	0.001548114	0.061603818	0.0770701	0.004550009	0.121411164	0.630204744	0.109376046	0.061114747	0.043432266	0.155872197	0.491334295	0.111070685	0.088934091	0.30866093	0.027868728	0.49307681	0.149602612	0.023050214	0.306401637	0.077597882	0.403131446	0.084777582	0.43449309	0.048763332	0.230734383	0.12572216	0.594780125	0.055330808	0.269619319	0.040901644	0.634148229	0.147540297	0.043073615	0.004639805	0.092603376	0.315428343	0.021844345	0.374870219
2. CVD Fall	1	Men	2017	92	0.672680401	0.026047809	0.003003389	0.100379245	0.073197944	0.004437748	0.120253465	0.611265434	0.118418329	0.074208609	0.04198696	0.154120668	0.489686876	0.122331584	0.08509608	0.30288546	0.037482106	0.500685295	0.138743851	0.022386694	0.300702054	0.06404084	0.431039262	0.081194739	0.423725159	0.049639816	0.255545217	0.119310836	0.575504131	0.05303216	0.294984409	0.039563266	0.612420164	0.128674167	0.047305064	0	0	0.436144591	0.021221371	0.366654808
2. CVD Fall	1	Men	2017	93	0.696460462	0.033616281	0.002922041	0.077049901	0.066357468	0.004335826	0.119258022	0.631693835	0.101914664	0.073186824	0.040638599	0.152566079	0.449792011	0.17127343	0.081487496	0.297447062	0.038062113	0.518639872	0.126186524	0.021774177	0.295337314	0.070555599	0.438170318	0.077826491	0.413447592	0.046021256	0.283627034	0.113295162	0.557056548	0.068128983	0.301916102	0.038315893	0.591639022	0.13317999	0.046102394	0.007038476	0.125410922	0.308772729	0.020646766	0.358848723
2. CVD Fall	1	Men	2017	94	0.664463507	0.03412583	0.003188077	0.082251298	0.093298328	0.004244214	0.118428746	0.575426744	0.15598757	0.077988582	0.039385039	0.151212065	0.517757072	0.111794525	0.078101458	0.292346945	0.043091139	0.499782912	0.145605355	0.021211943	0.290308652	0.060772317	0.460899894	0.074666503	0.403661286	0.037444932	0.31545543	0.107661324	0.539438314	0.05735881	0.333678837	0.037157581	0.571804772	0.121125498	0.035414006	0.003930494	0.095968963	0.371988405	0.020119879	0.351452756
2. CVD Fall	1	Men	2017	95	0.678479363	0.032222067	0.002817736	0.077597549	0.086950719	0.004162911	0.117769655	0.655361884	0.084500816	0.071850821	0.038224214	0.150062265	0.486447096	0.151035895	0.074931122	0.287585886	0.054591976	0.467767335	0.171324467	0.02069935	0.285616873	0.060490585	0.473434594	0.071708487	0.394366334	0.04680292	0.328153328	0.102395428	0.522648324	0.039927558	0.371071143	0.036086469	0.55291483	0.126361721	0.047060132	0.013563275	0.210166723	0.238740919	0.019640131	0.3444671
2. CVD Fall	1	Men	2017	96	0.627128862	0.033943984	0.004419006	0.1107703	0.102361065	0.004091941	0.117284842	0.561394667	0.17125676	0.081074185	0.037154126	0.149120262	0.456118775	0.188747449	0.071969651	0.283164125	0.054101913	0.474083104	0.170316904	0.020235823	0.281262256	0.060924956	0.484566984	0.068946169	0.385561891	0.026823143	0.369010114	0.097483488	0.506683255	0.057822122	0.372113216	0.035100761	0.534963901	0.112761788	0.044562169	0.025939115	0.341984889	0.117653792	0.019207013	0.337891234
2. CVD Fall	1	Men	2017	97	0.623108756	0.033132071	0.004252868	0.109505999	0.108990521	0.00403136	0.116978425	0.524056572	0.204784396	0.086596684	0.036172818	0.14838953	0.49214992	0.159558626	0.069210185	0.279081269	0.062377616	0.502014796	0.138542289	0.019820849	0.277244449	0.070863052	0.485517642	0.066373262	0.377246044	0.026676097	0.388875039	0.092911422	0.491537442	0.04975828	0.398099136	0.034198709	0.517943875	0.126341756	0.076131655	0.00496941	0.056304881	0.38570841	0.018820078	0.331723808
2. CVD Fall	1	Men	2017	98	0.550032432	0.031937175	0.006616996	0.165011541	0.125566098	0.003981249	0.11685451	0.496462238	0.248396323	0.071989712	0.035278364	0.147873363	0.547666576	0.11035141	0.066645823	0.275336192	0.052891143	0.507994968	0.146097543	0.019453971	0.273562375	0.066366302	0.500234548	0.063983444	0.369415705	0.049244372	0.384887792	0.088665056	0.477202779	0.041859251	0.422918388	0.033378597	0.501843763	0.134427551	0.04936459	0.020452884	0.272495043	0.178818457	0.018478935	0.32596254
2. CVD Fall	1	Men	2017	99	0.623788323	0.033264456	0.003642527	0.095052264	0.123393579	0.00394172	0.116917131	0.505454139	0.214465946	0.098036264	0.034468848	0.147574802	0.48689592	0.176907543	0.064269599	0.271926938	0.055135875	0.526916377	0.128598837	0.019134778	0.270214133	0.074338979	0.501824172	0.061770338	0.362066512	0.050409877	0.401191296	0.084730144	0.463668682	0.072049848	0.408661727	0.032638723	0.486649701	0.116943665	0.068091602	0.002264109	0.029916774	0.443996489	0.018183238	0.320604122
2. CVD Fall	1	Men	2017	100	0.462430855	0.034045896	0.011459081	0.240361313	0.130619746	0.003912913	0.117170195	0.511893352	0.205422228	0.101445508	0.033742346	0.147496565	0.495527869	0.173547013	0.062074476	0.268850641	0.067575323	0.469623293	0.176741571	0.018862895	0.267196918	0.06081095	0.524268804	0.059727495	0.35519275	0.038230262	0.429755264	0.08109239	0.450922085	0.059306589	0.436371032	0.031977385	0.472344994	0.117939883	0.059785124	0.006130384	0.086873279	0.39569451	0.017932682	0.315644137
2. CVD Fall	1	Men	2018	35	0.992432871	0.001678482	0	0	0.003113834	0.000123283	0.00265153	0.982310921	0	0.012863246	0.001338158	0.003487675	0.968982963	0.020003687	0.003263781	0.007749568	0	0.991658459	0	0.00066256	0.007678981	0.040154371	0.944659407	0.003057855	0.012128367	0	0.975183448	0.005457126	0.019359426	0	0.977232556	0.001249042	0.021518402	0.067008055	0.003050748	0	0	0.919378116	0.000625417	0.009937663
2. CVD Fall	1	Men	2018	36	0.992949293	0.001418909	0	0	0.002926807	0.000118162	0.002586829	0.971671204	0	0.02364401	0.001282326	0.003402461	0.966879392	0.022435001	0.003126636	0.007558972	0	0.991874874	0	0.000634985	0.007490141	0.060724474	0.924518	0.002929459	0.011828066	0	0.97589925	0.005225966	0.018874784	0	0.977825099	0.001196946	0.020977955	0.080636751	0.003487255	0	0	0.905584173	0.000599392	0.009692429
2. CVD Fall	1	Men	2018	37	0.991894329	0.00228512	0	0	0.003183582	0.000113255	0.002523715	0.975428189	0	0.020023671	0.00122881	0.00331933	0.985134113	0.004497761	0.002995152	0.007372974	0	0.992085586	0	0.000608556	0.007305858	0.094389678	0.891269044	0.002806367	0.01153491	0	0.976594278	0.005004301	0.01840142	0	0.978402987	0.001147011	0.020450003	0.072223124	0.002737213	0	0	0.915012146	0.000574448	0.009453069
2. CVD Fall	1	Men	2018	38	0.991962131	0.002328442	0	0	0.003138726	0.000108551	0.002462149	0.969244041	0	0.026340212	0.001177513	0.003238233	0.954625559	0.035313887	0.002869094	0.00719146	0	0.992290755	0	0.000583226	0.007126019	0.09135525	0.894707673	0.002688358	0.011248719	0	0.977269226	0.004791736	0.017939038	0	0.97896664	0.001099147	0.019934213	0.07896948	0.004656728	0	0	0.906603812	0.000550541	0.009219439
2. CVD Fall	1	Men	2018	39	0.991059705	0.002261872	0	0	0.004172284	0.000104044	0.002402095	0.982441119	0	0.013271415	0.001128344	0.003159122	0.96759987	0.022637573	0.002748236	0.007014321	0	0.992490537	0	0.000558947	0.006950515	0.079816579	0.906638885	0.002575219	0.010969317	0	0.977924763	0.00458789	0.017487348	0	0.979516469	0.001053269	0.019430262	0.06159259	0.005118236	0	0	0.923770153	0.000527627	0.008991394
2. CVD Fall	1	Men	2018	40	0.991518464	0.001960648	0	0	0.002755016	0.000221514	0.003544358	0.977086555	0	0.015850613	0.002401664	0.004661169	0.966333786	0.017471967	0.005847174	0.010347073	0	0.988557128	0	0.001189883	0.010252989	0.077374033	0.900969127	0.005479301	0.016177539	0	0.964462679	0.009756685	0.025780636	0	0.969116329	0.00224191	0.028641761	0.076017466	0.005894762	0	0	0.903702543	0.001123217	0.013262012
2. CVD Fall	1	Men	2018	41	0.9886794	0.002271858	0	0	0.00537848	0.000212317	0.003457944	0.979959453	0	0.013191919	0.002301317	0.004547312	0.969042139	0.015265552	0.005600395	0.010091913	0	0.988859467	0	0.001140344	0.010000189	0.095910557	0.88306642	0.005248295	0.015774728	0	0.965531207	0.009340234	0.025128559	0	0.969937761	0.002148282	0.027913958	0.080338773	0.003561952	0	0	0.902089429	0.001076463	0.012933382
2. CVD Fall	1	Men	2018	42	0.989546013	0.002555925	0	0	0.004320899	0.000203504	0.003373658	0.975104074	0	0.018254546	0.002205131	0.004436249	0.945663316	0.039130007	0.005363784	0.009842893	0	0.989153662	0	0.001092864	0.009753474	0.065269534	0.91432223	0.005026813	0.015381422	0	0.966567778	0.008940826	0.024491396	0	0.970738813	0.002058537	0.02720265	0.070878336	0.005083999	0	0	0.91039343	0.001031652	0.012612583
2. CVD Fall	1	Men	2018	43	0.988719137	0.00227322	0	0	0.005521134	0.000195058	0.003291451	0.975577364	0	0.017981789	0.002112933	0.004327914	0.958453613	0.026809608	0.005136916	0.009599862	0	0.989439948	0	0.001047358	0.009512695	0.09816903	0.882019131	0.004814459	0.014997379	0	0.967573502	0.00855775	0.023868748	0	0.971520095	0.001972515	0.02650739	0.089442116	0.004246935	0	0	0.893022825	0.000988705	0.012299419
2. CVD Fall	1	Men	2018	44	0.988528516	0.002430785	0	0	0.005642459	0.000186965	0.003211275	0.959142477	0	0.034610721	0.002024559	0.004222243	0.976090971	0.009626967	0.004919387	0.009362675	0	0.98971855	0	0.001003744	0.009277707	0.077160349	0.903606433	0.004610852	0.014622365	0	0.968549449	0.008190327	0.023260224	0	0.972282199	0.001890062	0.025827739	0.078773884	0.005132194	0	0	0.90315268	0.000947543	0.011993699
2. CVD Fall	1	Men	2018	45	0.986599413	0.002726979	0	0	0.00597864	0.000306458	0.004388511	0.967837058	0	0.023075936	0.003317278	0.005769729	0.973126436	0.006027691	0.008055812	0.012790061	0	0.985680953	0	0.001644991	0.012674056	0.060398332	0.912082035	0.007551034	0.019968598	0	0.954849138	0.01340336	0.031747503	0	0.961656802	0.003096985	0.035246213	0.066748909	0.005903121	0	0	0.909413538	0.001552904	0.016381529
2. CVD Fall	1	Men	2018	46	0.985477485	0.002877432	0	0	0.007069635	0.000293747	0.004281701	0.970710218	0	0.020482438	0.003178425	0.005628919	0.945407245	0.034405353	0.007713796	0.012473606	0	0.986062974	0	0.001576484	0.012360542	0.064604032	0.908697388	0.007230931	0.019467649	0	0.956241607	0.012825271	0.030933123	0	0.962696386	0.00296744	0.034336174	0.064530304	0.005089467	0	0	0.91291859	0.00148825	0.015973389
2. CVD Fall	1	Men	2018	47	0.98677308	0.002664573	0	0	0.006103237	0.000281567	0.004177543	0.97414044	0	0.017322642	0.003045331	0.005491586	0.965262168	0.015187239	0.00738584	0.012164753	0	0.98643461	0	0.001510827	0.012054562	0.073689086	0.900408512	0.006923997	0.018978405	0	0.957592296	0.012270739	0.030136964	0	0.963710482	0.002843269	0.033446248	0.077798879	0.006502098	0	0	0.89869782	0.001426287	0.015574916
2. CVD Fall	1	Men	2018	48	0.986269368	0.002733194	0	0	0.006651564	0.000269895	0.004075979	0.965725122	0	0.025999468	0.002917758	0.005357652	0.953272605	0.027792721	0.007071359	0.011863316	0	0.986796162	0	0.001447904	0.011755934	0.077686944	0.897182802	0.006629687	0.018500567	0	0.958902681	0.011738786	0.029358533	0	0.96469987	0.002724251	0.032575879	0.081800353	0.006441021	0	0	0.895205852	0.001366903	0.015185871
2. CVD Fall	1	Men	2018	49	0.985394639	0.00325208	0	0	0.007117621	0.000258711	0.003976949	0.967176926	0	0.024800559	0.002795476	0.005227039	0.9487697	0.03289139	0.006769793	0.011569117	0	0.98714792	0	0.001387601	0.011464479	0.064940978	0.9106777	0.006347475	0.018033847	0	0.960174182	0.011228473	0.028597346	0	0.965665302	0.002610173	0.031724525	0.08448648	0.005597828	0	0	0.893799679	0.001309994	0.014806019
2. CVD Fall	1	Men	2018	50	0.975399333	0.003482916	2.60E-05	0.007395847	0.00783585	0.000400181	0.005459829	0.95079533	0.018544581	0.019162859	0.004321847	0.007175384	0.939784188	0.033884163	0.010457578	0.015874071	0.00430573	0.963671418	0.014146358	0.002145878	0.015730617	0.067011028	0.898450217	0.009806065	0.024732691	0.074899961	0.868581101	0.017329069	0.039189868	0.076981159	0.875517878	0.004035521	0.043465442	0.076301482	0.006223617	0.000106331	0.016691721	0.878340312	0.002025893	0.020310643
2. CVD Fall	1	Men	2018	51	0.978511572	0.004007494	1.49E-05	0.003700721	0.008054266	0.000383611	0.005327389	0.960525064	0.004728533	0.023605204	0.004140559	0.00700064	0.970180381	0.004329777	0.010010075	0.015479767	0.005192356	0.966084774	0.011326359	0.002056509	0.015340002	0.074482182	0.892024392	0.009387321	0.024106105	0.03464342	0.910620021	0.016571144	0.038165415	0.120260775	0.833553955	0.003866403	0.042318867	0.077642058	0.006313869	4.10E-06	0.000644495	0.893652822	0.001941555	0.019801102
2. CVD Fall	1	Men	2018	52	0.982063219	0.003576591	3.00E-06	0.000836156	0.007955008	0.000367736	0.005198286	0.952421616	0.011574503	0.02520682	0.003966797	0.006830265	0.943397956	0.031926181	0.009580928	0.015094935	0.004472795	0.968115138	0.010482422	0.001970868	0.014958777	0.06051893	0.907001293	0.008985774	0.023494003	0.076278936	0.870713795	0.015843975	0.037163294	0.095224008	0.859874801	0.003704309	0.041196882	0.084015622	0.007984582	4.61E-05	0.005699219	0.881090136	0.001860736	0.019303566
2. CVD Fall	1	Men	2018	53	0.978179575	0.004405435	1.17E-05	0.002636912	0.009341404	0.000352525	0.005072449	0.958969491	0.005769341	0.024796757	0.003800249	0.006664162	0.956422992	0.019688277	0.009169379	0.014719352	0.00525632	0.968557491	0.009710668	0.001888801	0.014586721	0.082090888	0.88641238	0.008600712	0.02289602	0.066870504	0.881800306	0.015146291	0.036182898	0.084208572	0.87214367	0.003548951	0.040098807	0.085350369	0.008856705	9.88E-05	0.010934209	0.874158881	0.00178329	0.01881774
2. CVD Fall	1	Men	2018	54	0.978644822	0.00461739	9.17E-06	0.001972448	0.009468411	0.000337953	0.004949809	0.965756546	0.001415152	0.022685441	0.00364062	0.00650224	0.945684325	0.031188174	0.008774699	0.014352803	0.006618194	0.963240045	0.014107981	0.001810161	0.014223619	0.085810581	0.883646162	0.008231455	0.022311803	0.061302697	0.888996787	0.014476878	0.035223638	0.076193998	0.881381968	0.00340005	0.039023983	0.080562549	0.008184837	0	0	0.891200193	0.00170908	0.018343341
2. CVD Fall	1	Men	2018	55	0.969944147	0.004791184	3.38E-05	0.006978727	0.010038185	0.000529955	0.007683966	0.954902821	0.001201285	0.028098592	0.005704712	0.010092591	0.921778279	0.042224911	0.01373366	0.022263151	0.006199214	0.956473895	0.01242625	0.002837628	0.022063012	0.07607517	0.876454584	0.012884987	0.034585259	0.067861084	0.854969739	0.022629221	0.054539955	0.083617192	0.850649863	0.005328038	0.060404907	0.089982959	0.009597186	0	0	0.869297245	0.002679233	0.028443377
2. CVD Fall	1	Men	2018	56	0.969274803	0.004965841	2.99E-05	0.005956005	0.011766633	0.000508081	0.007498732	0.9582919	0.003303909	0.02309143	0.005464865	0.009847896	0.922661163	0.042491128	0.013139907	0.021707802	0.006768085	0.954738164	0.01426131	0.002719532	0.02151291	0.07343876	0.880533622	0.012329544	0.033698074	0.109257196	0.816043144	0.021621131	0.053078529	0.084602527	0.851527088	0.005104326	0.058766059	0.08866456	0.008955106	0.000279578	0.029995179	0.841814016	0.002567792	0.027723769
2. CVD Fall	1	Men	2018	57	0.966382819	0.004771496	4.41E-05	0.009108578	0.011887621	0.000487129	0.007318282	0.952864465	0.009377618	0.02291347	0.005235	0.009609447	0.928239706	0.038023954	0.012570481	0.021165859	0.005670036	0.951535458	0.019212025	0.002606383	0.020976097	0.05769838	0.897673526	0.011796891	0.032831202	0.072387231	0.855310845	0.020653831	0.051648093	0.07822986	0.85971895	0.004889931	0.057161259	0.074915373	0.009948627	0.000224145	0.021809696	0.86362007	0.002461021	0.027021069
2. CVD Fall	1	Men	2018	58	0.965781865	0.004989144	4.30E-05	0.008507797	0.013068581	0.000467061	0.007142523	0.93688735	0.021372974	0.027347847	0.005014709	0.00937712	0.904322114	0.063016479	0.012024386	0.020637022	0.008246927	0.950499522	0.018303292	0.00249798	0.02045228	0.067510983	0.88921877	0.011286095	0.031984152	0.064807978	0.865218528	0.019725663	0.050247832	0.099134665	0.840591258	0.004684475	0.055589602	0.093217965	0.010931989	4.25E-06	0.000383929	0.86676826	0.00235873	0.026334882
2. CVD Fall	1	Men	2018	59	0.965935409	0.005289912	4.17E-05	0.007779538	0.013534233	0.000447841	0.006971367	0.941373741	0.015138932	0.029532929	0.004803601	0.009150798	0.932971026	0.035407303	0.011500668	0.020121003	0.007544805	0.95466307	0.015456823	0.00239413	0.019941172	0.065073151	0.892974139	0.010796263	0.031156447	0.045577379	0.886710617	0.018835042	0.048876962	0.075884585	0.865577604	0.004487591	0.054050219	0.085994121	0.00932692	3.00E-05	0.003171452	0.873551987	0.002260738	0.025664827
2. CVD Fall	1	Men	2018	60	0.968044149	0.005133338	1.22E-05	0.002361681	0.012548216	0.000668053	0.011232348	0.932680915	0.016812497	0.028607492	0.007158029	0.014741067	0.900271994	0.050236284	0.017109707	0.032382015	0.005562756	0.938322692	0.020451771	0.003569677	0.032093105	0.076605461	0.857236188	0.016064502	0.050093849	0.052715031	0.840849594	0.027971333	0.078464041	0.08668201	0.81990051	0.006687645	0.086729836	0.095544039	0.009710219	0.000154704	0.01552753	0.834408525	0.003370897	0.041284085
2. CVD Fall	1	Men	2018	61	0.960652514	0.00547027	4.07E-05	0.007352929	0.014878289	0.000640637	0.010964614	0.946391768	0.00242095	0.029944048	0.006856479	0.014386755	0.914621877	0.037446494	0.016360419	0.03157121	0.0071647	0.9374468	0.020676996	0.003421444	0.03129006	0.064020549	0.871826442	0.015363793	0.048789216	0.060817321	0.836192399	0.026695714	0.076294566	0.094669331	0.814632899	0.006406438	0.084291333	0.085277626	0.009530307	0	0	0.861731517	0.003231031	0.040229518
2. CVD Fall	1	Men	2018	62	0.960951729	0.005203944	3.38E-05	0.006412885	0.016079201	0.000614389	0.010704086	0.940637438	0.007428215	0.031324973	0.006567551	0.014041823	0.890704061	0.062873809	0.015641877	0.030780253	0.007523433	0.934556336	0.02413406	0.003279473	0.030506698	0.07430441	0.863489364	0.014691885	0.047514341	0.044478914	0.855879249	0.025471772	0.074170065	0.094383706	0.817577077	0.006137016	0.081902202	0.088790747	0.011841124	0.0001618	0.013318252	0.843591158	0.003097077	0.039199842
2. CVD Fall	1	Men	2018	63	0.957407223	0.006022166	5.01E-05	0.008192544	0.017288108	0.000589263	0.010450646	0.935170007	0.011359896	0.033473247	0.006290738	0.013706112	0.912265021	0.042773388	0.014952844	0.030008746	0.007602286	0.933381023	0.026130553	0.003143514	0.029742624	0.068520482	0.871163335	0.01404762	0.046268563	0.042567388	0.861045668	0.024297467	0.072089478	0.077265333	0.837294479	0.005878904	0.079561284	0.088004627	0.011567	0.000168631	0.014200475	0.844895945	0.002968799	0.038194524
2. CVD Fall	1	Men	2018	64	0.959384991	0.005958129	4.49E-05	0.007441392	0.016401147	0.000565213	0.010204187	0.925284336	0.016438198	0.038872438	0.006025556	0.013379473	0.902977098	0.05347445	0.014292142	0.02925631	0.007925678	0.938310511	0.02175302	0.003013328	0.028997463	0.068741393	0.872777465	0.013429893	0.045051249	0.085564864	0.821212476	0.023170855	0.070051805	0.093854389	0.823246465	0.005631651	0.077267495	0.100037721	0.011927179	0.000159817	0.013062445	0.834753807	0.00284597	0.03721306
2. CVD Fall	1	Men	2018	65	0.953519768	0.006099647	4.79E-05	0.0077382	0.017071523	0.000775266	0.01474773	0.925673165	0.011482246	0.035260556	0.00825247	0.019331563	0.871186377	0.067069986	0.019529887	0.04221375	0.007621991	0.92337993	0.023026482	0.004130404	0.041841193	0.070129421	0.84659864	0.018355978	0.064915961	0.067465214	0.800225333	0.031585634	0.10072382	0.08367636	0.797579619	0.007713821	0.1110302	0.093642148	0.011732899	0.000264068	0.021747143	0.815054793	0.003901184	0.053657766
2. CVD Fall	1	Men	2018	66	0.949981042	0.006173898	5.46E-05	0.008717255	0.019926195	0.000743781	0.014403193	0.924833136	0.012920168	0.035467706	0.007904603	0.018874387	0.87400222	0.066181319	0.018661438	0.041155023	0.008491811	0.914724197	0.032031409	0.003959801	0.040792782	0.078080879	0.841179011	0.017544143	0.063195967	0.065420662	0.806644987	0.030103328	0.097831023	0.079282127	0.805557831	0.007389515	0.107770527	0.099190003	0.011670531	0	0	0.833125528	0.003740233	0.052273705
2. CVD Fall	1	Men	2018	67	0.948229466	0.006973962	6.78E-05	0.009558373	0.020388177	0.000713663	0.014068574	0.927597781	0.009827724	0.036572959	0.007571471	0.018430066	0.890391247	0.051656851	0.017828887	0.040123016	0.008677918	0.915418217	0.032336471	0.003796518	0.039770876	0.065107949	0.856610536	0.016765927	0.061515588	0.053048239	0.823272202	0.028681664	0.094997895	0.086469979	0.801874549	0.007078967	0.104576505	0.093854444	0.0116912	0.000214082	0.017768016	0.821963132	0.003586193	0.050922934
2. CVD Fall	1	Men	2018	68	0.946111703	0.006951135	7.19E-05	0.010159963	0.022276721	0.000684859	0.01374376	0.915083615	0.01901156	0.040653887	0.007252497	0.017998441	0.879952674	0.063899199	0.017030836	0.03911729	0.009687007	0.914436893	0.033460792	0.00364027	0.038775038	0.067539518	0.856566371	0.016020021	0.05987409	0.064309814	0.816148457	0.027318366	0.092223363	0.081463732	0.81030761	0.006781639	0.101447018	0.093825743	0.011841354	0.000182527	0.014997842	0.826108879	0.003438795	0.049604861
2. CVD Fall	1	Men	2018	69	0.946848813	0.006546723	7.44E-05	0.011162562	0.021281529	0.000657321	0.013428651	0.916799169	0.014505326	0.044169003	0.006947134	0.017579368	0.876469185	0.069127419	0.016265958	0.038137438	0.009658744	0.911097977	0.037947626	0.003490787	0.037804866	0.079321016	0.84710302	0.015305176	0.058270788	0.061737763	0.822744502	0.026011275	0.089506461	0.054378197	0.840743702	0.006497021	0.098381081	0.105819145	0.013462128	0	0	0.829102004	0.003297786	0.048318937
2. CVD Fall	1	Men	2018	70	0.933176438	0.007172023	9.07E-05	0.012399967	0.024070652	0.001092016	0.021998188	0.900758297	0.015670061	0.043268258	0.011516968	0.028786416	0.834594761	0.076194154	0.026881551	0.062329533	0.011136228	0.88174008	0.039541998	0.005793761	0.061787933	0.069114063	0.810530087	0.02530188	0.09505397	0.038183389	0.773390138	0.042847043	0.14557943	0.084444811	0.744902102	0.010772399	0.159880687	0.096731028	0.013006805	0.000205611	0.015356363	0.79033252	0.005473787	0.078893886
2. CVD Fall	1	Men	2018	71	0.928990942	0.007509833	0.000113566	0.014783516	0.026051556	0.001048494	0.021502093	0.901949102	0.019712701	0.039179859	0.011032942	0.028125397	0.852250106	0.06131178	0.025666198	0.060771916	0.007702894	0.888801464	0.037692604	0.005557169	0.060245869	0.068416113	0.81492633	0.024166204	0.092491353	0.047543495	0.770473216	0.040769054	0.141214235	0.071093934	0.763634429	0.010321333	0.154950304	0.091838396	0.013979985	0	0	0.8120874	0.005250626	0.076843593
2. CVD Fall	1	Men	2018	72	0.929914353	0.007997212	0.000116748	0.01427178	0.025671086	0.001006927	0.021021893	0.899085231	0.019587059	0.043272967	0.010569884	0.02748486	0.85685249	0.059389577	0.024501996	0.059255937	0.010885121	0.883325754	0.041712996	0.005331013	0.058745116	0.0651247	0.821807019	0.02307841	0.089989871	0.062422423	0.761857415	0.038778227	0.136941935	0.067503389	0.772483895	0.009889849	0.150122867	0.108793129	0.015275003	0	0	0.796049705	0.005037321	0.074844842
[truncated: 170,770 more rows]
